# Supplementary material
Source: HighWire-hosted journal article supplement (https://jech.bmj.com/content/75/1/92)
Supplement: inline-supplementary-material-1 [file inline-supplementary-material-1.pdf]

## Supporting Information

### Combined lifestyle factors, all-cause mortality, and cardiovascular disease: a systematic review and meta-analysis of prospective cohort studies

Yan-Bo Zhang, Xiong-Fei Pan, Junxiang Chen, Anlan Cao, Lu Xia, Yuge Zhang, Jing Wang, Huiqi Li, Gang Liu, An Pan

**Table A1.** Examples of the definitions of the major lifestyle scores

| Factors           | Simple Score <sup>*,1</sup>                                                                                                                | Life's Simple seven Score <sup>2</sup>                                                                                                                                                                                                                                                                                                 | World Cancer Research Fund Score <sup>3</sup>                                                                                                                                                                                                                                              |
|-------------------|--------------------------------------------------------------------------------------------------------------------------------------------|----------------------------------------------------------------------------------------------------------------------------------------------------------------------------------------------------------------------------------------------------------------------------------------------------------------------------------------|--------------------------------------------------------------------------------------------------------------------------------------------------------------------------------------------------------------------------------------------------------------------------------------------|
| Smoking           | 1 point for never smokers;<br>0 point for ever smokers.                                                                                    | 2 points for never smokers or quitting >12 months;<br>1 point for quitting ≤12 months;<br>0 point for current smokers.                                                                                                                                                                                                                 | Not included.                                                                                                                                                                                                                                                                              |
| Alcohol drinking  | For men and women respectively:<br>1 point for 5-30/16 g/d;<br>0 point for <5 g/d or >30/15 g/d.                                           | Not included.                                                                                                                                                                                                                                                                                                                          | For men and women respectively:<br>1 point for ≤20/10 grams per day;<br>0.5 points for 20.1-30/10.1-20 grams per day;<br>0 point for >30/20 grams per day.                                                                                                                                 |
| Physical activity | 1 point for >30 min moderate to vigorous physical activity per day;<br>0 point for ≤30 min moderate to vigorous physical activity per day. | 2 points for moderate or moderate to vigorous physical activity ≥ 150 minutes per week or vigorous physical activity ≥ 75 minutes per week;<br>1 point for moderate or moderate to vigorous physical activity for 1-149 minutes per week or vigorous physical activity for 1-74 minutes per week;<br>0 point for no physical activity. | 1 point for manual/heavy manual job, or >2 h/w of vigorous physical activity, or >30 min/d of cycling/sports;<br>0.5 points for cycling/sports 15-30 min/d;<br>0 point for moderate physical activity <30 minutes per day or <five days per week or <seven years of the previous 10 years. |
| Body mass index   | 1 point for 18.5-24.9 kg/m <sup>2</sup> ;<br>0 point for <18.5 kg/m <sup>2</sup> or ≥ 25 kg/m <sup>2</sup> .                               | 2 points for <25 kg/m <sup>2</sup> ;<br>1 point for 25-29.99 kg/m <sup>2</sup> ;<br>0 point for ≥ 30 kg/m <sup>2</sup> .                                                                                                                                                                                                               | 1 point for 18.5-24.9 kg/m <sup>2</sup> ;<br>0.5 points for 25.0-29.9 kg/m <sup>2</sup> ;;<br>0 point for <18.5 kg/m <sup>2</sup> or ≥30.0 kg/m <sup>2</sup> .                                                                                                                             |
| Diet              | Evaluated by a dietary score, such as the                                                                                                  | Evaluated by American Heart Association food                                                                                                                                                                                                                                                                                           | Not included.                                                                                                                                                                                                                                                                              |

| <b>Factors</b> | <b>Simple Score <sup>*,1</sup></b>                                                                                                                                           | <b>Life's Simple seven Score<sup>2</sup></b>                                                                                    | <b>World Cancer Research Fund Score<sup>3</sup></b>                                                                                                                                                                                                                                                                                                                             |
|----------------|------------------------------------------------------------------------------------------------------------------------------------------------------------------------------|---------------------------------------------------------------------------------------------------------------------------------|---------------------------------------------------------------------------------------------------------------------------------------------------------------------------------------------------------------------------------------------------------------------------------------------------------------------------------------------------------------------------------|
|                | Alternate Healthy Eating Index, or the Mediterranean Diet Score, or self-defined diet score:<br>1 point for the top two quintiles;<br>0 point for the lower three quintiles. | guideline:<br>2 points for meeting 4-5 components;<br>1 point for meeting 2-3 components;<br>0 point for meeting 0-1 component. |                                                                                                                                                                                                                                                                                                                                                                                 |
| Energy density | Not included.                                                                                                                                                                | Not included.                                                                                                                   | 1 point for daily energy density $\leq 125$ kcal/100g;<br>0.5 points for daily energy density 126-175 kcal/100g;<br>0 point for energy density $>175$ kcal/100g;<br>1 point for no sugar-sweetened beverage consumption;<br>0.5 points for $\leq 250$ -gram sugar-sweetened beverage consumption daily;<br>0 point for $>250$ -gram sugar-sweetened beverage consumption daily. |
| Plant food     | Not included.                                                                                                                                                                | Not included.                                                                                                                   | 1 point for fruits and vegetables consumption $\geq 400$ g/d;<br>0.5 points for fruits and vegetables consumption 200-399 g/d;<br>0 point for fruits and vegetables consumption $<200$ g/d;<br>1 point for dietary fiber consumption $\geq 25$ g/d;<br>0.5 points for dietary fiber consumption 12.5-24.9 g/d;<br>0 point for dietary fiber consumption $<12.5$ g/d;            |
| Animal food    | Not included.                                                                                                                                                                | Not included.                                                                                                                   | 1 point for red meat consumption $<500$ g/w and processed meat consumption $<3$ g/d;<br>0.5 points for red meat consumption $<500$ g/w                                                                                                                                                                                                                                          |

| <b>Factors</b> | <b>Simple Score <sup>*,1</sup></b> | <b>Life's Simple seven Score<sup>2</sup></b>                                                                                                                                                                                                                 | <b>World Cancer Research Fund Score<sup>3</sup></b>                                                                                           |
|----------------|------------------------------------|--------------------------------------------------------------------------------------------------------------------------------------------------------------------------------------------------------------------------------------------------------------|-----------------------------------------------------------------------------------------------------------------------------------------------|
| Blood pressure | Not included.                      | For systolic blood pressure and diastolic blood pressure:<br>2 points for SBP <120 and DBP <80 mmHg without medication;<br>1 point for SBP 120-139 or DBP 80-89 mmHg, or SBP <120 and DBP <80 mmHg with medication;<br>0 point for SBP ≥140 or DBP ≥90 mmHg. | and processed meat consumption 3-49 g/d;<br>0 point for red meat consumption ≥500 g/w or processed meat consumption ≥50 g/d.<br>Not included. |
| Blood glucose  | Not included.                      | For fasting serum glucose:<br>2 points for <100 mg/dL without medication;<br>1 point for 100-125 mg/dl or <100 mg/dl with medication;<br>0 point for ≥126 mg/dl.                                                                                             | Not included.                                                                                                                                 |
| Blood lipid    | Not included.                      | For blood total cholesterol:<br>2 points for <200 mg/dl without medication;<br>1 point for 200-239 mg/dl or <200 mg/dl with medication;<br>0 point for ≥ 240 mg/dl.                                                                                          | Not included.                                                                                                                                 |

\*The simple scores only included behavioral factors, and the weights of included behavioral factors are identical. Those are just examples, and different studies may have varied definitions of healthy lifestyle factors for smoking, alcohol drinking, physical activity, body mass index, healthy diet; some studies may give more weight to certain variables, such as two for never smoking, one for past smoking, zero for current smoking, or two for normal weight, one for overweight and zero for obesity; some studies also included some other variables, such as sleep duration or quality, waist circumference, sedentary lifestyle.

DBP, diastolic blood pressure; SBP, systolic blood pressure.

**Table A2.** List of studies excluded from the main analyses after manual inspections

| Study                                                                                                          | Reasons for Exclusion from the Main Analyses                                                                                                                                                                                                                                                                                                                                    |
|----------------------------------------------------------------------------------------------------------------|---------------------------------------------------------------------------------------------------------------------------------------------------------------------------------------------------------------------------------------------------------------------------------------------------------------------------------------------------------------------------------|
| Thirty-six articles not reporting HR or RR or OR comparing the highest score group with the lowest score group |                                                                                                                                                                                                                                                                                                                                                                                 |
| Abdullah Said-2018 <sup>4</sup>                                                                                | In the study, each behavior was categorized into three groups, the ideal group, the intermediate group, and the poor group. And an ideal lifestyle was defined as no less than three ideal factors, whereas a poor lifestyle was defined as no less than three poor factors. We cannot differentiate different lifestyle groups by assigning different points to each behavior. |
| Avanzini-2016 <sup>5</sup>                                                                                     | The study only reported the HR for one additional healthy lifestyle factor, without reporting the HR comparing the healthiest lifestyle versus the least healthy one.                                                                                                                                                                                                           |
| Bai-2017 <sup>6</sup>                                                                                          | The study investigated the HRs comparing the healthiest lifestyle versus the others, instead of the least healthy lifestyle.                                                                                                                                                                                                                                                    |
| Berstad-2017 <sup>7</sup>                                                                                      | The investigators divided the participants into two groups, which restricted the estimation of HR comparing the healthiest lifestyle versus the least healthy lifestyle.                                                                                                                                                                                                        |
| Byun-2010 <sup>8</sup>                                                                                         | The study did not report the confidence interval of the HR comparing the healthiest lifestyle versus the least healthy lifestyle.                                                                                                                                                                                                                                               |
| Chyou-1997 <sup>9</sup>                                                                                        | The study divided each behavior into three categories, for example, participants were divided into <21.21, 21.21-26.30 and $\geq 26.31$ kg/m <sup>2</sup> according to body mass index. It's hard to decide which group was more hazardous, so the data cannot be transformed into the score form.                                                                              |
| Dagenais-2018 <sup>10</sup>                                                                                    | The investigators divided the participants into two groups, which restricted the estimation of HR comparing the healthiest lifestyle versus the least healthy lifestyle.                                                                                                                                                                                                        |
| Djousse-2009 <sup>11</sup>                                                                                     | The study did not report the HR comparing the healthiest lifestyles versus the least healthy lifestyles.                                                                                                                                                                                                                                                                        |
| Dobson-2012 <sup>12</sup>                                                                                      | The study used absolute risk as a statistic.                                                                                                                                                                                                                                                                                                                                    |
| Foraker-2016 <sup>13</sup>                                                                                     | The study only reported the HR for one additional healthy lifestyle factor, without reporting the HR comparing the healthiest lifestyle versus the least healthy one.                                                                                                                                                                                                           |
| Hardoon-2008 <sup>14</sup>                                                                                     | The study used population attributable risk as a statistic.                                                                                                                                                                                                                                                                                                                     |
| Haveman-Nies-2002 <sup>15</sup>                                                                                | The study did not report the confidence interval of the HR comparing the healthiest lifestyle versus the least healthy lifestyle.                                                                                                                                                                                                                                               |
| Heidemann-2009 <sup>16</sup>                                                                                   | The score included height and age which were unmodifiable.                                                                                                                                                                                                                                                                                                                      |
| Iestra-2006 <sup>17</sup>                                                                                      | The investigators divided the participants into two groups, which restricted the estimation of HR comparing the healthiest lifestyle versus the least healthy lifestyle.                                                                                                                                                                                                        |
| Khawaja-2012 <sup>18</sup>                                                                                     | The investigators divided the participants into two groups, which restricted the estimation of HR comparing the healthiest lifestyle versus the least healthy lifestyle.                                                                                                                                                                                                        |
| Kim-2013 <sup>19</sup>                                                                                         | The study used population attributable risk as a statistic.                                                                                                                                                                                                                                                                                                                     |

| <b>Study</b>                   | <b>Reasons for Exclusion from the Main Analyses</b>                                                                                                                                                                                                                                                                                                                                                                                                                                                                                                                           |
|--------------------------------|-------------------------------------------------------------------------------------------------------------------------------------------------------------------------------------------------------------------------------------------------------------------------------------------------------------------------------------------------------------------------------------------------------------------------------------------------------------------------------------------------------------------------------------------------------------------------------|
| Li-2014 <sup>20</sup>          | The study used population attributable risk as a statistic.                                                                                                                                                                                                                                                                                                                                                                                                                                                                                                                   |
| Li-2015 <sup>21</sup>          | The study only reported the HR for one additional healthy lifestyle factor, without reporting the HR comparing the healthiest lifestyle versus the least healthy one.                                                                                                                                                                                                                                                                                                                                                                                                         |
| Manuel-2015 <sup>22</sup>      | The study only reported the HR for one additional healthy lifestyle factor, without reporting the HR comparing the healthiest lifestyle versus the least healthy one.                                                                                                                                                                                                                                                                                                                                                                                                         |
| Manuel-2016 <sup>23</sup>      | The study used year lose as a statistic.                                                                                                                                                                                                                                                                                                                                                                                                                                                                                                                                      |
| Menotti-2014 <sup>24</sup>     | The study used life expectancy at 20 and 40 years old as a statistic.                                                                                                                                                                                                                                                                                                                                                                                                                                                                                                         |
| Menotti-2016 <sup>25</sup>     | The study used life expectancy at 50 years old as a statistic.                                                                                                                                                                                                                                                                                                                                                                                                                                                                                                                |
| Metzner-1983 <sup>26</sup>     | The study did not report the HRs comparing the healthiest lifestyle versus the least healthy lifestyle.                                                                                                                                                                                                                                                                                                                                                                                                                                                                       |
| Nakano-2006 <sup>27</sup>      | The investigators divided the participants into two groups, which restricted the estimation of HR comparing the healthiest lifestyle versus the least healthy lifestyle.                                                                                                                                                                                                                                                                                                                                                                                                      |
| O'Doherty-2016 <sup>28</sup>   | The study compared the participants who were overweight, light or moderate drinker, non-smokers, and partaking in vigorous physical activity with participants who were overweight, light or moderate drinker, smokers, and not partaking in vigorous physical activity, which restricted the estimation of HR comparing the healthiest lifestyle versus the least healthy lifestyle.                                                                                                                                                                                         |
| Pronk-2010 <sup>29</sup>       | The investigators divided the participants into two groups, which restricted the estimation of HR comparing the healthiest lifestyle versus the least healthy lifestyle.                                                                                                                                                                                                                                                                                                                                                                                                      |
| Rhee-2012 <sup>30</sup>        | The score included age which was unmodifiable.                                                                                                                                                                                                                                                                                                                                                                                                                                                                                                                                |
| Rotevatn-1989 <sup>31</sup>    | The study used observed/expected mortality ratio as a statistic.                                                                                                                                                                                                                                                                                                                                                                                                                                                                                                              |
| Shaw-2012 <sup>32</sup>        | The study defined non-drinkers and heavy drinkers as high-risk population, but respectively estimated the HRs comparing participants who were smoking, physically inactive and non-drinkers versus participants who were not smoking, physically active and moderate drinkers, and the HRs comparing participants who were smoking, physically inactive and heavy drinkers versus participants who were not smoking, physically active and moderate drinkers. And this restricted the estimation of HR comparing the healthiest lifestyle versus the least healthy lifestyle. |
| Spencer-2005 (1) <sup>33</sup> | The investigators divided the participants into two groups, which restricted the estimation of HR comparing the healthiest lifestyle versus the least healthy lifestyle.                                                                                                                                                                                                                                                                                                                                                                                                      |
| Spencer-2005 (2) <sup>34</sup> | The investigators divided the participants into two groups, which restricted the estimation of HR comparing the healthiest lifestyle versus the least healthy lifestyle.                                                                                                                                                                                                                                                                                                                                                                                                      |

| <b>Study</b>                                                                                         | <b>Reasons for Exclusion from the Main Analyses</b>                                                                                                                                                                                     |
|------------------------------------------------------------------------------------------------------|-----------------------------------------------------------------------------------------------------------------------------------------------------------------------------------------------------------------------------------------|
| Stampfer-2000 <sup>35</sup>                                                                          | The investigators only estimated the HR comparing participants with all healthy lifestyle factors versus the others, which restricted the estimation of HR comparing the healthiest lifestyle versus the least healthy lifestyle.       |
| Takeshita-1995 <sup>36</sup>                                                                         | The investigators divided the participants into two groups, which restricted the estimation of HR comparing the healthiest lifestyle versus the least healthy lifestyle.                                                                |
| Tikk-2014 <sup>37</sup>                                                                              | The study used absolute risk as a statistic.                                                                                                                                                                                            |
| Whitley-2014 <sup>38</sup>                                                                           | The study used population attributable risk as a statistic.                                                                                                                                                                             |
| Xanthakis-2014 <sup>39</sup>                                                                         | The study only reported the HR for one additional healthy lifestyle factor, without reporting the HR comparing the healthiest lifestyle versus the least healthy one.                                                                   |
| Yokoyama-2017 <sup>40</sup>                                                                          | The investigators divided the participants into two groups, which restricted the estimation of HR comparing the healthiest lifestyle versus the least healthy lifestyle.                                                                |
| Three articles investigating the relations of pre-decided outcomes with the change of lifestyle only |                                                                                                                                                                                                                                         |
| Enserro-2018 <sup>41</sup>                                                                           | The study only investigated the relationship between the change of the Life's simple seven score and cardiovascular disease incidence/all-cause mortality.                                                                              |
| King-2007 <sup>42</sup>                                                                              | The study only investigated the relations of improvement of the score with mortality and incident cardiovascular diseases.                                                                                                              |
| Shah-2015 <sup>43</sup>                                                                              | The study only investigated the relations of improvement of the score with incident heart failure and atrial fibrillation.                                                                                                              |
| Seventeen duplicate reporting from the same cohort studies                                           |                                                                                                                                                                                                                                         |
| Ahmad-2019 <sup>44</sup>                                                                             | There is another study from the National Health and Nutrition Examination Surveys III <sup>45</sup> investigating the relation of combined lifestyle factors with CVD mortality with larger sample size.                                |
| Belloc-1973 <sup>46</sup>                                                                            | There is another study <sup>47</sup> from the Alameda cohort investigating the relation of combined lifestyle factors with all-cause mortality with longer follow-up duration.                                                          |
| Cohen-2012 <sup>48</sup>                                                                             | The study investigated the relation of a score including non-narcotic analgesics usage with incident hypertension, whereas other analyses from Nurses' Health Study II <sup>21, 49</sup> constructed scores using five major behaviors. |
| Eguchi-2012 <sup>50</sup>                                                                            | There is another study <sup>51</sup> from the Japan Collaborative Cohort Study investigating the relation of combined lifestyle factors with death with longer follow-up duration.                                                      |
| Forman-2009 <sup>52</sup>                                                                            | There are other studies <sup>21, 49</sup> from Nurses' Health Study II investigating the relation of combined lifestyle factors with incident hypertension with longer follow-up duration.                                              |
| Gao-2015 <sup>53</sup>                                                                               | The study investigated the relation of combined lifestyle factors with incident hypertension in the prehypertensive population, whereas                                                                                                 |

| Study                       | Reasons for Exclusion from the Main Analyses                                                                                                                                                                                                                                                                                                                               |
|-----------------------------|----------------------------------------------------------------------------------------------------------------------------------------------------------------------------------------------------------------------------------------------------------------------------------------------------------------------------------------------------------------------------|
| Kabat-2015 <sup>55</sup>    | <p>another analysis in Kailuan study<sup>54</sup> was conducted in general population.</p> <p>There is another study<sup>56</sup> from the American Association of Retired Persons study investigating the relation of combined lifestyle factors with all-cause mortality with longer follow-up duration.</p>                                                             |
| Kurth-2006 <sup>57</sup>    | <p>There is another study<sup>58</sup> from Women's Health Study investigating the relation of combined lifestyle factors with incident stroke with longer follow-up duration.</p>                                                                                                                                                                                         |
| Mancini-2019 <sup>59</sup>  | <p>There is another study<sup>60</sup> from Clinical Outcomes Utilizing Revascularization and Aggressive Drug Evaluation trial investigating the relation of combined lifestyle factors with all-cause mortality with a larger sample size.</p>                                                                                                                            |
| Matheson-2012 <sup>61</sup> | <p>There is another study<sup>45</sup> from National Health and Nutrition Examination Surveys III investigating the relation of combined lifestyle factors with death with longer follow-up duration.</p>                                                                                                                                                                  |
| Myint-2011 <sup>62</sup>    | <p>This study failed to derive the relative risk of combined lifestyle factors for death by Cox regression or logistic regression, whereas another European Prospective Investigation into Cancer and Nutrition-Norfolk study<sup>63</sup> conducted such analyses.</p>                                                                                                    |
| Perrot-2017 <sup>64</sup>   | <p>The study investigated the interaction of lifestyle and genetics on incident cardiovascular disease, whereas another European Prospective Investigation into Cancer and Nutrition-Norfolk study<sup>65</sup> investigated the effects of lifestyle.</p>                                                                                                                 |
| Veronese-2016 <sup>66</sup> | <p>The study investigated the interaction of body weight and lifestyle and failed to report the relative risk for all-cause mortality and cause-specific mortality. Whereas other studies<sup>1, 67</sup> conducted in Nurses' Health Study and Health Professionals Follow-up Study investigated the relations of combined lifestyle factors with mortality directly.</p> |
| Weikert-2007 <sup>68</sup>  | <p>There is another study from European Prospective Investigation into Cancer and Nutrition-Potsdam<sup>69</sup> investigating the relation of combined lifestyle factors with incident stroke with longer follow-up duration.</p>                                                                                                                                         |
| Yang-2016 <sup>70</sup>     | <p>There is another study from Kailuan study<sup>71</sup> investigating the relation of combined lifestyle factors with incident stroke with longer follow-up duration.</p>                                                                                                                                                                                                |
| Zhang-2012 <sup>72</sup>    | <p>The study investigated the interaction of lifestyle and antihypertensive treatment on incident stroke, whereas another MONItoring trends and determinants of Cardiovascular disease-Finland study<sup>73</sup> investigated the relation of combined lifestyle factors with incident stroke directly.</p>                                                               |
| Zhao-2016 <sup>74</sup>     | <p>The study investigated the relation of cumulative Life's simple seven score with incident hypertension. Whereas another Kailuan study<sup>54</sup> investigated the relation of baseline Life's simple seven score with incident hypertension.</p>                                                                                                                      |

HR, hazard ratio.

**Table A3.** Characteristics of studies related to all-cause mortality

| Author-year                  | Cohort                                | Country | Follow-up duration (mean or median) | Men (%) | Age (mean)    | Ethnicity (%)*                            | Proportion of high school graduates (%) | Health status      | Sample size | Outcome attainment                                                                          | Definition of healthy lifestyle                                                                                                                                                                                                                                                                                                                                                                                                                                             | NOS score |
|------------------------------|---------------------------------------|---------|-------------------------------------|---------|---------------|-------------------------------------------|-----------------------------------------|--------------------|-------------|---------------------------------------------------------------------------------------------|-----------------------------------------------------------------------------------------------------------------------------------------------------------------------------------------------------------------------------------------------------------------------------------------------------------------------------------------------------------------------------------------------------------------------------------------------------------------------------|-----------|
| Ahmed-2013 <sup>75</sup>     | Multi-Ethnic Study of Atherosclerosis | US      | 2000-2011 (7.60)                    | 47.00   | 44-84 (62.00) | White 62.00<br>Black 26.00<br>Asian 13.00 | 82.30                                   | general population | 6229        | All-cause mortality was retrieved from death certificates.                                  | Smoking: 1. not current smokers; 0. current smokers.<br>PA: 1. MPA >150 min/w or VPA >75 min/w; 0. MPA ≤150 min/w and VPA ≤75 min/w.<br>BMI: 1. 18.5-24.9; 0. ≥25 or <18.5.<br>Diet (MDS, FFQ): 1. above the median; 0. below the median.                                                                                                                                                                                                                                   | 9         |
| Artero-2012 <sup>†, 76</sup> | Aerobics Center Longitudinal Study    | US      | 1987-2003 (11.60)                   | 75.67   | 20-88 (46.00) | White >99.00                              | >70.00                                  | general population | 11993       | All-cause mortality was identified through the National Death Index and death certificates. | Smoking: 1. never smokers; 0. ever smokers;<br>PA: 1. ≥500 MET-min/w; 0. <500 MET-min/w.<br>BMI: 1. 18.5-24.9 kg/m <sup>2</sup> ; 0. ≥25 kg/m <sup>2</sup> .<br>Diet (AHA, 3-d dietary record): 1. 3-4 components; 0. 0-2 components.<br>SBP/DBP: 1. <120 and 80 mmHg (not treated); 0. <120 and 80 mmHg (treated) or ≥120 or 80 mmHg.<br>FPG: 1. <100 mg/dl (not treated); 0. <100 mg/dl (treated) ≥100 mg/d.<br>TC: 1. <200 mg/dl (not treated); 0. ≥200 mg/dl (treated). | 9         |
| Atkins-2018 <sup>77</sup>    | Clinical Practice Research Datalink   | UK      | 2000-2016 (6.25)                    | 48.83   | 60-69 (63.55) | White predominant                         | NA                                      | general population | 421411      | The methods of identifying all-cause mortality, CVD events (CHD,                            | Clinical Practice Research Datalink:<br>Smoking: 2. never smokers; 1. former smokers; 0. current smokers.<br>PA: 2. vigorous activity; 1. moderate                                                                                                                                                                                                                                                                                                                          | 7         |



| Author-year | Cohort       | Country | Follow-up duration (mean or median) | Men (%) | Age (mean) | Ethnicity (%)* | Proportion of high school graduates (%) | Health status | Sample size | Outcome attainment                                   | Definition of healthy lifestyle                                                                                                                                                                                                                                                                                                                                                                                                                                                                                                                                                                                                                                                                                                                                                                                                                                                                                                                                                                           | NOS score |
|-------------|--------------|---------|-------------------------------------|---------|------------|----------------|-----------------------------------------|---------------|-------------|------------------------------------------------------|-----------------------------------------------------------------------------------------------------------------------------------------------------------------------------------------------------------------------------------------------------------------------------------------------------------------------------------------------------------------------------------------------------------------------------------------------------------------------------------------------------------------------------------------------------------------------------------------------------------------------------------------------------------------------------------------------------------------------------------------------------------------------------------------------------------------------------------------------------------------------------------------------------------------------------------------------------------------------------------------------------------|-----------|
|             | & UK Biobank |         |                                     |         |            |                |                                         |               |             | stroke, and HF), and cancer cases were not reported. | <p>activity; 0. none or mild activity. BMI: 2. &lt;25 kg/m<sup>2</sup>; 1. 25-29.99 kg/m<sup>2</sup>; 0. ≥30 kg/m<sup>2</sup>. SBP/DBP: 2. &lt;120 and 80 mmHg (untreated); 1. 120-139 or 80-89 mmHg or &lt;120 and 80 mmHg (treated); 0. ≥140 or 90 mmHg. FSG: 2. &lt;5.6 mmol/l (not treated) or no data on FSG or diabetes; 1. 5.6-7 mmol/l (not treated) or &lt;5.6 mmol/l (treated), or diabetes diagnosis and not treated or with no treatment information; 0. &gt;7 mmol/l or diabetes diagnosis and treated. TC: 2. &lt;5.172 mmol/l (not treated) or no data on TC; 1. 5.172-6.21 mmol/l (not treated), or &lt;5.172 mmol/l (treated), or hypercholesterolemia diagnosis and not treated or with no treatment information; 0. &gt;6.21 mmol/l, or hypercholesterolemia diagnosis and treated.</p> <p>UK Biobank:<br/>Smoking: 2. never or quitting &gt;12 m; 1. quitting ≤12 m; 0. current.<br/>PA: 2. MPA ≥150 min/w, or VPA ≥75 min/w, or MVPA ≥150 min/w; 1. MPA 1-149 min/w, or VPA 1-74</p> |           |

| Author-year                | Cohort                                  | Country | Follow-up duration (mean or median) | Men (%) | Age (mean)    | Ethnicity (%)* | Proportion of high school graduates (%) | Health status      | Sample size | Outcome attainment                                                                                                     | Definition of healthy lifestyle                                                                                                                                                                                                                                                                                                                                                                                                                                                                                                                                                                                                                                                                                                                                                                                                                                                                                             | NOS score |
|----------------------------|-----------------------------------------|---------|-------------------------------------|---------|---------------|----------------|-----------------------------------------|--------------------|-------------|------------------------------------------------------------------------------------------------------------------------|-----------------------------------------------------------------------------------------------------------------------------------------------------------------------------------------------------------------------------------------------------------------------------------------------------------------------------------------------------------------------------------------------------------------------------------------------------------------------------------------------------------------------------------------------------------------------------------------------------------------------------------------------------------------------------------------------------------------------------------------------------------------------------------------------------------------------------------------------------------------------------------------------------------------------------|-----------|
| Behrens-2013 <sup>56</sup> | American Association of Retired Persons | US      | 1995-2009 (12.50)                   | 59.21   | 50-71 (62.50) | White 77.90    | >77.37                                  | general population | 170672      | Deaths were identified through the Social Security Administration Death Master File and the National Death Index Plus. | min/w, or MVPA 1-149 min/w; 0. none.<br>BMI: 2. <25 kg/m <sup>2</sup> ; 1. 25-29.99 kg/m <sup>2</sup> ; 0. ≥30 kg/m <sup>2</sup> .<br>SBP/DBP: 2. <120 and 80 mmHg (untreated); 1. 120-139 or 80-89 mmHg or <120 and 80 mmHg (treated); 0. ≥140 or 90 mmHg.<br>FSG: 2. no self-reported prevalent diabetes and no insulin medication; 1. self-reported prevalent diabetes but no insulin medication; 0. self-reported prevalent diabetes and insulin medication.<br>TC: 2. no self-reported prevalent high cholesterol and no cholesterol medication; 1. self-reported prevalent high cholesterol but no cholesterol medication; 0. self-reported prevalent high cholesterol and cholesterol medication.<br>Smoking: 1. never smoking or quitting smoking ≥10 years; 0. quitting smoking <10 years or current smoking.<br>PA: 1. MPA ≥30 min/episode and ≥5 episodes/w or VPA ≥20 min/episode and ≥3 episodes/w; 0. MPA <30 | 8         |

| Author-year               | Cohort                                                              | Country | Follow-up duration (mean or median) | Men (%) | Age (mean)    | Ethnicity (%)*    | Proportion of high school graduates (%) | Health status      | Sample size | Outcome attainment                                                                                                                                                                               | Definition of healthy lifestyle                                                                                                                                                                                                                                                                                                                                                                                                                                                                                                                                                                                                                                                                                                                                                                                                                                                                        | NOS score |
|---------------------------|---------------------------------------------------------------------|---------|-------------------------------------|---------|---------------|-------------------|-----------------------------------------|--------------------|-------------|--------------------------------------------------------------------------------------------------------------------------------------------------------------------------------------------------|--------------------------------------------------------------------------------------------------------------------------------------------------------------------------------------------------------------------------------------------------------------------------------------------------------------------------------------------------------------------------------------------------------------------------------------------------------------------------------------------------------------------------------------------------------------------------------------------------------------------------------------------------------------------------------------------------------------------------------------------------------------------------------------------------------------------------------------------------------------------------------------------------------|-----------|
| Berard-2017 <sup>78</sup> | MONitoring trends and determinants of Cardiovascular disease-France | France  | 1994-2013 (18.00)                   | 73.00   | 35-64 (51.47) | White predominant | 32.30                                   | general population | 1311        | Death was identified through National Identification Register of Private Individuals, and main and associated causes of death were provided by the French National Institute of Health Research. | min/episode or <5 episodes/w and VPA <20 min/episode or <3 episodes/w.<br>WC (M/F): 1. <102/88 cm; 0. ≥102/88cm.<br>Diet (aMDS, FFQ): 1. ≥5 points; 0. <5 points.<br>Smoking: 6. never smokers; 5. former smokers; 3. current smokers smoking 1-8 cigarettes/d; 2. current smokers smoking 9-15 cigarettes/d; 1. current smokers smoking 17-20 cigarettes/d; 0. current smokers smoking 23-60 cigarettes/d.<br>Alcohol drinking (M/F): 2. 1-2/1 drink/d; 1. teetotalers; -1. ≥3/2 drinks/d.<br>PA: 2. intense PA ≥20 min/episode and ≥3 episodes/w; 1.5. intense PA ≥20 min/episode and 1-2 episodes/w; 1. light PA almost every week; 0. no regular PA.<br>BMI: 2. <25.0 kg/m <sup>2</sup> ; 1.5. 25.0-29.9 kg/m <sup>2</sup> ; 1. 30.0-39.9 kg/m <sup>2</sup> ; 0. ≥40.0 kg/m <sup>2</sup> .<br>Diet (score consisting of sugar, FA, DF, fruits, vegetables, fish and sodium consumption, 3-day food | 9         |

| Author-year                 | Cohort              | Country | Follow-up duration (mean or median) | Men (%) | Age (mean)    | Ethnicity (%)*             | Proportion of high school graduates (%) | Health status      | Sample size | Outcome attainment                                                                                              | Definition of healthy lifestyle                                                                                                                                                                                                                                                                                                                                                                                                                                                            | NOS score |
|-----------------------------|---------------------|---------|-------------------------------------|---------|---------------|----------------------------|-----------------------------------------|--------------------|-------------|-----------------------------------------------------------------------------------------------------------------|--------------------------------------------------------------------------------------------------------------------------------------------------------------------------------------------------------------------------------------------------------------------------------------------------------------------------------------------------------------------------------------------------------------------------------------------------------------------------------------------|-----------|
|                             |                     |         |                                     |         |               |                            |                                         |                    |             |                                                                                                                 | record); 4. most adherent quartile; 3. second adherent quartile; 2. third adherent quartile; 1. least adherent quartile.<br>SBP/DBP: 3. <120 and 80 mmHg; 2.5. 120-129 or 80-84 mmHg; 2. 130-139 or 85-89 mmHg; 1.5. 140-159 or 90-99 mmHg; 1. 160-179 or 100-109 mmHg; 0. ≥180 or ≥110 mmHg.<br>FBG: 3. 2.75-4.92 mmol/l; 2. 4.93-5.38 mmol/l; 1. 5.39-5.88 mmol/l; 0. 5.89-18.82 mmol/l.<br>HDL-c: 2. 1.86-3.50 mmol/l; 0. 1.58-1.85 mmol/l; -1. 1.33-1.57 mmol/l; -2. 0.35-1.32 mmol/l. |           |
| Bonaccio-2019 <sup>79</sup> | Molisan Study       | Italy   | 2005-2015 (8.20)                    | 47.7    | 35-NA (55.00) | White predominant          | >12.90                                  | General population | 22839       | All-cause mortality was assessed by the Italian mortality registry and validated by Italian death certificates. | Smoking: 1. abstention from smoking; 0. current smoking.<br>PA: 1. LTPA ≥30 min/d; 0. LTPA <30 min/d.<br>WHR (M/F): 1. <0.90/0.85; 0. ≥0.90/0.85.<br>Diet (MDS, FFQ): 1. above the sex-specific medians; 0. not above the sex-specific medians.                                                                                                                                                                                                                                            | 9         |
| Booth-2014 <sup>80</sup>    | Reasons for Geograp | US      | 2003-2009 (4.30)                    | 64.08   | 45-79 (68.79) | White 58.23<br>Black 41.77 | 82.73                                   | CHD patients       | 4174        | All-cause mortality was identified through telephone                                                            | Smoking: 1. not current smokers; 0. current smokers.<br>PA: 1. ≥4 times/w; 0. <4 times/w.                                                                                                                                                                                                                                                                                                                                                                                                  | 8         |

| Author-year                | Cohort                                                  | Country | Follow-up duration (mean or median) | Men (%) | Age (mean)    | Ethnicity (%)*             | Proportion of high school graduates (%) | Health status                                  | Sample size | Outcome attainment                                                                                                                                                                                            | Definition of healthy lifestyle                                                                                                                                                                                                    | NOS score |
|----------------------------|---------------------------------------------------------|---------|-------------------------------------|---------|---------------|----------------------------|-----------------------------------------|------------------------------------------------|-------------|---------------------------------------------------------------------------------------------------------------------------------------------------------------------------------------------------------------|------------------------------------------------------------------------------------------------------------------------------------------------------------------------------------------------------------------------------------|-----------|
|                            | hic and Racial Differences in Stroke                    |         |                                     |         |               |                            |                                         |                                                |             | contact with participants or proxies, adjudicated by medical records, death certificates, autopsy reports, online sources, and the National Death Index.                                                      | WC (M/F): 1. ≤102/88 cm; 0. >102/88 cm.<br>Diet (MDS, FFQ): 1. top 20%; 0. lower 80%.                                                                                                                                              |           |
| Booth-2016 <sup>81</sup>   | Reasons for Geographic and Racial Differences in Stroke | US      | 2003-2012 (5.80)                    | 57.56   | 45-79 (66.60) | White 58.23<br>Black 41.77 | 89.14                                   | population with a 10-year predicted risk ≥7.5% | 5709        | All-cause mortality was identified through telephone contact with participants or proxies, adjudicated by medical records, death certificates, autopsy reports, online sources, and the National Death Index. | Smoking: 1. not current smokers; 0. current smokers.<br>PA: 1. ≥5 times/w; 0. <5 times/w.<br>WC (M/F): 1. ≤102/88 cm; 0. >102/88 cm.<br>Diet (MDS, FFQ): 1. top 20%; 0. lower 80%.<br>Diet (SFA intake): 1. top 20%; 0. lower 80%. | 8         |
| Breslow-1980 <sup>47</sup> | "Alameda cohort"                                        | US      | 1965-1974 (8.61)                    | 44.22   | NA (<53.28)   | White 84.00                | NA                                      | general population                             | 4864        | All-cause mortality was identified through active follow-up.                                                                                                                                                  | Smoking: 1. never smokers; 0. ever smokers.<br>Alcohol drinking: 1. ≤4 drinks/episode; 0. >4 drinks/episode.<br>PA: 1. often or sometimes engage in active sports, swim or take long walks, or often garden or do physical         | 5         |

| Author-year                 | Cohort                  | Country | Follow-up duration (mean or median) | Men (%) | Age (mean)    | Ethnicity (%)*    | Proportion of high school graduates (%) | Health status      | Sample size | Outcome attainment                                                                                        | Definition of healthy lifestyle                                                                                                                                                                                                                                                                                                                                                                                                                                                                                                                                                                                                                                                                      | NOS score |
|-----------------------------|-------------------------|---------|-------------------------------------|---------|---------------|-------------------|-----------------------------------------|--------------------|-------------|-----------------------------------------------------------------------------------------------------------|------------------------------------------------------------------------------------------------------------------------------------------------------------------------------------------------------------------------------------------------------------------------------------------------------------------------------------------------------------------------------------------------------------------------------------------------------------------------------------------------------------------------------------------------------------------------------------------------------------------------------------------------------------------------------------------------------|-----------|
| Carlsson-2010 <sup>82</sup> | "Stockholm County 1969" | Sweden  | 1969-1996 (NA)                      | 50.85   | 18-64 (NA)    | White predominant | NA                                      | general population | 1174        | All-cause mortality was identified through the National Cause of Death Register                           | <p>exercises; 0. not often or sometimes engage in active sports, swim or take long walks, or often garden or do physical exercises.</p> <p>BMI (M/F): 1. between 20%-95%/10%-90% desirable weight for height; 0. &lt;20%/10% or &gt;95%/90% desirable weight for height.</p> <p>Diet (eating breakfast almost every day): 1. yes; 0. no.</p> <p>Diet (eating between meals once in a while, rarely or never): 1. yes; 0. no.</p> <p>Sleep: 1. 7-8 h/d; 0. &lt;7 or &gt;8 h/d.</p> <p>Smoking: 1. non-smokers; 0. smokers.</p> <p>Physically fitness (median maximal oxygen consumption): 1. &gt;30 ml/kg/min; 0. ≤30 ml/kg/min.</p> <p>BMI: 1. &lt;30 kg/m<sup>2</sup>; 0. ≥30 kg/m<sup>2</sup>.</p> | 8         |
| Carlsson-2013 <sup>83</sup> | "Stockholm County 1997" | Sweden  | 1997-NA (10.85)                     | 48.18   | 60-60 (60.00) | White predominant | 37.89                                   | general population | 4232        | All-cause mortality was identified through the In Hospital Care Register and the Cause of Death Register. | <p>Smoking: 1. not current smokers; 0. current smokers.</p> <p>Alcohol drinking: 1. 0.6-30 g/d; 0. &lt;0.6 g/d or &gt;30 g/d.</p> <p>PA: 1. LTPA (MVPA) ≥once /w; 0. LTPA &lt;once /w.</p> <p>Diet (fish intake): 1. weekly; 0. &lt;once /w.</p> <p>Diet (processed meats as a main</p>                                                                                                                                                                                                                                                                                                                                                                                                              | 9         |

| Author-year                    | Cohort                    | Country | Follow-up duration (mean or median) | Men (%) | Age (mean)    | Ethnicity (%)*    | Proportion of high school graduates (%) | Health status      | Sample size | Outcome attainment                                                                                           | Definition of healthy lifestyle                                                                                                                                                                                                                                                                                                                                                                                                                                                                                                                                                                                                                                                                                                                                                                                               | NOS score |
|--------------------------------|---------------------------|---------|-------------------------------------|---------|---------------|-------------------|-----------------------------------------|--------------------|-------------|--------------------------------------------------------------------------------------------------------------|-------------------------------------------------------------------------------------------------------------------------------------------------------------------------------------------------------------------------------------------------------------------------------------------------------------------------------------------------------------------------------------------------------------------------------------------------------------------------------------------------------------------------------------------------------------------------------------------------------------------------------------------------------------------------------------------------------------------------------------------------------------------------------------------------------------------------------|-----------|
| Cerhan-2004 <sup>†, 84</sup>   | Iowa Women's Health Study | US      | 1986-1998 (11.39)                   | 0       | 55-69 (61.70) | White predominant | 86.10                                   | general population | 29838       | All-cause mortality was identified through mailed follow-up surveys and linkage to the National Death Index. | meal): 1. <once /w; 0. weekly;<br>Diet (fruit intake): 1. daily; 0. <once /d.<br>Diet (vegetable intake): 1. daily; 0. <once /d.<br>Alcohol drinking: 1. <1 drink/d (14 g/d); 0. ≥1 drinks/d.<br>PA: 1. exercise moderately daily and vigorously ≥1 h/w; 0. exercise moderately <once /d or vigorously <1 h/w.<br>BMI: 1. ≤25.0 kg/m <sup>2</sup> ; 0. >25.0 kg/m <sup>2</sup> .<br>Weight gain since age 18: 1. <11 pounds; 0. ≥11 pounds.<br>Diet (vegetable and fruit intake excluding pulses and starchy, FFQ): 1. ≥5 servings/d; 0. <5 servings/d.<br>Diet (complex carbohydrates intake, FFQ): 1. ≥400 g/d; 0. <400 g/d.<br>Diet (red meat intake, FFQ): 1. <80 g/d; 0. ≥80 g/d.<br>Diet (consumption of fat as percentage total calories, FFQ): 1. ≤30%; 0. >30%.<br>Diet (sodium, FFQ): 1. <2400 mg/d; 0. ≥2400 mg/d. | 7         |
| Chakravarty-2012 <sup>85</sup> | “a cohort of              | US      | 1986-2005 (15.60)                   | 77.20   | NA (68.00)    | White predominant | 100                                     | general population | 2327        | All-cause mortality was ascertained                                                                          | Smoking: 1. not current smokers; 0. current smokers.                                                                                                                                                                                                                                                                                                                                                                                                                                                                                                                                                                                                                                                                                                                                                                          | 8         |

| Author-year              | Cohort                                                          | Country | Follow-up duration (mean or median) | Men (%) | Age (mean)    | Ethnicity (%)*             | Proportion of high school graduates (%) | Health status                                                 | Sample size | Outcome attainment                                                                                                                                                                                  | Definition of healthy lifestyle                                                                                                                                                                                                                                                                                                                                                                                                                                                                   | NOS score |
|--------------------------|-----------------------------------------------------------------|---------|-------------------------------------|---------|---------------|----------------------------|-----------------------------------------|---------------------------------------------------------------|-------------|-----------------------------------------------------------------------------------------------------------------------------------------------------------------------------------------------------|---------------------------------------------------------------------------------------------------------------------------------------------------------------------------------------------------------------------------------------------------------------------------------------------------------------------------------------------------------------------------------------------------------------------------------------------------------------------------------------------------|-----------|
| Cheng-2018 <sup>86</sup> | University of Pennsylvania alumni”<br>Iowa Women’s Health Study | US      | 1986-2012 (≥16.63)                  | 0       | 55-69 (61.70) | White predominant          | 86.10                                   | General population                                            | 35221       | Deaths were identified through the State Health Registry of Iowa and the National Death Index. The underlying cause of death was assigned and coded by state vital registries according to the ICD. | PA: 1. any VPA that works up a sweat; 0. absence of VPA that works up a sweat.<br>BMI: 1. 18.5-25.0 kg/m <sup>2</sup> ; 0. <18.5 kg/m <sup>2</sup> or >25.0 kg/m <sup>2</sup> .<br>Smoking: 5. never smokers; 2.24. former smokers; 0.56. current smokers.<br>PA: 7.25. VPA ≥twice/w or MPA >4 times/w; 3.95. VPA once/w plus MPA once/w, or MPA 2–4 times/w; 1. no VPA or MPA <twice/w.<br>BMI: 5. <25.0 kg/m <sup>2</sup> ; 3.09. 25.0–29.9 kg/m <sup>2</sup> ; 0.78. ≥30.0 kg/m <sup>2</sup> . | 8         |
| Cloud-2015 <sup>87</sup> | Breast Cancer Family Registry                                   | US      | 1995-2012 (9.17)                    | 0       | NA (48.87)    | White 100                  | 90-92.6                                 | women with breast cancer or a family history of breast cancer | 2905        | All-cause mortality was identified through self or relative report and matching of participants to the National Death Index.                                                                        | Alcohol drinking: 1. ≤1 drink/d; 0. >1 drink/d;<br>PA: 1. MPA ≥150 min/w; 0. MPA <150 min/w.<br>BMI: 1. <25 kg/m <sup>2</sup> ; 0. ≥25 kg/m <sup>2</sup> .                                                                                                                                                                                                                                                                                                                                        | 7         |
| Diaz-2014 <sup>88</sup>  | Reasons for Geograp                                             | US      | 2003-NA (4.50)                      | 49.20   | 45-NA (67.60) | White 39.50<br>Black 60.50 | 80.80                                   | apparent treatment-resistant                                  | 2043        | All-cause mortality was identified through interviews                                                                                                                                               | Smoking: 1. not current smokers; 0. current smokers.<br>Alcohol drinking (M/F): 1. 1-14/7                                                                                                                                                                                                                                                                                                                                                                                                         | 7         |



| Author-year             | Cohort                               | Country   | Follow-up duration (mean or median) | Men (%) | Age (mean) | Ethnicity (%)* | Proportion of high school graduates (%) | Health status          | Sample size | Outcome attainment                                                                         | Definition of healthy lifestyle                                                                                                                                                                                                                                                                                                                                                                                                                                                                                                      | NOS score |
|-------------------------|--------------------------------------|-----------|-------------------------------------|---------|------------|----------------|-----------------------------------------|------------------------|-------------|--------------------------------------------------------------------------------------------|--------------------------------------------------------------------------------------------------------------------------------------------------------------------------------------------------------------------------------------------------------------------------------------------------------------------------------------------------------------------------------------------------------------------------------------------------------------------------------------------------------------------------------------|-----------|
|                         | hic and Racial Differences in Stroke |           |                                     |         |            |                |                                         | hypertensi on patients |             | of participants, proxy, next-of-kin, or medical record.                                    | drinks/w; 0. <1 drink/w or >14/7 drinks/w.<br>PA: 1. $\geq 4$ d/w; 0. <4 d/w.<br>WC (M/F): 1. $\leq 102/88$ cm; 0. >102/88 cm.<br>Diet (DASH score, FFQ): 1. highest quartile ( $\geq 27$ points); 0. lower three quartiles (<27 points).<br>Diet (sodium/potassium intake, FFQ): 1. lowest quartile ( $\leq 0.71$ g/d); 0. higher three quartiles (>0.71 g/d).                                                                                                                                                                      |           |
| Ding-2015 <sup>89</sup> | 45 and Up Study                      | Australia | 2006-2014 (6.00)                    | 47.10   | 45-NA (NA) | NA             | 67.42                                   | general population     | 231048      | All-cause mortality was ascertained from the NSW Registry of Births, Deaths and Marriages. | Smoking: 1. not current smokers; 0. current smokers.<br>Alcohol drinking: 1. $\leq 14$ drinks/w (one drink=one glass of wine, 1.5 pints of beer, one shot of spirits); 0. >14 drinks/w<br>PA: 1. MVPA $\geq 150$ min/w; 0. MVPA <150 min/w.<br>Sedentary behavior: 1. sitting $\leq 7$ h/d; 0. sitting >7 h/d.<br>Diet (Dietary Guidelines for Australians, consisting of vegetable, fruit, fish, processed meat, and types of milk, questionnaire): 1. $\geq 6$ points; 0. <6 points.<br>Sleeping: 1. 7-9 h/d; 0. <7 h/d or >9 h/d. | 9         |

| Author-year                | Cohort                                                                           | Country       | Follow-up duration (mean or median) | Men (%) | Age (mean)     | Ethnicity (%)*             | Proportion of high school graduates (%) | Health status                     | Sample size | Outcome attainment                                                                                                                                  | Definition of healthy lifestyle                                                                                                                                                                                                                                                                                                                                                                                                                                                                                                                                                           | NOS score |
|----------------------------|----------------------------------------------------------------------------------|---------------|-------------------------------------|---------|----------------|----------------------------|-----------------------------------------|-----------------------------------|-------------|-----------------------------------------------------------------------------------------------------------------------------------------------------|-------------------------------------------------------------------------------------------------------------------------------------------------------------------------------------------------------------------------------------------------------------------------------------------------------------------------------------------------------------------------------------------------------------------------------------------------------------------------------------------------------------------------------------------------------------------------------------------|-----------|
| Dong-2012 <sup>90</sup>    | Northern Manhattan Study                                                         | US            | 1993-2011 (11.00)                   | 36.30   | 40-107 (69.00) | White 75.00<br>Black 24.99 | 43.20                                   | general population                | 2981        | All-cause mortality was identified through death certificates, medical records of hospitalizations, family interviews, and primary care physicians. | Smoking: 1. never smokers or quitting >1 year; 0. quitting ≤1 year or current smokers;<br>PA: 1. MPA ≥150 min/w or VPA ≥75 min/w or MVPA ≥150 min/w; 0. MPA <150 min/w and VPA <75 min/w and MVPA <150 min/w.<br>BMI: 1. <25 kg/m <sup>2</sup> ; 0. ≥25 kg/m <sup>2</sup> .<br>Diet (AHA, FFQ): 1. 4-5 components; 0. 0-3 components.<br>SBP/DBP: 1. <120 and 80 mmHg (not treated); 0. <120 and 80 mmHg (treated) or ≥120 or 80 mmHg.<br>FPG: 1. <100 mg/dl (not treated); 0. <100 mg/dl (treated) ≥100 mg/d.<br>TC: 1. <200 mg/dl (not treated); 0. or <200 mg/dl (treated) ≥200 mg/dl. | 8         |
| Dunkler-2016 <sup>91</sup> | Ongoing Telmisartan Alone and in Combination with Ramipril Global Endpoint Trial | International | NA (NA)                             | 68.10   | 55-NA (66.00)  | White 67.30<br>Asian 17.00 | NA                                      | type 2 diabetes mellitus patients | 6854        | How to identify all-cause mortality was not reported in the article.                                                                                | Smoking: 1. never smokers; 0.5. former smokers; 0. current smokers.<br>PA: 1. ≥once /d; 0.5. 2-6 times/w; 0. ≤once /w<br>BMI: 1. 23-30 kg/m <sup>2</sup> ; 0. <23 or >30 kg/m <sup>2</sup> .<br>Diet (AHEI, FFQ): 1. ≥28 points; 0.5. 21-28 points; 0. <21 points.<br>Social network score: 1. ≥25 points; 0.5. 13-24 points; 0. <13 points.                                                                                                                                                                                                                                              | 7         |
| Eguchi-                    | Japan                                                                            | Japan         | 1988-2009                           | 43.24   | 40-79          | Asian                      | 63.88                                   | general                           | 42647       | All-cause mortality                                                                                                                                 | Smoking: 1. not current smokers; 0.                                                                                                                                                                                                                                                                                                                                                                                                                                                                                                                                                       | 8         |

| Author-year                              | Cohort                       | Country | Follow-up duration (mean or median) | Men (%) | Age (mean)    | Ethnicity (%)*    | Proportion of high school graduates (%) | Health status      | Sample size | Outcome attainment                                                                                                | Definition of healthy lifestyle                                                                                                                                                                                                                                                                                                                                                                                                             | NOS score |
|------------------------------------------|------------------------------|---------|-------------------------------------|---------|---------------|-------------------|-----------------------------------------|--------------------|-------------|-------------------------------------------------------------------------------------------------------------------|---------------------------------------------------------------------------------------------------------------------------------------------------------------------------------------------------------------------------------------------------------------------------------------------------------------------------------------------------------------------------------------------------------------------------------------------|-----------|
| 2017 <sup>51</sup>                       | Collaborative Cohort Study   |         | (19.30)                             |         | (55.52)       | predominant       |                                         | population         |             | was determined by reviewing death certificates.                                                                   | current smokers.<br>Alcohol drinking: 1. <2 gou/d (46g ethanol/d); 0. ≥2 gou/d.<br>PA: 1. ≥0.5 h/d or ≥5 h/w; 0. <0.5 h/d and <5 h/w.<br>BMI: 1. 21-25 kg/m <sup>2</sup> ; 0. <21 kg/m <sup>2</sup> or >25 kg/m <sup>2</sup> .<br>Diet (fruit): 1. ≥1 servings/d; 0. <1 serving/d.<br>Diet (fish): 1. ≥1 servings/d; 0. <1 serving/d.<br>Diet (milk): 1. almost daily; 0. <once /d.<br>Sleeping: 1. 5.5-7.4 h/d; 0. <5.5 h/d or >7.4 h/d. ‡ |           |
| Emberson-2005 <sup>92</sup>              | British Regional Heart Study | UK      | 1978-2000 (NA)                      | 100     | 40-59 (49.20) | White predominant | NA                                      | general population | 6452        | All-cause mortality was identified through the National Health Service registers.                                 | Smoking: 1. never smokers; 0. ever smokers.<br>PA: 1. moderately vigorous or vigorous; 0. moderate, light, occasional or none PA.<br>BMI: 1. ≤25 kg/m <sup>2</sup> ; 0. >25 kg/m <sup>2</sup> .                                                                                                                                                                                                                                             | 7         |
| Fazel-Tabar Malekshah-2016 <sup>93</sup> | Golestan Cohort              | Iran    | 2004-2015 (8.08)                    | 42.75   | 40-75 (51.54) | White >75.59      | <31.10                                  | general population | 40708       | All-cause mortality was identified through active follow up and confirmed by verbal autopsy and extensive medical | Smoking: 1. never smokers; 0. ever smokers.<br>PA: 1. MVPA ≥30 min/d; 0. MVPA <30 min/d.<br>Diet (AHEI, FFQ): 1. highest 40%; 0. lower 60%.                                                                                                                                                                                                                                                                                                 | 8         |

| Author-year                    | Cohort                                                 | Country | Follow-up duration (mean or median) | Men (%) | Age (mean)    | Ethnicity (%) <sup>*</sup> | Proportion of high school graduates (%) | Health status      | Sample size | Outcome attainment                                                                 | Definition of healthy lifestyle                                                                                                                                                                                                                                                                                                                                                                                                                                 | NOS score |
|--------------------------------|--------------------------------------------------------|---------|-------------------------------------|---------|---------------|----------------------------|-----------------------------------------|--------------------|-------------|------------------------------------------------------------------------------------|-----------------------------------------------------------------------------------------------------------------------------------------------------------------------------------------------------------------------------------------------------------------------------------------------------------------------------------------------------------------------------------------------------------------------------------------------------------------|-----------|
| Ford-2011 <sup>45</sup>        | National Health and Nutrition Examination Surveys III  | US      | 1988-2006 (NA)                      | 46.75   | 17-NA (59.00) | White 81.10<br>Black 11.10 | 61.88                                   | general population | 16958       | documents.<br>All-cause mortality was identified through the National Death Index. | Smoking: 1. <100 cigarettes; 0. ≥100 cigarettes.<br>Alcohol drinking (M/F): 1. 0.1-59.9/29.9 drinks/m; 0. none or ≥60/30 drinks/m.<br>PA: 1. VPA ≥3 times/w or MPA ≥5 times/w; 0. VPA <3 times/w and MPA <5 times/w.<br>Diet (a single 24-h recall, HEI): 1. top 40%; 0. lower 60%.                                                                                                                                                                             | 8         |
| Ford-2012 (1) <sup>94</sup>    | National Health and Nutrition Examination Surveys 1999 | US      | 1999-2006 (5.80)                    | 47.69   | 20-NA (45.79) | White 72.22                | 52.90                                   | general population | 7622        | All-cause mortality was identified through the National Death Index.               | Smoking: 1. quitting >12 m or never smokers; 0. quitting ≤12 m or current smokers.<br>PA: 1. MVPA ≥150 min/w; 0. MVPA <150 min/w.<br>BMI: 1. <25 kg/m <sup>2</sup> ; 0. ≥25 kg/m <sup>2</sup> .<br>Diet (single 24-h recall, HEI): 1. ≥81 points; 0. <81 points.<br>TC: 1. <200 mg/dl (untreated); 0. <200 mg/dl (treated) or ≥200 mg/dl.<br>SBP/DBP: 1. <120 and 80 mmHg (untreated); 0. <120/80 mmHg (treated) or ≥120/80 mmHg.<br>HbA1c: 1. <5.7%; 0. ≥5.7%. | 8         |
| Ford-2012 (2) <sup>†, 95</sup> | National Health and                                    | US      | 1999-2006 (5.70)                    | 50.11   | 20-NA (45.60) | White 72.64<br>Black 19.15 | 52.90                                   | general population | 8375        | All-cause mortality was identified through the                                     | Smoking: 1. not current smokers; 0. current smokers.<br>PA: 1. MVPA ≥150 min/w; 0. MVPA                                                                                                                                                                                                                                                                                                                                                                         | 8         |

| Author-year                  | Cohort                                           | Country   | Follow-up duration (mean or median) | Men (%) | Age (mean)     | Ethnicity (%)* | Proportion of high school graduates (%) | Health status      | Sample size | Outcome attainment                                                                                                                         | Definition of healthy lifestyle                                                                                                                                                                                                                                                                                                                                                                                                                                                                                                                                                                                                                                                                                                  | NOS score |
|------------------------------|--------------------------------------------------|-----------|-------------------------------------|---------|----------------|----------------|-----------------------------------------|--------------------|-------------|--------------------------------------------------------------------------------------------------------------------------------------------|----------------------------------------------------------------------------------------------------------------------------------------------------------------------------------------------------------------------------------------------------------------------------------------------------------------------------------------------------------------------------------------------------------------------------------------------------------------------------------------------------------------------------------------------------------------------------------------------------------------------------------------------------------------------------------------------------------------------------------|-----------|
| Foster-2018 <sup>†, 96</sup> | Nutrition Examination Surveys 1999<br>UK Biobank | UK        | 2006-2016 (4.90)                    | 45.41   | 40-69 (55.71)  | White 94.79    | 46.10                                   | General population | 328594      | National Death Index.<br><br>Deaths were obtained from death certificates held by the NHS Information Centre and the NHS Central Register. | <150 min/w.<br>Diet (HEI, a single 24-h recall): 1. top 40%; 0. lower 60%.<br><br>Smoking: 1. not current smokers; 0. current smokers.<br>Alcohol drinking: 1. not consume (almost) daily; 0. consume (almost) daily.<br>PA: 1. MPA ≥150 min/w or VPA ≥75 min/w; 0. MPA <150 min/w and VPA <75 min/w.<br>Diet (fruits and vegetables, 24-h dietary recall): 1. ≥400 g/d; 0. <400 g/d.<br>Diet (oily fish, 24-h dietary recall): 1. ≥one portion/w; 0. <one portion/w.<br>Diet (red meat, 24-h dietary recall): 1. ≤3 portions/w; 0. >3 portions/w.<br>Diet (processed meat, 24-h dietary recall): 1. ≤1 portions/w; 0. >1 portions/w.<br>Television viewing: 1. <4 h/d; 0. ≥4 h/d.<br>Sleeping: 1. 7-9 h/d; 0. <7 h/d or >9 h/d. | 8         |
| Gopinath-2010 <sup>97</sup>  | Blue Mountains Eye Study                         | Australia | 1992-2007 (NA)                      | NA      | 49-NA (>62.51) | NA             | NA                                      | general population | 2283        | All-cause mortality was identified through the Australian National Death Index data.                                                       | Smoking: 1. not current smokers; 0. current smokers.<br>Alcohol drinking (M/F): 1. ≤21/14 units/w; 0. >21/14 units/w.<br>PA: 1. ≥3 episodes/w; 0. <3 episodes/w.<br>Diet (fruits and vegetables                                                                                                                                                                                                                                                                                                                                                                                                                                                                                                                                  | 8         |

| Author-year                 | Cohort                      | Country | Follow-up duration (mean or median) | Men (%) | Age (mean)    | Ethnicity (%)*             | Proportion of high school graduates (%) | Health status      | Sample size | Outcome attainment                                                                                  | Definition of healthy lifestyle                                                                                                                                                                                                                                                                                                                                                                                                                                                                                                                                                                                                                                                                                                                                                                                                                                                                                                                                                                    | NOS score |
|-----------------------------|-----------------------------|---------|-------------------------------------|---------|---------------|----------------------------|-----------------------------------------|--------------------|-------------|-----------------------------------------------------------------------------------------------------|----------------------------------------------------------------------------------------------------------------------------------------------------------------------------------------------------------------------------------------------------------------------------------------------------------------------------------------------------------------------------------------------------------------------------------------------------------------------------------------------------------------------------------------------------------------------------------------------------------------------------------------------------------------------------------------------------------------------------------------------------------------------------------------------------------------------------------------------------------------------------------------------------------------------------------------------------------------------------------------------------|-----------|
| Greenlee-2017 <sup>98</sup> | Cardiovascular Health Study | US      | 1989-2011 (15.00)                   | 38.56   | 65-98 (72.00) | White 86.71<br>Black 11.72 | 72.91                                   | general population | 3491        | All-cause mortality was identified from National Death Index and interviews with proxy respondents. | consumption): 1. $\geq 3$ episodes/d; 0. $< 3$ episodes/d.<br>ACS:<br>Smoking: 2. never smokers or quitting $> 1$ year; 1. quitting $\leq 1$ year; 0. current smokers.<br>Alcohol drinking (M/F): 2. non-drinker; 1. $< 2/1$ unit/d; 0. $> 2/1$ unit/d.<br>PA: 2. LTPA $\geq 8.75$ MET-h/w; 1. LTPA 0.10-8.74 MET-h/w; 0. zero MET-h/w.<br>BMI: 2. $< 25$ kg/m <sup>2</sup> at baseline and age 50; 1. 25-29.9 kg/m <sup>2</sup> at baseline and $< 30$ kg/m <sup>2</sup> at age 50, or 25-29.9 kg/m <sup>2</sup> at age 50 and $< 30$ kg/m <sup>2</sup> at baseline; 0. $\geq 30$ kg/m <sup>2</sup> either baseline, age 50, or both.<br>Diet (ACS, including vegetables and fruits, red and processed meats, and whole grains consumption, FFQ): 2. $\geq 6$ points; 1. 3-5 points; 0. $< 3$ points.<br>AHA:<br>Smoking: 2. never smokers or quitting $> 1$ year; 1. quitting $\leq 1$ year; 0. current smokers.<br>PA: 2. LTPA $\geq 8.75$ MET-h/w; 1. LTPA 0.10-8.74 MET-h/w; 0. zero MET-h/w. | 8         |

| Author-year               | Cohort                             | Country | Follow-up duration (mean or median) | Men (%) | Age (mean)    | Ethnicity (%)*    | Proportion of high school graduates (%) | Health status          | Sample size | Outcome attainment                                                                                | Definition of healthy lifestyle                                                                                                                                                                                                                                                                                                                                                                                                                                                                                             | NOS score |
|---------------------------|------------------------------------|---------|-------------------------------------|---------|---------------|-------------------|-----------------------------------------|------------------------|-------------|---------------------------------------------------------------------------------------------------|-----------------------------------------------------------------------------------------------------------------------------------------------------------------------------------------------------------------------------------------------------------------------------------------------------------------------------------------------------------------------------------------------------------------------------------------------------------------------------------------------------------------------------|-----------|
|                           |                                    |         |                                     |         |               |                   |                                         |                        |             |                                                                                                   | BMI: 2. <25 kg/m <sup>2</sup> ; 1. 25-29.9 kg/m <sup>2</sup> ; 0. ≥30 kg/m <sup>2</sup> .<br>Diet (AHA, FFQ): 2. 4-5 components; 1. 2-3 components; 0. 0-1 components.<br>SBP/DBP: 2. <120 and 80 mmHg (untreated); 1. 120-139 or 80-89 mmHg (untreated) or <120 and 80 mmHg (treated); 0. ≥140 or 90 mmHg.<br>FPG: 2. <100 mg/dl (untreated); 1. 100-125 mg/dl (untreated) or <100 mg/dl (treated); 0. ≥126 mg/dl.<br>TC: 2. <200 mg/dl (untreated); 1. 200-239 mg/dl (untreated) or <200 mg/dl (treated); 0. ≥ 240 mg/dl. |           |
| Hamer-2011 <sup>99</sup>  | National Diet and Nutrition Survey | UK      | NA-2008 (9.20)                      | 50.75   | 65-99 (76.50) | White predominant | NA                                      | general population     | 1062        | All-cause mortality was identified through National Health Service administrative mortality data. | Smoking: 1. never smokers; 0. ever smokers.<br>Alcohol drinking (M/F): 1. 1-21/14 units/w; 0. zero or >21/14 units/w.<br>PA: 1. regular moderate to vigorous PA; 0. irregular or no moderate to vigorous PA.<br>Diet (daily Vitamin C intake): 1. ≥50 mU; 0. <50 mU.                                                                                                                                                                                                                                                        | 8         |
| Heitz-2017 <sup>100</sup> | 4-Corners Women                    | US      | 1999-2009 (NA)                      | 0       | 25-79 (55.21) | White 100         | 88.17                                   | invasive breast cancer | 837         | All-cause mortality was identified through the                                                    | Smoking: 2. never smokers; 1. former smokers; 0. current smokers.<br>Alcohol drinking: 2. ≤0.5 drinks/d; 1.                                                                                                                                                                                                                                                                                                                                                                                                                 | 7         |

| Author-year                    | Cohort                    | Country | Follow-up duration (mean or median) | Men (%) | Age (mean)    | Ethnicity (%)*    | Proportion of high school graduates (%) | Health status   | Sample size | Outcome attainment                                                                                                                                                | Definition of healthy lifestyle                                                                                                                                                                                                                                                                                                                                                                                                                                                                    | NOS score |
|--------------------------------|---------------------------|---------|-------------------------------------|---------|---------------|-------------------|-----------------------------------------|-----------------|-------------|-------------------------------------------------------------------------------------------------------------------------------------------------------------------|----------------------------------------------------------------------------------------------------------------------------------------------------------------------------------------------------------------------------------------------------------------------------------------------------------------------------------------------------------------------------------------------------------------------------------------------------------------------------------------------------|-----------|
|                                | Health Study              |         |                                     |         |               |                   |                                         | patients        |             | National Death Index.                                                                                                                                             | 0.5-1 drinks/d; 0. >1 drinks/d.<br>PA: 2. VPA >75 min/w; 1. VPA ≤75 min/w; 0. none VPA.<br>BMI: 2. <25 kg/m <sup>2</sup> ; 1. 25-30 kg/m <sup>2</sup> ; 0. ≥30 kg/m <sup>2</sup> .<br>WHR: 2. <0.775; 1. 0.775-0.84; 0. ≥0.84.<br>Diet (score consisting of dairy fat, refined grains, snacks, gravies and sauces, potatoes, bacon, beef, sugary drinks and desserts, prepared foods, fast foods, and fresh fruits and vegetables): 2. lowest tertile; 1. medium tertile; 0. highest tertile.      |           |
| Inoue-Choi-2013 <sup>101</sup> | Iowa Women's Health Study | US      | 2004-2009 (5.40)                    | 0       | 73-87 (78.90) | White predominant | 86.10                                   | cancer patients | 2017        | All-cause mortality was identified through the State Health Registry of Iowa, supplemented with the National Death Index (National Center for Health Statistics). | Alcohol drinking: 1. ≤10.0 g/d; 0.5. 10.1-20.0 g/d; 0. >20.0 g/d.<br>PA: 1. ≥30.0 min/d; 0.5. 0.1-29.9 min/d; 0. none.<br>BMI: 1. 18.5-24.9 kg/m <sup>2</sup> ; 0.5. 25.0-29.9 kg/m <sup>2</sup> ; 0. ≥30.0 kg/m <sup>2</sup> .<br>Diet (SSB, FFQ): 1. zero g/d; 0.5. <250 g/d; 0. ≥250 g/d.<br>Diet (fruit and vegetable, FFQ): 1. ≥5 servings/d; 0.5. 3-4 servings/d; 0. <3 servings/d.<br>Diet (DF, FFQ): 1. ≥25.0 g/d; 0.5. 12.5-24.9 g/d; 0. <12.5 g/d.<br>Diet (red meat and processed meat, | 8         |



| Author-year                 | Cohort                                                           | Country | Follow-up duration (mean or median) | Men (%) | Age (mean)    | Ethnicity (%)*    | Proportion of high school graduates (%) | Health status      | Sample size | Outcome attainment                                                                                                                                                   | Definition of healthy lifestyle                                                                                                                                                                                                                                                                                                                                                                                                                              | NOS score |
|-----------------------------|------------------------------------------------------------------|---------|-------------------------------------|---------|---------------|-------------------|-----------------------------------------|--------------------|-------------|----------------------------------------------------------------------------------------------------------------------------------------------------------------------|--------------------------------------------------------------------------------------------------------------------------------------------------------------------------------------------------------------------------------------------------------------------------------------------------------------------------------------------------------------------------------------------------------------------------------------------------------------|-----------|
| Iversen-2010 <sup>102</sup> | Royal College of General Practitioners' Oral Contraception Study | UK      | 1994-2006 (11.81)                   | 0       | 42-81 (56.10) | White 96.00       | NA                                      | general population | 7603        | All-cause mortality was identified through the Oral Contraception Study database                                                                                     | FFQ: 1. <500 g/d and <3 g/d; 0.5. <500 g/d and 3-49 g/d; 0. ≥500 g/d or ≥50 g/d.<br>Diet (sodium, FFQ): 1. ≤1500 mg/d; 0.5. 1501-2400 mg/d; 0. >2400 mg/d.<br>Smoking 1. never smoking; 0. ever smoking.<br>Alcohol drinking: 1. 0.1-6.9 units/w; 0. none or ≥7.0 units/w.<br>PA: 1. >28 h/w; 0. ≤28 h/w.<br>BMI: 1. 18.50-24.99 kg/m <sup>2</sup> ; 0. <18.50 kg/m <sup>2</sup> or ≥25.00 kg/m <sup>2</sup> .                                               | 8         |
| Jin-2017 <sup>103</sup>     | InCHIA NTI study                                                 | Italy   | 1998-2010 (9.10)                    | 45.00   | 65-95 (74.00) | White predominant | <45.92                                  | general population | 928         | All-cause mortality was identified through Tuscany Region Mortality General Registry and death certificates at the registry office of the municipality of residence. | Smoking: 2. never smokers; 1. former smokers; 0. current smokers.<br>PA: 2. light exercise ≥4 h/w, moderate exercise ≥1-2 h/w, or intense exercise many times/w; 1. light exercise 2-4 h/w; 0. inactive or with some walking.<br>BMI: 2. <25 kg/m <sup>2</sup> ; 1. 25-29.9 kg/m <sup>2</sup> ; 0. ≥30 kg/m <sup>2</sup> .<br>Diet (MDS, FFQ): 2. 6-9 points; 1. 4-5 points; 0. 0-3 points.<br>SBP/DBP: 2. <120 and 80 mmHg (untreated); 1. 120-139 or 80-89 | 9         |

| Author-year                    | Cohort                                                               | Country     | Follow-up duration (mean or median) | Men (%) | Age (mean)       | Ethnicity (%)*    | Proportion of high school graduates (%) | Health status      | Sample size | Outcome attainment                                                                                   | Definition of healthy lifestyle                                                                                                                                                                                                                                                                                                                                                                                                                                                                                                                             | NOS score |
|--------------------------------|----------------------------------------------------------------------|-------------|-------------------------------------|---------|------------------|-------------------|-----------------------------------------|--------------------|-------------|------------------------------------------------------------------------------------------------------|-------------------------------------------------------------------------------------------------------------------------------------------------------------------------------------------------------------------------------------------------------------------------------------------------------------------------------------------------------------------------------------------------------------------------------------------------------------------------------------------------------------------------------------------------------------|-----------|
| Khaw-2008 <sup>†</sup> ,<br>63 | European Prospective Investigation into Cancer and Nutrition-Norfolk | UK          | 1993-2006<br>(11.00)                | 45.35   | 45-79<br>(58.13) | White 99.50       | 53.38                                   | general population | 20244       | All-cause mortality was identified through death certification at the Office of National Statistics. | mmHg (untreated) or <120 and 80 mmHg (treated); 0. ≥140 or 90 mmHg.<br>FPG: 2. <100 mg/dl (untreated); 1. 100-125 mg/dl (untreated) or <100 mg/dl (treated); 0. ≥126 mg/dl.<br>TC: 2. <200 mg/dl (untreated); 1. 200-239 mg/dl (untreated) or <200 mg/dl (treated); 0. ≥ 240 mg/dl.<br>Smoking: 1. not current smokers; 0. current smokers.<br>Alcohol drinking: 1. 1-14 units/w (1 unit≈8 g alcohol); 0. none or >14 units/w.<br>PA: 1. LTPA ≥0.5 h/d; 0. LTPA <0.5 h/d.<br>Diet (plant food intake, blood Vitamin C level): 1. ≥50 mmol/l; 0. <50 mmol/l. | 9         |
| Kim-2013 <sup>104</sup>        | Seoul Male Cohort Study                                              | South Korea | 1993-2011<br>(18.40)                | 100     | 40-59<br>(47.53) | Asian predominant | >53.73                                  | general population | 12538       | All-cause mortality was identified through the National Statistics Office.                           | Smoking: 1. never smokers; 0. ever smokers.<br>PA: 1. MPA ≥150 min/w, VPA ≥75 min/w, or MVPA ≥150 min/w; 0. MPA <150 min/w, MVPA <150 min/w, and VPA <75 min/w.<br>BMI: 1. 23.1-24.9 kg/m <sup>2</sup> ; 0. ≥25 kg/m <sup>2</sup> .<br>Diet (Korean dietary pattern, FFQ):                                                                                                                                                                                                                                                                                  | 9         |

| Author-year                     | Cohort                                                | Country | Follow-up duration (mean or median) | Men (%) | Age (mean)    | Ethnicity (%) <sup>*</sup> | Proportion of high school graduates (%) | Health status                                                                                          | Sample size | Outcome attainment                                              | Definition of healthy lifestyle                                                                                                                                                                                                                                                                                                                                                                                                                                                                                                                                                                                                                                                                                                                                     | NOS score |
|---------------------------------|-------------------------------------------------------|---------|-------------------------------------|---------|---------------|----------------------------|-----------------------------------------|--------------------------------------------------------------------------------------------------------|-------------|-----------------------------------------------------------------|---------------------------------------------------------------------------------------------------------------------------------------------------------------------------------------------------------------------------------------------------------------------------------------------------------------------------------------------------------------------------------------------------------------------------------------------------------------------------------------------------------------------------------------------------------------------------------------------------------------------------------------------------------------------------------------------------------------------------------------------------------------------|-----------|
| King-2013 <sup>†</sup> ,<br>105 | National Health and Nutrition Examination Surveys III | US      | 1988-2006 (NA)                      | 18.50   | 21-NA (NA)    | White 81.10<br>Black 11.10 | 61.88                                   | population with normal blood pressure, low-density lipoprotein cholesterol or C-reactive protein level | 11481       | All-cause mortality was determined by the National Death Index. | 1. $\geq 2$ points; 0. $< 2$ points.<br>SBP/DBP: 1. $< 120$ and $80$ mmHg (without medication); 0. $\geq 120$ or $80$ mmHg, or $< 120$ and $80$ mmHg (with medication).<br>FBG: 1. $< 100$ mg/dl (without medication); 0. $\geq 100$ mg/d, or $< 100$ mg/dl (with medication).<br>TC: 1. $< 200$ mg/dl (without medication); 0. $\geq 200$ mg/dl, or $< 200$ mg/dl (with medication).<br>Smoking: 1. not current smokers; 0. current smokers.<br>Alcohol drinking (M/F): 1. $0.1-2/1$ drinks/d; 0. none or $> 2/1$ drinks/d.<br>PA: 1. $> 12$ times/m; 0. $\leq 12$ times/m.<br>BMI: 1. $18.5-29.9$ kg/m <sup>2</sup> ; 0. $< 18.5$ kg/m <sup>2</sup> or $\geq 30$ kg/m <sup>2</sup> .<br>Diet (fruit and vegetables): 1. $\geq 5$ servings/d; 0. $< 5$ servings/d. | 7         |
| Knoops-2004 <sup>106</sup>      | Healthy Ageing: a Longitudinal                        | Europe  | 1988-2000 (10.00)                   | 64.43   | 70-90 (74.24) | White predominant          | $< 66.86$                               | general population                                                                                     | 2339        | The identification of all-cause mortality was not reported.     | Smoking: 1. never smokers or quitting $> 15$ years; 0. quitting $\leq 15$ years or current smokers.<br>Alcohol drinking: 1. $> 0$ g/d; 0. none.                                                                                                                                                                                                                                                                                                                                                                                                                                                                                                                                                                                                                     | 8         |

| Author-year                  | Cohort                      | Country | Follow-up duration (mean or median) | Men (%) | Age (mean)    | Ethnicity (%)*    | Proportion of high school graduates (%) | Health status      | Sample size | Outcome attainment                                                                                                                                                                                                                                                                                                                                 | Definition of healthy lifestyle                                                                                                                                                                                                                                                                                                                                                                                                                                                 | NOS score |
|------------------------------|-----------------------------|---------|-------------------------------------|---------|---------------|-------------------|-----------------------------------------|--------------------|-------------|----------------------------------------------------------------------------------------------------------------------------------------------------------------------------------------------------------------------------------------------------------------------------------------------------------------------------------------------------|---------------------------------------------------------------------------------------------------------------------------------------------------------------------------------------------------------------------------------------------------------------------------------------------------------------------------------------------------------------------------------------------------------------------------------------------------------------------------------|-----------|
|                              | inal study in Europe        |         |                                     |         |               |                   |                                         |                    |             |                                                                                                                                                                                                                                                                                                                                                    | PA (Voorrips or Morris questionnaire): 1. the intermediate and the highest tertile; 0. the lowest tertile.<br>Diet (mMDS, dietary history method): 1. $\geq 4$ points; 0. $< 4$ points.                                                                                                                                                                                                                                                                                         |           |
| Krokstad-2017 <sup>107</sup> | Nord-Trøndelag Health Study | Norway  | 1995-2010 (14.10)                   | 47.00   | 20-69 (43.60) | White predominant | 73.41                                   | general population | 37785       | All-cause mortality was identified through Norwegian Causes of Death Registry. Cardio-metabolic diseases (including diseases of the circulatory system, and endocrine, nutritional and metabolic disease; ICD-9, 240-279, and 390-459; ICD-10, E10-E16, E65-E68, and I00-I99) mortality was identified through Norwegian Causes of Death Registry. | Smoking: 1. not current smokers; 0. current smokers.<br>Drinking (Cut-Annoyed-Guilty-Eyeopener questionnaire): 1. $< 2$ points; 0. $\geq 2$ points.<br>PA: 1. LPA $\geq 3$ h/w, or LPA $\geq 1$ h/w and VPA $\geq 1$ h/w; 0. LPA $< 1$ h/w or VPA $< 1$ h/w, or LPA $< 3$ h/w.<br>Sedentary behavior: 1. $> 7$ h/d; 0. $\leq 7$ h/d.<br>Sleeping: 1. 6.1-9.9 h/d; 0. $\leq 6.0$ h/d or $\geq 10.0$ h/d.<br>Social participation: 1. often; 0. never or only a few times a year. | 8         |
| Kvaavik-2010 <sup>108</sup>  | Health and                  | UK      | 1985-2005 (20.00)                   | 51.35   | 18-NA (43.70) | White 98.00       | NA                                      | general population | 4886        | All-cause mortality was ascertained                                                                                                                                                                                                                                                                                                                | Smoking: 1. not current smokers; 0. current smokers.                                                                                                                                                                                                                                                                                                                                                                                                                            | 8         |

| Author-year                 | Cohort                                             | Country | Follow-up duration (mean or median) | Men (%) | Age (mean)          | Ethnicity (%)*    | Proportion of high school graduates (%) | Health status                                | Sample size | Outcome attainment                                                                                                                  | Definition of healthy lifestyle                                                                                                                                                                                             | NOS score |
|-----------------------------|----------------------------------------------------|---------|-------------------------------------|---------|---------------------|-------------------|-----------------------------------------|----------------------------------------------|-------------|-------------------------------------------------------------------------------------------------------------------------------------|-----------------------------------------------------------------------------------------------------------------------------------------------------------------------------------------------------------------------------|-----------|
|                             | Lifestyle Survey                                   |         |                                     |         |                     |                   |                                         |                                              |             | from death certificates.                                                                                                            | Alcohol drinking (M/F): 1. ≤21/14 units/w; 0. >21/14 units/w.<br>PA: 1. ≥120 min/w; 0. <120 min/w.<br>Diet (fruits and vegetables consumption, FFQ): 1. ≥3 times/d; 0. <3 times/d.                                          |           |
| Larsson-2017 <sup>109</sup> | Cohort of Swedish Men & Swedish Mammography Cohort | Sweden  | 1998-2014 (15.49)                   | 52.20   | 45-83 (59.92)       | White predominant | >18.49                                  | general population                           | 64093       | All-cause mortality was identified through the Swedish Cause of Death Register                                                      | Smoking: 1. not current smokers; 0. current smokers.<br>Alcohol drinking: 1. 0-14 drinks/w; 0. >14 drinks/w.<br>PA: 1. ≥150 min/w; 0. <150 min/w.<br>Diet (DASH score, FFQ): 1. above the median (22); 0. below the median. | 9         |
| Lee-2009 <sup>110</sup>     | Aerobics Center Longitudinal Study                 | US      | 1971-2003 (14.70)                   | 100     | 30-79 (44.13)       | White >95.00      | >70.00                                  | general population                           | 23657       | All-cause mortality was identified through the National Death Index and official death certificates.                                | Smoking: 1. never smoking; 0. ever smoking.<br>Fitness (CRF): 1. higher 80%; 0. lower 20%.<br>WC: 1. <94 cm; 0. ≥94 cm.                                                                                                     | 7         |
| Leger-2018 <sup>111</sup>   | "Fred Hutchinson Cancer Research Center Study"     | US      | 2010-2016 (NA)                      | 46.74   | 20.20-83.30 (55.90) | White 89.15       | NA                                      | hematopoietic cell transplantation survivors | 2198        | All-cause mortality was identified through annual contact with patients and families, referring providers, and periodic searches of | Smoking: 1. not a non-current smokers; 0. current smokers.<br>PA: 1. VPA ≥75 min/w or MPA ≥150 min/w; 0. VPA <75 min/w and MPA <150 min/w.<br>Diet (fruit/vegetable intake): 1. ≥5 servings/d; 0. <5 servings/d.            | 6         |

| Author-year                | Cohort                                                      | Country | Follow-up duration (mean or median) | Men (%) | Age (mean)    | Ethnicity (%)*             | Proportion of high school graduates (%) | Health status                     | Sample size | Outcome attainment                                                                                                                                                                                    | Definition of healthy lifestyle                                                                                                                                                                                                                                                                                                                            | NOS score |
|----------------------------|-------------------------------------------------------------|---------|-------------------------------------|---------|---------------|----------------------------|-----------------------------------------|-----------------------------------|-------------|-------------------------------------------------------------------------------------------------------------------------------------------------------------------------------------------------------|------------------------------------------------------------------------------------------------------------------------------------------------------------------------------------------------------------------------------------------------------------------------------------------------------------------------------------------------------------|-----------|
| Li-2018 <sup>1</sup>       | Nurses' Health Study & Health Professionals Follow-Up Study | US      | 1980-2014 (27.20-33.90)             | 36.00   | 34-75 (48.96) | White 96.34                | Predominant                             | general population                | 123219      | public sources for patients without recent contact. All-cause mortality was identified from state vital statistics records, the National Death Index, reports by the families, and the postal system. | Smoking: 1. never smokers; 0. ever smokers.<br>Alcohol drinking (M/F): 1. 5-30/15 g/d; 0. <5 g/d or >30/15 g/d.<br>MVPA: 1. >30 min/d; 0. ≤30 min/d.<br>BMI: 1. 18.5-24.9 kg/m <sup>2</sup> ; 0. <18.5 kg/m <sup>2</sup> or ≥25 kg/m <sup>2</sup> .<br>Diet (AHEI, FFQ): 1. top 40% of each cohort distribution; 0. lower 60% of each cohort distribution. | 8         |
| Lin-2012 <sup>112</sup>    | Taichung Diabetes Study                                     | China   | 2002-2008 (4.02)                    | 51.93   | 30-NA (58.51) | Asian predominant          | NA                                      | type 2 diabetes mellitus patients | 5686        | All-cause mortality was identified through the Taiwan National Death Index.                                                                                                                           | Smoking: 1. never smokers; 0. ever smokers.<br>Alcohol drinking: 1. abstainer; 0. drinker.<br>PA: 1. ≥once /w for >1 m continuously; 0. <once /w or <1 m continuously.<br>Diet (carbohydrate intake, 24-h food diary): 1. <65%E; 0. ≥65%E.                                                                                                                 | 7         |
| Lin-2015 <sup>†, 113</sup> | National Health and Nutrition Examination                   | US      | 1988-2006 (8.17)                    | 48.60   | 18-NA (NA)    | White 81.10<br>Black 11.10 | 61.88                                   | stroke patients                   | 420         | All-cause mortality was identified through the National Death Index.                                                                                                                                  | Smoking: 1. never smokers; 1. ever smokers.<br>PA: 1. MVPA ≥150 min/w; 1. MVPA <150 min/w.<br>BMI: 1. <25 kg/m <sup>2</sup> ; 0. ≥25 kg/m <sup>2</sup> .<br>Diet (HEI, FFQ): 1. >80 points; 0.                                                                                                                                                             | 8         |

| Author-year                  | Cohort        | Country | Follow-up duration (mean or median) | Men (%) | Age (mean)    | Ethnicity (%)*    | Proportion of high school graduates (%) | Health status      | Sample size | Outcome attainment                                                                                                                                           | Definition of healthy lifestyle                                                                                                                                                                                                                                                                                                                                               | NOS score |
|------------------------------|---------------|---------|-------------------------------------|---------|---------------|-------------------|-----------------------------------------|--------------------|-------------|--------------------------------------------------------------------------------------------------------------------------------------------------------------|-------------------------------------------------------------------------------------------------------------------------------------------------------------------------------------------------------------------------------------------------------------------------------------------------------------------------------------------------------------------------------|-----------|
|                              | Surveys III   |         |                                     |         |               |                   |                                         |                    |             |                                                                                                                                                              | <p>≤80 points.</p> <p>SBP/DBP: 1. &lt;120 and 80 mmHg (untreated); 0. ≥120 or 80 mmHg or &lt;120 and 80 mmHg (treated).</p> <p>HbA1c: 1. &lt;5.7% (untreated); 0. ≥5.7% or &lt;5.7% (treated).</p> <p>TC: 1. &lt;200 mg/dl (untreated); 0. ≥200 mg/dl or &lt;200 mg/dl (treated).</p>                                                                                         |           |
| Lingfors-2019 <sup>114</sup> | "Habo study"  | Sweden  | 1985-2013 (>22.23)                  | 100     | 33-42 (<42)   | White predominant | 20.00                                   | General population | 635         | All-cause mortality data from the register of patients treated in hospitals and causes of mortality were also available.                                     | <p>Smoking: 4. not current smokers; 0. current smokers.</p> <p>Alcohol drinking: 2. ≤109 g spirits/w; 0. &gt;109 g spirits/w.</p> <p>PA: 2. high level; 0. low-to-moderate level.</p> <p>Diet (a weighted score consisting of consumption of vegetables, fine white bread, coarse fiber-rich bread, and visible fat, 4-item questionnaire): 3. 5–7 points; 0. 0–4 points.</p> | 8         |
| Liu-2014 <sup>115</sup>      | Kailuan Study | China   | 2006-2010 (4.02)                    | 79.75   | 18-98 (51.46) | Asian predominant | >6.91                                   | general population | 95429       | All-cause mortality was ascertained by discharge lists from local hospitals and death certificates from state vital statistics offices and active follow-up. | <p>Smoking: 1. never smokers; 0. ever smokers;</p> <p>PA: 1. MVPA ≥80 min/w; 0. MVPA &lt;80 min/w.</p> <p>BMI: 1. &lt;25 kg/m<sup>2</sup>; 0. ≥25 kg/m<sup>2</sup>.</p> <p>Diet (salt intake): 1. low salt intake; 0. intermediate and high salt intake.</p> <p>SBP/DBP: 1. &lt;120 and 80 mmHg</p>                                                                           | 8         |

| Author-year          | Cohort                                                                                                   | Country     | Follow-up duration (mean or median) | Men (%) | Age (mean)    | Ethnicity (%)*    | Proportion of high school graduates (%) | Health status      | Sample size | Outcome attainment                                                    | Definition of healthy lifestyle                                                                                                                                                                                                                                                                                                                                                                                                                                                                                                                                                                                                                                                                                                                                                                                                                                                                                                                                                                    | NOS score |
|----------------------|----------------------------------------------------------------------------------------------------------|-------------|-------------------------------------|---------|---------------|-------------------|-----------------------------------------|--------------------|-------------|-----------------------------------------------------------------------|----------------------------------------------------------------------------------------------------------------------------------------------------------------------------------------------------------------------------------------------------------------------------------------------------------------------------------------------------------------------------------------------------------------------------------------------------------------------------------------------------------------------------------------------------------------------------------------------------------------------------------------------------------------------------------------------------------------------------------------------------------------------------------------------------------------------------------------------------------------------------------------------------------------------------------------------------------------------------------------------------|-----------|
| Lohse-2016<br>†, 116 | MONITORING trends and determinants of Cardiovascular disease-Switzerland & National Research Programme1A | Switzerland | 1977-NA (21.70)                     | 50.60   | 25-74 (46.06) | White predominant | 58.85                                   | general population | 16722       | All-cause mortality was identified through the Swiss National Cohort. | (not treated); 0. <120 and 80 mmHg (treated) or ≥120 or 80 mmHg.<br>FPG: 1. <100 mg/dl (not treated); 0. <100 mg/dl (treated) ≥100 mg/d.<br>TC: 1. <200 mg/dl (not treated); 0. or <200 mg/dl (treated) ≥200 mg/dl.<br>Alcohol drinking: 1. didn't drink yesterday; 0. drank yesterday.<br>PA (MPA ≥60 min/d or VPA ≥30 min/d): 1. ≥2 d/w; 0.5. one d/w; 0. <1 d/w.<br>Sedentary behavior: 1. regular exercise or exhausting; 0.5. walking, cycling, other regular activities such as gardening, or average; 0. mostly sitting or sedentary.<br>BMI: 1. 18.5-24.9 kg/m <sup>2</sup> ; 0.5. 25-29.9 kg/m <sup>2</sup> ; 0. <18.5 kg/m <sup>2</sup> or ≥30 kg/m <sup>2</sup> .<br>Diet (energy density, score consisting of fat for cooking, bread, or salad, cut away fat from meat, and sweets/chocolate): 1. 2-3 points; 0.5. one point; 0. zero points.<br>Diet (fruits and vegetables): 1. yesterday consume both fruits and vegetables; 0.5. yesterday consume either fruits or vegetables; 0. | 9         |



| Author-year              | Cohort                                                                             | Country     | Follow-up duration (mean or median) | Men (%) | Age (mean) | Ethnicity (%)* | Proportion of high school graduates (%) | Health status                               | Sample size | Outcome attainment                                                                                                                 | Definition of healthy lifestyle                                                                                                                                                                                                                                                                                                                                                                                                                                                                                                                                                                                                                                                                                                                                                                                                                                                                                                                                                                                                                                                                   | NOS score |
|--------------------------|------------------------------------------------------------------------------------|-------------|-------------------------------------|---------|------------|----------------|-----------------------------------------|---------------------------------------------|-------------|------------------------------------------------------------------------------------------------------------------------------------|---------------------------------------------------------------------------------------------------------------------------------------------------------------------------------------------------------------------------------------------------------------------------------------------------------------------------------------------------------------------------------------------------------------------------------------------------------------------------------------------------------------------------------------------------------------------------------------------------------------------------------------------------------------------------------------------------------------------------------------------------------------------------------------------------------------------------------------------------------------------------------------------------------------------------------------------------------------------------------------------------------------------------------------------------------------------------------------------------|-----------|
| Maron-2018 <sup>60</sup> | Clinical Outcomes Utilizing Revascularization and Aggressive Drug Evaluation trial | Canada & US | NA (6.80)                           | 85.54   | NA (62.11) | White 86.58    | NA                                      | Patients with stable ischemic heart disease | 2102        | All-cause mortality was determined using the National Death Index and the Department of Veterans Affairs Corporate Data Warehouse. | <p>yesterday consume no fruits and vegetables.</p> <p>Diet (grains): 1. consume yesterday; 0. no yesterday.</p> <p>Diet (processed meat): 1. didn't consume yesterday; 0.5. consume meat yesterday; 0. consume sausage products yesterday.</p> <p>Diet (salt): 1. never adding salt; 0.5. sometimes adding salt; 0. always adding salt.</p> <p>Smoking: 1. not smoking; 0. smoking.</p> <p>PA: 1. MPA <math>\geq</math>150 min/w; 0. MPA &lt;150 min/w.</p> <p>BMI: 1. &lt;25 kg/m<sup>2</sup> or <math>\geq</math>10% weight loss if baseline BMI &gt;27.5 kg/m<sup>2</sup>; 0. <math>\geq</math>25 kg/m<sup>2</sup> or &lt;10% weight loss if baseline BMI &gt;27.5 kg/m<sup>2</sup>.</p> <p>Diet (American Heart Association Step 2 diet, questionnaire): 1. &lt;30% of calories from fat, &lt;7% of calories from saturated fat, and &lt;200 mg/day of dietary cholesterol; 0. <math>\geq</math>30% of calories from fat, <math>\geq</math>7% of calories from saturated fat, or <math>\geq</math>200 mg/day of dietary cholesterol.</p> <p>SBP: 1. &lt;130 mmHg; 0. <math>\geq</math>130</p> | 9         |

| Author-year                           | Cohort                                                                                                    | Country     | Follow-up duration (mean or median) | Men (%) | Age (mean)    | Ethnicity (%)*    | Proportion of high school graduates (%) | Health status      | Sample size | Outcome attainment                                                    | Definition of healthy lifestyle                                                                                                                                                                                                                                                                                                                           | NOS score |
|---------------------------------------|-----------------------------------------------------------------------------------------------------------|-------------|-------------------------------------|---------|---------------|-------------------|-----------------------------------------|--------------------|-------------|-----------------------------------------------------------------------|-----------------------------------------------------------------------------------------------------------------------------------------------------------------------------------------------------------------------------------------------------------------------------------------------------------------------------------------------------------|-----------|
| Martin-Diener-2014 <sup>117</sup>     | MONITORing trends and determinants of Cardiovascular disease-Switzerland & National Research Program meIA | Switzerland | 1977-2008 (21.35)                   | 48.60   | 16-90 (45.10) | White predominant | <65.77                                  | general population | 16721       | All-cause mortality was identified through the Swiss National Cohort. | mmHg;<br>LDLC: 1. <85 mg/dl; 0. ≥85 mg/dl.<br>Smoking: 1. not current smokers; 0. current smokers.<br>Alcohol drinking (M/F): 1. <40/20 g/d; 0. >40/20 g/d.<br>PA: 1. frequent walking or cycling, other frequent activities such as gardening, or regular VPA; 0. light PA, mostly sedentary.<br>Diet (fruit intake on the previous day): 1. yes; 0. no. | 8         |
| Martínez-González-2013 <sup>118</sup> | "Spanish national prospective cohort study"                                                               | Spain       | 2000-2011 (9.00)                    | 43.98   | 60-NA (71.77) | White 100         | <13.16                                  | general population | 3465        | All-cause mortality was identified through the National Death Index.  | 6-point score:<br>Smoking: 1. never smokers or quitting >15 years; 0. current smokers or quitting ≤15 years.<br>PA: 1. very or moderately physically active compared with their age-peers; 0. less active or inactive compared with their age-peers.<br>Sedentary behavior: 1. <8 h/d; 0. ≥8 h/d.<br>Diet (score consisting of fruits,                    | 8         |

| Author-year                    | Cohort                                      | Country | Follow-up duration (mean or median) | Men (%) | Age (mean)    | Ethnicity (%)*             | Proportion of high school graduates (%) | Health status       | Sample size | Outcome attainment                                                                    | Definition of healthy lifestyle                                                                                                                                                                                                                                                                                                                                                                                                                                                                                                                                                                                                                                                                                                                                                                                                                                         | NOS score |
|--------------------------------|---------------------------------------------|---------|-------------------------------------|---------|---------------|----------------------------|-----------------------------------------|---------------------|-------------|---------------------------------------------------------------------------------------|-------------------------------------------------------------------------------------------------------------------------------------------------------------------------------------------------------------------------------------------------------------------------------------------------------------------------------------------------------------------------------------------------------------------------------------------------------------------------------------------------------------------------------------------------------------------------------------------------------------------------------------------------------------------------------------------------------------------------------------------------------------------------------------------------------------------------------------------------------------------------|-----------|
| McCullough-2011 <sup>119</sup> | Cancer Prevention Study-II Nutrition Cohort | US      | 1992-2006 (13.07)                   | 45.31   | 50-74 (62.67) | White 97.99                | 92.66                                   | current non-smokers | 111966      | All-cause mortality was identified through National Death Index.                      | vegetables, whole grain, vegetable fats, fish, red or processed meat, and animal fats consumption, FFQ); 1. $\geq$ median (4 points); 0. <median. Sleeping: 1. 7-8 h/d; 0. <7 h/d or >8 h/d. Social interaction with friends: 1. daily; 0. less than daily. 3-point score: smoking, PA and diet. Alcohol drinking (M/F): 2. 0.1-2/1 drinks/d; 1. none; 0. >2/1 drinks/d. PA: 2. $\geq$ 17.5 MET-h/w; 1. 8.75-17.4 MET-h/w; 0. <8.75 MET-h/w. BMI: 2. 18.5-24.9 kg/m <sup>2</sup> at both time points; 1. 25-30 kg/m <sup>2</sup> at both time points, or 18.5-24.9 kg/m <sup>2</sup> at one time point and $\geq$ 25 kg/m <sup>2</sup> at another time point; 0. >30 kg/m <sup>2</sup> at both time points, or >30 kg/m <sup>2</sup> at one time point and 25-30 kg/m <sup>2</sup> at another time point. Diet (ACS, FFQ): 2. 7-9 points; 1. 3-6 points; 0. 0-2 points. | 7         |
| Meng-1999 <sup>120</sup>       | "Hawaii Department of Health survey"        | US      | 1975-1994 (15.61)                   | 49.50   | 18-NA (44.81) | White 31.06<br>Asian 62.61 | NA                                      | general population  | 31700       | All-cause mortality was identified through the mortality files from the Department of | Smoking: 4. never smokers; 3. former smokers; 2. current smokers $\leq$ 1 ppd; 1. current smokers 1.1-1.5 ppd; 0. current smokers >1.5 ppd. Alcohol drinking (M/F): 1. 1-7/3                                                                                                                                                                                                                                                                                                                                                                                                                                                                                                                                                                                                                                                                                            | 8         |

| Author-year                    | Cohort                                    | Country       | Follow-up duration (mean or median) | Men (%) | Age (mean)    | Ethnicity (%)*             | Proportion of high school graduates (%) | Health status                                    | Sample size | Outcome attainment                                              | Definition of healthy lifestyle                                                                                                                                                                                                                                                                                                                                                                           | NOS score |
|--------------------------------|-------------------------------------------|---------------|-------------------------------------|---------|---------------|----------------------------|-----------------------------------------|--------------------------------------------------|-------------|-----------------------------------------------------------------|-----------------------------------------------------------------------------------------------------------------------------------------------------------------------------------------------------------------------------------------------------------------------------------------------------------------------------------------------------------------------------------------------------------|-----------|
|                                |                                           |               |                                     |         |               |                            |                                         |                                                  |             | Health.                                                         | drinks/w; 0. none or >7/3 drinks/w.<br>BMI: 3. 19.6-24.8 kg/m <sup>2</sup> ; 2. <19.6 kg/m <sup>2</sup> or 24.9-29.2 kg/m <sup>2</sup> ; 1. 29.3-32.5 kg/m <sup>2</sup> ; 0. ≥32.6 kg/m <sup>2</sup> .<br>Diet (fat intake from animal products): 1. >385 g/w; 0. ≤385 g/w.<br>Diet (fruit and vegetable consumption): 1. >1350 g/w; 0. ≤1350 g/w.                                                        |           |
| Minlikeeva-2019 <sup>121</sup> | Ovarian Cancer Association Consortium     | International | 1992-2015 (2.99-7.97)               | 0       | NA (NA)       | Mixed                      | NA                                      | Patients with invasive epithelial ovarian cancer | 7022        | All-cause mortality was actively followed up.                   | Smoking: 1. never smokers; 0.5. former smokers; 0. current smokers.<br>PA: 1. physically active; 0. physically inactive;<br>BMI: 1. 18.5-24.9 kg/m <sup>2</sup> ; 0. ≥25 kg/m <sup>2</sup> .                                                                                                                                                                                                              | 6         |
| Mok-2018 <sup>122</sup>        | Atherosclerosis Risk in Communities Study | US            | 1987-2013 (3.30)                    | 43.80   | 45-64 (54.50) | White 75.60<br>Black 24.40 | 70.50                                   | myocardial infarction patients                   | 1277        | All-cause mortality was identified through active surveillance. | Smoking: 2. never smokers and former smokers quitting >1 year; 1. former smokers quitting ≤1 year; 0. current smokers.<br>MVPA: 2. ≥150 min/w; 1. 1-150 min/w; 0. none.<br>BMI: 2. <25 kg/m <sup>2</sup> ; 1. 25-29.9 kg/m <sup>2</sup> ; 0. ≥30 kg/m <sup>2</sup> .<br>Diet (AHA, FFQ): 2. 4-5 components; 1. 2-3 components; 0. 0-1 component.<br>SBP/DBP: 2. <120/80 mmHg (untreated); 1. <120/80 mmHg | 6         |

| Author-year                 | Cohort                                                  | Country | Follow-up duration (mean or median) | Men (%) | Age (mean)         | Ethnicity (%)*             | Proportion of high school graduates (%) | Health status                   | Sample size | Outcome attainment                                                                          | Definition of healthy lifestyle                                                                                                                                                                                                                                                                                                                                                                                                                                                                                                                                                                                                                                                                                                                                                                                                      | NOS score |
|-----------------------------|---------------------------------------------------------|---------|-------------------------------------|---------|--------------------|----------------------------|-----------------------------------------|---------------------------------|-------------|---------------------------------------------------------------------------------------------|--------------------------------------------------------------------------------------------------------------------------------------------------------------------------------------------------------------------------------------------------------------------------------------------------------------------------------------------------------------------------------------------------------------------------------------------------------------------------------------------------------------------------------------------------------------------------------------------------------------------------------------------------------------------------------------------------------------------------------------------------------------------------------------------------------------------------------------|-----------|
| Muntner-2013 <sup>123</sup> | Reasons for Geographic and Racial Differences in Stroke | US      | 2003-2009 (4.00)                    | 45.10   | 45-NA (72.20)      | White 57.70<br>Black 42.30 | 80.80                                   | chronic kidney disease patients | 3093        | All-cause mortality was identified through contact with proxies.                            | (treated) and 120-139/80-89 mmHg; 0. $\geq$ 140/90 mmHg.<br>FBG: 2. $<$ 5.6 mmol/l (untreated); 1. $<$ 5.6 mmol/l (treated) or 5.6-6.9 mmol/l; 0. $\geq$ 7.0 mmol/l.<br>TC: 2. $<$ 5.2 mmol/l (untreated); 1. $<$ 5.2 mmol/l (treated) or 5.2-6.1 mmol/l; 0. $\geq$ 6.2 mmol/l.<br>Smoking: 1. never smokers or quitting $>$ 12 m; 0. quitting $\leq$ 12 m or current smokers;<br>PA: 1. $\geq$ 4 times/w; 0. $<$ 4 times/w.<br>BMI: 1. $<$ 25 kg/m <sup>2</sup> ; 0. $\geq$ 25 kg/m <sup>2</sup> .<br>Diet (AHA, FFQ): 1. 4-5 components; 0. 0-3 components.<br>SBP/DBP: 1. $<$ 120 and 80 mmHg (not treated); 0. $<$ 120 and 80 mmHg (treated) or $\geq$ 120 or 80 mmHg.<br>FPG: 1. $<$ 100 mg/dl (not treated); 0. $<$ 100 mg/dl (treated) $\geq$ 100 mg/d.<br>TC: 1. $<$ 200 mg/dl (not treated); 0. $\geq$ 200 mg/dl (treated). | 6         |
| Nechuta-2010 <sup>124</sup> | Shanghai Women's Health Study                           | China   | 1996-2007 (9.10)                    | 0       | 40-70 ( $<$ 56.95) | Asian 100                  | 42.10                                   | non-smokers and non-drinker     | 63791       | All-cause mortality was identified through Shanghai cancer and vital statistics registries. | 9-point score:<br>Exposed to spouse smoke: 1. never; 0. ever.<br>PA: 2. $\geq$ 2.0 MET h/d; 1. 0.1-1.99 MET h/d; 0. none.<br>BMI: 2. 18.5-24.99 kg/m <sup>2</sup> ; 1. 25.0-                                                                                                                                                                                                                                                                                                                                                                                                                                                                                                                                                                                                                                                         | 8         |

| Author-year                   | Cohort                                                       | Country | Follow-up duration (mean or median) | Men (%) | Age (mean)    | Ethnicity (%)*    | Proportion of high school graduates (%) | Health status     | Sample size | Outcome attainment                                                                                                                  | Definition of healthy lifestyle                                                                                                                                                                                                                                                                                                                                                                                                                                                                                                                                                                                                                                                                                                                                                                                                                                                                                                                                                                                                                                                                                                                                                                                            | NOS score |
|-------------------------------|--------------------------------------------------------------|---------|-------------------------------------|---------|---------------|-------------------|-----------------------------------------|-------------------|-------------|-------------------------------------------------------------------------------------------------------------------------------------|----------------------------------------------------------------------------------------------------------------------------------------------------------------------------------------------------------------------------------------------------------------------------------------------------------------------------------------------------------------------------------------------------------------------------------------------------------------------------------------------------------------------------------------------------------------------------------------------------------------------------------------------------------------------------------------------------------------------------------------------------------------------------------------------------------------------------------------------------------------------------------------------------------------------------------------------------------------------------------------------------------------------------------------------------------------------------------------------------------------------------------------------------------------------------------------------------------------------------|-----------|
| Nöthlings-2010 <sup>125</sup> | European Prospective Investigation into Cancer and Nutrition | Germany | 1994-NA (7.70)                      | 56.05   | 35-65 (57.00) | White predominant | 53.35                                   | diabetic patients | 1263        | All-cause mortality was ascertained by inquiries to municipality registries, regional health departments, physicians, or hospitals. | <p>29.99 kg/m<sup>2</sup>; 0. <math>\geq</math>30.0 kg/m<sup>2</sup> or &lt;18.5 kg/m<sup>2</sup>.</p> <p>WHR: 2. tertile one (&lt;0.786); 1. tertile 2; 0. tertile three (<math>\geq</math>0.830).</p> <p>Diet (fruit and vegetable intake, FFQ): 2. tertile three (<math>\geq</math>626.5 g/d); 1. tertile 2; 0. tertile one (&lt;404.3 g/d).</p> <p>5-point score:<br/>Exposed to spouse smoke: 1. never; 0. ever.</p> <p>PA: 1. <math>\geq</math>2.0 MET h/d; 0. &lt;2.0 MET h/d.</p> <p>BMI: 1. 18.5-24.99 kg/m<sup>2</sup>; 0. <math>\geq</math>25.0 kg/m<sup>2</sup> or &lt;18.5 kg/m<sup>2</sup>.</p> <p>WHR: 1. tertile one (&lt;0.786); 0. tertile two and three (<math>\geq</math>0.786).</p> <p>Diet (fruit and vegetable intake, FFQ): 1. tertile three (<math>\geq</math>626.5 g/d); 0. tertile two and one (&lt;626.5 g/d).</p> <p>Smoking: 1. never smokers; 0. ever smokers.</p> <p>Alcohol drinking (M/F): 1. 5-25/15 g/d; 0. &lt;5 or &gt;25/15 g/d.</p> <p>PA: 1. <math>\geq</math>3.5 h/w; 0. &lt;3.5 h/w.</p> <p>BMI: 1. &lt;30 kg/m<sup>2</sup>; 0. <math>\geq</math>30 kg/m<sup>2</sup>.</p> <p>Diet (z-scores of consumption of fruits and vegetables, whole-grain bread, and red meat, FFQ):</p> | 8         |

| Author-year                     | Cohort                                        | Country   | Follow-up duration (mean or median) | Men (%) | Age (mean)       | Ethnicity (%)*    | Proportion of high school graduates (%) | Health status                     | Sample size | Outcome attainment                                                                                       | Definition of healthy lifestyle                                                                                                                                                                                                                                                                                                                                                                                                                                                                                                                                                                                            | NOS score |
|---------------------------------|-----------------------------------------------|-----------|-------------------------------------|---------|------------------|-------------------|-----------------------------------------|-----------------------------------|-------------|----------------------------------------------------------------------------------------------------------|----------------------------------------------------------------------------------------------------------------------------------------------------------------------------------------------------------------------------------------------------------------------------------------------------------------------------------------------------------------------------------------------------------------------------------------------------------------------------------------------------------------------------------------------------------------------------------------------------------------------------|-----------|
| Odegaard-2011 <sup>§, 126</sup> | -Potsdam<br>Singapore<br>Chinese Health Study | Singapore | 1993-2016<br>(20.60)                | 45.10   | 45-74<br>(55.30) | Asian predominant | <32.70                                  | general population                | 44052       | All-cause mortality was obtained through linkage with the nationwide Singapore Birth and Death Registry. | 1. >median; 0. ≤median.<br>6-point score:<br>Smoking: 1. never smokers; 0. ever smokers.<br>Alcohol drinking (M/F): 1. 0.1-14/7 drinks/w; 0. none or >14/7 drinks/w.<br>PA: 1. moderate activity ≥2 h/w, or strenuous activity ≥0.5 h/w; 0. moderate activity <2 h/w, or strenuous activity <0.5 h/w.<br>BMI (aged <65/aged ≥65): 1. 18.5-21.4/24.4 kg/m <sup>2</sup> ; 0. <18.5 or ≥21.5/24.5 kg/m <sup>2</sup> .<br>Diet (AHEI-2010, FFQ): 1. highest 40%; 0. Lower 60%.<br>Sleeping: 1. 7-8 h/d; 0. <7 or >8 h/d.<br>5-point score: smoking, drinking, PA, BMI, and diet.<br>4-point score: smoking, PA, BMI, and diet. | 8         |
| Patel-2018 <sup>127</sup>       | Physicians' Health Study                      | US        | 1997-NA<br>(9.00)                   | 100     | NA<br>(69.00)    | White predominant | Predominant                             | type 2 diabetes mellitus patients | 1163        | All-cause mortality was identified by active follow-up and confirmed by medical records.                 | Smoking: 1. not current smokers; 0. current smokers.<br>Alcohol drinking: 1. 1-2 drinks/d; 0. <1 drink/d or >2 drinks/d.<br>PA: 1. VPA ≥once /w; 0. VPA <once /w.<br>BMI: 1. <25 kg/m <sup>2</sup> ; 0. ≥25 kg/m <sup>2</sup> .<br>Diet (AHEI 2010, FFQ): 1. top two                                                                                                                                                                                                                                                                                                                                                       | 7         |

| Author-year                  | Cohort                                  | Country | Follow-up duration (mean or median) | Men (%) | Age (mean)    | Ethnicity (%)*            | Proportion of high school graduates (%) | Health status         | Sample size | Outcome attainment                                                                                                        | Definition of healthy lifestyle                                                                                                                                                                                                                                                                                                                                                                                                                               | NOS score |
|------------------------------|-----------------------------------------|---------|-------------------------------------|---------|---------------|---------------------------|-----------------------------------------|-----------------------|-------------|---------------------------------------------------------------------------------------------------------------------------|---------------------------------------------------------------------------------------------------------------------------------------------------------------------------------------------------------------------------------------------------------------------------------------------------------------------------------------------------------------------------------------------------------------------------------------------------------------|-----------|
| Pelser-2014 <sup>128</sup>   | American Association of Retired Persons | US      | 1996-2008 (5.00)                    | 67.58   | 50-71 (69.32) | White 97.95<br>Black 1.10 | 92.65                                   | colon cancer patients | 5727        | All-cause mortality was identified through the National Death Index and Social Security Administration Death Master File. | quintiles; 0. low three quintiles.<br>Smoking: 1. never smokers or quitting ≥1 year; 0. quitting <1 year or current smokers.<br>Alcohol drinking (M/F): 1. ≤2/1 drinks/d; 0. >2/1 drinks/d.<br>PA: 1. ≥3 episodes/w; 0. <3 episodes/w.<br>BMI: 1. 18.5-24.9 kg/m <sup>2</sup> ; 0. ≥25.0 kg/m <sup>2</sup> .<br>Diet (HEI, FFQ): 1. top two quintiles; 0. lower three quintiles.                                                                              | 7         |
| Petersen-2015 <sup>129</sup> | Diet, Cancer and Health cohort study    | Denmark | 1993-2010 (14.00)                   | 47.10   | 50-64 (55.53) | White predominant         | 11.00                                   | general population    | 51521       | All-cause mortality was identified through the Central Population Registry and Register of Causes of Death.               | 5-point score:<br>Smoking: 1. never smokers or quitting ≥15 years; 0. current smokers or quitting <15 years.<br>Alcohol drinking (M/F): 1. ≤14/7 units/w; 0. >14/7 units/w.<br>PA: 1. ≥30 min/d; 0. <30 min/d.<br>WC: 1. ≤102 cm; 0. >102 cm.<br>Diet (score consisting of fat, red and processed meat, fish, whole grain, and fruit and vegetable consumption, FFQ): 1. 2-5 components; 0. 0-1 component.<br>4-point score: smoking, drinking, PA, and diet. | 8         |
| Prinelli-                    | "two                                    | Italy   | 1991-2012                           | 49.59   | 40-74         | White                     | <46.51                                  | general               | 974         | All-cause mortality                                                                                                       | Smoking: 1. never smokers; 0. ever                                                                                                                                                                                                                                                                                                                                                                                                                            | 9         |



| Author-year                 | Cohort                                                | Country | Follow-up duration (mean or median) | Men (%) | Age (mean)     | Ethnicity (%)*             | Proportion of high school graduates (%) | Health status                                        | Sample size | Outcome attainment                                                                                                                                               | Definition of healthy lifestyle                                                                                                                                                                                                                                                                                                                                                                                                       | NOS score |
|-----------------------------|-------------------------------------------------------|---------|-------------------------------------|---------|----------------|----------------------------|-----------------------------------------|------------------------------------------------------|-------------|------------------------------------------------------------------------------------------------------------------------------------------------------------------|---------------------------------------------------------------------------------------------------------------------------------------------------------------------------------------------------------------------------------------------------------------------------------------------------------------------------------------------------------------------------------------------------------------------------------------|-----------|
| 2015 <sup>130</sup>         | towns in Northern Italy cohort"                       |         | (17.40)                             |         | (55.75)        | predominant                |                                         | population                                           |             | was identified through Regional Registries of the Informative System of the Local Health Authority of Milan 1.                                                   | smokers.<br>PA: 1. engage $\geq 1$ sport/d; 0. engage no sport.<br>Diet (MDS, FFQ): 1. lowest tertile; 0. highest tertile.                                                                                                                                                                                                                                                                                                            |           |
| Ricardo-2013 <sup>131</sup> | National Health and Nutrition Examination Surveys III | US      | 1988-2006 (13.00)                   | 40.00   | 18->80 (59.00) | White 81.00<br>Black 12.00 | 61.88                                   | chronic kidney disease patients                      | 2145        | All-cause mortality was identified through National Health and Nutrition Examination Surveys III Linked Mortality Public-use File.                               | Smoking: 9. never smoking; 7. Past smoking; 0. current smoking.<br>PA: 3. moderate LTPA $\geq 5$ times/w or vigorous PA $\geq 3$ times/w or the combination; 2. moderate LTPA $< 5$ times/w or vigorous PA $< 3$ times/w or the combination; 0. no LTPA.<br>BMI: 2. $\geq 30$ kg/m <sup>2</sup> ; 0. 22-29.9 kg/m <sup>2</sup> ; -4. 18.5-21.9 kg/m <sup>2</sup> .<br>Diet (HEI, 24h recall): 1. 73.1-100 points; 0. $< 73.1$ points. | 8         |
| Ricardo-2015 <sup>132</sup> | Chronic Renal Insufficiency Cohort                    | US      | 2003-2011 (4.00)                    | 52.00   | 21-74 (58.00)  | White 47.17<br>Black 43.95 | 84.50                                   | population with eGFR 20–70 ml/min/1.73m <sup>2</sup> | 3006        | All-cause mortality was identified through reports by next of kin, death certificates, hospital records, and linkage with the Social Security Death Master File. | Smoking: 1. not current smokers; 0. current smokers.<br>PA: 1. MPA $\geq 150$ min/w, or VPA $\geq 75$ min/w, or MVPA $\geq 150$ min/w; 0. MPA $< 150$ min/w, or VPA $< 75$ min/w, or MVPA $< 150$ min/w.<br>BMI: 1. 20.0-24.9 kg/m <sup>2</sup> ; 0. $< 20.0$ kg/m <sup>2</sup> or $\geq 25$ kg/m <sup>2</sup> .<br>Diet (AHA, FFQ): 1. 4-5 points; 0. 0-3 points.                                                                    | 6         |

| Author-year                 | Cohort                                                       | Country | Follow-up duration (mean or median) | Men (%) | Age (mean)    | Ethnicity (%)*    | Proportion of high school graduates (%) | Health status              | Sample size | Outcome attainment                                                                                                                                                      | Definition of healthy lifestyle                                                                                                                                                                                                                                                                                                                                                                                                                                                                                                                                                                                                                                                                                                                           | NOS score |
|-----------------------------|--------------------------------------------------------------|---------|-------------------------------------|---------|---------------|-------------------|-----------------------------------------|----------------------------|-------------|-------------------------------------------------------------------------------------------------------------------------------------------------------------------------|-----------------------------------------------------------------------------------------------------------------------------------------------------------------------------------------------------------------------------------------------------------------------------------------------------------------------------------------------------------------------------------------------------------------------------------------------------------------------------------------------------------------------------------------------------------------------------------------------------------------------------------------------------------------------------------------------------------------------------------------------------------|-----------|
| Rizzuto-2016 <sup>133</sup> | Kungsholmen cohort                                           | Sweden  | 1987-2013 (NA)                      | 25.31   | 75-NA (81.27) | White predominant | 47.19                                   | general population         | 1229        | All-cause mortality was identified through death certificates.                                                                                                          | Smoking: 1. not current smokers; 0. current smokers.<br>PA: 1. any leisure activities; 0. no leisure activities.<br>Social network: 1. rich or moderate; 0. poor.                                                                                                                                                                                                                                                                                                                                                                                                                                                                                                                                                                                         | 9         |
| Romaguera-2015 <sup>3</sup> | European Prospective Investigation into Cancer and Nutrition | Europe  | 1992-2009 (4.20)                    | 45.47   | NA (64.60)    | White predominant | <57.90                                  | colorectal cancer patients | 3292        | All-cause mortality was identified through health insurance records, cancer and pathology registries, and active follow-up through study subjects and their next-of-kin | Alcohol drinking (M/F): 1. ≤20/10 g/d; 0.5. 20.1-30/10.1-20 g/d; 0. >30/20 g/d.<br>PA: 1. Manual/heavy manual job, or >2 h/w of VPA, or >30 min/d of cycling/sports; 0.5. cycling/sports 15-30 min/d; 0. cycling/sports <15 min/d.<br>BMI: 1. 18.5-24.9 kg/m <sup>2</sup> ; 0.5. 25-29.9 kg/m <sup>2</sup> ; 0. <18.5 kg/m <sup>2</sup> or ≥30 kg/m <sup>2</sup> .<br>Diet (energy-dense, dietary questionnaires): 1. ≤125 kcal/100g/d; 0.5. 126-175 kcal/100g/d; 0. >175 kcal/100g/d.<br>Diet (SSB, dietary questionnaires): 1. zero g/d; 0.5. ≤250 g/d; 0. >250 g/d.<br>Diet (fruit and vegetables, dietary questionnaires): 1. ≥400 g/d; 0.5. 200-399 g/d; 0. <200 g/d.<br>Diet (DF, dietary questionnaires): 1. ≥25 g/d; 0.5. 12.5-24.9 g/d; 0. <12.5 | 6         |

| Author-year               | Cohort                 | Country | Follow-up duration (mean or median) | Men (%) | Age (mean)    | Ethnicity (%)*    | Proportion of high school graduates (%) | Health status      | Sample size | Outcome attainment                                                    | Definition of healthy lifestyle                                                                                                                                                                                                                                                                                                                                                                                                                                                                                                                                                                                                                                                                                                                                                                                                                                                                                                         | NOS score |
|---------------------------|------------------------|---------|-------------------------------------|---------|---------------|-------------------|-----------------------------------------|--------------------|-------------|-----------------------------------------------------------------------|-----------------------------------------------------------------------------------------------------------------------------------------------------------------------------------------------------------------------------------------------------------------------------------------------------------------------------------------------------------------------------------------------------------------------------------------------------------------------------------------------------------------------------------------------------------------------------------------------------------------------------------------------------------------------------------------------------------------------------------------------------------------------------------------------------------------------------------------------------------------------------------------------------------------------------------------|-----------|
| Sovic-2012 <sup>134</sup> | Croatian Health Survey | Croatia | 2003-NA (4.79)                      | 32.24   | 18-NA (54.78) | White predominant | NA                                      | general population | 7490        | The methods for all-cause mortality identification were not reported. | g/d.<br>Diet (red and processed meat, dietary questionnaires): 1. <500 g/w and <3 g/d; 0.5. <500 g/w and 3-49 g/d; 0. ≥500 g/w or ≥50 g/d.<br>Cumulative breastfeeding: 1. ≥6 m; 0.5. 0.1-5.9 m; 0. zero m.<br>Smoking: 1. never smokers or smoking <5 years in the previous 10 years; 0. current smokers or smoking ≥5 years in the previous 10 years.<br>Alcohol drinking: 1. <6 shooters, glasses or bottles at one occasion or <once /m, or not drinking spirits, vine or beer every day combined with received advice to drink less from health care professional or member of the family; 0. ≥6 shooters, glasses or bottles at one occasion at least once a month, or drinking spirits, vine or beer every day combined with received advice to drink less from health care professional or member of the family.<br>PA (not working, working at home, travelling to work by public transport or working within a 15-min walking | 7         |

| Author-year           | Cohort                           | Country | Follow-up duration (mean or median) | Men (%) | Age (mean) | Ethnicity (%)*    | Proportion of high school graduates (%) | Health status      | Sample size | Outcome attainment                                            | Definition of healthy lifestyle                                                                                                                                                                                                                                                                                                                                                                                                                                                                                                              | NOS score |
|-----------------------|----------------------------------|---------|-------------------------------------|---------|------------|-------------------|-----------------------------------------|--------------------|-------------|---------------------------------------------------------------|----------------------------------------------------------------------------------------------------------------------------------------------------------------------------------------------------------------------------------------------------------------------------------------------------------------------------------------------------------------------------------------------------------------------------------------------------------------------------------------------------------------------------------------------|-----------|
|                       |                                  |         |                                     |         |            |                   |                                         |                    |             |                                                               | or cycling distance, easy or very easy job (sedentary or walking), physical activity for at least 30 min less than twice a week during leisure time, advice received from a health care professional within the past year to increase physical activity): 1. met <3 items; 0. met ≥3 items.<br>Diet (consuming animal fat, consuming milk and milk products with more than 3.2% fat, not eating fruits every day, consuming cured meat every day or almost every day, adding salt prior to meal tasting): 1. met 0-1 items; 0. met ≥2 items. |           |
| Tamakoshi-2009 †, 135 | Japan Collaborative Cohort Study | Japan   | 1988-2003 (12.5)                    | 44.41   | 40-79 (NA) | Asian predominant | 63.88                                   | general population | 62106       | All-cause mortality was identified though death certificates. | Smoking: 1. not current smokers; 0. current smokers.<br>Alcohol drinking: 1. ≤22.8 g alcohol/occasion; 0. >22.8 g alcohol/occasion.<br>PA (walking): 1. ≥1 h/d; 0. <1 h/d.<br>BMI: 1. 18.5-24.9 kg/m <sup>2</sup> ; 0. <18.5 kg/m <sup>2</sup> or ≥25.0 kg/m <sup>2</sup> .<br>Diet (green leafy vegetables): 1. ≥once /d; 0. <once /d.<br>Sleeping: 1. 6.5-7.4 h/d; 0. <6.5 h/d or >7.4 h/d.                                                                                                                                                | 8         |
| Tamakoshi-            | Japan                            | Japan   | 1988-2006                           | 44.41   | 40-79      | Asian             | 63.88                                   | general            | 62106       | All-cause mortality                                           | Smoking: 1. not current smokers; 0.                                                                                                                                                                                                                                                                                                                                                                                                                                                                                                          | 6         |

| Author-year                    | Cohort                                                                                                            | Country   | Follow-up duration (mean or median) | Men (%) | Age (mean)    | Ethnicity (%)*    | Proportion of high school graduates (%) | Health status      | Sample size | Outcome attainment                                                          | Definition of healthy lifestyle                                                                                                                                                                                                                                                                                                                                                                 | NOS score |
|--------------------------------|-------------------------------------------------------------------------------------------------------------------|-----------|-------------------------------------|---------|---------------|-------------------|-----------------------------------------|--------------------|-------------|-----------------------------------------------------------------------------|-------------------------------------------------------------------------------------------------------------------------------------------------------------------------------------------------------------------------------------------------------------------------------------------------------------------------------------------------------------------------------------------------|-----------|
| 2010 <sup>†, 136</sup>         | Collaborative Cohort Study                                                                                        |           | (14.5)                              |         | (NA)          | predominant       |                                         | population         |             | was identified though death certificates.                                   | current smokers.<br>Alcohol drinking: 1. $\leq 23$ g alcohol/occasion; 0. $> 23$ g alcohol/occasion.<br>PA (walking): 1. $\geq 1$ h/d; 0. $< 1$ h/d.<br>BMI: 1. 18.5-24.9 kg/m <sup>2</sup> ; 0. $< 18.5$ kg/m <sup>2</sup> or $\geq 25.0$ kg/m <sup>2</sup> .<br>Diet (green leafy vegetables): 1. $\geq$ once /d; 0. $<$ once /d.<br>Sleeping: 1. 6.5-7.4 h/d; 0. $< 6.5$ h/d or $> 7.4$ h/d. |           |
| Tamosiunas-2014 <sup>137</sup> | MONitoring trends and determinants of Cardiovascular disease-Lithuania & Health, Alcohol and Psychosocial Factors | Lithuania | 1983-2011 (13.30)                   | 46.13   | 45-64 (55.18) | White predominant | 63.66                                   | general population | 5635        | All-cause mortality was identified through the regional mortality register. | Smoking: 1. never smokers; 0. ever smokers.<br>PA (LTPA): 1. $\geq 7$ h/w; 0. $< 7$ h/w.<br>BMI: 1. $< 25.0$ kg/m <sup>2</sup> ; 0. $\geq 25.0$ kg/m <sup>2</sup> .<br>SBP/DBP: 1. $< 120$ and 80 mmHg (untreated); 0. $\geq 120$ or 80 mmHg, or $< 120$ and 80 mmHg (treated).<br>FBG: 1. $< 5.55$ mmol/L; 0. $\geq 5.55$ mmol/L.<br>TC: 1. $< 5.2$ mmol/L; 0. $\geq 5.2$ mmol/L.              | 8         |

| Author-year                     | Cohort                                                                   | Country | Follow-up duration (mean or median) | Men (%) | Age (mean)    | Ethnicity (%)*                          | Proportion of high school graduates (%) | Health status        | Sample size | Outcome attainment                                                                                                               | Definition of healthy lifestyle                                                                                                                                                                                                                                                                                                                                                                                                                                                                                | NOS score |
|---------------------------------|--------------------------------------------------------------------------|---------|-------------------------------------|---------|---------------|-----------------------------------------|-----------------------------------------|----------------------|-------------|----------------------------------------------------------------------------------------------------------------------------------|----------------------------------------------------------------------------------------------------------------------------------------------------------------------------------------------------------------------------------------------------------------------------------------------------------------------------------------------------------------------------------------------------------------------------------------------------------------------------------------------------------------|-----------|
| Thomson-2014 <sup>138</sup>     | in Eastern Europe Study<br>Women's Health Initiative Observational Study | US      | 1993-NA (12.60)                     | 0       | 50-79 (63.23) | White 88.57<br>Black 7.01<br>Asian 2.97 | >79.57                                  | postmenopausal women | 65838       | All-cause mortality was identified through self-reported data and verified through Medical records and the National Death Index. | Alcohol drinking: 2. nondrinker; 1. 0.1-1 drink/d; 0. >1 drink/d<br>PA: 2. >17.5 MET-h/w; 1. 8.75-17.5 MET-h/w; 0. <8.75 MET-h/w.<br>BMI: 2. <25 kg/m <sup>2</sup> at age 18 years and baseline; 1. 25-29.9 kg/m <sup>2</sup> at age 18 years and baseline; 0. ≥30 kg/m <sup>2</sup> at age 18 years and baseline.<br>Diet (score consisting of fruit and vegetable intake, total carotenoids level, whole grains%, and red and processed meat, FFQ): 2. 7-9 components; 1. 3-6 components; 0. 0-2 components. | 8         |
| Towfighi-2012 <sup>†, 139</sup> | National Health and Nutrition Examination Surveys III                    | US      | 1988-2000 (NA)                      | 50.00   | NA (67.00)    | White 81.10<br>Black 11.10              | 61.88                                   | stroke patients      | 388         | All-cause mortality was identified through the National Death Index death certificate records.                                   | Smoking: 1. not current smokers; 0. current smokers.<br>Alcohol drinking (M/F): 1. 0.1-2/1 drinks/d; 0. none or >2/1 drinks/d.<br>PA: 1. >12 times/m; 0. ≤12 times/m.<br>BMI: 1. 18.5-29.9 kg/m <sup>2</sup> ; 0. <18.5 or ≥30 kg/m <sup>2</sup> .<br>Diet (fruit and vegetables): 1. ≥5 servings/d; 0. <5 servings/d.                                                                                                                                                                                         | 8         |
| Tsubono-                        | "Wakuya                                                                  | Japan   | 1988-1992                           | 39.76   | 40-NA         | Asian                                   | NA                                      | general              | 3312        | All-cause mortality                                                                                                              | Smoking: 1. never smokers; 0. ever                                                                                                                                                                                                                                                                                                                                                                                                                                                                             | 7         |

| Author-year                      | Cohort                         | Country | Follow-up duration (mean or median) | Men (%) | Age (mean)    | Ethnicity (%)*    | Proportion of high school graduates (%) | Health status                                                  | Sample size | Outcome attainment                                                                                 | Definition of healthy lifestyle                                                                                                                                                                                                                                                                                                                                                                                                                                      | NOS score |
|----------------------------------|--------------------------------|---------|-------------------------------------|---------|---------------|-------------------|-----------------------------------------|----------------------------------------------------------------|-------------|----------------------------------------------------------------------------------------------------|----------------------------------------------------------------------------------------------------------------------------------------------------------------------------------------------------------------------------------------------------------------------------------------------------------------------------------------------------------------------------------------------------------------------------------------------------------------------|-----------|
| 1993 <sup>140</sup>              | Town survey"                   |         | (NA)                                |         | (NA)          | predominant       |                                         | population                                                     |             | was identified through residents' registration of the town.                                        | smokers.<br>Alcohol drinking: 1. never drinker; 0. ever drinker.<br>PA: 1. ≥1 h/w; 0. <1 h/w.<br>BMI: 1. ≥21.2 kg/m <sup>2</sup> ; 0. <21.2 kg/m <sup>2</sup> .<br>Sleeping: 1. 7-8 h/night; 0. <7 h/night or >8 h/night.                                                                                                                                                                                                                                            |           |
| Tsubono-2004 <sup>141</sup>      | "Miya Prefecture cohort"       | Japan   | 1990-2001 (10.36)                   | 49.37   | 40-64 (50.76) | Asian predominant | 62.61                                   | general population who were not past smokers and past drinkers | 28333       | All-cause mortality was identified through residential Registration Record and death certificates. | Smoking: 1. never smokers; 0. current smokers.<br>Alcohol drinking: 1. <22.8 g/d; 0. ≥22.8 g/d.<br>PA: 1. ≥1 h/d; 0. <1 h/d.<br>BMI: 1. 18.5-29.9 kg/m <sup>2</sup> ; 0. <18.5 kg/m <sup>2</sup> or ≥30.0 kg/m <sup>2</sup> .                                                                                                                                                                                                                                        | 8         |
| Van Blarigan-2018 <sup>142</sup> | The CALGB 89803/Alliance Trial | US      | 1999-2009 (7.00)                    | 56.65   | 21-85 (59.60) | White 89.01       | NA                                      | stage III colon cancer patients                                | 992         | The methods of identifying all-cause mortality were not reported.                                  | 8-point score:<br>Alcohol drinking (M/F): 2. 0.1-2/1 drinks/d; 1. non-drinker; 0. >2/1 drinks/d.<br>PA: 2. ≥17.5 MET-h/w; 1. 8.75-17.49 MET-h/w; 0. <8.75 MET-h/w.<br>BMI: 2. 18.5-24.9 kg/m <sup>2</sup> ; 1. 25-29.9 kg/m <sup>2</sup> ; 0. ≥30 kg/m <sup>2</sup> .<br>Diet (score including fruits and vegetables, whole grains, red and processed meat, fish and SSB, FFQ): 2. 11-15 points; 1. 6-10 points; 0. 0-5 points.<br>6-point score: PA, BMI, and diet. | 8         |

| Author-year                        | Cohort                   | Country     | Follow-up duration (mean or median) | Men (%) | Age (mean)     | Ethnicity (%)*    | Proportion of high school graduates (%) | Health status      | Sample size | Outcome attainment                                                                                                                                        | Definition of healthy lifestyle                                                                                                                                                                                                                                                                    | NOS score |
|------------------------------------|--------------------------|-------------|-------------------------------------|---------|----------------|-------------------|-----------------------------------------|--------------------|-------------|-----------------------------------------------------------------------------------------------------------------------------------------------------------|----------------------------------------------------------------------------------------------------------------------------------------------------------------------------------------------------------------------------------------------------------------------------------------------------|-----------|
| Van Dam-2008 †, 67                 | Nurses' Health Study     | US          | 1980-2004 (22.62)                   | 0       | 34-59 (NA)     | White predominant | Predominant                             | general population | 77782       | All-cause mortality was identified through reports by next of kin, the postal authorities, death certificates, medical records, and National Death Index. | Smoking: 1. never smokers; 0. ever smokers.<br>Alcohol drinking: 1. 1-14.9 g/d; 0. <1 g/d or ≥15.0 g/d.<br>PA (MVPA): 1. ≥30 min/d; 0. <30 min/d.<br>BMI: 1. 18.5-25.0 kg/m <sup>2</sup> ; 0. >25.0 kg/m <sup>2</sup> .<br>Diet (AHEI, FFQ): 1. upper two fifths; 0. lower three fifths.           | 6         |
| Van Den Brandt-2011 <sup>143</sup> | Netherlands Cohort Study | Netherlands | 1986-1996 (NA)                      | 48.22   | 55-69 (>59.46) | White predominant | 45.16-55.62                             | general population | 120852      | All-cause mortality was identified through the Dutch Central Bureau of Genealogy.                                                                         | Smoking: 1. never smokers or quitting ≥10 years; 0. current smokers or quitting <10 years;<br>PA: 1. ≥30 min/d; 0. <30 min/d.<br>BMI: 1. 18.5-24.9 kg/m <sup>2</sup> ; 0. <18.5 kg/m <sup>2</sup> or ≥25.0 kg/m <sup>2</sup> .<br>Diet (aMDS, FFQ): 1. 5-9 points; 0. 0-4 points.                  | 8         |
| van Lee-2016 <sup>144</sup>        | Rotterdam Study          | Netherlands | 1990-2011 (20.00)                   | 40.47   | 55-NA (65.43)  | White predominant | 69.73                                   | general population | 3593        | All-cause mortality was identified through municipal population registries.                                                                               | Alcohol drinking (M/F): 10. ≤20/10 g/d; 0. >20/10 g/d.<br>PA: 10. ≥150 min/w; 0. <150 min/w.<br>Diet (vegetable consumption, FFQ): 10. 150-200 g/d; 0. <150 g/d or >200 g/d.<br>Diet (fruit consumption, FFQ): 10. ≥200 g/d; 0. <200 g/d.<br>Diet (DF, FFQ): 10. 30-40 g/d; 0. <30 g/d or >40 g/d. | 9         |



| Author-year                  | Cohort                                                       | Country | Follow-up duration (mean or median) | Men (%) | Age (mean)    | Ethnicity (%)*    | Proportion of high school graduates (%) | Health status      | Sample size | Outcome attainment                                                                                                                                                                                                                       | Definition of healthy lifestyle                                                                                                                                                                                                                                                                                                                                                                                                                                                                                                                                                                                                                                                                                                                                                                                                                                                                                                                                                                                                                                                                                                                                                                                                                                           | NOS score |
|------------------------------|--------------------------------------------------------------|---------|-------------------------------------|---------|---------------|-------------------|-----------------------------------------|--------------------|-------------|------------------------------------------------------------------------------------------------------------------------------------------------------------------------------------------------------------------------------------------|---------------------------------------------------------------------------------------------------------------------------------------------------------------------------------------------------------------------------------------------------------------------------------------------------------------------------------------------------------------------------------------------------------------------------------------------------------------------------------------------------------------------------------------------------------------------------------------------------------------------------------------------------------------------------------------------------------------------------------------------------------------------------------------------------------------------------------------------------------------------------------------------------------------------------------------------------------------------------------------------------------------------------------------------------------------------------------------------------------------------------------------------------------------------------------------------------------------------------------------------------------------------------|-----------|
| Vergnaud-2013 <sup>145</sup> | European Prospective Investigation into Cancer and Nutrition | Europe  | 1992-2010 (12.80)                   | 32.05   | 25-70 (51.90) | White predominant | <67.34                                  | general population | 378864      | All-cause mortality was identified through cancer registries, boards of health, and death indexes, or active follow-up including inquiries to participants, municipal registries, regional health departments, physicians and hospitals. | <p>Diet (fish consumption, FFQ): 10. <math>\geq 2</math> portions/w and <math>\geq 1</math> oily fish; 0. <math>&lt; 2</math> portions/w or <math>&lt; 1</math> oily fish.</p> <p>Diet (SFA, FFQ): 10. <math>&lt; 10\%E</math>; 0. <math>\geq 10\%E</math>.</p> <p>Diet (mono trans-FA, FFQ): 10. <math>&lt; 1\%E</math>; 0. <math>\geq 1\%E</math>.</p> <p>Diet (salt, FFQ): 10. <math>\leq 6</math> g/d; 0. <math>&gt; 6</math> g/d.</p> <p>Alcohol drinking (M/F): 1. <math>\leq 20/10</math> g/d; 0.5. 21-30/11-20 g/d; 0. <math>&gt; 30/20</math> g/d.</p> <p>PA: 1. manual/heavy manual job, or <math>&gt; 2</math> h/w of vigorous PA, or <math>&gt; 30</math> min/d of cycling/sports; 0.5. cycling/sports 15-30 min/d; 0. cycling/sports <math>&lt; 15</math> min/d.</p> <p>BMI: 1. 18.5-24.9 kg/m<sup>2</sup>; 0.5. 25-29.9 kg/m<sup>2</sup>; 0. <math>&lt; 18.5</math> kg/m<sup>2</sup> or <math>\geq 30.0</math> kg/m<sup>2</sup>.</p> <p>Diet (energy-dense, dietary questionnaires): 0.5. <math>\leq 125</math> kcal/100g/d; 0.25. 126-175 kcal/100g/d; 0. <math>&gt; 175</math> kcal/100g/d.</p> <p>Diet (SSB, dietary questionnaires): 0.5. zero g/d; 0.25. <math>\leq 250</math> g/d; 0. <math>&gt; 250</math> g/d.</p> <p>Diet (fruit and vegetable</p> | 7         |

| Author-year                         | Cohort                              | Country | Follow-up duration (mean or median) | Men (%) | Age (mean)          | Ethnicity (%)*             | Proportion of high school graduates (%) | Health status      | Sample size | Outcome attainment                                                    | Definition of healthy lifestyle                                                                                                                                                                                                                                                                                                                                                                                                                                                                                                                                                                                                                                                                                                                                | NOS score |
|-------------------------------------|-------------------------------------|---------|-------------------------------------|---------|---------------------|----------------------------|-----------------------------------------|--------------------|-------------|-----------------------------------------------------------------------|----------------------------------------------------------------------------------------------------------------------------------------------------------------------------------------------------------------------------------------------------------------------------------------------------------------------------------------------------------------------------------------------------------------------------------------------------------------------------------------------------------------------------------------------------------------------------------------------------------------------------------------------------------------------------------------------------------------------------------------------------------------|-----------|
| Warren Andersen-2018 <sup>146</sup> | the Southern Community Cohort Study | US      | 2002-2013 (8.00)                    | 40.51   | 40-79 (50.65)       | White 31.10<br>Black 68.90 | 70.90                                   | general population | 74732       | All-cause mortality was identified through National Death Index.      | consumption, dietary questionnaires): 0.5. $\geq 400$ g/d; 0.25. 200-399 g/d 0. $< 200$ g/d.<br>Diet (DF, dietary questionnaires): 0.5. $\geq 25$ g/d; 0.25. 12.5-24.9 g/d; 0. $< 12.5$ g/d.<br>Diet (red and processed meat consumption, dietary questionnaires): 1. $< 500$ g/w and $< 3$ g/d; 0.5. $< 500$ g/w and 3-49 g/d; 0. $\geq 500$ g/w or $\geq 50$ g/d.<br>Cumulative breastfeeding: 1. $\geq 6$ m; 0.5. 0.1-5.9 m; 0. zero m.<br>Alcohol drinking (M/F): 1. $\leq 2/1$ drink/d; 0. $> 2/1$ drink/d.<br>PA: 1. MPA $\geq 150$ min/w, or VPA $\geq 75$ min/w, or MVPA $\geq 150$ min/w; 0. MPA $< 150$ min/w, and VPA $< 75$ min/w, and MVPA $< 150$ min/w.<br>Sedentary behavior: 1. limit; 0. not limit.<br>Diet (HEI, FFQ): 1. higher; 0. lower. | 8         |
| Wingard-1982 <sup>147</sup>         | Human Population Laboratory         | US      | 1965-1974 (NA)                      | 47.17   | 30-69 ( $< 53.28$ ) | NA                         | NA                                      | general population | 4725        | All-cause mortality was identified through California Death Registry. | Smoking: 1. never smokers; 0. ever smokers.<br>Alcohol drinking: 1. $< 45$ drinks/m; 0. $> 45$ drinks/m.<br>PA: 1. active; 0. inactive.<br>Quetelet index (weight in                                                                                                                                                                                                                                                                                                                                                                                                                                                                                                                                                                                           | 7         |

| Author-year                     | Cohort                                                | Country | Follow-up duration (mean or median) | Men (%) | Age (mean)    | Ethnicity (%)*             | Proportion of high school graduates (%) | Health status      | Sample size | Outcome attainment                                                                            | Definition of healthy lifestyle                                                                                                                                                                                                                                                                                                                                                                                                                                                                                                                                                                                                                                                                                           | NOS score |
|---------------------------------|-------------------------------------------------------|---------|-------------------------------------|---------|---------------|----------------------------|-----------------------------------------|--------------------|-------------|-----------------------------------------------------------------------------------------------|---------------------------------------------------------------------------------------------------------------------------------------------------------------------------------------------------------------------------------------------------------------------------------------------------------------------------------------------------------------------------------------------------------------------------------------------------------------------------------------------------------------------------------------------------------------------------------------------------------------------------------------------------------------------------------------------------------------------------|-----------|
| Yang-2012 <sup>†</sup> ,<br>148 | National Health and Nutrition Examination Surveys III | US      | 1988-2006 (14.50)                   | 48.20   | 20-NA (45.00) | White 81.10<br>Black 11.10 | 61.88                                   | general population | 13312       | All-cause mortality was identified through the National Death Index.                          | pounds/(height in inches) <sup>2</sup> ) based on Metropolitan Life Insurance reports: 1. 9.9% underweight-29.9% overweight; 0. extreme underweight or overweight.<br>Sleeping: 1. 7-8 h/night; 0. <7 h/night or >8 h/night.<br>Smoking: 1. not current smokers; 0. current smokers.<br>PA: 1. 3-5.9 METs for ≥5 times/w or ≥6 METs for ≥3 times/w; 0. 3-5.9 METs for <5 times/w and <6 METs for <3 times/w.<br>BMI: 1. <25 kg/m <sup>2</sup> ; 0. ≥25 kg/m <sup>2</sup> .<br>Diet (AHA, FFQ): 1. ≥2 points; 0. <2 points.<br>TC: 1. <200 mg/dl (untreated); 0. <200 mg/dl (treated) or ≥200 mg/dl.<br>SBP/DBP: 1. <120 and 80 mmHg (untreated); 0. <120/80 mmHg (treated) or ≥120/80 mmHg.<br>HbA1c: 1. <5.7%; 0. ≥5.7%. | 8         |
| Yates-2008 <sup>149</sup>       | Physicians' Health Study                              | US      | 1981-2006 (14.25)                   | 100     | 66-84 (72.00) | White predominant          | Predominant                             | general population | 2357        | All-cause mortality was confirmed by medical records, autopsy reports and death certificates. | Smoking: 1. not current smokers; 0. current smokers.<br>PA: 1. not lack of exercise; 0. lack of exercise.<br>BMI: 1. not obese; 0. obesity.<br>Hypertension: 1. no; 0. yes.                                                                                                                                                                                                                                                                                                                                                                                                                                                                                                                                               | 6         |

| Author-year               | Cohort                         | Country     | Follow-up duration (mean or median) | Men (%) | Age (mean)    | Ethnicity (%)*    | Proportion of high school graduates (%) | Health status      | Sample size | Outcome attainment                                                      | Definition of healthy lifestyle                                                                                                                                                                                                                                                                                                                                                                                                                 | NOS score |
|---------------------------|--------------------------------|-------------|-------------------------------------|---------|---------------|-------------------|-----------------------------------------|--------------------|-------------|-------------------------------------------------------------------------|-------------------------------------------------------------------------------------------------------------------------------------------------------------------------------------------------------------------------------------------------------------------------------------------------------------------------------------------------------------------------------------------------------------------------------------------------|-----------|
| Yun-2012 <sup>150</sup>   | Korean Cancer Prevention Study | South Korea | 1994-2009 (10.30)                   | 53.14   | 30-84 (47.17) | Asian predominant | NA                                      | general population | 59941       | All-cause mortality was identified through National Statistical Office. | DM: 1. no; 0. yes.<br>5-point score:<br>Smoking: 1. never smokers or quitting ≥10 years; 0. current smokers or quitting <10 years.<br>Alcohol drinking (M/F): 1. ≤2/1 drinks/d; 0. >2/1 drinks/d.<br>PA: 1. ≥3 times/w; 0. <3 times/w.<br>BMI: 1. ≤25 kg/m <sup>2</sup> ; 0. >25 kg/m <sup>2</sup> .<br>Diet (fruit and vegetable consumption): 1. highest quartile; 0. lower three quartiles.<br>4-point score: smoking, drinking, PA and BMI. | 7         |
| Zhang-2017 <sup>151</sup> | Shanghai Men's Health Study    | China       | 2002-2013 (9.29)                    | 100     | 40-74 (55.34) | Asian predominant | 59.90                                   | general population | 59747       | All-cause mortality was identified through Shanghai Vital Statistics.   | Smoking: 1. never smokers or quitting ≥10 years; 0. current smokers or quitting <10 years.<br>Alcohol drinking: 1. ≤14 drinks/w; 0. >14 drinks/w.<br>PA: 1. MVPA ≥150 min/w (2 MET-h/d); 0. MVPA <150 min/w.<br>Diet (Chinese Food Pagoda score consisting of grains, vegetables, fruits, dairy, beans, meat and poultry, fish and shrimp, eggs, fats and oils, and salt, FFQ): 1. top three quintiles; 0. lower two quintiles.                 | 8         |
| Zhou-                     | The                            | China       | 1983-2005                           | 49.57   | 35-59         | Asian 100         | NA                                      | general            | 938         | All-cause mortality                                                     | Smoking: 1. never smokers; 0. ever                                                                                                                                                                                                                                                                                                                                                                                                              | 8         |

| Author-year         | Cohort                                                                                         | Country | Follow-up duration (mean or median) | Men (%) | Age (mean) | Ethnicity (%) <sup>*</sup> | Proportion of high school graduates (%) | Health status | Sample size | Outcome attainment                                                                                                              | Definition of healthy lifestyle                                                                                                                                                                                                                                                                                                                                                                                                                                                                | NOS score |
|---------------------|------------------------------------------------------------------------------------------------|---------|-------------------------------------|---------|------------|----------------------------|-----------------------------------------|---------------|-------------|---------------------------------------------------------------------------------------------------------------------------------|------------------------------------------------------------------------------------------------------------------------------------------------------------------------------------------------------------------------------------------------------------------------------------------------------------------------------------------------------------------------------------------------------------------------------------------------------------------------------------------------|-----------|
| 2018 <sup>152</sup> | People's Republic of China-USA Collaborative Study of Cardiovascular and Coronary Epidemiology |         | (20.30)                             |         | (45.80)    |                            |                                         | population    |             | was identified through death certificates or hospital records obtained from next-of-kin or local death registration department. | smokers.<br>PA: 1. took part in physical exercises regularly; 0. not took part in physical exercises regularly.<br>BMI: 1. <24 kg/m <sup>2</sup> ; 0. ≥24 kg/m <sup>2</sup> .<br>Diet (AHA, 24-h dietary recall): 1. 4-5 components; 0. 0-3 components.<br>SBP/DBP: 1. <120/80 mmHg (untreated); 0. <120/80 mmHg (treated) or ≥120/80 mmHg.<br>FBG: 1. <100 mg/dl (untreated); 0. <100 mg/dl (treated) or ≥100 mg/dl.<br>TC: 1. <200 mg/dl (untreated); 0. <200 mg/dl (treated) or ≥200 mg/dl. |           |

<sup>\*</sup> The percentage of ethnic groups may not sum to 100% since some participants belonged to the other ethnic groups or did not report the information.

<sup>†</sup> These studies were only used in stratified analyses.

<sup>‡</sup> This study also used a 5-point score, which integrated alcohol, fruit, fish, milk, vegetable, and bean intake as a diet item.

<sup>§</sup> The author provided updated analyses for all-cause mortality, cardiovascular disease mortality and cancer mortality, so the information and data were based on the updated analyses.

%E, percentage of total energy intake; ACS, American Cancer Society; AHA, American Heart Association; AHEI, Alternative Healthy Eating Index; aMDS, alternative Mediterranean diet score; BMI, body mass index; CHD, coronary heart disease; CRF, cardiorespiratory fitness; CVD, cardiovascular disease; DASH, Dietary Approaches to Stop Hypertension; DBP, diastolic blood pressure; DF, dietary fiber; eGFR, estimated glomerular filtration rate; FA, fatty acid; FBG, fasting blood glucose; FFQ, food frequency questionnaire; FPG, fasting plasma glucose; FSG, fasting serum glucose; HbA<sub>1c</sub>, glycosylated hemoglobin; HDL-c, high-density lipoprotein cholesterol; HEI, Healthy Eating Index; HF, heart failure; ICD, International Classification of Diseases; LPA, light physical activity; LTPA, leisure-time physical activity; M/F, for male and female respectively; MDS, Mediterranean diet score; MET, metabolic equivalent of task; mMDS, modified Mediterranean diet score; MPA, moderate physical activity; MVPA, moderate to vigorous physical activity; NA, not available; NOS, Newcastle–Ottawa Scale; PA, physical activity; SBP, systolic blood pressure; SFA, saturated fatty acid; SSB, sugar-sweetened beverage; TC, total cholesterol; UK, the United Kingdom; US, the United States; VPA, vigorous physical activity; WC, waist circumference; WHR, waist-to-hip ratio.

**Table A4.** Characteristics of studies related to cardiovascular disease mortality

| Author-year               | Cohort                                                              | Country | Follow-up duration (mean or median) | Men (%) | Age (mean)    | Ethnicity (%)*    | Proportion of high school graduates (%) | Health status      | Sample size | Outcome attainment                                                                                                                                                                                                                                                                 | Definition of healthy lifestyle                                                                                                                                                                                                                                                                                                                                                                                                                                                                                                                                                                            | NOS score |
|---------------------------|---------------------------------------------------------------------|---------|-------------------------------------|---------|---------------|-------------------|-----------------------------------------|--------------------|-------------|------------------------------------------------------------------------------------------------------------------------------------------------------------------------------------------------------------------------------------------------------------------------------------|------------------------------------------------------------------------------------------------------------------------------------------------------------------------------------------------------------------------------------------------------------------------------------------------------------------------------------------------------------------------------------------------------------------------------------------------------------------------------------------------------------------------------------------------------------------------------------------------------------|-----------|
| Artero-2012<br>†, 76      | Aerobics Center Longitudinal Study                                  | US      | 1987-2003 (11.60)                   | 75.67   | 20-88 (46.00) | White >99.00      | >70.00                                  | general population | 11993       | CVD mortality (ICD-9, 390-449.9; ICD-10, I00-I78) was identified through the National Death Index and death certificates.                                                                                                                                                          | Smoking: 1. never smokers; 0. ever smokers;<br>PA: 1. $\geq 500$ MET-min/w; 0. $< 500$ MET-min/w.<br>BMI: 1. 18.5-24.9 kg/m <sup>2</sup> ; 0. $\geq 25$ kg/m <sup>2</sup> .<br>Diet (AHA, 3-d dietary record): 1. 3-4 components; 0. 0-2 components.<br>SBP/DBP: 1. $< 120$ and 80 mmHg (not treated); 0. $< 120$ and 80 mmHg (treated) or $\geq 120$ or 80 mmHg.<br>FPG: 1. $< 100$ mg/dl (not treated); 0. $< 100$ mg/dl (treated) $\geq 100$ mg/d.<br>TC: 1. $< 200$ mg/dl (not treated); 0. $\geq 200$ mg/dl (treated).                                                                                | 9         |
| Berard-2017 <sup>78</sup> | MONITORing trends and determinants of Cardiovascular disease-France | France  | 1994-2013 (18.00)                   | 73.00   | 35-64 (51.47) | White predominant | 32.30                                   | general population | 1311        | Death were identified through National Identification Register of Private Individuals, and main and associated causes of death were provided by the French National Institute of Health Research. Death from a CVD cause included hypertension, IHD, conduction disorders, cardiac | Smoking: 6. never smokers; 5. former smokers; 3. current smokers smoking 1-8 cig/d; 2. current smokers smoking 9-15 cig/d; 1. current smokers smoking 17-20 cig/d; 0. current smokers smoking 23-60 cig/d.<br>Alcohol drinking (M/F): 2. 1-2/1 drink/d; 1. teetotalers; -1. $\geq 3/2$ drinks/d.<br>PA: 2. intense PA $\geq 20$ min/episode and $\geq 3$ episodes/w; 1.5. intense PA $\geq 20$ min/episode and 1-2 episodes/w; 1. light PA almost every week; 0. no regular PA.<br>BMI: 2. $< 25.0$ kg/m <sup>2</sup> ; 1.5. 25.0-29.9 kg/m <sup>2</sup> ; 1. 30.0-39.9 kg/m <sup>2</sup> ; 0. $\geq 40.0$ | 9         |

| Author-year                 | Cohort          | Country | Follow-up duration (mean or median) | Men (%) | Age (mean)    | Ethnicity (%)*    | Proportion of high school graduates (%) | Health status      | Sample size | Outcome attainment                                                                                                                                                                                                               | Definition of healthy lifestyle                                                                                                                                                                                                                                                                                                                                                                                                                                                                                                                                                                                                                                                                                                                                                                                                                                           | NOS score |
|-----------------------------|-----------------|---------|-------------------------------------|---------|---------------|-------------------|-----------------------------------------|--------------------|-------------|----------------------------------------------------------------------------------------------------------------------------------------------------------------------------------------------------------------------------------|---------------------------------------------------------------------------------------------------------------------------------------------------------------------------------------------------------------------------------------------------------------------------------------------------------------------------------------------------------------------------------------------------------------------------------------------------------------------------------------------------------------------------------------------------------------------------------------------------------------------------------------------------------------------------------------------------------------------------------------------------------------------------------------------------------------------------------------------------------------------------|-----------|
| Bonaccio-2019 <sup>79</sup> | Moli-sani Study | Italy   | 2005-2015 (8.20)                    | 47.7    | 35-NA (55.00) | White predominant | >12.90                                  | General population | 22839       | dysrhythmias, HF, atherosclerotic cerebrovascular disease, atherosclerosis, and sudden death.<br><br>CVD mortality (ICD-9, 390-459) was assessed by the Italian mortality registry, and validated by Italian death certificates. | kg/m <sup>2</sup> .<br>Diet (score consisting of sugar, FA, DF, fruits, vegetables, fish and sodium consumption, 3-day food record): 4. most adherent quartile; 3. second adherent quartile; 2. third adherent quartile; 1. least adherent quartile.<br>SBP/DBP: 3. <120 and 80 mmHg; 2.5. 120-129 or 80-84 mmHg; 2. 130-139 or 85-89 mmHg; 1.5. 140-159 or 90-99 mmHg; 1. 160-179 or 100-109 mmHg; 0. ≥180 or ≥110 mmHg.<br>FBG: 3. 2.75-4.92 mmol/l; 2. 4.93-5.38 mmol/l; 1. 5.39-5.88 mmol/l; 0. 5.89-18.82 mmol/l.<br>HDL-c: 2. 1.86-3.50 mmol/l; 0. 1.58-1.85 mmol/l; -1. 1.33-1.57 mmol/l; -2. 0.35-1.32 mmol/l.<br>Smoking: 1. abstention from smoking; 0. current smoking.<br>PA: 1. LTPA ≥30 min/d; 0. LTPA <30 min/d.<br>WHR (M/F): 1. <0.90/0.85; 0. ≥0.90/0.85.<br>Diet (MDS, FFQ): 1. above the sex-specific medians; 0. not above the sex-specific medians. | 9         |

| Author-year                  | Cohort                    | Country | Follow-up duration (mean or median) | Men (%) | Age (mean)    | Ethnicity (%)*    | Proportion of high school graduates (%) | Health status        | Sample size | Outcome attainment                                                      | Definition of healthy lifestyle                                                                                                                                                                                                                                                                                                                                                                                                                                                                                                                                                                                                                                           | NOS score |
|------------------------------|---------------------------|---------|-------------------------------------|---------|---------------|-------------------|-----------------------------------------|----------------------|-------------|-------------------------------------------------------------------------|---------------------------------------------------------------------------------------------------------------------------------------------------------------------------------------------------------------------------------------------------------------------------------------------------------------------------------------------------------------------------------------------------------------------------------------------------------------------------------------------------------------------------------------------------------------------------------------------------------------------------------------------------------------------------|-----------|
| Breslow-1980 <sup>47</sup>   | "Alameda cohort"          | US      | 1965-1974 (8.61)                    | 44.22   | NA (<53.28)   | White 84.00       | NA                                      | general population   | 4864        | CVD mortality (ICD-8, 140-209) was identified through active follow-up. | Smoking: 1. never smokers; 0. ever smokers.<br>Alcohol drinking: 1. ≤4 drinks/episode; 0. >4 drinks/episode.<br>PA: 1. often or sometimes engage in active sports, swim or take long walks, or often garden or do physical exercises; 0. not often or sometimes engage in active sports, swim or take long walks, or often garden or do physical exercises.<br>BMI (M/F): 1. between 20%-95%/10%-90% desirable weight for height; 0. <20%/10% or >95%/90% desirable weight for height.<br>Diet (eating breakfast almost every day): 1. yes; 0. no.<br>Diet (eating between meals once in a while, rarely or never): 1. yes; 0. no.<br>Sleep: 1. 7-8 h/d; 0. <7 or >8 h/d. | 5         |
| Cerhan-2004 <sup>†, 84</sup> | Iowa Women's Health Study | US      | 1986-1998 (11.39)                   | 0       | 55-69 (61.70) | White predominant | 86.10                                   | postmenopausal women | 29838       | CVD mortality were determined by linkage to Iowa death certificates.    | Alcohol drinking: 1. <1 drink/d (14 g/d); 0. ≥1 drinks/d.<br>PA: 1. exercise moderately daily and vigorously ≥1 h/w; 0. exercise moderately <once /d or vigorously <1 h/w.<br>BMI: 1. ≤25.0 kg/m <sup>2</sup> ; 0. >25.0 kg/m <sup>2</sup> .<br>Weight gain since age 18: 1. <11 pounds; 0. ≥11 pounds.<br>Diet (vegetable and fruit intake excluding pulses and starchy, FFQ): 1. ≥5 servings/d; 0. <5 servings/d.<br>Diet (complex carbohydrates intake, FFQ): 1. ≥400 g/d; 0. <400 g/d.                                                                                                                                                                                | 7         |



| Author-year                   | Cohort                    | Country | Follow-up duration (mean or median) | Men (%) | Age (mean)    | Ethnicity (%) <sup>*</sup> | Proportion of high school graduates (%) | Health status      | Sample size | Outcome attainment                                                                                                                                                                                             | Definition of healthy lifestyle                                                                                                                                                                                                                                                                                                                                                                                                                                                                              | NOS score |
|-------------------------------|---------------------------|---------|-------------------------------------|---------|---------------|----------------------------|-----------------------------------------|--------------------|-------------|----------------------------------------------------------------------------------------------------------------------------------------------------------------------------------------------------------------|--------------------------------------------------------------------------------------------------------------------------------------------------------------------------------------------------------------------------------------------------------------------------------------------------------------------------------------------------------------------------------------------------------------------------------------------------------------------------------------------------------------|-----------|
| Cheng-2018 <sup>86</sup>      | Iowa Women's Health Study | US      | 1986-2012 (≥16.63)                  | 0       | 55-69 (61.70) | White predominant          | 86.10                                   | General population | 35221       | Deaths were identified through the State Health Registry of Iowa and the National Death Index. CVD mortality was defined using ICD-9 codes 390–459 and ICD-10 codes I00–I99.                                   | Diet (red meat intake, FFQ): 1. <80 g/d; 0. ≥ 80g/d.<br>Diet (consumption of fat as percentage total calories, FFQ): 1. ≤30%; 0. >30%.<br>Diet (sodium, FFQ): 1. <2400 mg/d; 0. ≥2400 mg/d.<br>Smoking: 5. never smokers; 2.14. former smokers; 0.45. current smokers.<br>PA: 7.69. VPA ≥twice/w or MPA >4 times/w; 4.62.VPA once/w plus MPA once/w, or MPA 2–4 times/w; 1. no VPA or MPA <twice/w.<br>BMI: 5. <25.0 kg/m <sup>2</sup> ; 2.91. 25.0–29.9 kg/m <sup>2</sup> ; 0.78. ≥30.0 kg/m <sup>2</sup> . | 8         |
| Chiuvè-2011 <sup>†, 153</sup> | Nurses' Health Study      | US      | 1984-2010 (NA)                      | 0       | 38-63 (50.74) | White predominant          | Predominant                             | general population | 81722       | Sudden cardiac deaths (the death or cardiac arrest occurred within one hour of symptom onset) were confirmed through reviews of medical records and autopsy reports, and further ascertained with next of kin. | Smoking: 1. not current smokers; 0. current smokers.<br>PA: 1. MVPA ≥30 min/d; 0. MVPA <30 min/d.<br>BMI: 1. <25 kg/m <sup>2</sup> ; 0. ≥25 kg/m <sup>2</sup> .<br>Diet (aMDS, FFQ): 1. top 40%; 0. lower 60%.                                                                                                                                                                                                                                                                                               | 8         |

| Author-year             | Cohort                                                  | Country | Follow-up duration (mean or median) | Men (%) | Age (mean)     | Ethnicity (%)*             | Proportion of high school graduates (%) | Health status                                         | Sample size | Outcome attainment                                                                                                                                                                                                                                                                         | Definition of healthy lifestyle                                                                                                                                                                                                                                                                                                                                                                                                                                                                                                                                                                                                           | NOS score |
|-------------------------|---------------------------------------------------------|---------|-------------------------------------|---------|----------------|----------------------------|-----------------------------------------|-------------------------------------------------------|-------------|--------------------------------------------------------------------------------------------------------------------------------------------------------------------------------------------------------------------------------------------------------------------------------------------|-------------------------------------------------------------------------------------------------------------------------------------------------------------------------------------------------------------------------------------------------------------------------------------------------------------------------------------------------------------------------------------------------------------------------------------------------------------------------------------------------------------------------------------------------------------------------------------------------------------------------------------------|-----------|
| Diaz-2014 <sup>88</sup> | Reasons for Geographic and Racial Differences in Stroke | US      | 2003-NA (4.50)                      | 49.20   | 45-NA (67.60)  | White 39.50<br>Black 60.50 | 80.80                                   | apparent treatment-resistant hypertension on patients | 2043        | CVD events (fatal CVD events including death within 28 days of a definite or probable MI or sudden death or a confirmed stroke, and non-fatal CVD events including non-fatal definite or probable MI or stroke) were identified through interviews of participants, proxy, or next-of-kin. | Smoking: 1. not current smokers; 0. current smokers.<br>Alcohol drinking (M/F): 1. 1-14/7 drinks/w; 0. <1 drink/w or >14/7 drinks/w.<br>PA: 1. $\geq 4$ d/w; 0. <4 d/w.<br>WC (M/F): 1. $\leq 102/88$ cm; 0. >102/88 cm.<br>Diet (DASH score, FFQ): 1. highest quartile ( $\geq 27$ points); 0. lower three quartiles (<27 points).<br>Diet (sodium and potassium intake, FFQ): 1. lowest quartile ( $\leq 0.71$ g/d); 0. higher three quartiles (>0.71 g/d).                                                                                                                                                                             | 7         |
| Dong-2012 <sup>90</sup> | Northern Manhattan Study                                | US      | 1993-2011 (11.00)                   | 36.30   | 40-107 (69.00) | White 75.00<br>Black 24.99 | 43.20                                   | general population                                    | 2981        | CVD mortality including stroke, MI, HF, cardiac arrhythmia was identified through death certificates, medical records of hospitalizations, family interviews and primary care physicians.                                                                                                  | Smoking: 1. never smokers or quitting >1 year; 0. quitting $\leq 1$ year or current smokers;<br>PA: 1. MPA $\geq 150$ min/w or VPA $\geq 75$ min/w or MVPA $\geq 150$ min/w; 0. MPA <150 min/w and VPA <75 min/w and MVPA <150 min/w.<br>BMI: 1. <25 kg/m <sup>2</sup> ; 0. $\geq 25$ kg/m <sup>2</sup> .<br>Diet (AHA, FFQ): 1. 4-5 components; 0. 0-3 components.<br>SBP/DBP: 1. <120 and 80 mmHg (not treated); 0. <120 and 80 mmHg (treated) or $\geq 120$ or 80 mmHg.<br>FPG: 1. <100 mg/dl (not treated); 0. <100 mg/dl (treated) $\geq 100$ mg/d.<br>TC: 1. <200 mg/dl (not treated); 0. or <200 mg/dl (treated) $\geq 200$ mg/dl. | 98        |

| Author-year               | Cohort                           | Country | Follow-up duration (mean or median) | Men (%) | Age (mean)    | Ethnicity (%) <sup>*</sup> | Proportion of high school graduates (%) | Health status      | Sample size | Outcome attainment                                                                                                                                 | Definition of healthy lifestyle                                                                                                                                                                                                                                                                                                                                                                                                                                                       | NOS score |
|---------------------------|----------------------------------|---------|-------------------------------------|---------|---------------|----------------------------|-----------------------------------------|--------------------|-------------|----------------------------------------------------------------------------------------------------------------------------------------------------|---------------------------------------------------------------------------------------------------------------------------------------------------------------------------------------------------------------------------------------------------------------------------------------------------------------------------------------------------------------------------------------------------------------------------------------------------------------------------------------|-----------|
| Eguchi-2012<br>†, 154     | Japan Collaborative Cohort Study | Japan   | 1988-2006 (16.50)                   | 43.59   | 40-79 (55.88) | Asian predominant          | 63.88                                   | general population | 43010       | Cause and date of death were determined by reviewing death certificates. ICD-10 for stroke, CHD, and total CVD were I60-I69, I20-I25, and I01-I99. | Smoking: 1. not current smokers; 0. current smokers.<br>Alcohol drinking: 1. <46 g/d; 0. ≥46 g/d.<br>PA: 1. sports ≥5 h/w or walking >1 h/d; 0. sports <5 h/w and walking ≤1 h/d.<br>BMI: 1. 21-25 kg/m <sup>2</sup> ; 0. <21 kg/m <sup>2</sup> or >25 kg/m <sup>2</sup> .<br>Diet (fruit): 1. ≥1 servings/d; 0. <1 serving/d.<br>Diet (fish): 1. ≥1 servings/d; 0. <1 serving/d.<br>Diet (milk): 1. almost daily; 0. <once /d.<br>Sleeping: 1. 5.5-7.5 h/d; 0. <5.5 h/d or >7.5 h/d. | 8         |
| Eguchi-2014<br>†, 155     | Japan Collaborative Cohort Study | Japan   | 1988-2009 (19.30)                   | 43.61   | 40-79 (55.24) | Asian predominant          | 63.88                                   | general population | 42946       | Cause and date of death were determined by reviewing death certificates. ICD-10 for stroke, CHD, and total CVD were I60-I69, I20-I25, and I01-I99. | Smoking: 1. not current smokers; 0. current smokers.<br>Alcohol drinking: 1. <46 g/d; 0. ≥46 g/d.<br>PA: 1. sports ≥5 h/w or walking >0.5 h/d; 0. sports <5 h/w and walking ≤0.5 h/d.<br>Diet (fruit): 1. ≥1 servings/d; 0. <1 serving/d.<br>Diet (fish): 1. ≥1 servings/d; 0. <1 serving/d.<br>Diet (milk): 1. almost daily; 0. <once /d.<br>Sleeping: 1. 5.5-7.4 h/d; 0. <5.5 h/d or >7.4 h/d.                                                                                      | 9         |
| Eguchi-2017 <sup>51</sup> | Japan Collaborative Cohort Study | Japan   | 1988-2009 (19.30)                   | 43.24   | 40-79 (55.52) | Asian predominant          | 63.88                                   | general population | 42647       | Cause and date of death were                                                                                                                       | Smoking: 1. not current smokers; 0. current smokers.                                                                                                                                                                                                                                                                                                                                                                                                                                  | 8         |

| Author-year                 | Cohort                       | Country | Follow-up duration (mean or median) | Men (%) | Age (mean)    | Ethnicity (%)*             | Proportion of high school graduates (%) | Health status      | Sample size | Outcome attainment                                                                                                                                                                                                                                                                                                                                  | Definition of healthy lifestyle                                                                                                                                                                                                                                                                                                                                                                                                                                                                                                                                                                                                                                                                                                | NOS score |
|-----------------------------|------------------------------|---------|-------------------------------------|---------|---------------|----------------------------|-----------------------------------------|--------------------|-------------|-----------------------------------------------------------------------------------------------------------------------------------------------------------------------------------------------------------------------------------------------------------------------------------------------------------------------------------------------------|--------------------------------------------------------------------------------------------------------------------------------------------------------------------------------------------------------------------------------------------------------------------------------------------------------------------------------------------------------------------------------------------------------------------------------------------------------------------------------------------------------------------------------------------------------------------------------------------------------------------------------------------------------------------------------------------------------------------------------|-----------|
|                             | ative Cohort Study           |         |                                     |         |               |                            |                                         |                    |             | determined by reviewing death certificates. ICD-10 for stroke, CHD, and total CVD were I60-I69, I20-I25, and I01-I99.                                                                                                                                                                                                                               | Alcohol drinking: 1. <2 gou/d (46g ethanol/d); 0. ≥2 gou/d.<br>PA: 1. ≥0.5 h/d or ≥5 h/w; 0. <0.5 h/d and <5 h/w.<br>BMI: 1. 21-25 kg/m <sup>2</sup> ; 0. <21 kg/m <sup>2</sup> or >25 kg/m <sup>2</sup> .<br>Diet (fruit): 1. ≥1 servings/d; 0. <1 serving/d.<br>Diet (fish): 1. ≥1 servings/d; 0. <1 serving/d.<br>Diet (milk): 1. almost daily; 0. <once /d.<br>Sleeping: 1. 5.5-7.4 h/d; 0. <5.5 h/d or >7.4 h/d. ‡<br>Smoking: 1. not current smokers; 0. current smokers.<br>Alcohol drinking (M/F): 1. 1-21/14 units/w; 0. <1 or >21/14 units/w.<br>PA: 1. MPA ≥5 h/w or VPA ≥2.5 h/w; 0. MPA <5 h/w and VPA <2.5 h/w.<br>Diet (vegetables and fruits, simple dietary questionnaire): 1. ≥5.5 times/w; 0. <5.5 times/w. |           |
| Eriksen-2015 <sup>156</sup> | Southall and Brent Revisited | UK      | 1988-2011 (21.00)                   | 84.56   | 40-69 (52.09) | White 52.00<br>Asian 48.00 | NA                                      | general population | 2096        | CVD mortality including fatal CHD (deaths caused from angina, MI or its sequelae or atherosclerotic heart disease. ICD-9, 410-415; ICD-10, I200-I259) and fatal stroke (deaths caused from following ICD-9 codes 430-439 or ICD-10 codes I600-I698), were identified through health and lifestyle questionnaires, medical record review, attendance |                                                                                                                                                                                                                                                                                                                                                                                                                                                                                                                                                                                                                                                                                                                                | 7         |

| Author-year                              | Cohort                                                 | Country | Follow-up duration (mean or median) | Men (%) | Age (mean)    | Ethnicity (%)*             | Proportion of high school graduates (%) | Health status      | Sample size | Outcome attainment                                                                                                                                                                                             | Definition of healthy lifestyle                                                                                                                                                                                                                                                                                                                                                                         | NOS score |
|------------------------------------------|--------------------------------------------------------|---------|-------------------------------------|---------|---------------|----------------------------|-----------------------------------------|--------------------|-------------|----------------------------------------------------------------------------------------------------------------------------------------------------------------------------------------------------------------|---------------------------------------------------------------------------------------------------------------------------------------------------------------------------------------------------------------------------------------------------------------------------------------------------------------------------------------------------------------------------------------------------------|-----------|
| Fazel-Tabar Malekshah-2016 <sup>93</sup> | Golestan Cohort                                        | Iran    | 2004-2015 (8.08)                    | 42.75   | 40-75 (51.54) | White >75.59               | <31.10                                  | general population | 40708       | at a study clinic visit, and the Office of National Statistics. CVD mortality (ICD-10, not reported) was identified through active follow-up, and confirmed by verbal autopsy and extensive medical documents. | Smoking: 1. never smokers; 0. ever smokers.<br>PA: 1. MVPA $\geq$ 30 min/d; 0. MVPA <30 min/d.<br>Diet (AHEI, FFQ): 1. highest 40%; 0. lower 60%.                                                                                                                                                                                                                                                       | 8         |
| Ford-2011 <sup>45</sup>                  | National Health and Nutrition Examination Surveys III  | US      | 1988-2006 (NA)                      | 46.75   | 17-NA (59.00) | White 81.10<br>Black 11.10 | 61.88                                   | general population | 16958       | Major CVD mortality (ICD-10, I00-I78) was identified through the National Death Index.                                                                                                                         | Smoking: 1. <100 cigarettes; 0. $\geq$ 100 cigarettes.<br>Alcohol drinking (M/F): 1. 0.1-59.9/29.9 drinks/m; 0. none or $\geq$ 60/30 drinks/m.<br>PA: 1. VPA $\geq$ 3 times/w or MPA $\geq$ 5 times/w; 0. VPA <3 times/w and MPA <5 times/w.<br>Diet (a single 24-h recall, HEI): 1. top 40%; 0. lower 60%.                                                                                             | 8         |
| Ford-2012 (1) <sup>94</sup>              | National Health and Nutrition Examination Surveys 1999 | US      | 1999-2006 (5.80)                    | 47.69   | 20-NA (45.79) | White 72.22                | 52.90                                   | general population | 7622        | CVD mortality was identified through the National Death Index.                                                                                                                                                 | Smoking: 1. quitting >12 m or never smokers; 0. quitting $\leq$ 12 m or current smokers.<br>PA: 1. MVPA $\geq$ 150 min/w; 0. MVPA <150 min/w.<br>BMI: 1. <25 kg/m <sup>2</sup> ; 0. $\geq$ 25 kg/m <sup>2</sup> .<br>Diet (single 24-h recall, HEI): 1. $\geq$ 81 points; 0. <81 points.<br>TC: 1. <200 mg/dl (untreated); 0. <200 mg/dl (treated) or $\geq$ 200 mg/dl.<br>SBP/DBP: 1. <120 and 80 mmHg | 8         |

| Author-year                    | Cohort                                                 | Country | Follow-up duration (mean or median) | Men (%) | Age (mean)    | Ethnicity (%)*             | Proportion of high school graduates (%) | Health status      | Sample size | Outcome attainment                                                                                            | Definition of healthy lifestyle                                                                                                                                                                                                                                                                                                                                                                                                                                                                                                                                                                                                                | NOS score |
|--------------------------------|--------------------------------------------------------|---------|-------------------------------------|---------|---------------|----------------------------|-----------------------------------------|--------------------|-------------|---------------------------------------------------------------------------------------------------------------|------------------------------------------------------------------------------------------------------------------------------------------------------------------------------------------------------------------------------------------------------------------------------------------------------------------------------------------------------------------------------------------------------------------------------------------------------------------------------------------------------------------------------------------------------------------------------------------------------------------------------------------------|-----------|
| Ford-2012 (2) <sup>†, 95</sup> | National Health and Nutrition Examination Surveys 1999 | US      | 1999-2006 (5.70)                    | 50.11   | 20-NA (45.60) | White 72.64<br>Black 19.15 | 52.90                                   | general population | 8375        | CVD mortality (ICD-10, I00-I78) was identified through the National Death Index.                              | (untreated); 0. <120/80 mmHg (treated) or ≥120/80 mmHg.<br>HbA1c: 1. <5.7%; 0. ≥5.7%.<br>Smoking: 1. not current smokers; 0. current smokers.<br>PA: 1. MVPA ≥150 min/w; 0. MVPA <150 min/w.<br>Diet (HEI, a single 24-h recall): 1. top 40%; 0. lower 60%.                                                                                                                                                                                                                                                                                                                                                                                    | 8         |
| Foster-2018 <sup>96</sup>      | UK Biobank                                             | UK      | 2006-2015 (4.90)                    | 45.41   | 40-69 (55.71) | White 94.79                | 46.10                                   | General population | 328594      | Deaths were obtained from death certificates held by the NHS Information Centre and the NHS Central Register. | Smoking: 1. not current smokers; 0. current smokers.<br>Alcohol drinking: 1. not consume (almost) daily; 0. consume (almost) daily.<br>PA: 1. MPA ≥150 min/w or VPA ≥75 min/w; 0. MPA <150 min/w and VPA <75 min/w.<br>Diet (fruits and vegetables, 24-h dietary recall): 1. ≥400 g/d; 0. <400 g/d.<br>Diet (oily fish, 24-h dietary recall): 1. ≥one portion/w; 0. <one portion/w.<br>Diet (red meat, 24-h dietary recall): 1. ≤3 portions/w; 0. >3 portions/w.<br>Diet (processed meat, 24-h dietary recall): 1. ≤1 portions/w; 0. >1 portions/w.<br>Television viewing: 1. <4 h/d; 0. ≥4 h/d.<br>Sleeping: 1. 7-9 h/d; 0. <7 h/d or >9 h/d. | 8         |

| Author-year                 | Cohort                      | Country   | Follow-up duration (mean or median) | Men (%) | Age (mean)    | Ethnicity (%)*             | Proportion of high school graduates (%) | Health status      | Sample size | Outcome attainment                                                                                                                                                                                                                                                           | Definition of healthy lifestyle                                                                                                                                                                                                                                                                                                                                                                                                                                                                                                                                                                                                                                                                                                                                                                                                                                                                                                   | NOS score |
|-----------------------------|-----------------------------|-----------|-------------------------------------|---------|---------------|----------------------------|-----------------------------------------|--------------------|-------------|------------------------------------------------------------------------------------------------------------------------------------------------------------------------------------------------------------------------------------------------------------------------------|-----------------------------------------------------------------------------------------------------------------------------------------------------------------------------------------------------------------------------------------------------------------------------------------------------------------------------------------------------------------------------------------------------------------------------------------------------------------------------------------------------------------------------------------------------------------------------------------------------------------------------------------------------------------------------------------------------------------------------------------------------------------------------------------------------------------------------------------------------------------------------------------------------------------------------------|-----------|
| Gopinath-2010 <sup>97</sup> | Blue Mountains Eye Study    | Australia | 1992-2007 (NA)                      | NA      | 49-NA (NA)    | NA                         | NA                                      | general population | 2283        | CVD mortality was assessed using ICD-9 and identified through the Australian National Death Index data.                                                                                                                                                                      | Smoking: 1. not current smokers; 0. current smokers.<br>Alcohol drinking (M/F): 1. $\leq 21/14$ units/w; 0. $> 21/14$ units/w.<br>PA: 1. $\geq 3$ times/w; 0. $< 3$ times/w.<br>Diet (fruits and vegetables consumption): 1. $\geq 3$ times/d; 0. $< 3$ times/d.                                                                                                                                                                                                                                                                                                                                                                                                                                                                                                                                                                                                                                                                  | 8         |
| Greenlee-2017 <sup>98</sup> | Cardiovascular Health Study | US        | 1989-2011 (15.00)                   | 38.56   | 65-98 (72.00) | White 86.71<br>Black 11.72 | 72.91                                   | general population | 3491        | CVD deaths included atherosclerotic coronary disease, CBVD, other atherosclerotic disease (such as aortic aneurysm), and other vascular disease (such as valvular heart disease or PE), and were identified from National Death Index and interviews with proxy respondents. | ACS:<br>Smoking: 2. never smokers or quitting $> 1$ year; 1. quitting $\leq 1$ year; 0. current smokers.<br>Alcohol drinking (M/F): 2. non-drinker; 1. $< 2/1$ unit/d; 0. $> 2/1$ unit/d.<br>PA: 2. LTPA $\geq 8.75$ MET-h/w; 1. LTPA 0.10-8.74 MET-h/w; 0. zero MET-h/w.<br>BMI: 2. $< 25$ kg/m <sup>2</sup> at baseline and age 50; 1. 25-29.9 kg/m <sup>2</sup> at baseline and $< 30$ kg/m <sup>2</sup> at age 50, or 25-29.9 kg/m <sup>2</sup> at age 50 and $< 30$ kg/m <sup>2</sup> at baseline; 0. $\geq 30$ kg/m <sup>2</sup> either baseline, age 50, or both.<br>Diet (ACS, including vegetables and fruits, red and processed meats, and whole grains consumption, FFQ): 2. $\geq 6$ score; 1. 3-5 score; 0. $< 3$ score.<br>AHA:<br>Smoking: 2. never smokers or quitting $> 1$ year; 1. quitting $\leq 1$ year; 0. current smokers.<br>PA: 2. LTPA $\geq 8.75$ MET-h/w; 1. LTPA 0.10-8.74 MET-h/w; 0. zero MET-h/w. | 8         |

| Author-year              | Cohort                                     | Country | Follow-up duration (mean or median) | Men (%) | Age (mean)     | Ethnicity (%)*    | Proportion of high school graduates (%) | Health status      | Sample size | Outcome attainment                                                                                              | Definition of healthy lifestyle                                                                                                                                                                                                                                                                                                                                                                                                                                                                                                                                                                                                                                                                                                                               | NOS score |
|--------------------------|--------------------------------------------|---------|-------------------------------------|---------|----------------|-------------------|-----------------------------------------|--------------------|-------------|-----------------------------------------------------------------------------------------------------------------|---------------------------------------------------------------------------------------------------------------------------------------------------------------------------------------------------------------------------------------------------------------------------------------------------------------------------------------------------------------------------------------------------------------------------------------------------------------------------------------------------------------------------------------------------------------------------------------------------------------------------------------------------------------------------------------------------------------------------------------------------------------|-----------|
| Hamer-2011 <sup>99</sup> | National Diet and Nutrition Survey         | UK      | NA-2008 (9.20)                      | 50.75   | 65-99 (76.50)  | White predominant | NA                                      | general population | 1062        | CVD mortality was identified through National Health Service administrative mortality data.                     | BMI: 2. <25 kg/m <sup>2</sup> ; 1. 25-29.9 kg/m <sup>2</sup> ; 0. ≥30 kg/m <sup>2</sup> .<br>Diet (AHA, FFQ): 2. 4-5 components; 1. 2-3 components; 0. 0-1 components.<br>SBP/DBP: 2. <120 and 80 mmHg (untreated); 1. 120-139 or 80-89 mmHg (untreated) or <120 and 80 mmHg (treated); 0. ≥140 or 90 mmHg.<br>FPG: 2. <100 mg/dl (untreated); 1. 100-125 mg/dl (untreated) or <100 mg/dl (treated); 0. ≥126 mg/dl.<br>TC: 2. <200 mg/dl (untreated); 1. 200-239 mg/dl (untreated) or <200 mg/dl (treated); 0. ≥ 240 mg/dl.<br>Smoking: 1. never smokers; 0. ever smokers.<br>Alcohol drinking (M/F): 1. 1-21/14 units/w; 0. zero or >21/14 units/w.<br>PA: 1. regular MVPA; 0. irregular or no MVPA.<br>Diet (daily vitamin C intake): 1. ≥50 mU; 0. <50 mU. | 8         |
| Han-2018 <sup>157</sup>  | Prediction for ASCVD Risk in China project | China   | 1998-2015 (7.24)                    | 40.22   | 20->65 (51.64) | Asian 100         | NA                                      | general population | 93987       | ASCVD mortality was death caused by ASCVD, which was identified through hospital records or death certificates. | 7-point score:<br>Smoking: 1. never smokers or former smokers quitting >12 m; 0. current smokers or former smokers quitting ≤12 m.<br>PA: 1. MPA ≥150 min/w or VPA ≥75 min/w or MVPA ≥150 min/w; 0. MPA <150 min/w and VPA <75 min/w and MVPA <150 min/w.<br>BMI: 1. <25 kg/m <sup>2</sup> ; 0. ≥25 kg/m <sup>2</sup> .                                                                                                                                                                                                                                                                                                                                                                                                                                       | 9         |



| Author-year                          | Cohort                                                  | Country     | Follow-up duration (mean or median) | Men (%) | Age (mean)    | Ethnicity (%)*    | Proportion of high school graduates (%) | Health status      | Sample size | Outcome attainment                                                                                                                                          | Definition of healthy lifestyle                                                                                                                                                                                                                                                                                                                                                                                                                                                                                                                                                                                                                                                                                                                                                                                                                                                                                                                                                                                                                                                                              | NOS score |
|--------------------------------------|---------------------------------------------------------|-------------|-------------------------------------|---------|---------------|-------------------|-----------------------------------------|--------------------|-------------|-------------------------------------------------------------------------------------------------------------------------------------------------------------|--------------------------------------------------------------------------------------------------------------------------------------------------------------------------------------------------------------------------------------------------------------------------------------------------------------------------------------------------------------------------------------------------------------------------------------------------------------------------------------------------------------------------------------------------------------------------------------------------------------------------------------------------------------------------------------------------------------------------------------------------------------------------------------------------------------------------------------------------------------------------------------------------------------------------------------------------------------------------------------------------------------------------------------------------------------------------------------------------------------|-----------|
| Hoevenaar-Blom-2014 <sup>†,158</sup> | Monitoring Project on Risk Factors for Chronic Diseases | Netherlands | 1994-2008 (12.00)                   | 45.58   | 20-65 (42.00) | White predominant | 53.44                                   | general population | 14639       | CVD mortality (ICD-10, I00-I99, G45, and R96) was identified through municipal population registries and "Statistics Netherlands".                          | Diet (AHA, FFQ): 1. 4-5 components; 0-3 components.<br>SBP/DBP: 1. <120/80 mmHg (untreated); 0. <120/80 mmHg (treated) or ≥120/80 mmHg.<br>FBG: 1. <100 mg/dl (untreated); 0. <100 mg/dl (treated) or ≥100 mg/dl.<br>TC: 1. <200 mg/dl (untreated); 0. <200 mg/dl (treated) or ≥200 mg/dl.<br>4-point score: smoking, PA, BMI, and diet.<br>5-point score:<br>Smoking: 1. not current smokers; 0. current smokers.<br>Alcohol drinking: 1. <1 glass/m; 0. ≥1 glass/m.<br>PA: 1. ≥3.5 h/w cycling and sports; 0. <3.5 h/w cycling and sports.<br>Diet (MDS, FFQ): 1. 5-8; 0. 0-4.<br>Sleep: 1. ≥7 h; 0. <7 h.<br>4-point score: without sleep<br>Alcohol drinking: 1. ≤10.0 g/d; 0.5. 10.1-20.0 g/d; 0. >20.0 g/d.<br>PA: 1. ≥30.0 min/d; 0.5. 0.1-29.9 min/d; 0. none.<br>BMI: 1. 18.5-24.9 kg/m <sup>2</sup> ; 0.5. 25.0-29.9 kg/m <sup>2</sup> ; 0. ≥30.0 kg/m <sup>2</sup> .<br>Diet (SSB, FFQ): 1. zero g/d; 0.5. <250 g/d; 0. ≥250 g/d.<br>Diet (fruit and vegetable, FFQ): 1. ≥5 servings/d; 0.5. 3-4 servings/d; 0. <3 servings/d.<br>Diet (DF, FFQ): 1. ≥25.0 g/d; 0.5. 12.5-24.9 g/d; 0. <12.5 g/d. | 8         |
| Inoue-Choi-2013 <sup>101</sup>       | Iowa Women's Health Study                               | US          | 2004-2009 (5.40)                    | 0       | 73-87 (78.90) | White predominant | 86.10                                   | cancer patients    | 2017        | CVD mortality was identified through the State Health Registry of Iowa, supplemented with the National Death Index (National Center for Health Statistics). |                                                                                                                                                                                                                                                                                                                                                                                                                                                                                                                                                                                                                                                                                                                                                                                                                                                                                                                                                                                                                                                                                                              | 8         |

| Author-year             | Cohort                                  | Country | Follow-up duration (mean or median) | Men (%) | Age (mean)    | Ethnicity (%)*    | Proportion of high school graduates (%) | Health status          | Sample size | Outcome attainment                                                                                                                                                                                                                                             | Definition of healthy lifestyle                                                                                                                                                                                                                                                                                                                                                                                                                                                                                                                                                                                                                                                                                                                                                                                                                                                                                                                    | NOS score |
|-------------------------|-----------------------------------------|---------|-------------------------------------|---------|---------------|-------------------|-----------------------------------------|------------------------|-------------|----------------------------------------------------------------------------------------------------------------------------------------------------------------------------------------------------------------------------------------------------------------|----------------------------------------------------------------------------------------------------------------------------------------------------------------------------------------------------------------------------------------------------------------------------------------------------------------------------------------------------------------------------------------------------------------------------------------------------------------------------------------------------------------------------------------------------------------------------------------------------------------------------------------------------------------------------------------------------------------------------------------------------------------------------------------------------------------------------------------------------------------------------------------------------------------------------------------------------|-----------|
| Jin-2017 <sup>103</sup> | InCHIA NTI study                        | Italy   | 1998-2010 (9.10)                    | 45.00   | 65-95 (74.00) | White predominant | <45.92                                  | general population     | 928         | CVD mortality (including heart disease, stroke, and other CVD; ICD-9, 390-398, 402, 410-438, and 440-448) was identified through the Tuscany Region Mortality General Registry and death certificates at the registry office of the municipality of residence. | Diet (red meat and processed meat, FFQ): 1. <500 g/d and <3 g/d; 0.5. <500 g/d and 3-49 g/d; 0. ≥500 g/d or ≥50 g/d.<br>Diet (sodium, FFQ): 1. ≤1500 mg/d; 0.5. 1501-2400 mg/d; 0. >2400 mg/d.<br>Smoking: 2. never smokers; 1. former smokers; 0. current smokers.<br>PA: 2. light exercise ≥4 h/w, moderate exercise ≥1-2 h/w, or intense exercise many times/w; 1. light exercise 2-4 h/w; 0. inactive or with some walking.<br>BMI: 2. <25 kg/m <sup>2</sup> ; 1. 25-29.9 kg/m <sup>2</sup> ; 0. ≥30 kg/m <sup>2</sup> .<br>Diet (MDS, FFQ): 2. 6-9 points; 1. 4-5 points; 0. 0-3 points.<br>SBP/DBP: 2. <120 and 80 mmHg (untreated); 1. 120-139 or 80-89 mmHg (untreated) or <120 and 80 mmHg (treated); 0. ≥140 or 90 mmHg.<br>FPG: 2. <100 mg/dl (untreated); 1. 100-125 mg/dl (untreated) or <100 mg/dl (treated); 0. ≥126 mg/dl.<br>TC: 2. <200 mg/dl (untreated); 1. 200-239 mg/dl (untreated) or <200 mg/dl (treated); 0. ≥ 240 mg/dl. | 9         |
| Khaw-2008 <sup>63</sup> | European Prospective Investigation into | UK      | 1993-2006 (11.00)                   | 45.35   | 45-79 (58.13) | White 99.50       | 53.38                                   | CVD or cancer patients | 2057        | CVD mortality (ICD-9, 400-438; ICD-10, I10-I79) was identified through death certification at the                                                                                                                                                              | Smoking: 1. not current smokers; 0. current smokers.<br>Alcohol drinking: 1. 1-14 units/w (1 unit≈8 g alcohol); 0. none or >14 units/w.<br>PA: 1. LTPA ≥0.5 h/d; 0. LTPA <0.5                                                                                                                                                                                                                                                                                                                                                                                                                                                                                                                                                                                                                                                                                                                                                                      | 9         |

| Author-year                 | Cohort                                                | Country     | Follow-up duration (mean or median) | Men (%) | Age (mean)    | Ethnicity (%) <sup>*</sup> | Proportion of high school graduates (%) | Health status                                                                | Sample size | Outcome attainment                                                                                                       | Definition of healthy lifestyle                                                                                                                                                                                                                                                                                                                                                                                                                                                                                                                                                                                                                                                                                                                               | NOS score |
|-----------------------------|-------------------------------------------------------|-------------|-------------------------------------|---------|---------------|----------------------------|-----------------------------------------|------------------------------------------------------------------------------|-------------|--------------------------------------------------------------------------------------------------------------------------|---------------------------------------------------------------------------------------------------------------------------------------------------------------------------------------------------------------------------------------------------------------------------------------------------------------------------------------------------------------------------------------------------------------------------------------------------------------------------------------------------------------------------------------------------------------------------------------------------------------------------------------------------------------------------------------------------------------------------------------------------------------|-----------|
| Kim-2013 <sup>104</sup>     | Cancer and Nutrition -Norfolk Seoul Male Cohort Study | South Korea | 1993-2011 (18.40)                   | 100     | 40-59 (47.53) | Asian predominant          | >53.73                                  | general population                                                           | 12538       | Office of National Statistics.<br>CVD mortality (ICD-10, I01-I99) was identified through the National Statistics Office. | h/d.<br>Diet (plant food intake, blood vitamin C level): 1. $\geq 50$ mmol/l; 0. <50 mmol/l.<br>Smoking: 1. never smokers; 0. ever smokers.<br>PA: 1. MPA $\geq 150$ min/w, VPA $\geq 75$ min/w, or MVPA $\geq 150$ min/w; 0. MPA <150 min/w, MVPA <150 min/w, and VPA <75 min/w.<br>BMI: 1. 23.1-24.9 kg/m <sup>2</sup> ; 0. $\geq 25$ kg/m <sup>2</sup> .<br>Diet (Korean dietary pattern, FFQ): 1. $\geq 2$ points; 0. <2 points.<br>SBP/DBP: 1. <120 and 80 mmHg (without medication); 0. $\geq 120$ or 80 mmHg, or <120 and 80 mmHg (with medication).<br>FBG: 1. <100 mg/dl (without medication); 0. $\geq 100$ mg/d, or <100 mg/dl (with medication).<br>TC: 1. <200 mg/dl (without medication); 0. $\geq 200$ mg/dl, or <200 mg/dl (with medication). | 9         |
| King-2013 <sup>†, 105</sup> | National Health and Nutrition Examination Surveys III | US          | 1988-2006 (NA)                      | 18.50   | 21-NA (NA)    | White 81.10<br>Black 11.10 | 61.88                                   | people with normal blood pressure, low-density lipoprotein cholesterol or C- | 11481       | CVD mortality was determined by the National Death Index.                                                                | Smoking: 1. not current smokers; 0. current smokers.<br>Alcohol drinking (M/F): 1. 0.1-2/1 drinks/d; 0. none or >2/1 drinks/d.<br>PA: 1. >12 times/m; 0. $\leq 12$ times/m.<br>BMI: 1. 18.5-29.9 kg/m <sup>2</sup> ; 0. <18.5 kg/m <sup>2</sup> or $\geq 30$ kg/m <sup>2</sup> .<br>Diet (fruit and vegetables): 1. $\geq 5$ servings/d; 0. <5 servings/d.                                                                                                                                                                                                                                                                                                                                                                                                    | 7         |

| Author-year                 | Cohort                                         | Country | Follow-up duration (mean or median) | Men (%) | Age (mean)    | Ethnicity (%)*    | Proportion of high school graduates (%) | Health status                             | Sample size | Outcome attainment                                                                                                                  | Definition of healthy lifestyle                                                                                                                                                                                                                                                                                       | NOS score |
|-----------------------------|------------------------------------------------|---------|-------------------------------------|---------|---------------|-------------------|-----------------------------------------|-------------------------------------------|-------------|-------------------------------------------------------------------------------------------------------------------------------------|-----------------------------------------------------------------------------------------------------------------------------------------------------------------------------------------------------------------------------------------------------------------------------------------------------------------------|-----------|
| Knoops-2004 <sup>106</sup>  | Healthy Ageing: a Longitudinal study in Europe | Europe  | 1988-2000 (10.00)                   | 64.43   | 70-90 (74.24) | White predominant | <66.86                                  | reactive protein level general population | 2339        | Identification of CVD mortality (ICD-9, 390-459) and CHD mortality (ICD-9, 410-414) was not reported.                               | Smoking: 1. never smokers or quitting >15 years; 0. quitting ≤15 years or current smokers.<br>Alcohol drinking: 1. >0 g/d; 0. none.<br>PA (Voorrips or Morris questionnaire): 1. the intermediate and the highest tertile; 0. the lowest tertile.<br>Diet (mMDS, dietary history method): 1. ≥4 points; 0. <4 points. | 8         |
| Kvaavik-2010 <sup>108</sup> | Health and Lifestyle Survey                    | UK      | 1985-2005 (20.00)                   | 51.35   | 18-NA (43.70) | White 98.00       | NA                                      | general population                        | 4886        | CVD-cause mortality (ICD-9, 390-434 and 436-448) was ascertained from death certificates.                                           | Smoking: 1. not current smokers; 0. current smokers.<br>Alcohol drinking (M/F): 1. ≤21/14 units/w; 0. >21/14 units/w.<br>PA: 1. ≥120 min/w; 0. <120 min/w.<br>Diet (fruits and vegetables consumption, FFQ): 1. ≥3 times/d; 0. <3 times/d.                                                                            | 8         |
| Lee-2009 <sup>†, 110</sup>  | Aerobics Center Longitudinal Study             | US      | 1971-2003 (14.70)                   | 100     | 30-79 (44.13) | White >95.00      | >70.00                                  | general population                        | 23657       | CVD mortality (ICD-9, 390-449.9; ICD-10, I00-I78) were identified through the National Death Index and official death certificates. | Smoking: 1. never smoking; 0. ever smoking.<br>Fitness (CRF): 1. higher 80%; 0. lower 20%.<br>WC: 1. <94 cm; 0. ≥94 cm.                                                                                                                                                                                               | 7         |
| Li-2018 <sup>1</sup>        | Nurses' Health Study & Health Professio        | US      | 1980-2014 (27.20-33.90)             | 36.00   | 34-75 (48.96) | White 96.34       | Predomina nt                            | general population                        | 123219      | CVD mortality was identified from state vital statistics records, the National Death                                                | Smoking: 1. never smokers; 0. ever smokers.<br>Alcohol drinking (M/F): 1. 5-30/15 g/d; 0. <5 g/d or >30/15 g/d.<br>MVPA: 1. >30 min/d; 0. ≤30 min/d.                                                                                                                                                                  | 8         |

| Author-year             | Cohort                                                      | Country | Follow-up duration (mean or median) | Men (%) | Age (mean)       | Ethnicity (%)*       | Proportion of high school graduates (%) | Health status                              | Sample size | Outcome attainment                                                                                                                                                                                                                | Definition of healthy lifestyle                                                                                                                                                                                                                                                                                                                                                                                                                                                                                                                                                                                                                                                                                                                                                                                                                                                                                                                                                              | NOS score |
|-------------------------|-------------------------------------------------------------|---------|-------------------------------------|---------|------------------|----------------------|-----------------------------------------|--------------------------------------------|-------------|-----------------------------------------------------------------------------------------------------------------------------------------------------------------------------------------------------------------------------------|----------------------------------------------------------------------------------------------------------------------------------------------------------------------------------------------------------------------------------------------------------------------------------------------------------------------------------------------------------------------------------------------------------------------------------------------------------------------------------------------------------------------------------------------------------------------------------------------------------------------------------------------------------------------------------------------------------------------------------------------------------------------------------------------------------------------------------------------------------------------------------------------------------------------------------------------------------------------------------------------|-----------|
| Lin-2012 <sup>112</sup> | nals<br>Follow-Up<br>Study<br>Taichung<br>Diabetes<br>Study | China   | 2002-2008<br>(4.02)                 | 51.93   | 30-NA<br>(58.51) | Asian<br>predominant | NA                                      | type 2<br>diabetes<br>mellitus<br>patients | 5686        | Index, reports by<br>the families, and the<br>postal system.<br>CVD mortality<br>(ICD-9-CM, 390-<br>459) was identified<br>through the Taiwan<br>National Death<br>Index.                                                         | BMI: 1. 18.5-24.9 kg/m <sup>2</sup> ; 0. <18.5<br>kg/m <sup>2</sup> or ≥25 kg/m <sup>2</sup> .<br>Diet (AHEI, FFQ): 1. top 40% of<br>each cohort distribution; 0. lower<br>60% of each cohort distribution.<br>Smoking: 1. never smokers; 0. ever<br>smokers.<br>Alcohol drinking: 1. abstainer; 0.<br>drinker.<br>PA: 1. ≥once /w for >1 m<br>continuously; 0. <once /w or <1 m<br>continuously.<br>Diet (carbohydrate intake, 24-h food<br>diary): 1. <65%E; 0. ≥65%E.<br>Smoking: 1. never smokers; 0. ever<br>smokers.<br>PA: 1. MVPA ≥80 min/w; 0. MVPA<br><80 min/w.<br>BMI: 1. <25 kg/m <sup>2</sup> ; 0. ≥25 kg/m <sup>2</sup> .<br>Diet (salt intake): 1. low salt intake;<br>0. intermediate and high salt intake.<br>SBP/DBP: 1. <120 and 80 mmHg<br>(not treated); 0. <120 and 80 mmHg<br>(treated) or ≥120 or 80 mmHg.<br>FPG: 1. <100 mg/dl (not treated); 0.<br><100 mg/dl (treated) ≥100 mg/d.<br>TC: 1. <200 mg/dl (not treated); 0. or<br><200 mg/dl (treated) ≥200 mg/dl. | 7         |
| Liu-2014 <sup>115</sup> | Kailuan<br>Study                                            | China   | 2006-2010<br>(4.02)                 | 79.75   | 18-98<br>(51.46) | Asian<br>predominant | >6.91                                   | general<br>population                      | 95429       | CVD mortality<br>(ICD-10, I05-I09,<br>I11, I20-I27, and<br>I30-I52) was<br>ascertained by<br>discharge lists from<br>local hospitals and<br>death certificates<br>from state vital<br>statistics offices and<br>active follow-up. | BMI: 1. <25 kg/m <sup>2</sup> ; 0. ≥25 kg/m <sup>2</sup> .<br>Diet (salt intake): 1. low salt intake;<br>0. intermediate and high salt intake.<br>SBP/DBP: 1. <120 and 80 mmHg<br>(not treated); 0. <120 and 80 mmHg<br>(treated) or ≥120 or 80 mmHg.<br>FPG: 1. <100 mg/dl (not treated); 0.<br><100 mg/dl (treated) ≥100 mg/d.<br>TC: 1. <200 mg/dl (not treated); 0. or<br><200 mg/dl (treated) ≥200 mg/dl.                                                                                                                                                                                                                                                                                                                                                                                                                                                                                                                                                                               | 8         |
| Liu-2018 <sup>159</sup> | Nurses'<br>Health<br>Study &<br>Health<br>Professionals     | US      | 1980-2014<br>(13.30)                | 22.18   | 34-75<br>(62.61) | White 95.13          | Predominant                             | diabetes<br>patients                       | 11527       | CVD mortality<br>(ICD-8, 390-458<br>and 795) were<br>identified through<br>the National Death<br>Index or reports by                                                                                                              | 5-point score:<br>Smoking: 1. not current smokers; 0.<br>current smokers.<br>Alcohol drinking (M/F): 1. 5-30/15<br>g/d; 0. <5 g/d or >30/15 g/d.                                                                                                                                                                                                                                                                                                                                                                                                                                                                                                                                                                                                                                                                                                                                                                                                                                             | 9         |

| Author-year                               | Cohort                                                                                                    | Country     | Follow-up duration (mean or median) | Men (%) | Age (mean)    | Ethnicity (%)*    | Proportion of high school graduates (%) | Health status      | Sample size | Outcome attainment                                                                                | Definition of healthy lifestyle                                                                                                                                                                                                                                                                                                                                                                                                                                                                                                                                                                                                                                                                                                                                                                                                                                                                                                                                                                                                                                                                                                                                                                       | NOS score |
|-------------------------------------------|-----------------------------------------------------------------------------------------------------------|-------------|-------------------------------------|---------|---------------|-------------------|-----------------------------------------|--------------------|-------------|---------------------------------------------------------------------------------------------------|-------------------------------------------------------------------------------------------------------------------------------------------------------------------------------------------------------------------------------------------------------------------------------------------------------------------------------------------------------------------------------------------------------------------------------------------------------------------------------------------------------------------------------------------------------------------------------------------------------------------------------------------------------------------------------------------------------------------------------------------------------------------------------------------------------------------------------------------------------------------------------------------------------------------------------------------------------------------------------------------------------------------------------------------------------------------------------------------------------------------------------------------------------------------------------------------------------|-----------|
|                                           | Follow-Up Study                                                                                           |             |                                     |         |               |                   |                                         |                    |             | next of kin or postal authorities.                                                                | MVPA: 1. $\geq 150$ min/w; 0. $< 150$ min/w.<br>BMI: 1. $< 25.0$ kg/m <sup>2</sup> ; 0. $\geq 25.0$ kg/m <sup>2</sup> .<br>Diet (AHEI, FFQ): 1. top 40% of each cohort distribution; 0. lower 60% of each cohort distribution.<br>4-point score: smoking, drinking, MVPA, and diet.<br>Alcohol drinking: 1. didn't drink yesterday; 0. drank yesterday.<br>PA (MPA $\geq 60$ min/d or VPA $\geq 30$ min/d): 1. $\geq 2$ d/w; 0.5. one d/w; 0. $< 1$ d/w.<br>Sedentary behavior: 1. regular exercise or exhausting; 0.5. walking, cycling, other regular activities such as gardening, or average; 0. mostly sitting or sedentary.<br>BMI: 1. 18.5-24.9 kg/m <sup>2</sup> ; 0.5. 25-29.9 kg/m <sup>2</sup> ; 0. $< 18.5$ kg/m <sup>2</sup> or $\geq 30$ kg/m <sup>2</sup> .<br>Diet (energy density, score consisting of fat for cooking, bread, or salad, cut away fat from meat, and sweets/chocolate): 1. 2-3 points; 0.5. one point; 0. zero points.<br>Diet (fruits and vegetables): 1. yesterday consume both fruits and vegetables; 0.5. yesterday consume either fruits or vegetables; 0. yesterday consume no fruits and vegetables.<br>Diet (grains): 1. consume yesterday; 0. no yesterday. |           |
| Lohse-2016 <sup>†</sup><br><sub>116</sub> | MONitoring trends and determinants of CARDIOvascular disease-Switzerland & National Research Program meIA | Switzerland | 1977-NA (21.70)                     | 50.60   | 25-74 (46.06) | White predominant | 58.85                                   | general population | 16722       | CVD mortality (ICD-8, 410-458; ICD-10, I20-I99) was identified through the Swiss National Cohort. |                                                                                                                                                                                                                                                                                                                                                                                                                                                                                                                                                                                                                                                                                                                                                                                                                                                                                                                                                                                                                                                                                                                                                                                                       | 9         |

| Author-year                       | Cohort                                                                                                   | Country     | Follow-up duration (mean or median) | Men (%) | Age (mean)    | Ethnicity (%)*    | Proportion of high school graduates (%) | Health status       | Sample size | Outcome attainment                                                                                | Definition of healthy lifestyle                                                                                                                                                                                                                                                                                                                                                                                                          | NOS score |
|-----------------------------------|----------------------------------------------------------------------------------------------------------|-------------|-------------------------------------|---------|---------------|-------------------|-----------------------------------------|---------------------|-------------|---------------------------------------------------------------------------------------------------|------------------------------------------------------------------------------------------------------------------------------------------------------------------------------------------------------------------------------------------------------------------------------------------------------------------------------------------------------------------------------------------------------------------------------------------|-----------|
| Luoto-1998 <sup>160</sup>         | "The Finnish National Public Health Institute Study"                                                     | Finland     | 1978-1993 (9.00)                    | 46.74   | 15-64 (NA)    | White predominant | NA                                      | general population  | 18974       | CVD mortality was identified through the Central Population Register.                             | Diet (processed meat): 1. didn't consume yesterday; 0.5. consume meat yesterday; 0. consume sausage products yesterday.<br>Diet (salt): 1. never adding salt; 0.5. sometimes adding salt; 0. always adding salt.<br>Smoking: 1. not smoking; 0. smoking.<br>PA: 1. ≥2-3 times/m; 0. <2-3 times/m.<br>Diet: 1. use of butter on bread and whole milk containing <3.9% fat; 0. use of butter on bread and whole milk containing ≥3.9% fat. | 9         |
| Martin-Diener-2014 <sup>117</sup> | MONITORing trends and determinants of Cardiovascular disease-Switzerland & National Research Programme I | Switzerland | 1977-2008 (21.35)                   | 48.60   | 16-90 (45.10) | White predominant | <65.77                                  | general population  | 16721       | CVD mortality (ICD-8, 410-438; ICD-10, I00-I99) was identified through the Swiss National Cohort. | Smoking: 1. not current smokers; 0. current smokers.<br>Alcohol drinking (M/F): 1. <40/20 g/d; 0. >40/20 g/d.<br>PA: 1. frequent walking or cycling, other frequent activities such as gardening, or regular VPA; 0. light PA, mostly sedentary.<br>Diet (fruit intake on the previous day): 1. yes; 0. no.                                                                                                                              | 8         |
| McCullough-2011 <sup>119</sup>    | Cancer Prevention Study-II                                                                               | US          | 1992-2006 (13.07)                   | 45.31   | 50-74 (62.67) | White 97.99       | 92.66                                   | current non-smokers | 111966      | CVD mortality (ICD-9, 390-459; ICD-10, I00-I99) was identified                                    | Alcohol drinking (M/F): 2. 0.1-2/1 drinks/d; 1. none; 0. >2/1 drinks/d.<br>PA: 2. ≥17.5 MET-h/w; 1. 8.75-17.4 MET-h/w; 0. <8.75 MET-h/w.                                                                                                                                                                                                                                                                                                 | 7         |

| Author-year                  | Cohort                                    | Country | Follow-up duration (mean or median) | Men (%) | Age (mean)    | Ethnicity (%) <sup>*</sup> | Proportion of high school graduates (%) | Health status                                    | Sample size | Outcome attainment                                                                                                       | Definition of healthy lifestyle                                                                                                                                                                                                                                                                                                                                                                                         | NOS score |
|------------------------------|-------------------------------------------|---------|-------------------------------------|---------|---------------|----------------------------|-----------------------------------------|--------------------------------------------------|-------------|--------------------------------------------------------------------------------------------------------------------------|-------------------------------------------------------------------------------------------------------------------------------------------------------------------------------------------------------------------------------------------------------------------------------------------------------------------------------------------------------------------------------------------------------------------------|-----------|
|                              | Nutrition Cohort                          |         |                                     |         |               |                            |                                         |                                                  |             | through National Death Index.                                                                                            | BMI: 2. 18.5-24.9 kg/m <sup>2</sup> at both time points; 1. 25-30 kg/m <sup>2</sup> at both time points, or 18.5-24.9 kg/m <sup>2</sup> at one time point and ≥25 kg/m <sup>2</sup> at another time point; 0. >30 kg/m <sup>2</sup> at both time points, or >30 kg/m <sup>2</sup> at one time point and 25-30 kg/m <sup>2</sup> at another time point.<br>Diet (ACS, FFQ): 2. 7-9 points; 1. 3-6 points; 0. 0-2 points. |           |
| Mitchell-2010 <sup>161</sup> | Aerobics Center Longitudinal Study        | US      | 1974-2003 (16.10)                   | 100     | 20-84 (43.80) | White 96.00<br>Black 1.00  | >70.00                                  | healthy middle or upper socioeconomic population | 38110       | CVD mortality (ICD-9, 390-449.9; ICD-10, I00-I78) was identified through the National Death Index and death certificates | Smoking: 1. not current smokers; 0. current smokers.<br>Alcohol drinking: 1. 1-14 drinks/w; 0. none or >14 drinks/w.<br>PA: 1. moderate or high PA; 0. low PA.<br>BMI: 1. 18.5-24.9 kg/m <sup>2</sup> ; 0. ≥25 kg/m <sup>2</sup> .<br>CRF: 1. moderate/high CRF (upper two-thirds); 0. low CRF.                                                                                                                         | 8         |
| Mok-2018 <sup>122</sup>      | Atherosclerosis Risk in Communities Study | US      | 1987-2013 (3.30)                    | 43.80   | 45-64 (54.50) | White 75.60<br>Black 24.40 | 70.50                                   | myocardial infarction patients                   | 1277        | CVD mortality was defined as death attributable to CHD, HF, or stroke.                                                   | Smoking: 2. never smokers and former smokers quitting >1 year; 1. former smokers quitting ≤1 year; 0. current smokers.<br>MVPA: 2. ≥150 min/w; 1. 1-150 min/w; 0. none.<br>BMI: 2. <25 kg/m <sup>2</sup> ; 1. 25-29.9 kg/m <sup>2</sup> ; 0. ≥30 kg/m <sup>2</sup> .<br>Diet (AHA, FFQ): 2. 4-5 components; 1. 2-3 components; 0. 0-1 component.<br>SBP/DBP: 2. <120/80 mmHg (untreated); 1. <120/80 mmHg               | 6         |



| Author-year                 | Cohort                        | Country | Follow-up duration (mean or median) | Men (%) | Age (mean)     | Ethnicity (%)* | Proportion of high school graduates (%) | Health status               | Sample size | Outcome attainment                                                                                                          | Definition of healthy lifestyle                                                                                                                                                                                                                                                                                                                                                                                                                                                                                                                                                                                                                                                                                                                                                                                                                                                                                                                                                                                                                                                                                                                                                  | NOS score |
|-----------------------------|-------------------------------|---------|-------------------------------------|---------|----------------|----------------|-----------------------------------------|-----------------------------|-------------|-----------------------------------------------------------------------------------------------------------------------------|----------------------------------------------------------------------------------------------------------------------------------------------------------------------------------------------------------------------------------------------------------------------------------------------------------------------------------------------------------------------------------------------------------------------------------------------------------------------------------------------------------------------------------------------------------------------------------------------------------------------------------------------------------------------------------------------------------------------------------------------------------------------------------------------------------------------------------------------------------------------------------------------------------------------------------------------------------------------------------------------------------------------------------------------------------------------------------------------------------------------------------------------------------------------------------|-----------|
| Nechuta-2010 <sup>124</sup> | Shanghai Women's Health Study | China   | 1996-2007 (9.10)                    | 0       | 40-70 (<56.95) | Asian 100      | 42.10                                   | non-smokers and non-drinker | 63791       | CVD mortality (ICD-9, 390-459) was identified through Shanghai cancer, vital statistics registries, and death certificates. | (treated) and 120-139/80-89 mmHg; 0. $\geq$ 140/90 mmHg.<br>FBG: 2. <5.6 mmol/l (untreated); 1. <5.6 mmol/l (treated) or 5.6-6.9 mmol/l; 0. $\geq$ 7.0 mmol/l.<br>TC: 2. <5.2 mmol/l (untreated); 1. <5.2 mmol/l (treated) or 5.2-6.1 mmol/l; 0. $\geq$ 6.2 mmol/l.<br>9-point score:<br>Exposed to spouse smoke: 1. never; 0. ever.<br>PA: 2. $\geq$ 2.0 MET h/d; 1. 0.1-1.99 MET h/d; 0. none.<br>BMI: 2. 18.5-24.99 kg/m <sup>2</sup> ; 1. 25.0-29.99 kg/m <sup>2</sup> ; 0. $\geq$ 30.0 kg/m <sup>2</sup> or <18.5 kg/m <sup>2</sup> .<br>WHR: 2. tertile one (<0.786); 1. tertile 2; 0. tertile three ( $\geq$ 0.830).<br>Diet (fruit and vegetable intake, FFQ): 2. tertile three ( $\geq$ 626.5 g/d); 1. tertile 2; 0. tertile one (<404.3 g/d).<br>5-point score:<br>Exposed to spouse smoke: 1. never; 0. ever.<br>PA: 1. $\geq$ 2.0 MET h/d; 0. <2.0 MET h/d.<br>BMI: 1. 18.5-24.99 kg/m <sup>2</sup> ; 0. $\geq$ 25.0 kg/m <sup>2</sup> or <18.5 kg/m <sup>2</sup> .<br>WHR: 1. tertile one (<0.786); 0. tertile two and three ( $\geq$ 0.786).<br>Diet (fruit and vegetable intake, FFQ): 1. tertile three ( $\geq$ 626.5 g/d); 0. tertile two and one (<626.5 g/d). | 8         |

| Author-year                     | Cohort                               | Country   | Follow-up duration (mean or median) | Men (%) | Age (mean)    | Ethnicity (%)*    | Proportion of high school graduates (%) | Health status      | Sample size | Outcome attainment                                                                                                                                     | Definition of healthy lifestyle                                                                                                                                                                                                                                                                                                                                                                                                                                                                                                                                                                                          | NOS score |
|---------------------------------|--------------------------------------|-----------|-------------------------------------|---------|---------------|-------------------|-----------------------------------------|--------------------|-------------|--------------------------------------------------------------------------------------------------------------------------------------------------------|--------------------------------------------------------------------------------------------------------------------------------------------------------------------------------------------------------------------------------------------------------------------------------------------------------------------------------------------------------------------------------------------------------------------------------------------------------------------------------------------------------------------------------------------------------------------------------------------------------------------------|-----------|
| Odegaard-2011 <sup>8, 126</sup> | Singapore Chinese Health Study       | Singapore | 1993-2016 (20.60)                   | 45.10   | 45-74 (55.30) | Asian predominant | <32.70                                  | general population | 44052       | CVD mortality (ICD-9, 390-459; ICD-10, I00-I99) was obtained through linkage with the nationwide Singapore Birth and Death Registry.                   | 6-point score:<br>Smoking: 1. never smokers; 0. ever smokers.<br>Alcohol drinking (M/F): 1. 0.1-14/7 drinks/w; 0. none or >14/7 drinks/w.<br>PA: 1. moderate activity $\geq 2$ h/w, or strenuous activity $\geq 0.5$ h/w; 0. moderate activity <2 h/w, or strenuous activity <0.5 h/w.<br>BMI (aged <65/aged $\geq 65$ ): 1. 18.5-21.4/24.4 kg/m <sup>2</sup> ; 0. <18.5 or $\geq 21.5/24.5$ kg/m <sup>2</sup> .<br>Diet (AHEI-2010, FFQ): 1. highest 40%; 0. Lower 60%.<br>Sleeping: 1. 7-8 h/d; 0. <7 or >8 h/d.<br>5-point score: smoking, drinking, PA, BMI, and diet.<br>4-point score: smoking, PA, BMI, and diet. | 8         |
| Petersen-2015 <sup>129</sup>    | Diet, Cancer and Health cohort study | Denmark   | 1993-2010 (14.00)                   | 47.10   | 50-64 (55.53) | White predominant | 11.00                                   | general population | 51521       | CVD mortality (ICD-10, I10-I25, I27-I52, I60-I64, and I70-I79) was identified through the Central Population Registry and Register of Causes of Death. | 5-point score:<br>Smoking: 1. never smokers or quitting $\geq 15$ years; 0. current smokers or quitting <15 years.<br>Alcohol drinking (M/F): 1. $\leq 14/7$ units/w; 0. >14/7 units/w.<br>PA: 1. $\geq 30$ min/d; 0. <30 min/d.<br>WC: 1. $\leq 102$ cm; 0. >102 cm.<br>Diet (score consisting of fat, red and processed meat, fish, whole grain, and fruits and vegetables consumption, FFQ): 1. 2-5 components; 0. 0-1 component.<br>4-point score: smoking, drinking, PA, and diet.                                                                                                                                  | 8         |

| Author-year                    | Cohort                                                                     | Country     | Follow-up duration (mean or median) | Men (%) | Age (mean)    | Ethnicity (%)*    | Proportion of high school graduates (%) | Health status      | Sample size | Outcome attainment                                                                                                                                                                                                                                                                                                                                                                                                                             | Definition of healthy lifestyle                                                                                                                                                                                                                                                                                                                                                                                                                         | NOS score |
|--------------------------------|----------------------------------------------------------------------------|-------------|-------------------------------------|---------|---------------|-------------------|-----------------------------------------|--------------------|-------------|------------------------------------------------------------------------------------------------------------------------------------------------------------------------------------------------------------------------------------------------------------------------------------------------------------------------------------------------------------------------------------------------------------------------------------------------|---------------------------------------------------------------------------------------------------------------------------------------------------------------------------------------------------------------------------------------------------------------------------------------------------------------------------------------------------------------------------------------------------------------------------------------------------------|-----------|
| Struijk-2014 <sup>†, 162</sup> | European Prospective Investigation into Cancer and Nutrition - Netherlands | Netherlands | 1993-2008 (12.20)                   | 25.90   | 20-70 (48.90) | White predominant | 20.70                                   | general population | 33671       | CVD cases (including CHD, stroke and other cardiovascular events such as PAD and HF; ICD-9, 410-414, 427.5, 428, 415.1, 443.9, 430-438, 440-442, 444, 798.1, 798.2, 798.9; ICD-10, I20-I25, I46, R96, G45, I60-I67, I69, I70-I74, I50) and CHD cases (including IHD, cardiac arrest and sudden death; ICD-9, 410-414, 427.5, 798.1, 798.2, 798.9; ICD-10, I20-I25, I46, R96) were identified through Dutch Centre for Health Care Information. | Alcohol drinking (M/F): 10. ≤20/10 g/d; 0. ≥60/40 g/d.<br>PA: 10. ≥3.5 h/w; 0. zero h/w.<br>Diet (vegetables, FFQ): 10. ≥200 g/d; 0. zero g/d.<br>Diet (fruit, FFQ): 10. ≥200 g/d; 0. zero g/d.<br>Diet (DF, FFQ): 10. ≥14 g/4.2MJ; 0. zero g/4.2MJ.<br>Diet (EPA/DHA, FFQ): 10. ≥450 mg/d; 0. zero mg/d.<br>Diet (SFA, FFQ): 10. <10%E; 0. ≥15%E.<br>Diet (mono trans-FA, FFQ): 10. ≥1%E; 0. <1%E.<br>Diet (sodium, FFQ): 10. <1.68 g/d; 0. ≥2.52 g/d. | 9         |
| Tamosiunas-2014 <sup>137</sup> | MONITORING trends and determinants of Cardiovascular disease-              | Lithuania   | 1983-2011 (13.30)                   | 46.13   | 45-64 (55.18) | White predominant | 63.66                                   | general population | 5635        | CVD mortality (ICD-9, 390-458; ICD-10, I00-I99) and CHD mortality (ICD-9, 410-414; ICD-10, I20-I25) were identified through regional mortality register.                                                                                                                                                                                                                                                                                       | Smoking: 1. never smokers; 0. ever smokers.<br>PA (LTPA): 1. ≥7 h/w; 0. <7 h/w.<br>BMI: 1. <25.0 kg/m <sup>2</sup> ; 0. ≥25.0 kg/m <sup>2</sup> .<br>SBP/DBP: 1. <120 and 80 mmHg (untreated); 0. ≥120 or 80 mmHg, or <120 and 80 mmHg (treated).<br>FBG: 1. <5.55 mmol/L; 0. ≥5.55 mmol/L.                                                                                                                                                             | 8         |

| Author-year                     | Cohort                                                                       | Country | Follow-up duration (mean or median) | Men (%) | Age (mean) | Ethnicity (%) <sup>*</sup> | Proportion of high school graduates (%) | Health status      | Sample size | Outcome attainment                                                                                                                                                                                                                | Definition of healthy lifestyle                                                                                                                                                                                                                                                                                        | NOS score |
|---------------------------------|------------------------------------------------------------------------------|---------|-------------------------------------|---------|------------|----------------------------|-----------------------------------------|--------------------|-------------|-----------------------------------------------------------------------------------------------------------------------------------------------------------------------------------------------------------------------------------|------------------------------------------------------------------------------------------------------------------------------------------------------------------------------------------------------------------------------------------------------------------------------------------------------------------------|-----------|
|                                 | Lithuania & Health, Alcohol and Psychosocial Factors in Eastern Europe Study |         |                                     |         |            |                            |                                         |                    |             |                                                                                                                                                                                                                                   | TC: 1. <5.2 mmol/L; 0. ≥5.2 mmol/L.                                                                                                                                                                                                                                                                                    |           |
| Towfighi-2012 <sup>†, 139</sup> | National Health and Nutrition Examination Surveys III                        | US      | 1988-2000 (NA)                      | 50.00   | NA (67.00) | White 81.10<br>Black 11.10 | 61.88                                   | stroke patients    | 388         | Cardiovascular disease mortality including deaths from any heart disease, cerebrovascular cause, atherosclerosis or hypertension (UCOD-113 codes 054-074), was identified through National Death Index death certificate records. | Smoking: 1. not current smokers; 0. current smokers.<br>Alcohol drinking (M/F): 1. 0.1-2/1 drinks/d; 0. none or >2/1 drinks/d.<br>PA: 1. >12 times/m; 0. ≤12 times/m.<br>BMI: 1. 18.5-29.9 kg/m <sup>2</sup> ; 0. <18.5 or ≥30 kg/m <sup>2</sup> .<br>Diet (fruit and vegetables): 1. ≥5 servings/d; 0. <5 servings/d. | 8         |
| Van Dam-2008 <sup>†, 67</sup>   | Nurses' Health Study                                                         | US      | 1980-2004 (22.62)                   | 0       | 34-59 (NA) | White predominant          | Predominant                             | general population | 77782       | CVD mortality (ICD-8, 390-459 and 795) was identified through reports by next of kin, the postal authorities, death                                                                                                               | Smoking: 1. never smokers; 0. ever smokers.<br>Alcohol drinking: 1. 1-14.9 g/d; 0. <1 g/d or ≥15.0 g/d.<br>PA (MVPA): 1. ≥30 min/d; 0. <30 min/d.<br>BMI: 1. 18.5-25.0 kg/m <sup>2</sup> ; 0. >25.0                                                                                                                    | 6         |

| Author-year                  | Cohort                                                       | Country     | Follow-up duration (mean or median) | Men (%) | Age (mean)    | Ethnicity (%)*    | Proportion of high school graduates (%) | Health status      | Sample size | Outcome attainment                                                                                                                                                                                                                             | Definition of healthy lifestyle                                                                                                                                                                                                                                                                                                                                                                                                                                                                                                                                                                                                | NOS score |
|------------------------------|--------------------------------------------------------------|-------------|-------------------------------------|---------|---------------|-------------------|-----------------------------------------|--------------------|-------------|------------------------------------------------------------------------------------------------------------------------------------------------------------------------------------------------------------------------------------------------|--------------------------------------------------------------------------------------------------------------------------------------------------------------------------------------------------------------------------------------------------------------------------------------------------------------------------------------------------------------------------------------------------------------------------------------------------------------------------------------------------------------------------------------------------------------------------------------------------------------------------------|-----------|
| van Lee-2016 <sup>144</sup>  | Rotterdam Study                                              | Netherlands | 1990-2011 (20.00)                   | 40.47   | 55-NA (65.43) | White predominant | 69.73                                   | general population | 2987        | certificates, medical records, and National Death Index. CVD mortality (ICD-10, I00-I99), CHD mortality (ICD-10, I21, I24, I25, I46, I49, I50) and stroke mortality (ICD-10, I60-I69) were identified through municipal population registries. | kg/m <sup>2</sup> .<br>Diet (AHEI, FFQ): 1. upper two fifths; 0. lower three fifths.<br>Alcohol drinking (M/F): 1. ≤20/10 g/d; 0. >20/10 g/d.<br>PA: 1. ≥150 min/w; 0. <150 min/w.<br>Diet (vegetable consumption, FFQ): 1. 150-200 g/d; 0. <150 g/d or >200 g/d.<br>Diet (fruit consumption, FFQ): 1. ≥200 g/d; 0. <200 g/d.<br>Diet (DF, FFQ): 1. 30-40 g/d; 0. <30 g/d or >40 g/d.<br>Diet (fish consumption, FFQ): 1. ≥2 portions/w and ≥1 oily fish; 0. <2 portions/w or <1 oily fish.<br>Diet (SFA, FFQ): 1. <10%E; 0. ≥10%E.<br>Diet (mono trans-FA, FFQ): 1. <1%E; 0. ≥1%E.<br>Diet (salt, FFQ): 1. ≤6 g/d; 0. >6 g/d. | 9         |
| Vergnaud-2013 <sup>145</sup> | European Prospective Investigation into Cancer and Nutrition | Europe      | 1992-2010 (12.80)                   | 32.05   | 25-70 (51.90) | White predominant | <67.34                                  | general population | 378864      | Circulatory disease (ICD-10, I00-I99) was identified through cancer registries, boards of health, and death indexes, or active follow-up including inquiries to participants, municipal registries, regional                                   | Alcohol drinking (M/F): 1. ≤20/10 g/d; 0.5. 21-30/11-20 g/d; 0. >30/20 g/d.<br>PA: 1. manual/heavy manual job, or >2 h/w of vigorous PA, or >30 min/d of cycling/sports; 0.5. cycling/sports 15-30 min/d; 0. cycling/sports <15 min/d.<br>BMI: 1. 18.5-24.9 kg/m <sup>2</sup> ; 0.5. 25-29.9 kg/m <sup>2</sup> ; 0. <18.5 kg/m <sup>2</sup> or ≥30.0 kg/m <sup>2</sup> .<br>Diet (energy-dense, dietary                                                                                                                                                                                                                        | 7         |

| Author-year                         | Cohort                              | Country | Follow-up duration (mean or median) | Men (%) | Age (mean)    | Ethnicity (%)*             | Proportion of high school graduates (%) | Health status      | Sample size | Outcome attainment                                                                                                                                                                       | Definition of healthy lifestyle                                                                                                                                                                                                                                                                                                                                                                                                                                                                                                                                                                                                                                                                                                                                                                                                                                                                                                                                                            | NOS score |
|-------------------------------------|-------------------------------------|---------|-------------------------------------|---------|---------------|----------------------------|-----------------------------------------|--------------------|-------------|------------------------------------------------------------------------------------------------------------------------------------------------------------------------------------------|--------------------------------------------------------------------------------------------------------------------------------------------------------------------------------------------------------------------------------------------------------------------------------------------------------------------------------------------------------------------------------------------------------------------------------------------------------------------------------------------------------------------------------------------------------------------------------------------------------------------------------------------------------------------------------------------------------------------------------------------------------------------------------------------------------------------------------------------------------------------------------------------------------------------------------------------------------------------------------------------|-----------|
| Warren Andersen-2016 <sup>163</sup> | the Southern Community Cohort Study | US      | 2002-2011 (NA)                      | 85.49   | 40-79 (50.65) | White 31.36<br>Black 68.64 | 73.06                                   | general population | 75689       | health departments, physicians and hospitals.<br>CVD mortality (ICD-10, I00-I69) was identified through the Social Security Administration's Death Master File and National Death Index. | questionnaires): 0.5. ≤125 kcal/100g/d; 0.25. 126-175 kcal/100g/d; 0. >175 kcal/100g/d.<br>Diet (SSB, dietary questionnaires): 0.5. zero g/d; 0.25. ≤250 g/d; 0. >250 g/d.<br>Diet (fruit and vegetable consumption, dietary questionnaires): 0.5. ≥400 g/d; 0.25. 200-399 g/d 0. <200 g/d.<br>Diet (DF, dietary questionnaires): 0.5. ≥25 g/d; 0.25. 12.5-24.9 g/d; 0. <12.5 g/d.<br>Diet (red and processed meat consumption, dietary questionnaires): 1. <500 g/w and <3 g/d; 0.5. <500 g/w and 3-49 g/d; 0. ≥500 g/w or ≥50 g/d.<br>Cumulative breastfeeding: 1. ≥6 m; 0.5. 0.1-5.9 m; 0. zero m.<br>Smoking: 1. never smokers; 0. ever smokers.<br>Alcohol drinking (M/F): 1. ≤2/1 drink/d; 0. >2/1 drink/d.<br>PA: 1. MPA ≥150 min/w, or VPA ≥75 min/w, or MVPA ≥150 min/w; 0. MPA <150 min/w, and VPA <75 min/w, and MVPA <150 min/w.<br>Sedentary behavior: 1. ≤5.75 h/d; 0. >5.75 h/d (lowest quartile).<br>Diet (HEI, FFQ): 1. >66.7 points (highest quartile); 0. ≤66.7 points. | 7         |

| Author-year                 | Cohort                                                | Country | Follow-up duration (mean or median) | Men (%) | Age (mean)     | Ethnicity (%)*             | Proportion of high school graduates (%) | Health status      | Sample size | Outcome attainment                                                                                                    | Definition of healthy lifestyle                                                                                                                                                                                                                                                                                                                                                                                                                                                           | NOS score |
|-----------------------------|-------------------------------------------------------|---------|-------------------------------------|---------|----------------|----------------------------|-----------------------------------------|--------------------|-------------|-----------------------------------------------------------------------------------------------------------------------|-------------------------------------------------------------------------------------------------------------------------------------------------------------------------------------------------------------------------------------------------------------------------------------------------------------------------------------------------------------------------------------------------------------------------------------------------------------------------------------------|-----------|
| Wingard-1982 <sup>147</sup> | Human Population Laboratory                           | US      | 1965-1974 (NA)                      | 47.17   | 30-69 (<53.28) | NA                         | NA                                      | general population | 4725        | IHD and other circulatory disease mortality were identified through California Death Registry.                        | Smoking: 1. never smokers; 0. ever smokers.<br>Alcohol drinking: 1. <45 drinks/m; 0. >45 drinks/m.<br>PA: 1. active; 0. inactive.<br>Quetelet index (weight in pounds/(height in inches) <sup>2</sup> ) based on Metropolitan Life Insurance reports: 1. 9.9% underweight-29.9% overweight; 0. extreme underweight or overweight.<br>Sleeping: 1. 7-8 h/night; 0. <7 h/night or >8 h/night.                                                                                               | 7         |
| Yang-2012 <sup>†, 148</sup> | National Health and Nutrition Examination Surveys III | US      | 1988-2006 (14.50)                   | 48.20   | 20-NA (45.00)  | White 81.10<br>Black 11.10 | 61.88                                   | general population | 13312       | CVD mortality (ICD-10, I00-I78) and IHD mortality (ICD-10, I20-I25) were identified through the National Death Index. | Smoking: 1. not current smokers; 0. current smokers.<br>PA: 1. 3-5.9 METs for ≥5 times/w or ≥6 METs for ≥3 times/w; 0. 3-5.9 METs for <5 times/w and <6 METs for <3 times/w.<br>BMI: 1. <25 kg/m <sup>2</sup> ; 0. ≥25 kg/m <sup>2</sup> .<br>Diet (AHA, FFQ): 1. ≥2 points; 0. <2 points.<br>TC: 1. <200 mg/dl (untreated); 0. <200 mg/dl (treated) or ≥200 mg/dl.<br>SBP/DBP: 1. <120 and 80 mmHg (untreated); 0. <120/80 mmHg (treated) or ≥120/80 mmHg.<br>HbA1c: 1. <5.7%; 0. ≥5.7%. | 8         |
| Zhang-2017 <sup>151</sup>   | Shanghai Men's Health Study                           | China   | 2002-2013 (9.29)                    | 100     | 40-74 (55.34)  | Asian predominant          | 59.90                                   | general population | 59747       | CVD mortality (ICD-9, 390-459) was identified through Shanghai Vital Statistics.                                      | Smoking: 1. never smokers or quitting ≥10 years; 0. current smokers or quitting <10 years.<br>Alcohol drinking: 1. ≤14 drinks/w; 0. >14 drinks/w.<br>PA: 1. MVPA ≥150 min/w (2 MET-                                                                                                                                                                                                                                                                                                       | 8         |

| Author-year              | Cohort                                                                                             | Country | Follow-up duration (mean or median) | Men (%) | Age (mean)    | Ethnicity (%)* | Proportion of high school graduates (%) | Health status      | Sample size | Outcome attainment                                                                                                                            | Definition of healthy lifestyle                                                                                                                                                                                                                                                                                                                                                                                                                                                                                                                                                                                                                                                                                                                                                   | NOS score |
|--------------------------|----------------------------------------------------------------------------------------------------|---------|-------------------------------------|---------|---------------|----------------|-----------------------------------------|--------------------|-------------|-----------------------------------------------------------------------------------------------------------------------------------------------|-----------------------------------------------------------------------------------------------------------------------------------------------------------------------------------------------------------------------------------------------------------------------------------------------------------------------------------------------------------------------------------------------------------------------------------------------------------------------------------------------------------------------------------------------------------------------------------------------------------------------------------------------------------------------------------------------------------------------------------------------------------------------------------|-----------|
| Zhou-2018 <sup>152</sup> | The People's Republic of China-USA Collaborative Study of Cardiovascular and Coronary Epidemiology | China   | 1983-2005 (20.30)                   | 49.57   | 35-59 (45.80) | Asian 100      | NA                                      | general population | 938         | CVD mortality was identified through death certificates or hospital records obtained from next-of-kin or local death registration department. | h/d); 0. MVPA <150 min/w.<br>Diet (Chinese Food Pagoda score consisting of grains, vegetables, fruits, dairy, beans, meat and poultry, fish and shrimp, eggs, fats and oils, and salt, FFQ): 1. top three quintiles; 0. lower two quintiles.<br>Smoking: 1. never smokers; 0. ever smokers.<br>PA: 1. took part in physical exercises regularly; 0. not took part in physical exercises regularly.<br>BMI: 1. <24 kg/m <sup>2</sup> ; 0. ≥24 kg/m <sup>2</sup> .<br>Diet (AHA, 24-h dietary recall): 1. 4-5 components; 0. 0-3 components.<br>SBP/DBP: 1. <120/80 mmHg (untreated); 0. <120/80 mmHg (treated) or ≥120/80 mmHg.<br>FBG: 1. <100 mg/dl (untreated); 0. <100 mg/dl (treated) or ≥100 mg/dl.<br>TC: 1. <200 mg/dl (untreated); 0. <200 mg/dl (treated) or ≥200 mg/dl. | 8         |

\* The percentage of ethnic groups may not sum to 100% since some participants belonged to the other ethnic groups or did not report the information.

† These studies were only used in stratified analyses.

‡ This study also used a 5-point score, which integrated alcohol, fruit, fish, milk, vegetable, and bean intake as a diet item.

§ The author provided updated analyses for all-cause mortality, cardiovascular disease mortality and cancer mortality, so the information and data were based on the updated analyses.

%E, percentage of total energy intake; ACS, American Cancer Society; AHA, American Heart Association; AHEI, Alternative Healthy Eating Index; aMDS, alternative Mediterranean diet score; ASCVD, atherosclerotic cardiovascular disease; BMI, body mass index; CBVD, cerebrovascular disease; CHD, coronary heart disease; CRF, cardiorespiratory fitness; CVD, cardiovascular disease; DASH, Dietary Approaches to Stop Hypertension; DBP, diastolic blood pressure; DF, dietary fiber; DHA, docosahexaenoic acid; EPA, eicosapentaenoic acid; FA, fatty acid; FBG, fasting blood glucose; FFQ, food frequency questionnaire; FPG, fasting plasma glucose; HbA1c, glycosylated hemoglobin; HDL-c, high-density lipoprotein cholesterol; HEI, Healthy Eating Index; HF, heart failure; ICD, International Classification of Diseases; IHD, ischemic heart disease; LTPA, leisure-time physical activity; M/F, for male and female respectively; MDS, Mediterranean diet score; MET, metabolic equivalent of task; MI, myocardial infarction; mMDS, modified Mediterranean diet score; MPA, moderate physical activity; MVPA, moderate to vigorous physical activity; NA, not



available; NOS, Newcastle–Ottawa Scale; PA, physical activity; PAD, peripheral artery disease; PE, pulmonary embolism; SBP, systolic blood pressure; SFA, saturated fatty acid; SSB, sugar-sweetened beverage; TC, total cholesterol; UK, the United Kingdom; US, the United States; VPA, vigorous physical activity; WC, waist circumference; WHR, waist-to-hip ratio.

**Table A5.** Characteristics of studies related to cardiovascular disease incidence

| Author-year                 | Cohort                                                  | Country | Follow-up duration (mean or median) | Men (%) | Age (mean)    | Ethnicity (%)*             | Proportion of high school graduates (%) | Health status                                         | Sample size | Outcome attainment                                                                                                                                                                                                                                                                         | Definition of healthy lifestyle                                                                                                                                                                                                                                                                                                                        | NOS score |
|-----------------------------|---------------------------------------------------------|---------|-------------------------------------|---------|---------------|----------------------------|-----------------------------------------|-------------------------------------------------------|-------------|--------------------------------------------------------------------------------------------------------------------------------------------------------------------------------------------------------------------------------------------------------------------------------------------|--------------------------------------------------------------------------------------------------------------------------------------------------------------------------------------------------------------------------------------------------------------------------------------------------------------------------------------------------------|-----------|
| Booth-2016 <sup>81</sup>    | Reasons for Geographic and Racial Differences in Stroke | US      | 2003-2012 (5.80)                    | 57.56   | 45-79 (66.60) | White 58.23<br>Black 41.77 | 89.14                                   | population with a 10-year predicted risk $\geq 7.5\%$ | 5709        | ASCVD (nonfatal or fatal and ischemic or hemorrhagic) and CHD (nonfatal MI or CHD death) event, were identified through telephone contact with participants or proxies, adjudicated by medical records, death certificates, autopsy reports, online sources, and the National Death Index. | Smoking: 1. not current smokers; 0. current smokers.<br>PA: 1. $\geq 5$ times/w; 0. $< 5$ times/w.<br>WC (M/F): 1. $\leq 102/88$ cm; 0. $> 102/88$ cm.<br>Diet (MDS, FFQ): 1. top 20%; 0. lower 80%.<br>Diet (SFA intake): 1. top 20%; 0. lower 80%.                                                                                                   | 8         |
| Carlsson-2013 <sup>83</sup> | "Stockholm County 1997"                                 | Sweden  | 1997-NA (10.85)                     | 48.18   | 60-60 (60.00) | White predominant          | 37.89                                   | general population                                    | 4232        | Ischemic CVD (ICD-10, I20, I21, I25. I46, I63-I66) including all fatal and non-fatal MI, fatal and non-fatal ischemic stroke, and hospitalizations due to angina pectoris as the primary cause was                                                                                         | Smoking: 1. not current smokers; 0. current smokers.<br>Alcohol drinking: 1. 0.6-30 g/d; 0. $< 0.6$ g/d or $> 30$ g/d.<br>PA: 1. LTPA (MVPA) $\geq$ once /w; 0. LTPA $<$ once /w.<br>Diet (fish intake): 1. weekly; 0. $<$ once /w.<br>Diet (processed meats as a main meal): 1. $<$ once /w; 0. weekly;<br>Diet (fruit intake): 1. daily; 0. $<$ once | 9         |

|                                    |                                                         |       |                   |       |               |                            |       |                                                       |       |                                                                                                                                                                                                                                                                                                                                                                                                 |                                                                                                                                                                                                                                                                                                                                                                                                                                                                                                                     |   |
|------------------------------------|---------------------------------------------------------|-------|-------------------|-------|---------------|----------------------------|-------|-------------------------------------------------------|-------|-------------------------------------------------------------------------------------------------------------------------------------------------------------------------------------------------------------------------------------------------------------------------------------------------------------------------------------------------------------------------------------------------|---------------------------------------------------------------------------------------------------------------------------------------------------------------------------------------------------------------------------------------------------------------------------------------------------------------------------------------------------------------------------------------------------------------------------------------------------------------------------------------------------------------------|---|
| Diaz-2014 <sup>88</sup>            | Reasons for Geographic and Racial Differences in Stroke | US    | 2003-NA (4.50)    | 49.20 | 45-NA (67.60) | White 39.50<br>Black 60.50 | 80.80 | apparent treatment-resistant hypertension on patients | 2043  | identified through the In Hospital Care Register and the Cause of Death Register.<br>CVD events (fatal CVD events including death within 28 days of a definite or probable MI or sudden death or a confirmed stroke, and non-fatal CVD events including non-fatal definite or probable MI or stroke) were identified through interviews of participants, proxy, next-of-kin, or medical record. | /d.<br>Diet (vegetable intake): 1. daily; 0. <once /d.<br>Smoking: 1. not current smokers; 0. current smokers.<br>Alcohol drinking (M/F): 1. 1-14/7 drinks/w; 0. <1 drink/w or >14/7 drinks/w.<br>PA: 1. $\geq 4$ d/w; 0. <4 d/w.<br>WC (M/F): 1. $\leq 102/88$ cm; 0. >102/88 cm.<br>Diet (DASH score, FFQ): 1. highest quartile ( $\geq 27$ points); 0. lower three quartiles (<27 points).<br>Diet (sodium/potassium intake, FFQ): 1. lowest quartile ( $\leq 0.71$ g/d); 0. higher three quartiles (>0.71 g/d). | 7 |
| Díaz Gutiérrez-2017 <sup>164</sup> | <i>Seguimiento Universitario de Navarra Cohort</i>      | Spain | 1999-2017 (10.40) | 38.58 | 19-91 (37.32) | White predominant          | 100   | general population                                    | 19336 | Primary CVD (death from CVD causes, incident nonfatal acute coronary syndromes, or                                                                                                                                                                                                                                                                                                              | Smoking: 1. never smoking; 0. ever smoking.<br>Drinking (M/F): 1. 0.1-10/5 g/d; 0. none or >10/5 g/d.<br>Binge drinking: 1. $\leq 5$ alcoholic drinks anytime; 0. >5 alcoholic                                                                                                                                                                                                                                                                                                                                      | 8 |

|                         |                          |    |                      |       |                   |                            |      |                    |      |                                                                                                                                                                                                                                                                                                                                                                             |                                                                                                                                                                                                                                                                                                                                                                                                                                                                                                                                                                                                                                                                                                                                                                                                                                                                                                            |    |
|-------------------------|--------------------------|----|----------------------|-------|-------------------|----------------------------|------|--------------------|------|-----------------------------------------------------------------------------------------------------------------------------------------------------------------------------------------------------------------------------------------------------------------------------------------------------------------------------------------------------------------------------|------------------------------------------------------------------------------------------------------------------------------------------------------------------------------------------------------------------------------------------------------------------------------------------------------------------------------------------------------------------------------------------------------------------------------------------------------------------------------------------------------------------------------------------------------------------------------------------------------------------------------------------------------------------------------------------------------------------------------------------------------------------------------------------------------------------------------------------------------------------------------------------------------------|----|
| Dong-2012 <sup>90</sup> | Northern Manhattan Study | US | 1993-2011<br>(11.00) | 36.30 | 40-107<br>(69.00) | White 75.00<br>Black 24.99 | 43.2 | general population | 2981 | incidental nonfatal stroke) were identified from questionnaires and confirmed by medical records, The Spanish National Death Index, and the Spanish National Institute of Statistics. Stroke cases were identified through telephone interviews and verified by a positive screen. MI cases were identified through telephone interviews and verified by a positive screen. | drinks sometimes.<br>PA: 1. >20 METs-h/w; 0. ≤20 METs-h/w.<br>Sedentary behavior (television exposure): 1. ≤2 h/d; 0. >2 h/d.<br>Diet (MDS, FFQ): 1. ≥4/8 points; 0. <4/8 points.<br>Sleep (a short afternoon nap): 1. 0.1-0.5 h/d; 0. none or >0.5 h/d.<br>Meeting up with friends: 1. >1 h/d; 0. ≤1 h/d.<br>Working: 1. >40 h/w; 0. ≤40 h/w.<br>Smoking: 1. never smokers or quitting >1 year; 0. quitting ≤1 year or current smokers;<br>PA: 1. MPA ≥150 min/w or VPA ≥75 min/w or MVPA ≥150 min/w; 0. MPA <150 min/w and VPA <75 min/w and MVPA <150 min/w.<br>BMI: 1. <25 kg/m <sup>2</sup> ; 0. ≥25 kg/m <sup>2</sup> .<br>Diet (AHA, FFQ): 1. 4-5 components; 0. 0-3 components.<br>SBP/DBP: 1. <120 and 80 mmHg (not treated); 0. <120 and 80 mmHg (treated) or ≥120 or 80 mmHg.<br>FPG: 1. <100 mg/dl (not treated); 0. <100 mg/dl (treated) ≥100 mg/d.<br>TC: 1. <200 mg/dl (not treated); 0. or | 98 |
|-------------------------|--------------------------|----|----------------------|-------|-------------------|----------------------------|------|--------------------|------|-----------------------------------------------------------------------------------------------------------------------------------------------------------------------------------------------------------------------------------------------------------------------------------------------------------------------------------------------------------------------------|------------------------------------------------------------------------------------------------------------------------------------------------------------------------------------------------------------------------------------------------------------------------------------------------------------------------------------------------------------------------------------------------------------------------------------------------------------------------------------------------------------------------------------------------------------------------------------------------------------------------------------------------------------------------------------------------------------------------------------------------------------------------------------------------------------------------------------------------------------------------------------------------------------|----|

|                             |                              |    |                   |       |               |                            |    |                    |      |                                                                                                                                                                                                                                                                    |                                                                                                                                                                                                                                                                                                     |   |
|-----------------------------|------------------------------|----|-------------------|-------|---------------|----------------------------|----|--------------------|------|--------------------------------------------------------------------------------------------------------------------------------------------------------------------------------------------------------------------------------------------------------------------|-----------------------------------------------------------------------------------------------------------------------------------------------------------------------------------------------------------------------------------------------------------------------------------------------------|---|
| Emberson-2005 <sup>92</sup> | British Regional Heart Study | UK | 1978-2000 (NA)    | 100   | 40-59 (49.20) | White predominant          | NA | general population | 6452 | Major CVD events including death from CHD (ICD-9, 410-414) and stroke (ICD-9, 430-438) along with non-fatal MI or stroke were identified through the National Health Service registers and general practitioner reports.                                           | <200 mg/dl (treated) ≥200 mg/dl.<br>Smoking: 1. never smokers; 0. ever smokers.<br>PA: 1. moderately vigorous or vigorous; 0. moderate, light, occasional or none PA.<br>BMI: 1. ≤25 kg/m <sup>2</sup> ; 0. >25 kg/m <sup>2</sup> .                                                                 | 7 |
| Eriksen-2015 <sup>156</sup> | Southall and Brent Revisited | UK | 1988-2011 (21.00) | 84.56 | 40-69 (52.09) | White 52.00<br>Asian 48.00 | NA | general population | 2096 | CVD included fatal CHD (deaths caused by angina, MI or its sequelae or atherosclerotic heart disease. ICD-9, 410-415; ICD-10, I200-I259), fatal stroke (deaths caused from following ICD-9 codes 430-439 or ICD-10 codes I600-I698), and non-fatal CHD and stroke. | Smoking: 1. not current smokers; 0. current smokers.<br>Alcohol drinking (M/F): 1. 1-21/14 units/w; 0. <1 or >21/14 units/w.<br>PA: 1. MPA ≥5 h/w or VPA ≥2.5 h/w; 0. MPA <5 h/w and VPA <2.5 h/w.<br>Diet (vegetables and fruits, simple dietary questionnaire): 1. ≥5.5 times/w; 0. <5.5 times/w. | 7 |

|                            |                                           |    |                   |       |               |                            |       |                    |       |                                                                                                                                                                                                                                                                                                                                                                                                                                                                                                       |                                                                                                                                                                                                                                                                                                                                                                                                                                                                                                                                                 |   |
|----------------------------|-------------------------------------------|----|-------------------|-------|---------------|----------------------------|-------|--------------------|-------|-------------------------------------------------------------------------------------------------------------------------------------------------------------------------------------------------------------------------------------------------------------------------------------------------------------------------------------------------------------------------------------------------------------------------------------------------------------------------------------------------------|-------------------------------------------------------------------------------------------------------------------------------------------------------------------------------------------------------------------------------------------------------------------------------------------------------------------------------------------------------------------------------------------------------------------------------------------------------------------------------------------------------------------------------------------------|---|
| Folsom-2011 <sup>165</sup> | Atherosclerosis Risk in Communities Study | US | 1987-2007 (18.70) | 43.86 | 45-64 (54.00) | White 75.62<br>Black 24.38 | 80.00 | general population | 12744 | <p>CHD included fatal CHD and nonfatal CHD. Outcomes were identified through health and lifestyle questionnaires, medical record review, attendance at a study clinic visit, and the Office of National Statistics.</p> <p>CVD events comprised HF (ICD-9, 428; ICD-10, I50), definite or probable MI, definite fatal CHD, and definite or probable stroke, and were ascertained by active follow-up, discharge lists from the local hospital, and death certificates from state vital statistics</p> | <p>Smoking: 1. quitting &gt;12 m or never smokers; 0. quitting ≤12 m or current smokers.</p> <p>PA: 1. MPA ≥150 min/w, or VPA ≥75 min/w, or MVPA ≥150 min/w; 0. MPA &lt;150 min/w, and VPA &lt;75 min/w, MVPA &lt;150 min/w.</p> <p>BMI: 1. &lt;25 kg/m<sup>2</sup>; 0. ≥25 kg/m<sup>2</sup>.</p> <p>Diet (AHA, FFQ): 1. ≥81 points; 0. &lt;81 points.</p> <p>TC: 1. &lt;200 mg/dl (untreated); 0. &lt;200 mg/dl (treated) or ≥200 mg/dl.</p> <p>SBP/DBP: 1. &lt;120 and 80 mmHg (untreated); 0. &lt;120/80 mmHg (treated) or ≥120/80 mmHg.</p> | 8 |
|----------------------------|-------------------------------------------|----|-------------------|-------|---------------|----------------------------|-------|--------------------|-------|-------------------------------------------------------------------------------------------------------------------------------------------------------------------------------------------------------------------------------------------------------------------------------------------------------------------------------------------------------------------------------------------------------------------------------------------------------------------------------------------------------|-------------------------------------------------------------------------------------------------------------------------------------------------------------------------------------------------------------------------------------------------------------------------------------------------------------------------------------------------------------------------------------------------------------------------------------------------------------------------------------------------------------------------------------------------|---|

|                             |                                               |    |                      |       |                  |                           |       |                    |        |                                                                                                                                                                                                                                                                                                                     |                                                                                                                                                                                                                                                                                                                                                                                                                                                                                                                                                                                                                                         |   |
|-----------------------------|-----------------------------------------------|----|----------------------|-------|------------------|---------------------------|-------|--------------------|--------|---------------------------------------------------------------------------------------------------------------------------------------------------------------------------------------------------------------------------------------------------------------------------------------------------------------------|-----------------------------------------------------------------------------------------------------------------------------------------------------------------------------------------------------------------------------------------------------------------------------------------------------------------------------------------------------------------------------------------------------------------------------------------------------------------------------------------------------------------------------------------------------------------------------------------------------------------------------------------|---|
| Foraker-2016 <sup>166</sup> | Women's Health Initiative Observational Study | US | 1993-2010<br>(12.90) | 0     | NA<br>(63.50)    | White 86.59<br>Black 8.84 | 94.92 | general population | 115306 | offices.<br>CVD (MI, stroke, coronary bypass surgery, percutaneous transluminal coronary angioplasty, angina, or CVD related death) diagnoses were classified by Women's Health Initiative Observational Study physician adjudicators following review of medical records, death certificates, and autopsy reports. | FSG: 1. <100 mg/dl (untreated); 0. <100 mg/dl (treated) or ≥100 mg/dl.<br>Smoking: 1. Never or quitting >12 months; 0. quitting ≤12 months or current.<br>PA: 1. MPA/MVPA >150 min/w or VPA >75 min/w; 0. MPA/MVPA <150 min/w and VPA <75 min/w.<br>BMI: 1. <25 kg/m <sup>2</sup> ; 0. ≥25 kg/m <sup>2</sup> .<br>Diet (AHA, FFQ): 1. 4-5 components; 0. 0-3 components.<br>SBP/DBP: 1. <120/80 mmHg without medication; 0. ≥120/80 mmHg or treated to <120/80 mmHg.<br>FPG: 1. <100 mg/dl without medication; 0. ≥100 mg/dl or treated to <100 mg/dl.<br>TC: 1. <200 mg/dl without medication; 0. ≥200 mg/dl or treated to <200 mg/dl. | 9 |
| Foster-2018 <sup>96</sup>   | UK Biobank                                    | UK | 2006-2015<br>(4.10)  | 45.41 | 40-69<br>(55.71) | White 94.79               | 46.10 | General population | 328594 | Incident CVD was defined as a hospital admission (via record linkage to Health Episode Statistics and to the Scottish Morbidity                                                                                                                                                                                     | Smoking: 1. not current smokers; 0. current smokers.<br>Alcohol drinking: 1. not consume (almost) daily; 0. consume (almost) daily.<br>PA: 1. MPA ≥150 min/w or VPA ≥75 min/w; 0. MPA <150 min/w and VPA <75 min/w.                                                                                                                                                                                                                                                                                                                                                                                                                     | 8 |

|                             |                             |    |                      |       |                  |                            |       |                    |      |                                                                                                                                                                                             |                                                                                                                                                                                                                                                                                                                                                                                                                                                                                                                                                                                                                                                                                                                                                                                                                                                                                                                                                                                                                                                                                                                                        |   |
|-----------------------------|-----------------------------|----|----------------------|-------|------------------|----------------------------|-------|--------------------|------|---------------------------------------------------------------------------------------------------------------------------------------------------------------------------------------------|----------------------------------------------------------------------------------------------------------------------------------------------------------------------------------------------------------------------------------------------------------------------------------------------------------------------------------------------------------------------------------------------------------------------------------------------------------------------------------------------------------------------------------------------------------------------------------------------------------------------------------------------------------------------------------------------------------------------------------------------------------------------------------------------------------------------------------------------------------------------------------------------------------------------------------------------------------------------------------------------------------------------------------------------------------------------------------------------------------------------------------------|---|
| Greenlee-2017 <sup>98</sup> | Cardiovascular Health Study | US | 1989-2011<br>(15.00) | 38.56 | 65-98<br>(72.00) | White 86.71<br>Black 11.72 | 72.91 | general population | 3491 | Records) or death with ICD-10 code I05–I89.9.<br><br>CVD events were identified through hospital records and interviews with participants/proxies, including MI, congestive HF, and stroke. | Diet (fruits and vegetables, 24-h dietary recall): 1. $\geq 400$ g/d; 0. $< 400$ g/d.<br>Diet (oily fish, 24-h dietary recall): 1. $\geq$ one portion/w; 0. $<$ one portion/w.<br>Diet (red meat, 24-h dietary recall): 1. $\leq 3$ portions/w; 0. $> 3$ portions/w.<br>Diet (processed meat, 24-h dietary recall): 1. $\leq 1$ portions/w; 0. $> 1$ portions/w.<br>Television viewing: 1. $< 4$ h/d; 0. $\geq 4$ h/d.<br>Sleeping: 1. 7-9 h/d; 0. $< 7$ h/d or $> 9$ h/d.<br><br>ACS:<br>Smoking: 2. never smokers or quitting $> 1$ year; 1. quitting $\leq 1$ year; 0. current smokers.<br>Alcohol drinking (M/F): 2. non-drinker; 1. $< 2/1$ unit/d; 0. $> 2/1$ unit/d.<br>PA: 2. LTPA $\geq 8.75$ MET-h/w; 1. LTPA 0.10-8.74 MET-h/w; 0. zero MET-h/w.<br>BMI: 2. $< 25$ kg/m <sup>2</sup> at baseline and age 50; 1. 25-29.9 kg/m <sup>2</sup> at baseline and $< 30$ kg/m <sup>2</sup> at age 50, or 25-29.9 kg/m <sup>2</sup> at age 50 and $< 30$ kg/m <sup>2</sup> at baseline; 0. $\geq 30$ kg/m <sup>2</sup> either baseline, age 50, or both.<br>Diet (ACS, including vegetables and fruits, red and processed meats, and | 8 |
|-----------------------------|-----------------------------|----|----------------------|-------|------------------|----------------------------|-------|--------------------|------|---------------------------------------------------------------------------------------------------------------------------------------------------------------------------------------------|----------------------------------------------------------------------------------------------------------------------------------------------------------------------------------------------------------------------------------------------------------------------------------------------------------------------------------------------------------------------------------------------------------------------------------------------------------------------------------------------------------------------------------------------------------------------------------------------------------------------------------------------------------------------------------------------------------------------------------------------------------------------------------------------------------------------------------------------------------------------------------------------------------------------------------------------------------------------------------------------------------------------------------------------------------------------------------------------------------------------------------------|---|



|                         |                      |       |                  |       |                |           |    |                    |       |                                                         |                                                                                                                                                                                                                                                                                                                                                                                                                                                                                                                                                                                                                                                                                                                                                                                                                                                                                                                                                                                                                                                                                                                                                                                                                       |   |
|-------------------------|----------------------|-------|------------------|-------|----------------|-----------|----|--------------------|-------|---------------------------------------------------------|-----------------------------------------------------------------------------------------------------------------------------------------------------------------------------------------------------------------------------------------------------------------------------------------------------------------------------------------------------------------------------------------------------------------------------------------------------------------------------------------------------------------------------------------------------------------------------------------------------------------------------------------------------------------------------------------------------------------------------------------------------------------------------------------------------------------------------------------------------------------------------------------------------------------------------------------------------------------------------------------------------------------------------------------------------------------------------------------------------------------------------------------------------------------------------------------------------------------------|---|
| Han-2018 <sup>157</sup> | Prediction for ASCVD | China | 1998-2015 (7.24) | 40.22 | 20->65 (51.64) | Asian 100 | NA | general population | 93987 | ASCVD cases were identified through hospital records or | <p>whole grains consumption, FFQ): 2. <math>\geq 6</math> score; 1. 3-5 score; 0. <math>&lt; 3</math> score.</p> <p>AHA:</p> <p>Smoking: 2. never smokers or quitting <math>&gt; 1</math> year; 1. quitting <math>\leq 1</math> year; 0. current smokers.</p> <p>PA: 2. LTPA <math>\geq 8.75</math> MET-h/w; 1. LTPA 0.10-8.74 MET-h/w; 0. zero MET-h/w.</p> <p>BMI: 2. <math>&lt; 25</math> kg/m<sup>2</sup>; 1. 25-29.9 kg/m<sup>2</sup>; 0. <math>\geq 30</math> kg/m<sup>2</sup>.</p> <p>Diet (AHA, FFQ): 2. 4-5 components; 1. 2-3 components; 0. 0-1 components.</p> <p>SBP/DBP: 2. <math>&lt; 120</math> and 80 mmHg (untreated); 1. 120-139 or 80-89 mmHg (untreated) or <math>&lt; 120</math> and 80 mmHg (treated); 0. <math>\geq 140</math> or 90 mmHg.</p> <p>FPG: 2. <math>&lt; 100</math> mg/dl (untreated); 1. 100-125 mg/dl (untreated) or <math>&lt; 100</math> mg/dl (treated); 0. <math>\geq 126</math> mg/dl.</p> <p>TC: 2. <math>&lt; 200</math> mg/dl (untreated); 1. 200-239 mg/dl (untreated) or <math>&lt; 200</math> mg/dl (treated); 0. <math>\geq 240</math> mg/dl.</p> <p>7-point score:<br/>Smoking: 1. never smokers or former smokers quitting <math>&gt; 12</math> m; 0. current</p> | 9 |
|-------------------------|----------------------|-------|------------------|-------|----------------|-----------|----|--------------------|-------|---------------------------------------------------------|-----------------------------------------------------------------------------------------------------------------------------------------------------------------------------------------------------------------------------------------------------------------------------------------------------------------------------------------------------------------------------------------------------------------------------------------------------------------------------------------------------------------------------------------------------------------------------------------------------------------------------------------------------------------------------------------------------------------------------------------------------------------------------------------------------------------------------------------------------------------------------------------------------------------------------------------------------------------------------------------------------------------------------------------------------------------------------------------------------------------------------------------------------------------------------------------------------------------------|---|

Risk in  
China  
project

death certificates.

smokers or former smokers quitting  
≤12 m.  
PA: 1. MPA ≥150 min/w or VPA ≥75  
min/w or MVPA ≥150 min/w; 0.  
MPA <150 min/w and VPA <75  
min/w and MVPA <150 min/w.  
BMI: 1. <25 kg/m<sup>2</sup>; 0. ≥25 kg/m<sup>2</sup>.  
Diet (AHA, FFQ): 1. 4-5  
components; 0-3 components.  
SBP/DBP: 1. <120/80 mmHg  
(untreated); 0. <120/80 mmHg  
(treated) or ≥120/80 mmHg.  
FBG: 1. <100 mg/dl (untreated); 0.  
<100 mg/dl (treated) or ≥100 mg/dl.  
TC: 1. <200 mg/dl (untreated); 0.  
<200 mg/dl (treated) or ≥200 mg/dl.  
4-point score: smoking, PA, BMI,  
and diet.

|                                  |                                                                           |             |                      |       |                  |                      |       |                       |       |                                                                                                                                                                                               |                                                                                                                                                                                                                                                                                                                    |   |
|----------------------------------|---------------------------------------------------------------------------|-------------|----------------------|-------|------------------|----------------------|-------|-----------------------|-------|-----------------------------------------------------------------------------------------------------------------------------------------------------------------------------------------------|--------------------------------------------------------------------------------------------------------------------------------------------------------------------------------------------------------------------------------------------------------------------------------------------------------------------|---|
| Hoevenaar-<br>Blom-2014<br>†,158 | Monitoring<br>Project<br>on Risk<br>Factors<br>for<br>Chronic<br>Diseases | Netherlands | 1994-2008<br>(12.00) | 45.58 | 20-65<br>(42.00) | White<br>predominant | 53.44 | general<br>population | 14639 | CVD cases<br>including fatal<br>CVD (ICD-9, 390-<br>459 and 798),<br>nonfatal MI (410-<br>412 and 414), and<br>stroke (430-434 and<br>436) were identified<br>through the<br>National Medical | 5-point score:<br>Smoking: 1. not current smokers; 0.<br>current smokers.<br>Alcohol drinking: 1. <1 glass/m; 0.<br>≥1 glass/m.<br>PA: 1. ≥3.5 h/w cycling and sports; 0.<br><3.5 h/w cycling and sports.<br>Diet (MDS, FFQ): 1. 5-8; 0. 0-4.<br>Sleep: 1. ≥7 h; 0. <7 h.<br>4-point score: smoking, drinking, PA, | 8 |
|----------------------------------|---------------------------------------------------------------------------|-------------|----------------------|-------|------------------|----------------------|-------|-----------------------|-------|-----------------------------------------------------------------------------------------------------------------------------------------------------------------------------------------------|--------------------------------------------------------------------------------------------------------------------------------------------------------------------------------------------------------------------------------------------------------------------------------------------------------------------|---|

|                              |                                    |             |                      |       |                  |                   |       |                    |       |                                                                                                                                                                                                                                                                                                                                                                          |                                                                                                                                                                                                                                                                                            |   |
|------------------------------|------------------------------------|-------------|----------------------|-------|------------------|-------------------|-------|--------------------|-------|--------------------------------------------------------------------------------------------------------------------------------------------------------------------------------------------------------------------------------------------------------------------------------------------------------------------------------------------------------------------------|--------------------------------------------------------------------------------------------------------------------------------------------------------------------------------------------------------------------------------------------------------------------------------------------|---|
| Hulsegge-2016 <sup>167</sup> | Doetinchem Cohort                  | Netherlands | 1993-2013<br>(12.20) | 46.00 | 26-66<br>(46.00) | White predominant | 36.00 | general population | 5263  | Register with the Dutch Hospital Discharge data. Fatal CVD cases were ascertained through linkage with Statistics Netherlands, and non-fatal CVD cases were obtained through probabilistic linkage with the Dutch Hospital Discharge Registry. ICD-9 codes were 410-414, 415.1, 427.5, 428, 430-438, 440-442, 443.9, 444, 798.1, 798.2, 798.9, and corresponding ICD-10. | and diet. Smoking: 1. not current smokers; 0. current smokers. Alcohol drinking (M/F): 1. one drink/m-2/1 drinks/d (1 drink=10 g); 0. <1 drink/m or >2/1 drinks/d. PA: 1. ≥3.5 h/w; 0. <3.5 h/w. BMI: 1. <30 kg/m <sup>2</sup> . 0. ≥30 kg/m <sup>2</sup> . Diet (MDS, FFQ): 1. ≥5; 0. <5. | 9 |
| Lachman-2016 <sup>65</sup>   | European Prospective Investigation | UK          | 1993-2008<br>(10.00) | 44.10 | 39-79<br>(57.00) | White 99.50       | 53.38 | general population | 10043 | CVD cases including CHD (ICD-10, I20-I25) and stroke were identified through                                                                                                                                                                                                                                                                                             | Smoking: 2. never smokers; 1. ever smokers; 0. current smokers; PA: 2. sedentary job with >1.0 h/d recreational activity or standing job with 0.5 h/d recreational activity or                                                                                                             | 7 |

tion into  
Cancer  
and  
Nutrition  
-Norfolk

the East Norfolk  
Health Authority  
database and death  
certificates (ICD-  
10, CHD, I20-I25;  
stroke, I60-I63).

physical job with at least some  
recreational activity or heavy manual  
job; 1. sedentary job with 0.1-1.0 h/d  
recreational activity or standing job  
with ≤0.5 h/d recreational activity or  
physical job with no recreational  
activity; 0. sedentary job and no  
recreational activity.

BMI: 2. <25 kg/m<sup>2</sup>; 1. 25-29.99  
kg/m<sup>2</sup>; 0. ≥30 kg/m<sup>2</sup>.

Diet (AHA, FFQ): 2. 4-5  
components; 1. 2-3 components; 0.  
0-1 components.

SBP/DBP: 2. <120 and 80 mmHg  
(not treated); 1. 120-139 or 80-89  
mmHg, or <120 and 80 mmHg  
(treated) 0. ≥140 or 90 mmHg.

HbA1c: 2. <5.7%; 1. 5.7-6.5%; 0.  
≥6.5%.

TC: 2. <5.2 mmol/l; 1. 5.2-6.2  
mmol/l; 0. ≥6.2 mmol/l.

Smoking: 4. not current smokers; 0.  
current smokers.

Alcohol drinking: 2. ≤109 g  
spirits/w; 0. >109 g spirits/w.

PA: 2. high level; 0. low-to-  
moderate level.

Diet (a weighted score consisting of

|                                 |                 |        |                       |     |                |                      |       |                       |     |                                                                                                                                        |                                                                                                                                                                                                                       |   |
|---------------------------------|-----------------|--------|-----------------------|-----|----------------|----------------------|-------|-----------------------|-----|----------------------------------------------------------------------------------------------------------------------------------------|-----------------------------------------------------------------------------------------------------------------------------------------------------------------------------------------------------------------------|---|
| Lingfors-<br>2019 <sup>14</sup> | "Habo<br>study" | Sweden | 1985-2013<br>(>22.23) | 100 | 33-42<br>(<42) | White<br>predominant | 20.00 | General<br>population | 635 | ICD-9 diagnoses<br>until 1997 were<br>410, 411 and 431-6,<br>and the ICD-10<br>diagnoses from<br>1997 were G45,<br>I21-22, I61, I63-66 | Smoking: 4. not current smokers; 0.<br>current smokers.<br>Alcohol drinking: 2. ≤109 g<br>spirits/w; 0. >109 g spirits/w.<br>PA: 2. high level; 0. low-to-<br>moderate level.<br>Diet (a weighted score consisting of | 8 |
|---------------------------------|-----------------|--------|-----------------------|-----|----------------|----------------------|-------|-----------------------|-----|----------------------------------------------------------------------------------------------------------------------------------------|-----------------------------------------------------------------------------------------------------------------------------------------------------------------------------------------------------------------------|---|

|                         |                                                             |    |                      |       |                  |             |             |                   |       |                                                                                                                                                                                                                                                                                                                                                                                                                                                                  |                                                                                                                                                                                                                                                                                                                                                                                                                                                                                                                                                                    |   |
|-------------------------|-------------------------------------------------------------|----|----------------------|-------|------------------|-------------|-------------|-------------------|-------|------------------------------------------------------------------------------------------------------------------------------------------------------------------------------------------------------------------------------------------------------------------------------------------------------------------------------------------------------------------------------------------------------------------------------------------------------------------|--------------------------------------------------------------------------------------------------------------------------------------------------------------------------------------------------------------------------------------------------------------------------------------------------------------------------------------------------------------------------------------------------------------------------------------------------------------------------------------------------------------------------------------------------------------------|---|
| Liu-2018 <sup>159</sup> | Nurses' Health Study & Health Professionals Follow-Up Study | US | 1980-2014<br>(13.30) | 22.18 | 34-75<br>(62.61) | White 95.13 | Predominant | diabetes patients | 11527 | and FN (surgical operations of coronary arteries). Data from the register of patients treated in hospital and the causes of mortality were also available.<br><br>Incident CVD was defined as fatal and nonfatal CHD and stroke. Medical records were reviewed when the participants reported cardiovascular events on questionnaires. CHD cases including coronary artery bypass graft surgery and nonfatal MI (ascertained according to the WHO criteria) were | consumption of vegetables, fine white bread, coarse fiber-rich bread, and visible fat, 4-item questionnaire): 3. 5–7 points; 0. 0–4 points.<br><br>5-point score:<br>Smoking: 1. not current smokers; 0. current smokers.<br>Alcohol drinking (M/F): 1. 5-30/15 g/d; 0. <5 g/d or >30/15 g/d.<br>MVPA: 1. ≥150 min/w; 0. <150 min/w.<br>BMI: 1. <25.0 kg/m <sup>2</sup> ; 0. ≥25.0 kg/m <sup>2</sup> .<br>Diet (AHEI, FFQ): 1. top 40% of each cohort distribution; 0. lower 60% of each cohort distribution.<br>4-point score: smoking, drinking, MVPA, and diet. | 9 |
|-------------------------|-------------------------------------------------------------|----|----------------------|-------|------------------|-------------|-------------|-------------------|-------|------------------------------------------------------------------------------------------------------------------------------------------------------------------------------------------------------------------------------------------------------------------------------------------------------------------------------------------------------------------------------------------------------------------------------------------------------------------|--------------------------------------------------------------------------------------------------------------------------------------------------------------------------------------------------------------------------------------------------------------------------------------------------------------------------------------------------------------------------------------------------------------------------------------------------------------------------------------------------------------------------------------------------------------------|---|

|                          |                           |       |                  |       |               |                   |       |                                   |       |                                                                                                                                                                                                                                                                                                                                                                  |                                                                                                                                                                                                                                                                                                                                                           |   |
|--------------------------|---------------------------|-------|------------------|-------|---------------|-------------------|-------|-----------------------------------|-------|------------------------------------------------------------------------------------------------------------------------------------------------------------------------------------------------------------------------------------------------------------------------------------------------------------------------------------------------------------------|-----------------------------------------------------------------------------------------------------------------------------------------------------------------------------------------------------------------------------------------------------------------------------------------------------------------------------------------------------------|---|
| Long-2014 <sup>168</sup> | ADDITI ON-Cambridge study | UK    | 2002-2009 (5.00) | 61.00 | 40-69 (61.10) | White 97.00       | NA    | type 2 diabetes mellitus patients | 600   | identified through medical records. Nonfatal stroke cases defined based on the National Survey of Stroke criteria were identified through medical records. Cardiovascular events including CVD mortality, nonfatal MI, nonfatal stroke, and revascularization, were identified through the Office of National Statistics, hospital records, and coroner offices. | Alcohol drinking: 1. decreasing/stopping alcohol consumption; 0. continuing/increasing alcohol consumption. PA: 1. increasing PA; 0. maintaining or decreasing PA. Diet (daily fiber and vitamin C intake, FFQ): 1. increasing; 0. decreasing or maintaining. Diet (daily energy and total fat intake, FFQ): 1. decreasing; 0. increasing or maintaining. | 9 |
| Miao-2015 <sup>71</sup>  | Kailuan study             | China | 2006-2013 (6.81) | 79.50 | NA (51.60)    | Asian predominant | >6.90 | general population                | 91598 | CVD events including MI and stroke were identified through discharge summaries, medical                                                                                                                                                                                                                                                                          | Smoking: 2. never smokers; 1. former smokers; 0. current smokers. PA: 2. ≥80 min/w; 1. 0-80 min/w; 2. never exercise. BMI: 2. <25 kg/m <sup>2</sup> ; 1. 25-29.9 kg/m <sup>2</sup> ; 0. ≥30 kg/m <sup>2</sup> .                                                                                                                                           | 9 |

|                                   |                           |    |                     |       |                        |                      |       |                       |      |                                                                                                                                                                                                                                                                                                                         |                                                                                                                                                                                                                                                                                                                                                                                                                                                                                                                                                                                                                                                                                                                                                                                                                                                                                                                                                                                       |   |
|-----------------------------------|---------------------------|----|---------------------|-------|------------------------|----------------------|-------|-----------------------|------|-------------------------------------------------------------------------------------------------------------------------------------------------------------------------------------------------------------------------------------------------------------------------------------------------------------------------|---------------------------------------------------------------------------------------------------------------------------------------------------------------------------------------------------------------------------------------------------------------------------------------------------------------------------------------------------------------------------------------------------------------------------------------------------------------------------------------------------------------------------------------------------------------------------------------------------------------------------------------------------------------------------------------------------------------------------------------------------------------------------------------------------------------------------------------------------------------------------------------------------------------------------------------------------------------------------------------|---|
| Ommerborn-<br>2016 <sup>169</sup> | Jackson<br>Heart<br>Study | US | 2000-2011<br>(8.30) | 35.58 | <43->7<br>2<br>(54.29) | Black<br>predominant | 83.94 | general<br>population | 3132 | records, and death<br>certificates.<br><br>CVD cases<br>including MI,<br>stroke, cardiac<br>procedures and<br>CVD mortality<br>were identified<br>through active<br>surveillance,<br>medical record<br>abstraction unit, and<br>interviews with the<br>next of kin,<br>physicians, medical<br>examiners or<br>coroners. | Diet: 2. light salt intake; 1. moderate<br>salt intake; 0. heavy salt intake.<br>SBP/DBP: 2. <120 and 80 mmHg<br>(untreated); 1. 120-139 or 80-89<br>mmHg (untreated) or <120 and 80<br>mmHg (treated); 0. ≥140 or 90<br>mmHg.<br>FBG: 2. <100 mg/dl (untreated); 1.<br>100-125 mg/dl (untreated) or <100<br>mg/dl (treated); 0. ≥126 mg/dl.<br>TC: 2. <200 mg/dl (untreated); 1.<br>200-239 mg/dl (untreated) or <200<br>mg/dl (treated); 0. ≥ 240 mg/dl.<br>Smoking: 1. never smokers or<br>quitting ≥12 m; 0. current smokers or<br>quitting <12 m.<br>PA: 1. MPA ≥150 min/w, or VPA ≥75<br>min/w, or MVPA ≥150 min/w; 0.<br>MPA <150 min/w, and VPA <75<br>min/w, and MVPA <150 min/w.<br>BMI: 1. <25 kg/m <sup>2</sup> ; 0. ≥25 kg/m <sup>2</sup> .<br>Diet (AHA, FFQ): 1. 4-5 healthy<br>components; 0. 0-3 healthy<br>components.<br>SBP/DBP: 1. <120 and 80 mmHg<br>(untreated); 0. ≥120 or 80 mmHg, or<br><120 and 80 mmHg (treated).<br>FPG: 1. <100 mg/dl; 0. ≥ 100 mg/dL, | 8 |
|-----------------------------------|---------------------------|----|---------------------|-------|------------------------|----------------------|-------|-----------------------|------|-------------------------------------------------------------------------------------------------------------------------------------------------------------------------------------------------------------------------------------------------------------------------------------------------------------------------|---------------------------------------------------------------------------------------------------------------------------------------------------------------------------------------------------------------------------------------------------------------------------------------------------------------------------------------------------------------------------------------------------------------------------------------------------------------------------------------------------------------------------------------------------------------------------------------------------------------------------------------------------------------------------------------------------------------------------------------------------------------------------------------------------------------------------------------------------------------------------------------------------------------------------------------------------------------------------------------|---|

|                                |                                               |    |                   |       |               |                            |        |                                                      |      |                                                                                                                                                                                                                                                                                      |                                                                                                                                                                                                                                                                                                                                                                                                                                                                                                              |   |
|--------------------------------|-----------------------------------------------|----|-------------------|-------|---------------|----------------------------|--------|------------------------------------------------------|------|--------------------------------------------------------------------------------------------------------------------------------------------------------------------------------------------------------------------------------------------------------------------------------------|--------------------------------------------------------------------------------------------------------------------------------------------------------------------------------------------------------------------------------------------------------------------------------------------------------------------------------------------------------------------------------------------------------------------------------------------------------------------------------------------------------------|---|
| Paynter-2014 <sup>†, 170</sup> | Women's Health Initiative Observational Study | US | 1993-2008 (10.00) | 0     | 50-79 (69.00) | White 83.47<br>Black 8.53  | >79.57 | postmenopausal nonsmoking women                      | 3279 | MCE including MI (confirmation used medical records, ECG readings, and cardiac enzyme and troponin levels), stroke, and death resulting from cardiovascular causes, were identified through self-reported data and adjudicated through medical record and death certificates review. | or <100 mg/dl (treated).<br>TC: 1. <200 mg/dl; 0. ≥200 mg/dl or <200 mg/dl (treated).<br>Smoking: 1. not current smokers; 0. current smokers.<br>Alcohol drinking: 1.0.1-1 drink/d; 0. none or >1 drinks/d.<br>PA: 1. MPA ≥2.5 h/w or VPA ≥75 min/w; 0. MPA <2.5 h/w and VPA <75 min/w.<br>BMI/WC: 1. 18.5-24.9 kg/m <sup>2</sup> or bottom two quintiles; 0. <18.5 kg/m <sup>2</sup> or ≥25.0 kg/m <sup>2</sup> and top three quintiles.<br>Diet (AHEI, FFQ): 1. top two quintiles; 0. low three quintiles. | 9 |
| Ricardo-2015 <sup>132</sup>    | Chronic Renal Insufficiency Cohort            | US | 2003-2011 (4.00)  | 52.00 | 21-74 (58.00) | White 47.17<br>Black 43.95 | 84.50  | population with eGFR 20-70 ml/min/1.73m <sup>2</sup> | 3006 | Atherosclerotic cardiovascular events including MI, stroke, or PAD, were identified through hospital records.                                                                                                                                                                        | Smoking: 1. not current smokers; 0. current smokers.<br>PA: 1. MPA ≥150 min/w, or VPA ≥75 min/w, or MVPA ≥150 min/w; 0. MPA <150 min/w, or VPA <75 min/w, or MVPA <150 min/w.<br>BMI: 1. 20.0-24.9 kg/m <sup>2</sup> ; 0. <20.0 kg/m <sup>2</sup> or ≥25 kg/m <sup>2</sup> .<br>Diet (AHA, FFQ): 1. 4-5 points; 0. 0-                                                                                                                                                                                        | 6 |



|                             |                                                                            |             |                   |       |               |                   |          |                    |       |                                                                                                                                                                                                                                                                                                                                                                                                                  |                                                                                                                                                                                                                                                                                                                                                                                                                                                                                                                                                   |   |
|-----------------------------|----------------------------------------------------------------------------|-------------|-------------------|-------|---------------|-------------------|----------|--------------------|-------|------------------------------------------------------------------------------------------------------------------------------------------------------------------------------------------------------------------------------------------------------------------------------------------------------------------------------------------------------------------------------------------------------------------|---------------------------------------------------------------------------------------------------------------------------------------------------------------------------------------------------------------------------------------------------------------------------------------------------------------------------------------------------------------------------------------------------------------------------------------------------------------------------------------------------------------------------------------------------|---|
| Struijk-2014 <sup>162</sup> | European Prospective Investigation into Cancer and Nutrition - Netherlands | Netherlands | 1993-2008 (12.20) | 25.90 | 20-70 (48.90) | White predominant | 20.70    | general population | 33671 | CVD cases including CHD (including IHD, cardiac arrest and sudden death, ICD-9, 410-414, 427.5, 798.1, 798.2, 798.9; ICD-10, I20-I25, I46, R96), stroke (ICD-9, 430-434, 436; ICD-10, I60-I66) and other cardiovascular events such as PAD and HF (ICD-9, 428, 415.1, 443.9, 435, 437, 438, 440-442, 444; ICD-10, G45, I67, I69, I70-I74, I50) were identified through Dutch Centre for Health Care Information. | 3 points.<br>Alcohol drinking (M/F): 10. $\leq 20/10$ g/d; 0. $\geq 60/40$ g/d.<br>PA: 10. $\geq 3.5$ h/w; 0. zero h/w.<br>Diet (vegetables, FFQ): 10. $\geq 200$ g/d; 0. zero g/d.<br>Diet (fruit, FFQ): 10. $\geq 200$ g/d; 0. zero g/d.<br>Diet (DF, FFQ): 10. $\geq 14$ g/4.2MJ; 0. zero g/4.2MJ.<br>Diet (EPA/DHA, FFQ): 10. $\geq 450$ mg/d; 0. zero mg/d.<br>Diet (SFA, FFQ): 10. $< 10\%E$ ; 0. $\geq 15\%E$ .<br>Diet (mono trans-FA, FFQ): 10. $\geq 1\%E$ ; 0. $< 1\%E$ .<br>Diet (sodium, FFQ): 10. $< 1.68$ g/d; 0. $\geq 2.52$ g/d. | 9 |
| Wu-2012 <sup>†, 171</sup>   | Kailuan Study                                                              | China       | 2006-2010 (NA)    | 79.42 | 18-98 (51.52) | Asian predominant | $> 6.99$ | general population | 91698 | CVD events including fatal nonfatal MI                                                                                                                                                                                                                                                                                                                                                                           | Smoking: 1. never smokers; 0. ever smokers.<br>PA: 1. $\geq 80$ min/w; 0. $< 80$ min/w.                                                                                                                                                                                                                                                                                                                                                                                                                                                           | 7 |

|                          |                                                           |       |                   |       |               |           |    |                    |                                                                                                                                                                                                                                                                                                                         |                                                                                                                                                                                                                                                                                                                                                                       |                                                                                                                                                                                                                                                                                                                        |   |
|--------------------------|-----------------------------------------------------------|-------|-------------------|-------|---------------|-----------|----|--------------------|-------------------------------------------------------------------------------------------------------------------------------------------------------------------------------------------------------------------------------------------------------------------------------------------------------------------------|-----------------------------------------------------------------------------------------------------------------------------------------------------------------------------------------------------------------------------------------------------------------------------------------------------------------------------------------------------------------------|------------------------------------------------------------------------------------------------------------------------------------------------------------------------------------------------------------------------------------------------------------------------------------------------------------------------|---|
|                          |                                                           |       |                   |       |               |           |    |                    | (diagnosed as per chest pain symptoms, ECG changes, and cardiac enzyme levels), cerebral infarction, and cerebral hemorrhage (diagnosed as per signs and symptoms and photocopied neuroimages) were identified through discharge lists from local hospitals and death certificates from state vital statistics offices. | BMI: 1. <25 kg/m <sup>2</sup> ; 0. ≥25 kg/m <sup>2</sup> .<br>Diet (salt): 1. low salt; 0. general or high salt.<br>SBP/DBP: 1. <120 and 80 mmHg (not treated); 0. ≥120 or 80 mmHg, or <120 and 80 mmHg (treated).<br>FBG: 1. <100 mg/dl (not treated); 0. ≥100 mg/dl or <100 mg/dl (treated).<br>TC: 1. <200 mg/dl (treated); 0. ≥200 mg/dl or <200 mg/dl (treated). |                                                                                                                                                                                                                                                                                                                        |   |
| Zhou-2018 <sup>152</sup> | The People's Republic of China-USA Collaborative Study of | China | 1983-2005 (20.30) | 49.57 | 35-59 (45.80) | Asian 100 | NA | general population | 938                                                                                                                                                                                                                                                                                                                     | CVD cases were defined as MI, CHD, sudden cardiac death, fatal or nonfatal stroke, and were identified through death certificates or hospital records                                                                                                                                                                                                                 | Smoking: 1. never smokers; 0. ever smokers.<br>PA: 1. took part in physical exercises regularly; 0. not took part in physical exercises regularly.<br>BMI: 1. <24 kg/m <sup>2</sup> ; 0. ≥24 kg/m <sup>2</sup> .<br>Diet (AHA, 24-h dietary recall): 1. 4-5 components; 0. 0-3 components.<br>SBP/DBP: 1. <120/80 mmHg | 8 |

Cardiovascular  
and  
Cardiovascular  
Epidemiology

obtained from next-of-kin or local death registration department. (untreated); 0. <120/80 mmHg (treated) or  $\geq$ 120/80 mmHg. FBG: 1. <100 mg/dl (untreated); 0. <100 mg/dl (treated) or  $\geq$ 100 mg/dl. TC: 1. <200 mg/dl (untreated); 0. <200 mg/dl (treated) or  $\geq$ 200 mg/dl.

---

\* The percentage of ethnic groups may not sum to 100% since some participants belonged to the other ethnic groups or did not report the information.

† These studies were only used in stratified analyses.

%E, percentage of total energy intake; ACS, American Cancer Society; AHA, American Heart Association; AHEI, Alternative Healthy Eating Index; ASCVD, atherosclerotic cardiovascular disease; BMI, body mass index; CHD, coronary heart disease; CVD, cardiovascular disease; DASH, Dietary Approaches to Stop Hypertension; DBP, diastolic blood pressure; DHA, docosahexaenoic acid; ECG, electrocardiogram; eGFR, estimated glomerular filtration rate; EPA, eicosapentaenoic acid; FA, fatty acid; FBG, fasting blood glucose; FFQ, food frequency questionnaire; FPG, fasting plasma glucose; FSG, fasting serum glucose; HbA1c, glycosylated hemoglobin; HF, heart failure; ICD, International Classification of Diseases; IHD, ischemic heart disease; LDL-c, low-density lipoprotein cholesterol; LTPA, leisure-time physical activity; M/F, for male and female respectively; MCE, major cardiovascular events; MDS, Mediterranean diet score; MET, metabolic equivalent of task; MI, myocardial infarction; MPA, moderate physical activity; MVPA, moderate to vigorous physical activity; NA, not available; NOS, Newcastle–Ottawa Scale; PA, physical activity; PAD, peripheral artery disease; SBP, systolic blood pressure; SFA, saturated fatty acid; SSB, sugar-sweetened beverage; TC, total cholesterol; UK, the United Kingdom; US, the United States; VPA, vigorous physical activity; WC, waist circumference; WHO, World Health Organization.

**Table A6.** Characteristics of studies related to coronary heart disease mortality and stroke mortality

| Author-year                 | Cohort                           | Country | Follow-up duration (mean or median) | Men (%) | Age (mean)    | Ethnicity (%)*    | Proportion of high school graduates (%) | Health status      | Sample size | Outcome attainment                                                                                                                                                                                                                 | Definition of healthy lifestyle                                                                                                                                                                                                                                                                                                                                  | NOS score |
|-----------------------------|----------------------------------|---------|-------------------------------------|---------|---------------|-------------------|-----------------------------------------|--------------------|-------------|------------------------------------------------------------------------------------------------------------------------------------------------------------------------------------------------------------------------------------|------------------------------------------------------------------------------------------------------------------------------------------------------------------------------------------------------------------------------------------------------------------------------------------------------------------------------------------------------------------|-----------|
| CHD Mortality               |                                  |         |                                     |         |               |                   |                                         |                    |             |                                                                                                                                                                                                                                    |                                                                                                                                                                                                                                                                                                                                                                  |           |
| Britton-2008 <sup>172</sup> | Whitehall II                     | UK      | 1985-2004 (17.00)                   | 66.74   | 35-55 (44.37) | White predominant | NA                                      | general population | 9655        | CHD incidence was based on clinically verified events and included fatal CHD (ICD-9, 410-414; ICD-10, I20-I25) or incident non-fatal MI (defined following MONItoring trends and determinants of CARdiovascular disease criteria). | Smoking: 1. not current smokers; 0. current smokers.<br>PA: 1. MPA or VPA $\geq 3$ h/w; 0. MPA or VPA $< 3$ h/w.<br>Diet (questionnaire): 1. eat fruit or vegetables daily; 0. not eat fruit or vegetables daily.                                                                                                                                                | 7         |
| Eguchi-2017 <sup>51</sup>   | Japan Collaborative Cohort Study | Japan   | 1988-2009 (19.30)                   | 43.24   | 40-79 (55.52) | Asian predominant | 63.88                                   | general population | 42647       | The cause and date of death were determined by reviewing death certificates. ICD-10 for CHD was I20-I25.                                                                                                                           | Smoking: 1. not current smokers; 0. current smokers.<br>Alcohol drinking: 1. $< 2$ gou/d (46g ethanol/d); 0. $\geq 2$ gou/d.<br>PA: 1. $\geq 0.5$ h/d or $\geq 5$ h/w; 0. $< 0.5$ h/d and $< 5$ h/w.<br>BMI: 1. 21-25 kg/m <sup>2</sup> ; 0. $< 21$ kg/m <sup>2</sup> or $> 25$ kg/m <sup>2</sup> .<br>Diet (fruit): 1. $\geq 1$ servings/d; 0. $< 1$ serving/d. | 8         |

| Author-year                | Cohort                                         | Country | Follow-up duration (mean or median) | Men (%) | Age (mean)    | Ethnicity (%)*             | Proportion of high school graduates (%) | Health status      | Sample size | Outcome attainment                                                                                            | Definition of healthy lifestyle                                                                                                                                                                                                                                                                                                                                                                                                                                             | NOS score |
|----------------------------|------------------------------------------------|---------|-------------------------------------|---------|---------------|----------------------------|-----------------------------------------|--------------------|-------------|---------------------------------------------------------------------------------------------------------------|-----------------------------------------------------------------------------------------------------------------------------------------------------------------------------------------------------------------------------------------------------------------------------------------------------------------------------------------------------------------------------------------------------------------------------------------------------------------------------|-----------|
| Knoops-2004 <sup>106</sup> | Healthy Ageing: a Longitudinal study in Europe | Europe  | 1988-2000 (10.00)                   | 64.43   | 70-90 (74.24) | White predominant          | <66.86                                  | general population | 2339        | Identification of CVD mortality (ICD-9, 390-459) and CHD mortality (ICD-9, 410-414) was not reported.         | Diet (fish): 1. ≥1 servings/d; 0. <1 serving/d.<br>Diet (milk): 1. almost daily; 0. <once/d.<br>Sleeping: 1. 5.5-7.4 h/d; 0. <5.5 h/d or >7.4 h/d.<br>Smoking: 1. never smokers or quitting >15 years; 0. quitting ≤15 years or current smokers.<br>Alcohol drinking: 1. >0 g/d; 0. none.<br>PA (Voorrips or Morris questionnaire): 1. the intermediate and the highest tertile; 0. the lowest tertile.<br>Diet (mMDS, dietary history method): 1. ≥4 points; 0. <4 points. | 8         |
| Meng-1999 <sup>120</sup>   | "Hawaii Department of Health survey"           | US      | 1975-1994 (15.36)                   | 49.50   | 18-NA (44.81) | White 31.06<br>Asian 62.61 | NA                                      | general population | 31700       | CHD mortality and stroke mortality were identified through the mortality files from the Department of Health. | Smoking: 4. never smokers; 3. former smokers; 2. current smokers ≤1 ppd; 1. current smokers 1.1-1.5 ppd; 0. current smokers >1.5 ppd.<br>Alcohol drinking (M/F): 1. 1-7/3 drinks/w; 0. none or >7/3 drinks/w.<br>BMI: 3. 19.6-24.8 kg/m <sup>2</sup> ; 2. <19.6 kg/m <sup>2</sup> or 24.9-29.2 kg/m <sup>2</sup> ; 1. 29.3-32.5 kg/m <sup>2</sup> ; 0. ≥32.6 kg/m <sup>2</sup> .                                                                                            | 8         |

| Author-year                  | Cohort                         | Country     | Follow-up duration (mean or median) | Men (%) | Age (mean)    | Ethnicity (%)*    | Proportion of high school graduates (%) | Health status      | Sample size | Outcome attainment                                                                                          | Definition of healthy lifestyle                                                                                                                                                                                                                                                                                                                                                                                                                                                                                                                                                                                                                                    | NOS score |
|------------------------------|--------------------------------|-------------|-------------------------------------|---------|---------------|-------------------|-----------------------------------------|--------------------|-------------|-------------------------------------------------------------------------------------------------------------|--------------------------------------------------------------------------------------------------------------------------------------------------------------------------------------------------------------------------------------------------------------------------------------------------------------------------------------------------------------------------------------------------------------------------------------------------------------------------------------------------------------------------------------------------------------------------------------------------------------------------------------------------------------------|-----------|
| Odegaard-2011 <sup>126</sup> | Singapore Chinese Health Study | Singapore   | 1993-2009 (11.75)                   | 45.09   | 45-74 (55.35) | Asian predominant | <32.70                                  | general population | 50466       | CHD mortality (ICD-9, 410.0-414.9 and 427.5) was identified through nationwide registry of birth and death. | Diet (fat intake from animal products): 1. >385 g/w; 0. ≤385 g/w.<br>Diet (fruit and vegetables consumption): 1. >1350 g/w; 0. ≤1350 g/w.<br>Smoking: 1. never smokers; 0. ever smokers.<br>Alcohol drinking: 1. 1-14 drinks/w; 0. none or >2 drinks/d.<br>PA: 1. MPA ≥2 h/w or any strenuous activity; 0. MPA <2 h/w or no strenuous activity.<br>BMI (age <65 years/ ≥65 years): 1. 18.5-21.5/24.5 kg/m <sup>2</sup> ; 0. <18.5 kg/m <sup>2</sup> or >21.5/24.5 kg/m <sup>2</sup> .<br>Diet (dietary pattern score characterized by high intake of vegetables, fruits, and soy, FFQ): 1. upper 60%; 0. lowest 40%.<br>Sleeping: 1. 6-8 h/d; 0. <6 h/d or ≥9 h/d. | 7         |
| Struijk-2014 <sup>162</sup>  | European Prospective           | Netherlands | 1993-2008 (12.20)                   | 25.90   | 20-70 (48.90) | White predominant | 20.70                                   | general population | 33671       | CHD cases (including IHD, cardiac arrest and sudden death; ICD-                                             | Alcohol drinking (M/F): 10. ≤20/10 g/d; 0. ≥60/40 g/d.<br>PA: 10. ≥3.5 h/w; 0. zero h/w.<br>Diet (vegetables, FFQ): 10. ≥200                                                                                                                                                                                                                                                                                                                                                                                                                                                                                                                                       | 9         |

| Author-year                    | Cohort                                                                           | Country   | Follow-up duration (mean or median) | Men (%) | Age (mean)    | Ethnicity (%)*    | Proportion of high school graduates (%) | Health status      | Sample size | Outcome attainment                                                                                                                   | Definition of healthy lifestyle                                                                                                                                                                                                                                                                                                                                                    | NOS score |
|--------------------------------|----------------------------------------------------------------------------------|-----------|-------------------------------------|---------|---------------|-------------------|-----------------------------------------|--------------------|-------------|--------------------------------------------------------------------------------------------------------------------------------------|------------------------------------------------------------------------------------------------------------------------------------------------------------------------------------------------------------------------------------------------------------------------------------------------------------------------------------------------------------------------------------|-----------|
|                                | Investigation into Cancer and Nutrition - Netherlands                            |           |                                     |         |               |                   |                                         |                    |             | 9, 410-414, 427.5, 798.1, 798.2, 798.9; ICD-10, I20-I25, I46, R96) were identified through Dutch Centre for Health Care Information. | g/d; 0. zero g/d.<br>Diet (fruit, FFQ): 10. $\geq$ 200 g/d; 0. zero g/d.<br>Diet (DF, FFQ): 10. $\geq$ 14 g/4.2MJ; 0. zero g/4.2MJ.<br>Diet (EPA/DHA, FFQ): 10. $\geq$ 450 mg/d; 0. zero mg/d.<br>Diet (SFA, FFQ): 10. $<$ 10%E; 0. $\geq$ 15%E.<br>Diet (mono trans-FA, FFQ): 10. $\geq$ 1%E; 0. $<$ 1%E.<br>Diet (sodium, FFQ): 10. $<$ 1.68 g/d; 0. $\geq$ 2.52 g/d.            |           |
| Tamosiunas-2014 <sup>137</sup> | MONITORING trends and determinants of Cardiovascular disease-Lithuania & Health, | Lithuania | 1983-2011 (13.30)                   | 46.13   | 45-64 (55.18) | White predominant | 63.66                                   | general population | 5635        | CHD mortality (ICD-9, 410-414; ICD-10, I20-I25) were identified through the regional mortality register.                             | Smoking: 1. never smokers; 0. ever smokers.<br>PA (LTPA): 1. $\geq$ 7 h/w; 0. $<$ 7 h/w.<br>BMI: 1. $<$ 25.0 kg/m <sup>2</sup> ; 0. $\geq$ 25.0 kg/m <sup>2</sup> .<br>SBP/DBP: 1. $<$ 120 and 80 mmHg (untreated); 0. $\geq$ 120 or 80 mmHg, or $<$ 120 and 80 mmHg (treated).<br>FBG: 1. $<$ 5.55 mmol/L; 0. $\geq$ 5.55 mmol/L.<br>TC: 1. $<$ 5.2 mmol/L; 0. $\geq$ 5.2 mmol/L. | 8         |

| Author-year                 | Cohort                                                                      | Country     | Follow-up duration (mean or median) | Men (%) | Age (mean)    | Ethnicity (%) <sup>*</sup> | Proportion of high school graduates (%) | Health status      | Sample size | Outcome attainment                                                                                                                                                                    | Definition of healthy lifestyle                                                                                                                                                                                                                                                                                                                                                                                                                                              | NOS score |
|-----------------------------|-----------------------------------------------------------------------------|-------------|-------------------------------------|---------|---------------|----------------------------|-----------------------------------------|--------------------|-------------|---------------------------------------------------------------------------------------------------------------------------------------------------------------------------------------|------------------------------------------------------------------------------------------------------------------------------------------------------------------------------------------------------------------------------------------------------------------------------------------------------------------------------------------------------------------------------------------------------------------------------------------------------------------------------|-----------|
| van Lee-2016 <sup>144</sup> | Alcohol and Psychosocial Factors in Eastern Europe Study<br>Rotterdam Study | Netherlands | 1990-2011 (20.00)                   | 40.47   | 55-NA (65.43) | White predominant          | 69.73                                   | general population | 2987        | CVD mortality (ICD-10, I00-I99), CHD mortality (ICD-10, I21, I24, I25, I46, I49, I50) and stroke mortality (ICD-10, I60-I69) were identified through municipal population registries. | Alcohol drinking (M/F): 1. ≤20/10 g/d; 0. >20/10 g/d.<br>PA: 1. ≥150 min/w; 0. <150 min/w.<br>Diet (vegetable consumption, FFQ): 1. 150-200 g/d; 0. <150 g/d or >200 g/d.<br>Diet (fruit consumption, FFQ): 1. ≥200 g/d; 0. <200 g/d.<br>Diet (DF, FFQ): 1. 30-40 g/d; 0. <30 g/d or >40 g/d.<br>Diet (fish consumption, FFQ): 1. ≥2 portions/w and ≥1 oily fish; 0. <2 portions/w or <1 oily fish.<br>Diet (SFA, FFQ): 1. <10%E; 0. ≥10%E.<br>Diet (mono trans-FA, FFQ): 1. | 9         |



| Author-year                 | Cohort                                                | Country | Follow-up duration (mean or median) | Men (%) | Age (mean)     | Ethnicity (%)*             | Proportion of high school graduates (%) | Health status      | Sample size | Outcome attainment                                                                | Definition of healthy lifestyle                                                                                                                                                                                                                                                                                                                                                                                                                          | NOS score |
|-----------------------------|-------------------------------------------------------|---------|-------------------------------------|---------|----------------|----------------------------|-----------------------------------------|--------------------|-------------|-----------------------------------------------------------------------------------|----------------------------------------------------------------------------------------------------------------------------------------------------------------------------------------------------------------------------------------------------------------------------------------------------------------------------------------------------------------------------------------------------------------------------------------------------------|-----------|
| Wingard-1982 <sup>147</sup> | Human Population Laboratory                           | US      | 1965-1974 (NA)                      | 47.17   | 30-69 (<53.28) | NA                         | NA                                      | general population | 4725        | All-cause mortality was identified through California Death Registry.             | <1%E; 0. ≥1%E.<br>Diet (salt, FFQ): 1. ≤6 g/d; 0. >6 g/d.<br>Smoking: 1. never smokers; 0. ever smokers.<br>Alcohol drinking: 1. <45 drinks/m; 0. >45 drinks/m.<br>PA: 1. active; 0. inactive.<br>Quetelet index (weight in pounds/(height in inches) <sup>2</sup> ) based on Metropolitan Life Insurance reports: 1. 9.9% underweight-29.9% overweight; 0. extreme underweight or overweight.<br>Sleeping: 1. 7-8 h/night; 0. <7 h/night or >8 h/night. | 7         |
| Yang-2012 <sup>148</sup>    | National Health and Nutrition Examination Surveys III | US      | 1988-2006 (14.50)                   | 48.20   | 20-NA (45.00)  | White 81.10<br>Black 11.10 | 61.88                                   | general population | 13312       | IHD mortality (ICD-10, I20-I25) were identified through the National Death Index. | Smoking: 1. not current smokers; 0. current smokers.<br>PA: 1. 3-5.9 METs for ≥5 times/w or ≥6 METs for ≥3 times/w; 0. 3-5.9 METs for <5 times/w and <6 METs for <3 times/w.<br>BMI: 1. <25 kg/m <sup>2</sup> ; 0. ≥25 kg/m <sup>2</sup> .<br>Diet (AHA, FFQ): 1. ≥2 points; 0. <2 points.<br>TC: 1. <200 mg/dl (untreated); 0.                                                                                                                          | 8         |

| Author-year               | Cohort                           | Country | Follow-up duration (mean or median) | Men (%) | Age (mean)    | Ethnicity (%)*    | Proportion of high school graduates (%) | Health status      | Sample size | Outcome attainment                                                                                          | Definition of healthy lifestyle                                                                                                                                                                                                                                                                                                                                                                                                                                              | NOS score |
|---------------------------|----------------------------------|---------|-------------------------------------|---------|---------------|-------------------|-----------------------------------------|--------------------|-------------|-------------------------------------------------------------------------------------------------------------|------------------------------------------------------------------------------------------------------------------------------------------------------------------------------------------------------------------------------------------------------------------------------------------------------------------------------------------------------------------------------------------------------------------------------------------------------------------------------|-----------|
|                           |                                  |         |                                     |         |               |                   |                                         |                    |             |                                                                                                             | <200 mg/dl (treated) or ≥200 mg/dl.<br>SBP/DBP: 1. <120 and 80 mmHg (untreated); 0. <120/80 mmHg (treated) or ≥120/80 mmHg.<br>HbA1c: 1. <5.7%; 0. ≥5.7%.                                                                                                                                                                                                                                                                                                                    |           |
| Stroke Mortality          |                                  |         |                                     |         |               |                   |                                         |                    |             |                                                                                                             |                                                                                                                                                                                                                                                                                                                                                                                                                                                                              |           |
| Eguchi-2017 <sup>51</sup> | Japan Collaborative Cohort Study | Japan   | 1988-2009 (19.30)                   | 43.24   | 40-79 (55.52) | Asian predominant | 63.88                                   | general population | 42647       | The cause and date of death were determined by reviewing death certificates. ICD-10 for stroke was I01-199. | Smoking: 1. not current smokers; 0. current smokers.<br>Alcohol drinking: 1. <2 gou/d (46g ethanol/d); 0. ≥2 gou/d.<br>PA: 1. ≥0.5 h/d or ≥5 h/w; 0. <0.5 h/d and <5 h/w.<br>BMI: 1. 21-25 kg/m <sup>2</sup> ; 0. <21 kg/m <sup>2</sup> or >25 kg/m <sup>2</sup> .<br>Diet (fruit): 1. ≥1 servings/d; 0. <1 serving/d.<br>Diet (fish): 1. ≥1 servings/d; 0. <1 serving/d.<br>Diet (milk): 1. almost daily; 0. <once/d.<br>Sleeping: 1. 5.5-7.4 h/d; 0. <5.5 h/d or >7.4 h/d. | 8         |
| Li-2018 <sup>1</sup>      | Nurses' Health Study &           | US      | 1980-2014 (27.20-33.90)             | 36.00   | 34-75 (48.96) | White 96.34       | Predominant                             | general population | 123219      | Stroke mortality was identified from state vital statistics                                                 | Smoking: 1. never smokers; 0. ever smokers.<br>Alcohol drinking (M/F): 1. 5-30/15                                                                                                                                                                                                                                                                                                                                                                                            | 8         |

| Author-year                  | Cohort                               | Country   | Follow-up duration (mean or median) | Men (%) | Age (mean)    | Ethnicity (%)*             | Proportion of high school graduates (%) | Health status      | Sample size | Outcome attainment                                                                         | Definition of healthy lifestyle                                                                                                                                                                                                                                                                                                                                                                                                                                                                                   | NOS score |
|------------------------------|--------------------------------------|-----------|-------------------------------------|---------|---------------|----------------------------|-----------------------------------------|--------------------|-------------|--------------------------------------------------------------------------------------------|-------------------------------------------------------------------------------------------------------------------------------------------------------------------------------------------------------------------------------------------------------------------------------------------------------------------------------------------------------------------------------------------------------------------------------------------------------------------------------------------------------------------|-----------|
|                              | Health Professionals Follow-Up Study |           |                                     |         |               |                            |                                         |                    |             | records, the National Death Index, reports by the families, and the postal system.         | g/d; 0. <5 g/d or >30/15 g/d. MVPA: 1. >30 min/d; 0. ≤30 min/d. BMI: 1. 18.5-24.9 kg/m <sup>2</sup> ; 0. <18.5 kg/m <sup>2</sup> or ≥25 kg/m <sup>2</sup> . Diet (AHEI, FFQ): 1. top 40% of each cohort distribution; 0. lower 60% of each cohort distribution.                                                                                                                                                                                                                                                   |           |
| Meng-1999 <sup>120</sup>     | "Hawaii Department of Health survey" | US        | 1975-1994 (15.36)                   | 49.50   | 18-NA (44.81) | White 31.06<br>Asian 62.61 | NA                                      | general population | 31700       | Stroke mortality was identified through the mortality files from the Department of Health. | Smoking: 4. never smokers; 3. former smokers; 2. current smokers ≤1 ppd; 1. current smokers 1.1-1.5 ppd; 0. current smokers >1.5 ppd. Alcohol drinking (M/F): 1. 1-7/3 drinks/w; 0. none or >7/3 drinks/w. BMI: 3. 19.6-24.8 kg/m <sup>2</sup> ; 2. <19.6 kg/m <sup>2</sup> or 24.9-29.2 kg/m <sup>2</sup> ; 1. 29.3-32.5 kg/m <sup>2</sup> ; 0. ≥32.6 kg/m <sup>2</sup> . Diet (fat intake from animal products): 1. >385 g/w; 0. ≤385 g/w. Diet (fruit and vegetables consumption): 1. >1350 g/w; 0. ≤1350 g/w. | 8         |
| Odegaard-2011 <sup>126</sup> | Singapore Chinese Health             | Singapore | 1993-2009 (11.75)                   | 45.09   | 45-74 (55.35) | Asian predominant          | <32.70                                  | general population | 50466       | CBVD mortality (ICD-9, 430.0-438.0) was identified through                                 | Smoking: 1. never smokers; 0. ever smokers. Alcohol drinking: 1. 1-14 drinks/w; 0. none or >2 drinks/d.                                                                                                                                                                                                                                                                                                                                                                                                           | 7         |

| Author-year                 | Cohort          | Country     | Follow-up duration (mean or median) | Men (%) | Age (mean)    | Ethnicity (%) <sup>*</sup> | Proportion of high school graduates (%) | Health status      | Sample size | Outcome attainment                                                                          | Definition of healthy lifestyle                                                                                                                                                                                                                                                                                                                                                                                                                              | NOS score |
|-----------------------------|-----------------|-------------|-------------------------------------|---------|---------------|----------------------------|-----------------------------------------|--------------------|-------------|---------------------------------------------------------------------------------------------|--------------------------------------------------------------------------------------------------------------------------------------------------------------------------------------------------------------------------------------------------------------------------------------------------------------------------------------------------------------------------------------------------------------------------------------------------------------|-----------|
|                             | Study           |             |                                     |         |               |                            |                                         |                    |             | nationwide registry of birth and death.                                                     | PA: 1. MPA $\geq 2$ h/w or any strenuous activity; 0. MPA $< 2$ h/w or no strenuous activity.<br>BMI (age $< 65$ years/ $\geq 65$ years): 1. 18.5-21.5/24.5 kg/m <sup>2</sup> ; 0. $< 18.5$ kg/m <sup>2</sup> or $> 21.5/24.5$ kg/m <sup>2</sup> .<br>Diet (dietary pattern score characterized by high intake of vegetables, fruits, and soy, FFQ): 1. upper 60%; 0. lowest 40%.<br>Sleeping: 1. 6-8 h/d; 0. $< 6$ h/d or $\geq 9$ h/d.                     |           |
| van Lee-2016 <sup>144</sup> | Rotterdam Study | Netherlands | 1990-2011 (20.00)                   | 40.47   | 55-NA (65.43) | White predominant          | 69.73                                   | general population | 2987        | Stroke mortality (ICD-10, I60-I69) were identified through municipal population registries. | Alcohol drinking (M/F): 1. $\leq 20/10$ g/d; 0. $> 20/10$ g/d.<br>PA: 1. $\geq 150$ min/w; 0. $< 150$ min/w.<br>Diet (vegetable consumption, FFQ): 1. 150-200 g/d; 0. $< 150$ g/d or $> 200$ g/d.<br>Diet (fruit consumption, FFQ): 1. $\geq 200$ g/d; 0. $< 200$ g/d.<br>Diet (DF, FFQ): 1. 30-40 g/d; 0. $< 30$ g/d or $> 40$ g/d.<br>Diet (fish consumption, FFQ): 1. $\geq 2$ portions/w and $\geq 1$ oily fish; 0. $< 2$ portions/w or $< 1$ oily fish. | 9         |

| Author-year | Cohort | Country | Follow-up duration (mean or median) | Men (%) | Age (mean) | Ethnicity (%)* | Proportion of high school graduates (%) | Health status | Sample size | Outcome attainment | Definition of healthy lifestyle                                                                                                 | NOS score |
|-------------|--------|---------|-------------------------------------|---------|------------|----------------|-----------------------------------------|---------------|-------------|--------------------|---------------------------------------------------------------------------------------------------------------------------------|-----------|
|             |        |         |                                     |         |            |                |                                         |               |             |                    | Diet (SFA, FFQ): 1. <10%E; 0. ≥10%E.<br>Diet (mono trans-FA, FFQ): 1. <1%E; 0. ≥1%E.<br>Diet (salt, FFQ): 1. ≤6 g/d; 0. >6 g/d. |           |

\* The percentage of ethnic groups may not sum to 100% since some participants belonged to the other ethnic groups or did not report the information.

%E, percentage of total energy intake; AHA, American Heart Association; AHEI, Alternative Healthy Eating Index; BMI, body mass index; CHD, coronary heart disease; DBP, diastolic blood pressure; DF, dietary fiber; DHA, docosahexaenoic acid; EPA, eicosapentaenoic acid; FA, fatty acid; FBG, fasting blood glucose; FFQ, food frequency questionnaire; HbA1c, glycosylated hemoglobin; ICD, International Classification of Diseases; IHD, ischemic heart disease; LTPA, leisure-time physical activity; M/F, for male and female respectively; MET, metabolic equivalent of task; MI, myocardial infarction; mMDS, modified Mediterranean diet score; MPA, moderate physical activity; MVPA, moderate to vigorous physical activity; NA, not available; NOS, Newcastle–Ottawa Scale; PA, physical activity; SBP, systolic blood pressure; SFA, saturated fatty acid; TC, total cholesterol; UK, the United Kingdom; US, the United States; VPA, vigorous physical activity.

**Table A7.** Characteristics of studies related to incident coronary heart disease, stroke, heart failure, hypertension, atrial fibrillation, and peripheral artery disease

| Author-year                 | Cohort                                | Country | Follow-up duration (mean or median) | Men (%) | Age (mean)    | Ethnicity (%)*                            | Proportion of high school graduates (%) | Health status      | Sample size | Outcome attainment                                                                                                                                                                                                    | Definition of healthy lifestyle                                                                                                                                                                                                                                                                                                                                                 | NOS score |
|-----------------------------|---------------------------------------|---------|-------------------------------------|---------|---------------|-------------------------------------------|-----------------------------------------|--------------------|-------------|-----------------------------------------------------------------------------------------------------------------------------------------------------------------------------------------------------------------------|---------------------------------------------------------------------------------------------------------------------------------------------------------------------------------------------------------------------------------------------------------------------------------------------------------------------------------------------------------------------------------|-----------|
| Incident CHD                |                                       |         |                                     |         |               |                                           |                                         |                    |             |                                                                                                                                                                                                                       |                                                                                                                                                                                                                                                                                                                                                                                 |           |
| Ahmed-2013 <sup>75</sup>    | Multi-Ethnic Study of Atherosclerosis | US      | 2000-2011 (7.60)                    | 47.00   | 44-84 (62.00) | White 62.00<br>Black 26.00<br>Asian 13.00 | 82.30                                   | general population | 6229        | CHD events consisting of nonfatal MI, resuscitated cardiac arrest, angina, coronary revascularization, and death due to CHD, were identified through death certificates, medical records, and next-of-kin interviews. | Smoking: 1. not current smokers; 0. current smokers.<br>PA: 1. MPA >150 min/w or VPA >75 min/w; 0. MPA ≤150 min/w and VPA ≤75 min/w.<br>BMI: 1. 18.5-24.9; 0. ≥25 or <18.5.<br>Diet (MDS, FFQ): 1. above the median; 0. below the median.                                                                                                                                       | 9         |
| Akesson-2007 <sup>173</sup> | "Swedish women 48 to 83 year"         | Sweden  | 1997-2003 (6.20)                    | 0       | 48-83 (59.18) | White predominant                         | >23.40                                  | general population | 24444       | MI cases (ICD-10, I21) were identified through the Swedish National Inpatient and Cause of Death Registers and the Swedish Death Registry.                                                                            | Smoking: 1. never smokers or quitting smoking ≥1 year; 0. quitting smoking <1 year or current smokers.<br>Alcohol drinking: 1. ≥5 g/d; 0. <5 g/d.<br>PA: 1. walked/cycled ≥40 min/d and vigorous exercise ≥1 h/w; 0. walked/cycled <40 min/d and vigorous exercise <1 h/w.<br>WC: 1. <85 cm; 0. ≥85 cm.<br>Diet (Healthy dietary pattern, consisting of vegetables, fruits, and | 8         |

| Author-year                 | Cohort                                           | Country | Follow-up duration (mean or median) | Men (%) | Age (mean)    | Ethnicity (%)*    | Proportion of high school graduates (%) | Health status      | Sample size | Outcome attainment                                                                                                                         | Definition of healthy lifestyle                                                                                                                                                                                                                                                                                                                                                                                                                                                                                                              | NOS score |
|-----------------------------|--------------------------------------------------|---------|-------------------------------------|---------|---------------|-------------------|-----------------------------------------|--------------------|-------------|--------------------------------------------------------------------------------------------------------------------------------------------|----------------------------------------------------------------------------------------------------------------------------------------------------------------------------------------------------------------------------------------------------------------------------------------------------------------------------------------------------------------------------------------------------------------------------------------------------------------------------------------------------------------------------------------------|-----------|
| Akesson-2014 <sup>174</sup> | "Swedish men 45 to 79 years"                     | Sweden  | 1997-2009 (11.00)                   | 100     | 45-79 (58.60) | White predominant | >19.60                                  | general population | 20721       | MI cases (ICD-10, I21) were identified through the Swedish National Inpatient and Cause of Death Registers and the Swedish Death Registry. | legumes, FFQ): 1. top 60%; 0. lower 40%.<br>Smoking: 1. never smokers or quitting smoking ≥20 years; 0. quitting smoking <20 years or current smokers.<br>Alcohol drinking: 1. 10-30 g/d; 0. <10 g/d or >30 g/d.<br>PA: 1. walked/cycled ≥40 min/d and vigorous exercise ≥1 h/w; 0. walked/cycled <40 min/d and vigorous exercise <1 h/w.<br>WC: 1. <95 cm; 0. ≥95 cm.<br>Diet (Recommended Food Score, consisting of fruits, vegetables, legumes, nuts, reduced-fat dairy products, whole grains, and fish, FFQ): 1. top 20%; 0. lower 80%. | 9         |
| Atkins-2018 <sup>77</sup>   | Clinical Practice Research Datalink & UK Biobank | UK      | 2000-2016 (6.25)                    | 48.83   | 60-69 (63.55) | White predominant | NA                                      | general population | 421411      | The methods of identifying CHD cases were not reported.                                                                                    | Clinical Practice Research Datalink:<br>Smoking: 2. never smokers; 1. former smokers; 0. current smokers.<br>PA: 2. vigorous activity; 1. moderate activity; 0. none or mild activity.<br>BMI: 2. <25 kg/ m <sup>2</sup> ; 1. 25-29.99 kg/ m <sup>2</sup> ; 0. ≥30 kg/ m <sup>2</sup> .                                                                                                                                                                                                                                                      | 7         |

| Author-year | Cohort | Country | Follow-up duration (mean or median) | Men (%) | Age (mean) | Ethnicity (%) <sup>*</sup> | Proportion of high school graduates (%) | Health status | Sample size | Outcome attainment | Definition of healthy lifestyle                                                                                                                                                                                                                                                                                                                                                                                                                                                                                                                                                                                                                                                                                                                                                                                                                                                                   | NOS score |
|-------------|--------|---------|-------------------------------------|---------|------------|----------------------------|-----------------------------------------|---------------|-------------|--------------------|---------------------------------------------------------------------------------------------------------------------------------------------------------------------------------------------------------------------------------------------------------------------------------------------------------------------------------------------------------------------------------------------------------------------------------------------------------------------------------------------------------------------------------------------------------------------------------------------------------------------------------------------------------------------------------------------------------------------------------------------------------------------------------------------------------------------------------------------------------------------------------------------------|-----------|
|             |        |         |                                     |         |            |                            |                                         |               |             |                    | <p>SBP/DBP: 2. &lt;120 and 80 mmHg (untreated); 1. 120-139 or 80-89 mmHg or &lt;120 and 80 mmHg (treated); 0. ≥140 or 90 mmHg.</p> <p>FSG: 2. &lt;5.6 mmol/l (not treated) or no data on FSG or diabetes; 1. 5.6-7 mmol/l (not treated) or &lt;5.6 mmol/l (treated), or diabetes diagnosis and not treated or with no treatment information; 0. &gt;7 mmol/l or diabetes diagnosis and treated.</p> <p>TC: 2. &lt;5.172 mmol/l (not treated) or no data on TC; 1. 5.172-6.21 mmol/l (not treated), or &lt;5.172 mmol/l (treated), or hypercholesterolemia diagnosis and not treated or with no treatment information; 0. &gt;6.21 mmol/l, or hypercholesterolemia diagnosis and treated.</p> <p>UK Biobank:</p> <p>Smoking: 2. never or quitting &gt;12 m; 1. quitting ≤12 m; 0. current.</p> <p>PA: 2. MPA ≥150 min/w, or VPA ≥75 min/w, or MVPA ≥150 min/w; 1. MPA 1-149 min/w, or VPA 1-74</p> |           |



| Author-year              | Cohort                     | Country | Follow-up duration (mean or median) | Men (%) | Age (mean)    | Ethnicity (%) <sup>*</sup> | Proportion of high school graduates (%) | Health status | Sample size | Outcome attainment                                                    | Definition of healthy lifestyle                                                                                                                                                                                                                                                                                                                                                                                                                                                                                                                                                                                                                                                                                                                                                                                                                 | NOS score |
|--------------------------|----------------------------|---------|-------------------------------------|---------|---------------|----------------------------|-----------------------------------------|---------------|-------------|-----------------------------------------------------------------------|-------------------------------------------------------------------------------------------------------------------------------------------------------------------------------------------------------------------------------------------------------------------------------------------------------------------------------------------------------------------------------------------------------------------------------------------------------------------------------------------------------------------------------------------------------------------------------------------------------------------------------------------------------------------------------------------------------------------------------------------------------------------------------------------------------------------------------------------------|-----------|
| Booth-2014 <sup>80</sup> | Reasons for Geographic and | US      | 2003-2009 (4.30)                    | 64.08   | 45-79 (68.79) | White 58.23<br>Black 41.77 | 82.73                                   | CHD patients  | 4174        | CHD (nonfatal MI or acute CHD death) was identified through telephone | min/w, or MVPA 1-149 min/w; 0. none.<br>BMI: 2. <25 kg/ m <sup>2</sup> ; 1. 25-29.99 kg/ m <sup>2</sup> ; 0. ≥30 kg/ m <sup>2</sup> .<br>SBP/DBP: 2. <120 and 80 mmHg (untreated); 1. 120-139 or 80-89 mmHg or <120 and 80 mmHg (treated); 0. ≥140 or 90 mmHg.<br>FSG: 2. no self-reported prevalent diabetes and no insulin medication; 1. self-reported prevalent diabetes but no insulin medication; 0. self-reported prevalent diabetes and insulin medication.<br>TC: 2. no self-reported prevalent high cholesterol and no cholesterol medication; 1. self-reported prevalent high cholesterol but no cholesterol medication; 0. self-reported prevalent high cholesterol and cholesterol medication.<br>Smoking: 1. not current smokers; 0. current smokers.<br>PA: 1. ≥4 times/w; 0. <4 times/w.<br>WC (M/F): 1. ≤102/88 cm; 0. >102/88 | 8         |

| Author-year                | Cohort                               | Country | Follow-up duration (mean or median) | Men (%) | Age (mean)    | Ethnicity (%) <sup>*</sup> | Proportion of high school graduates (%) | Health status      | Sample size | Outcome attainment                                                                                                                                                                                                                               | Definition of healthy lifestyle                                                                                                                                                                                                                                        | NOS score |
|----------------------------|--------------------------------------|---------|-------------------------------------|---------|---------------|----------------------------|-----------------------------------------|--------------------|-------------|--------------------------------------------------------------------------------------------------------------------------------------------------------------------------------------------------------------------------------------------------|------------------------------------------------------------------------------------------------------------------------------------------------------------------------------------------------------------------------------------------------------------------------|-----------|
|                            | Racial Difference in Stroke          |         |                                     |         |               |                            |                                         |                    |             | contacts with participants or proxies, adjudicated by medical records, death certificates, autopsy reports, online sources, and the National Death Index.                                                                                        | cm.<br>Diet (MDS, FFQ): 1. top 20%; 0. lower 80%.                                                                                                                                                                                                                      |           |
| Chiuve-2006 <sup>175</sup> | Health Professionals Follow-up Study | US      | 1986-2002 (NA)                      | 100     | 40-75 (53.50) | White predominant          | Predominant                             | general population | 33759       | Incident CHD (nonfatal MI or fatal CHD, confirmed MIs were defined according to WHO criteria, and cardiac-specific troponin levels when available) were identified through medical records, autopsy or hospital records, and some probable cases | Smoking: 1. not current smokers; 0. current smokers.<br>Alcohol drinking: 1. 5-30 g/d; 0. <5 g/d or >30 g/d.<br>PA: 1. MVPA ≥30 min/d; 0. MVPA <30 min/d.<br>BMI: 1. <25 kg/m <sup>2</sup> ; 0. ≥25 kg/m <sup>2</sup> .<br>Diet (AHEI, FFQ): 1. top 40%; 0. lower 60%. | 7         |

| Author-year                  | Cohort                   | Country | Follow-up duration (mean or median) | Men (%) | Age (mean)     | Ethnicity (%) <sup>*</sup> | Proportion of high school graduates (%) | Health status      | Sample size | Outcome attainment                                                                                                                                                                                                                                | Definition of healthy lifestyle                                                                                                                                                                                                                                                                                                                                                                                                      | NOS score      |
|------------------------------|--------------------------|---------|-------------------------------------|---------|----------------|----------------------------|-----------------------------------------|--------------------|-------------|---------------------------------------------------------------------------------------------------------------------------------------------------------------------------------------------------------------------------------------------------|--------------------------------------------------------------------------------------------------------------------------------------------------------------------------------------------------------------------------------------------------------------------------------------------------------------------------------------------------------------------------------------------------------------------------------------|----------------|
| Chomistek-2015 <sup>49</sup> | Nurses' Health Study II  | US      | 1991-2011 (NA)                      | 0       | 27-44 (37.10)  | White predominant          | Predominant                             | general population | 88940       | Incident CHD (nonfatal MI according to WHO criteria including symptoms and either diagnostic ECG changes or elevated cardiac enzymes, or fatal CHD) were self-reported and further confirmed by medical records, and autopsy or hospital records. | Smoking: 1. not current smokers; 0. current smokers.<br>Alcohol drinking: 1. 0.1-14.9 g/d; 0. none or $\geq 15$ g/d.<br>PA: 1. MVPA $\geq 2.5$ h/w; 0. MVPA $< 2.5$ h/w.<br>Sedentary behavior (watching television): 1. $\leq 7$ h/w; 0. $> 7$ h/w.<br>BMI: 1. 18.5-24.9 kg/m <sup>2</sup> ; 0. $< 18.5$ kg/m <sup>2</sup> or $\geq 25$ kg/m <sup>2</sup> .<br>Diet (AHEI-2010, FFQ): 1. top 40% ( $\geq 47$ points); 0. lower 60%. | 8 <sup>†</sup> |
| Dong-2012 <sup>90</sup>      | Northern Manhattan Study | US      | 1993-2011 (11.00)                   | 36.30   | 40-107 (69.00) | White 75.00<br>Black 24.99 | 43.20                                   | general population | 2981        | MI cases were identified through telephone interviews and verified by a positive screen.                                                                                                                                                          | Smoking: 1. never smokers or quitting $> 1$ year; 0. quitting $\leq 1$ year or current smokers;<br>PA: 1. MPA $\geq 150$ min/w or VPA $\geq 75$ min/w or MVPA $\geq 150$ min/w; 0. MPA $< 150$ min/w and VPA $< 75$ min/w and MVPA $< 150$ min/w.<br>BMI: 1. $< 25$ kg/m <sup>2</sup> ; 0. $\geq 25$ kg/m <sup>2</sup> .<br>Diet (AHA, FFQ): 1. 4-5 components; 0. 0-3 components.<br>SBP/DBP: 1. $< 120$ and 80 mmHg (not           | 8              |

| Author-year                 | Cohort                       | Country | Follow-up duration (mean or median) | Men (%) | Age (mean)    | Ethnicity (%) <sup>*</sup> | Proportion of high school graduates (%) | Health status      | Sample size | Outcome attainment                                                                                                                                                                                                                                                                                                                                      | Definition of healthy lifestyle                                                                                                                                                                                                                                                                                                                                                                                                                                                                     | NOS score |
|-----------------------------|------------------------------|---------|-------------------------------------|---------|---------------|----------------------------|-----------------------------------------|--------------------|-------------|---------------------------------------------------------------------------------------------------------------------------------------------------------------------------------------------------------------------------------------------------------------------------------------------------------------------------------------------------------|-----------------------------------------------------------------------------------------------------------------------------------------------------------------------------------------------------------------------------------------------------------------------------------------------------------------------------------------------------------------------------------------------------------------------------------------------------------------------------------------------------|-----------|
| Eriksen-2015 <sup>156</sup> | Southall and Brent Revisited | UK      | 1988-2011 (21.00)                   | 84.56   | 40-69 (52.09) | White 52.00<br>Asian 48.00 | NA                                      | general population | 2096        | CVD included fatal CHD (deaths caused by angina, MI or its sequelae or atherosclerotic heart disease. ICD-9, 410-415; ICD-10, I200-I259), fatal stroke (deaths caused from following ICD-9 codes 430-439 or ICD-10 codes I600-I698), and non-fatal CHD and stroke. CHD included fatal CHD and nonfatal CHD. Outcomes were identified through health and | treated); 0. <120 and 80 mmHg (treated) or ≥120 or 80 mmHg. FPG: 1. <100 mg/dl (not treated); 0. <100 mg/dl (treated) ≥100 mg/d. TC: 1. <200 mg/dl (not treated); 0. or <200 mg/dl (treated) ≥200 mg/dl. Smoking: 1. not current smokers; 0. current smokers. Alcohol drinking (M/F): 1. 1-21/14 units/w; 0. <1 or >21/14 units/w. PA: 1. MPA ≥5 h/w or VPA ≥2.5 h/w; 0. MPA <5 h/w and VPA <2.5 h/w. Diet (vegetables and fruits, simple dietary questionnaire): 1. ≥5.5 times/w; 0. <5.5 times/w. | 7         |

| Author-year             | Cohort                                                               | Country | Follow-up duration (mean or median) | Men (%) | Age (mean)    | Ethnicity (%)*    | Proportion of high school graduates (%) | Health status      | Sample size | Outcome attainment                                                                                                                                                                                  | Definition of healthy lifestyle                                                                                                                                                                                                                                       | NOS score |
|-------------------------|----------------------------------------------------------------------|---------|-------------------------------------|---------|---------------|-------------------|-----------------------------------------|--------------------|-------------|-----------------------------------------------------------------------------------------------------------------------------------------------------------------------------------------------------|-----------------------------------------------------------------------------------------------------------------------------------------------------------------------------------------------------------------------------------------------------------------------|-----------|
|                         |                                                                      |         |                                     |         |               |                   |                                         |                    |             |                                                                                                                                                                                                     | lifestyle questionnaires, medical record review, attendance at a study clinic visit, and the Office of National Statistics.                                                                                                                                           |           |
| Ford-2009 <sup>69</sup> | European Prospective Investigation into Cancer and Nutrition-Potsdam | Germany | 1994-2006 (7.80)                    | 38.72   | 35-65 (49.30) | White predominant | 62.40                                   | general population | 23153       | MI cases (diagnosed according to WHO MONItoring trends and determinants of CARDiovascular disease criteria; ICD-10, I21) were identified through self-reports and verified through medical records. | Smoking: 1. never smokers; 0. ever smokers.<br>PA: 1. ≥3.5 h/w; 0. <3.5 h/w.<br>BMI: 1. <30 kg/m <sup>2</sup> ; 0. ≥30 kg/mw.<br>Diet (summed z score consisting of fruits and vegetables, whole grain bread, and red meat consumption, FFQ): 1. >median; 0. ≤median. | 8         |

| Author-year               | Cohort                                     | Country | Follow-up duration (mean or median) | Men (%) | Age (mean)     | Ethnicity (%)* | Proportion of high school graduates (%) | Health status      | Sample size | Outcome attainment                                                        | Definition of healthy lifestyle                                                                                                                                                                                                                                                                                                                                                                                                                                                                                                                                                                                                                                     | NOS score |
|---------------------------|--------------------------------------------|---------|-------------------------------------|---------|----------------|----------------|-----------------------------------------|--------------------|-------------|---------------------------------------------------------------------------|---------------------------------------------------------------------------------------------------------------------------------------------------------------------------------------------------------------------------------------------------------------------------------------------------------------------------------------------------------------------------------------------------------------------------------------------------------------------------------------------------------------------------------------------------------------------------------------------------------------------------------------------------------------------|-----------|
| Han-2018 <sup>157</sup>   | Prediction for ASCVD Risk in China project | China   | 1998-2015 (7.24)                    | 40.22   | 20->65 (51.64) | Asian 100      | NA                                      | general population | 93987       | CHD cases were identified through hospital records or death certificates. | 7-point score:<br>Smoking: 1. never smokers or former smokers quitting >12 m; 0. current smokers or former smokers quitting ≤12 m.<br>PA: 1. MPA ≥150 min/w or VPA ≥75 min/w or MVPA ≥150 min/w; 0. MPA <150 min/w and VPA <75 min/w and MVPA <150 min/w.<br>BMI: 1. <25 kg/m <sup>2</sup> ; 0. ≥25 kg/m <sup>2</sup> .<br>Diet (AHA, FFQ): 1. 4-5 components; 0-3 components.<br>SBP/DBP: 1. <120/80 mmHg (untreated); 0. <120/80 mmHg (treated) or ≥120/80 mmHg.<br>FBG: 1. <100 mg/dl (untreated); 0. <100 mg/dl (treated) or ≥100 mg/dl.<br>TC: 1. <200 mg/dl (untreated); 0. <200 mg/dl (treated) or ≥200 mg/dl.<br>4-point score: smoking, PA, BMI, and diet. | 9         |
| Khera-2016 <sup>176</sup> | Atherosclerosis Risk in Commun             | US      | 1987-NA (19.76)                     | 23.38   | 45-64 (55.82)  | NA             | NA                                      | general population | 51425       | CHD events including MI, coronary revascularization,                      | Smoking: 1. not current smokers; 0. current smokers.<br>PA: 1. ≥once /w; 0. <once /w.<br>BMI: 1. <30 kg/m <sup>2</sup> ; 0. ≥30 kg/m <sup>2</sup> .                                                                                                                                                                                                                                                                                                                                                                                                                                                                                                                 | 8         |

| Author-year                | Cohort                                                                                                                                                                         | Country | Follow-up duration (mean or median) | Men (%) | Age (mean)       | Ethnicity (%) <sup>*</sup> | Proportion of high school graduates (%) | Health status         | Sample size | Outcome attainment                                                                                                                                                                                                                                                                                                 | Definition of healthy lifestyle                                                                                                                                                                                                                                                                                                                                                                                                                                                                                                                                                                                                                                                                                                                                                                                                                      | NOS score |
|----------------------------|--------------------------------------------------------------------------------------------------------------------------------------------------------------------------------|---------|-------------------------------------|---------|------------------|----------------------------|-----------------------------------------|-----------------------|-------------|--------------------------------------------------------------------------------------------------------------------------------------------------------------------------------------------------------------------------------------------------------------------------------------------------------------------|------------------------------------------------------------------------------------------------------------------------------------------------------------------------------------------------------------------------------------------------------------------------------------------------------------------------------------------------------------------------------------------------------------------------------------------------------------------------------------------------------------------------------------------------------------------------------------------------------------------------------------------------------------------------------------------------------------------------------------------------------------------------------------------------------------------------------------------------------|-----------|
| Lachman-2016 <sup>65</sup> | ities<br>Study & Malmö<br>Diet and Cancer<br>Study & Women's<br>Genome Health<br>Study<br>European<br>Prospective<br>Investigation into<br>Cancer and<br>Nutrition<br>-Norfolk | UK      | 1993-2008<br>(10.00)                | 44.10   | 39-79<br>(57.00) | White 99.50                | 53.38                                   | general<br>population | 10043       | and death from<br>coronary causes,<br>were identified<br>through medical<br>records.<br><br>CVD cases<br>including CHD<br>(ICD-10, I20-I25)<br>and stroke were<br>identified through<br>the East Norfolk<br>Health Authority<br>database and death<br>certificates (ICD-<br>10, CHD, I20-I25;<br>stroke, I60-I63). | Diet (score consisting of fruits, nuts,<br>vegetables, whole grains, fish, dairy<br>products, refined grains, processed<br>meats, unprocessed red meats, and<br>SSB, FFQ): 1. $\geq 6$ points; 0. $< 6$<br>points.<br><br>Smoking: 2. never smokers; 1. ever<br>smokers; 0. current smokers;<br>PA: 2. sedentary job with $> 1.0$ h/d<br>recreational activity or standing job<br>with 0.5 h/d recreational activity or<br>physical job with at least some<br>recreational activity or heavy manual<br>job; 1. sedentary job with 0.1-1.0 h/d<br>recreational activity or standing job<br>with $\leq 0.5$ h/d recreational activity or<br>physical job with no recreational<br>activity; 0. sedentary job and no<br>recreational activity.<br>BMI: 2. $< 25$ kg/m <sup>2</sup> ; 1. 25-29.99<br>kg/m <sup>2</sup> ; 0. $\geq 30$ kg/m <sup>2</sup> . | 7         |

| Author-year             | Cohort                             | Country | Follow-up duration (mean or median) | Men (%) | Age (mean)    | Ethnicity (%) <sup>*</sup> | Proportion of high school graduates (%) | Health status      | Sample size | Outcome attainment                                                                                                                                                                                                                | Definition of healthy lifestyle                                                                                                                                                                                                                                                                                                                                                                                                      | NOS score |
|-------------------------|------------------------------------|---------|-------------------------------------|---------|---------------|----------------------------|-----------------------------------------|--------------------|-------------|-----------------------------------------------------------------------------------------------------------------------------------------------------------------------------------------------------------------------------------|--------------------------------------------------------------------------------------------------------------------------------------------------------------------------------------------------------------------------------------------------------------------------------------------------------------------------------------------------------------------------------------------------------------------------------------|-----------|
| Lee-2009 <sup>110</sup> | Aerobics Center Longitudinal Study | US      | 1971-2003 (14.70)                   | 100     | 30-79 (44.13) | White >95.00               | >70.00                                  | general population | 23657       | CHD events including nonfatal MI, coronary revascularization and definite fatal CHD (ICD-9, 410-414; ICD-10, I20-I25) were identified from mail-back health surveys and the National Death Index and official death certificates. | Diet (AHA, FFQ): 2. 4-5 components; 1. 2-3 components; 0. 0-1 components.<br>SBP/DBP: 2. <120 and 80 mmHg (not treated); 1. 120-139 or 80-89 mmHg, or <120 and 80 mmHg (treated) 0. ≥140 or 90 mmHg.<br>HbA1c: 2. <5.7%; 1. 5.7-6.5%; 0. ≥6.5%.<br>TC: 2. <5.2 mmol/l; 1. 5.2-6.2 mmol/l; 0. ≥6.2 mmol/l.<br>Smoking: 1. never smoking; 0. ever smoking.<br>Fitness (CRF): 1. higher 80%; 0. lower 20%.<br>WC: 1. <94 cm; 0. ≥94 cm. | 7         |
| Leger-                  | "Fred"                             | US      | 2010-2016                           | 46.74   | 20.20-        | White 89.15                | NA                                      | hematopoi          | 2198        | IHD (not specified)                                                                                                                                                                                                               | Smoking: 1. not current smokers; 0.                                                                                                                                                                                                                                                                                                                                                                                                  | 6         |



| Author-year             | Cohort                                                      | Country | Follow-up duration (mean or median) | Men (%) | Age (mean)       | Ethnicity (%)*    | Proportion of high school graduates (%) | Health status                       | Sample size | Outcome attainment                                                                                                                                            | Definition of healthy lifestyle                                                                                                                                                                                                                                                                                                                                                                                             | NOS score |
|-------------------------|-------------------------------------------------------------|---------|-------------------------------------|---------|------------------|-------------------|-----------------------------------------|-------------------------------------|-------------|---------------------------------------------------------------------------------------------------------------------------------------------------------------|-----------------------------------------------------------------------------------------------------------------------------------------------------------------------------------------------------------------------------------------------------------------------------------------------------------------------------------------------------------------------------------------------------------------------------|-----------|
| 2018 <sup>111</sup>     | Hutchinson Cancer Research Center Study"                    |         | (NA)                                |         | 83.30<br>(55.90) |                   |                                         | etic cell transplantation survivors |             | in the article) were identified through annual surveys and annual contact with families, referring providers, and periodic searches of public sources.        | current smokers.<br>PA: 1. VPA $\geq$ 75 min/w or MPA $\geq$ 150 min/w; 0. VPA <75 min/w and MPA <150 min/w.<br>Diet (fruit/vegetable intake): 1. $\geq$ 5 servings/d; 0. <5 servings/d.                                                                                                                                                                                                                                    |           |
| Liu-2018 <sup>159</sup> | Nurses' Health Study & Health Professionals Follow-Up Study | US      | 1980-2014<br>(13.30)                | 22.18   | 34-75<br>(62.61) | White 95.13       | Predominant                             | diabetes patients                   | 11527       | CHD cases including coronary artery bypass graft surgery and nonfatal MI (ascertained according to the WHO criteria) were identified through medical records. | 5-point score:<br>Smoking: 1. not current smokers; 0. current smokers.<br>Alcohol drinking (M/F): 1. 5-30/15 g/d; 0. <5 g/d or >30/15 g/d.<br>MVPA: 1. $\geq$ 150 min/w; 0. <150 min/w.<br>BMI: 1. <25.0 kg/m <sup>2</sup> ; 0. $\geq$ 25.0 kg/m <sup>2</sup> .<br>Diet (AHEI, FFQ): 1. top 40% of each cohort distribution; 0. lower 60% of each cohort distribution.<br>4-point score: smoking, drinking, MVPA, and diet. | 9         |
| Lv-2017 <sup>177</sup>  | China Kadoorie Biobank                                      | China   | 2004-2015<br>(7.20)                 | 41.01   | 30-79<br>(50.69) | Asian predominant | <49.45                                  | general population                  | 461211      | IHD cases (including IHD death and nonfatal                                                                                                                   | Smoking: 1. never smokers or stopped for reasons other than illness; 0. current smokers or stopped                                                                                                                                                                                                                                                                                                                          | 9         |

| Author-year             | Cohort        | Country | Follow-up duration (mean or median) | Men (%) | Age (mean) | Ethnicity (%) <sup>*</sup> | Proportion of high school graduates (%) | Health status      | Sample size | Outcome attainment                                                                             | Definition of healthy lifestyle                                                                                                                                                                                                                                                                                                                                                                                                                                                                                                                                                                                                                                                                                                                                                                                                                                                                                                                                                                                                                 | NOS score |
|-------------------------|---------------|---------|-------------------------------------|---------|------------|----------------------------|-----------------------------------------|--------------------|-------------|------------------------------------------------------------------------------------------------|-------------------------------------------------------------------------------------------------------------------------------------------------------------------------------------------------------------------------------------------------------------------------------------------------------------------------------------------------------------------------------------------------------------------------------------------------------------------------------------------------------------------------------------------------------------------------------------------------------------------------------------------------------------------------------------------------------------------------------------------------------------------------------------------------------------------------------------------------------------------------------------------------------------------------------------------------------------------------------------------------------------------------------------------------|-----------|
| Miao-2015 <sup>71</sup> | Kailuan study | China   | 2006-2013 (6.81)                    | 79.50   | NA (51.60) | Asian predominant          | >6.90                                   | general population | 91598       | MI cases were identified through discharge summaries, medical records, and death certificates. | MI) were identified through local disease and death registries, the national health insurance system, and active follow-up.<br>for illness.<br>Alcohol drinking: 1. 0.1-29.9 g/d; 0. none or $\geq 30$ g/d.<br>PA: 1. sex-specific upper quarter of the PA level; 0. sex-specific lower three-quarter of the PA level.<br>BMI: 1. 18.5-23.9 kg/m <sup>2</sup> ; 0. <18.5 kg/m <sup>2</sup> or $\geq 24.0$ kg/m <sup>2</sup> .<br>WHR (M/F): 1. <0.90/0.85; 0. $\geq 0.90/0.85$ .<br>Diet (FFQ): 1. eating vegetables, fruits, and wheat every day and red meat less than daily; 0. not eating vegetables, fruits or wheat every day, or eat red meat daily.<br>Smoking: 2. never smokers; 1. former smokers; 0. current smokers.<br>PA: 2. $\geq 80$ min/w; 1. 0-80 min/w; 2. never exercise.<br>BMI: 2. <25 kg/m <sup>2</sup> ; 1. 25-29.9 kg/m <sup>2</sup> ; 0. $\geq 30$ kg/m <sup>2</sup> .<br>Diet: 2. light salt intake; 1. moderate salt intake; 0. heavy salt intake.<br>SBP/DBP: 2. <120 and 80 mmHg (untreated); 1. 120-139 or 80-89 | 9         |

| Author-year             | Cohort                                    | Country | Follow-up duration (mean or median) | Men (%) | Age (mean)    | Ethnicity (%) <sup>*</sup> | Proportion of high school graduates (%) | Health status      | Sample size | Outcome attainment                                                                                                             | Definition of healthy lifestyle                                                                                                                                                                                                                                                                                                                                                                                                                                                                                                                                                                                                                                                                                                                                                            | NOS score |
|-------------------------|-------------------------------------------|---------|-------------------------------------|---------|---------------|----------------------------|-----------------------------------------|--------------------|-------------|--------------------------------------------------------------------------------------------------------------------------------|--------------------------------------------------------------------------------------------------------------------------------------------------------------------------------------------------------------------------------------------------------------------------------------------------------------------------------------------------------------------------------------------------------------------------------------------------------------------------------------------------------------------------------------------------------------------------------------------------------------------------------------------------------------------------------------------------------------------------------------------------------------------------------------------|-----------|
| Mok-2018 <sup>122</sup> | Atherosclerosis Risk in Communities Study | US      | 1987-2013 (24.20)                   | 43.80   | 45-64 (54.50) | White 75.60<br>Black 24.40 | 70.50                                   | general population | 13079       | MI cases were collected from hospital discharges for insurance status, medical history, and inpatient pharmacologic treatment. | mmHg (untreated) or <120 and 80 mmHg (treated); 0. ≥140 or 90 mmHg.<br>FBG: 2. <100 mg/dl (untreated); 1. 100-125 mg/dl (untreated) or <100 mg/dl (treated); 0. ≥126 mg/dl.<br>TC: 2. <200 mg/dl (untreated); 1. 200-239 mg/dl (untreated) or <200 mg/dl (treated); 0. ≥ 240 mg/dl.<br>Smoking: 2. never smokers and former smokers quitting >1 year; 1. former smokers quitting ≤1 year; 0. current smokers.<br>MVPA: 2. ≥150 min/w; 1. 1-150 min/w; 0. none.<br>BMI: 2. <25 kg/m <sup>2</sup> ; 1. 25-29.9 kg/m <sup>2</sup> ; 0. ≥30 kg/m <sup>2</sup> .<br>Diet (AHA, FFQ): 2. 4-5 components; 1. 2-3 components; 0. 0-1 component.<br>SBP/DBP: 2. <120/80 mmHg (untreated); 1. <120/80 mmHg (treated) and 120-139/80-89 mmHg; 0. ≥140/90 mmHg.<br>FBG: 2. <5.6 mmol/l (untreated); 1. | 7         |

| Author-year                 | Cohort                                                                     | Country     | Follow-up duration (mean or median) | Men (%) | Age (mean)    | Ethnicity (%)*    | Proportion of high school graduates (%) | Health status      | Sample size | Outcome attainment                                                                                                                                                                                   | Definition of healthy lifestyle                                                                                                                                                                                                                                                                                                                                                                                                                                                                                                                                                                                    | NOS score |
|-----------------------------|----------------------------------------------------------------------------|-------------|-------------------------------------|---------|---------------|-------------------|-----------------------------------------|--------------------|-------------|------------------------------------------------------------------------------------------------------------------------------------------------------------------------------------------------------|--------------------------------------------------------------------------------------------------------------------------------------------------------------------------------------------------------------------------------------------------------------------------------------------------------------------------------------------------------------------------------------------------------------------------------------------------------------------------------------------------------------------------------------------------------------------------------------------------------------------|-----------|
| Struijk-2014 <sup>162</sup> | European Prospective Investigation into Cancer and Nutrition - Netherlands | Netherlands | 1993-2008 (12.20)                   | 25.90   | 20-70 (48.90) | White predominant | 20.70                                   | general population | 33671       | CHD cases (including IHD, cardiac arrest, and sudden death, ICD-9, 410-414, 427.5, 798.1, 798.2, 798.9; ICD-10, I20-I25, I46, R96) were identified through Dutch Centre for Health Care Information. | <5.6 mmol/l (treated) or 5.6-6.9 mmol/l; 0. ≥7.0 mmol/l.<br>TC: 2. <5.2 mmol/l (untreated); 1. <5.2 mmol/l (treated) or 5.2-6.1 mmol/l; 0. ≥6.2 mmol/l.<br>Alcohol drinking (M/F): 10. ≤20/10 g/d; 0. ≥60/40 g/d.<br>PA: 10. ≥3.5 h/w; 0. zero h/w.<br>Diet (vegetables, FFQ): 10. ≥200 g/d; 0. zero g/d.<br>Diet (fruit, FFQ): 10. ≥200 g/d; 0. zero g/d.<br>Diet (DF, FFQ): 10. ≥14 g/4.2MJ; 0. zero g/4.2MJ.<br>Diet (EPA/DHA, FFQ): 10. ≥450 mg/d; 0. zero mg/d.<br>Diet (SFA, FFQ): 10. <10%E; 0. ≥15%E.<br>Diet (mono trans-FA, FFQ): 10. ≥1%E; 0. <1%E.<br>Diet (sodium, FFQ): 10. <1.68 g/d; 0. ≥2.52 g/d. | 9         |
| Taubman-2009 <sup>178</sup> | Nurses' Health Study                                                       | US          | 1982-2002 (NA)                      | 0       | 36-55 (NA)    | White predominant | Predominant                             | general population | 78746       | Methods for identifying fatal and nonfatal MI cases                                                                                                                                                  | Smoking: 1. not current smokers; 0. current smokers.<br>Alcohol drinking: 1. ≥5 g alcohol/d;                                                                                                                                                                                                                                                                                                                                                                                                                                                                                                                       | 7         |

| Author-year              | Cohort                                                                                             | Country | Follow-up duration (mean or median) | Men (%) | Age (mean)    | Ethnicity (%)* | Proportion of high school graduates (%) | Health status      | Sample size | Outcome attainment                                                                                                                                                                                                      | Definition of healthy lifestyle                                                                                                                                                                                                                                                                                                                                                                                                                                                                                                   | NOS score |
|--------------------------|----------------------------------------------------------------------------------------------------|---------|-------------------------------------|---------|---------------|----------------|-----------------------------------------|--------------------|-------------|-------------------------------------------------------------------------------------------------------------------------------------------------------------------------------------------------------------------------|-----------------------------------------------------------------------------------------------------------------------------------------------------------------------------------------------------------------------------------------------------------------------------------------------------------------------------------------------------------------------------------------------------------------------------------------------------------------------------------------------------------------------------------|-----------|
|                          |                                                                                                    |         |                                     |         |               |                |                                         |                    |             | were not reported.                                                                                                                                                                                                      | 0. <5 g alcohol/d.<br>PA: 1. ≥30 min/d; 0. <30 min/d.<br>BMI: 1. <25 kg/m <sup>2</sup> ; 0. ≥25 kg/m <sup>2</sup> .<br>Diet (score consisting of trans fat, glycemic load, cereal fiber, marine n-3 fatty acids, folate, and the ratio of PUFA to SFA): 1. top two quintiles; 0. lower three quintiles.                                                                                                                                                                                                                           |           |
| Zhou-2018 <sup>152</sup> | The People's Republic of China-USA Collaborative Study of Cardiovascular and Coronary Epidemiology | China   | 1983-2005 (20.30)                   | 49.57   | 35-59 (45.80) | Asian 100      | NA                                      | general population | 938         | CVD cases were defined as MI, CHD, sudden cardiac death, fatal or nonfatal stroke, and were identified through death certificates or hospital records obtained from next-of-kin or local death registration department. | Smoking: 1. never smokers; 0. ever smokers.<br>PA: 1. took part in physical exercises regularly; 0. not took part in physical exercises regularly.<br>BMI: 1. <24 kg/m <sup>2</sup> ; 0. ≥24 kg/m <sup>2</sup> .<br>Diet (AHA, 24-h dietary recall): 1. 4-5 components; 0. 0-3 components.<br>SBP/DBP: 1. <120/80 mmHg (untreated); 0. <120/80 mmHg (treated) or ≥120/80 mmHg.<br>FBG: 1. <100 mg/dl (untreated); 0. <100 mg/dl (treated) or ≥100 mg/dl.<br>TC: 1. <200 mg/dl (untreated); 0. <200 mg/dl (treated) or ≥200 mg/dl. | 8         |

Incident Stroke

| Author-year               | Cohort                                           | Country | Follow-up duration (mean or median) | Men (%) | Age (mean)    | Ethnicity (%)*    | Proportion of high school graduates (%) | Health status      | Sample size | Outcome attainment                                         | Definition of healthy lifestyle                                                                                                                                                                                                                                                                                                                                                                                                                                                                                                                                                                                                                                                                                                                                                                                                                                                                         | NOS score |
|---------------------------|--------------------------------------------------|---------|-------------------------------------|---------|---------------|-------------------|-----------------------------------------|--------------------|-------------|------------------------------------------------------------|---------------------------------------------------------------------------------------------------------------------------------------------------------------------------------------------------------------------------------------------------------------------------------------------------------------------------------------------------------------------------------------------------------------------------------------------------------------------------------------------------------------------------------------------------------------------------------------------------------------------------------------------------------------------------------------------------------------------------------------------------------------------------------------------------------------------------------------------------------------------------------------------------------|-----------|
| Atkins-2018 <sup>77</sup> | Clinical Practice Research Datalink & UK Biobank | UK      | 2000-2016 (6.25)                    | 48.83   | 60-69 (63.55) | White predominant | NA                                      | general population | 421411      | The methods of identifying stroke cases were not reported. | Clinical Practice Research Datalink: Smoking: 2. never smokers; 1. former smokers; 0. current smokers. PA: 2. vigorous activity; 1. moderate activity; 0. none or mild activity. BMI: 2. <25 kg/ m <sup>2</sup> ; 1. 25-29.99 kg/ m <sup>2</sup> ; 0. ≥30 kg/ m <sup>2</sup> . SBP/DBP: 2. <120 and 80 mmHg (untreated); 1. 120-139 or 80-89 mmHg or <120 and 80 mmHg (treated); 0. ≥140 or 90 mmHg. FSG: 2. <5.6 mmol/l (not treated) or no data on FSG or diabetes; 1. 5.6-7 mmol/l (not treated) or <5.6 mmol/l (treated), or diabetes diagnosis and not treated or with no treatment information; 0. >7 mmol/l or diabetes diagnosis and treated. TC: 2. <5.172 mmol/l (not treated) or no data on TC; 1. 5.172-6.21 mmol/l (not treated), or <5.172 mmol/l (treated), or hypercholesterolemia diagnosis and not treated or with no treatment information; 0. >6.21 mmol/l, or hypercholesterolemia | 7         |

| Author-year | Cohort | Country | Follow-up duration (mean or median) | Men (%) | Age (mean) | Ethnicity (%) <sup>*</sup> | Proportion of high school graduates (%) | Health status | Sample size | Outcome attainment | Definition of healthy lifestyle                                                                                                                                                                                                                                                                                                                                                                                                                                                                                                                                                                                                                                                                                                                                                                                                                                               | NOS score |
|-------------|--------|---------|-------------------------------------|---------|------------|----------------------------|-----------------------------------------|---------------|-------------|--------------------|-------------------------------------------------------------------------------------------------------------------------------------------------------------------------------------------------------------------------------------------------------------------------------------------------------------------------------------------------------------------------------------------------------------------------------------------------------------------------------------------------------------------------------------------------------------------------------------------------------------------------------------------------------------------------------------------------------------------------------------------------------------------------------------------------------------------------------------------------------------------------------|-----------|
|             |        |         |                                     |         |            |                            |                                         |               |             |                    | <p>diagnosis and treated.</p> <p>UK Biobank:</p> <p>Smoking: 2. never or quitting &gt;12 m; 1. quitting ≤12 m; 0. current.</p> <p>PA: 2. MPA ≥150 min/w, or VPA ≥75 min/w, or MVPA ≥150 min/w; 1. MPA 1-149 min/w, or VPA 1-74 min/w, or MVPA 1-149 min/w; 0. none.</p> <p>BMI: 2. &lt;25 kg/ m<sup>2</sup>; 1. 25-29.99 kg/ m<sup>2</sup>; 0. ≥30 kg/ m<sup>2</sup>.</p> <p>SBP/DBP: 2. &lt;120 and 80 mmHg (untreated); 1. 120-139 or 80-89 mmHg or &lt;120 and 80 mmHg (treated); 0. ≥140 or 90 mmHg.</p> <p>FSG: 2. no self-reported prevalent diabetes and no insulin medication; 1. self-reported prevalent diabetes but no insulin medication; 0. self-reported prevalent diabetes and insulin medication.</p> <p>TC: 2. no self-reported prevalent high cholesterol and no cholesterol medication; 1. self-reported prevalent high cholesterol but no cholesterol</p> |           |

| Author-year                | Cohort                                                      | Country | Follow-up duration (mean or median) | Men (%) | Age (mean) | Ethnicity (%)*    | Proportion of high school graduates (%) | Health status      | Sample size | Outcome attainment                                                                                                                                                                                                                                                                                                                                             | Definition of healthy lifestyle                                                                                                                                                                                                                                                                                                                                         | NOS score |
|----------------------------|-------------------------------------------------------------|---------|-------------------------------------|---------|------------|-------------------|-----------------------------------------|--------------------|-------------|----------------------------------------------------------------------------------------------------------------------------------------------------------------------------------------------------------------------------------------------------------------------------------------------------------------------------------------------------------------|-------------------------------------------------------------------------------------------------------------------------------------------------------------------------------------------------------------------------------------------------------------------------------------------------------------------------------------------------------------------------|-----------|
| Chiuvè-2008 <sup>179</sup> | Health Professionals Follow-up Study & Nurses' Health Study | US      | 1986-2004 (>19.56)                  | 38.01   | NA (53.50) | White predominant | Predominant                             | general population | 114928      | Confirmed strokes (neurological deficit, rapid or sudden onset, lasting ≥24 h or until death, National Survey of Stroke criteria) were identified through self-reported physician diagnosis, adjudicated by medical records. If medical records are unavailable, the cases will be designated as probable cases (25% in Nurses' Health Study and 23% in Health | medication; 0. self-reported prevalent high cholesterol and cholesterol medication.<br>Smoking: 1. not current smokers; 0. current smokers.<br>Alcohol drinking (M/F): 1. 5-30/15 g/d; 0. <5 g/d or >30/15 g/d.<br>PA: 1. MPA ≥30 min/d; 0. MPA <30 min/d.<br>BMI: 1. <25 kg/m <sup>2</sup> ; 0. ≥25 kg/m <sup>2</sup> .<br>Diet (AHEI, FFQ): 1. top 40%; 0. lower 60%. | 7         |



| Author-year             | Cohort                   | Country | Follow-up duration (mean or median) | Men (%) | Age (mean)     | Ethnicity (%) <sup>*</sup> | Proportion of high school graduates (%) | Health status      | Sample size | Outcome attainment                                                                                                                                                                                                                                                                                        | Definition of healthy lifestyle                                                                                                                                                                                                                                                                                                                                                                                                        | NOS score |
|-------------------------|--------------------------|---------|-------------------------------------|---------|----------------|----------------------------|-----------------------------------------|--------------------|-------------|-----------------------------------------------------------------------------------------------------------------------------------------------------------------------------------------------------------------------------------------------------------------------------------------------------------|----------------------------------------------------------------------------------------------------------------------------------------------------------------------------------------------------------------------------------------------------------------------------------------------------------------------------------------------------------------------------------------------------------------------------------------|-----------|
| Dong-2012 <sup>90</sup> | Northern Manhattan Study | US      | 1993-2011 (11.00)                   | 36.30   | 40-107 (69.00) | White 75.00<br>Black 24.99 | 43.20                                   | general population | 2981        | Professionals (Follow-up Study). Fatal stroke cases were identified by next of kin, postal authorities or the National Death Index and confirmed by medical records, autopsy reports and death certificates. Stroke cases were identified through telephone interviews and verified by a positive screen. | Smoking: 1. never smokers or quitting >1 year; 0. quitting ≤1 year or current smokers;<br>PA: 1. MPA ≥150 min/w or VPA ≥75 min/w or MVPA ≥150 min/w; 0. MPA <150 min/w and VPA <75 min/w and MVPA <150 min/w.<br>BMI: 1. <25 kg/m <sup>2</sup> ; 0. ≥25 kg/m <sup>2</sup> .<br>Diet (AHA, FFQ): 1. 4-5 components; 0. 0-3 components.<br>SBP/DBP: 1. <120 and 80 mmHg (not treated); 0. <120 and 80 mmHg (treated) or ≥120 or 80 mmHg. | 8         |

| Author-year             | Cohort                                                               | Country | Follow-up duration (mean or median) | Men (%) | Age (mean)     | Ethnicity (%)*    | Proportion of high school graduates (%) | Health status      | Sample size | Outcome attainment                                                                                                       | Definition of healthy lifestyle                                                                                                                                                                                                                                       | NOS score |
|-------------------------|----------------------------------------------------------------------|---------|-------------------------------------|---------|----------------|-------------------|-----------------------------------------|--------------------|-------------|--------------------------------------------------------------------------------------------------------------------------|-----------------------------------------------------------------------------------------------------------------------------------------------------------------------------------------------------------------------------------------------------------------------|-----------|
|                         |                                                                      |         |                                     |         |                |                   |                                         |                    |             |                                                                                                                          | FPG: 1. <100 mg/dl (not treated); 0. <100 mg/dl (treated) ≥100 mg/d.<br>TC: 1. <200 mg/dl (not treated); 0. or <200 mg/dl (treated) ≥200 mg/dl.                                                                                                                       |           |
| Ford-2009 <sup>69</sup> | European Prospective Investigation into Cancer and Nutrition-Potsdam | Germany | 1994-2006 (7.80)                    | 38.72   | 35-65 (49.30)  | White predominant | 62.40                                   | general population | 23153       | Stroke cases (ICD-10, I160, I161, I163, I164) were identified through self-reports and verified through medical records. | Smoking: 1. never smokers; 0. ever smokers.<br>PA: 1. ≥3.5 h/w; 0. <3.5 h/w.<br>BMI: 1. <30 kg/m <sup>2</sup> ; 0. ≥30 kg/mw.<br>Diet (summed z score consisting of fruits and vegetables, whole grain bread, and red meat consumption, FFQ): 1. >median; 0. ≤median. | 8         |
| Han-2018 <sup>157</sup> | Prediction for ASCVD Risk in China project                           | China   | 1998-2015 (7.24)                    | 40.22   | 20->65 (51.64) | Asian 100         | NA                                      | general population | 93987       | Stroke cases were identified through hospital records or death certificates.                                             | 7-point score:<br>Smoking: 1. never smokers or former smokers quitting >12 m; 0. current smokers or former smokers quitting ≤12 m.<br>PA: 1. MPA ≥150 min/w or VPA ≥75 min/w or MVPA ≥150 min/w; 0. MPA <150 min/w and VPA <75 min/w and MVPA <150 min/w.             | 9         |

| Author-year                       | Cohort                                                  | Country | Follow-up duration (mean or median) | Men (%) | Age (mean)    | Ethnicity (%) <sup>*</sup> | Proportion of high school graduates (%) | Health status      | Sample size | Outcome attainment                                                                                                                                                                                             | Definition of healthy lifestyle                                                                                                                                                                                                                                                                                                                                                                                                                                                                                                                                                                                                                                                                                                                                                                                                              | NOS score |
|-----------------------------------|---------------------------------------------------------|---------|-------------------------------------|---------|---------------|----------------------------|-----------------------------------------|--------------------|-------------|----------------------------------------------------------------------------------------------------------------------------------------------------------------------------------------------------------------|----------------------------------------------------------------------------------------------------------------------------------------------------------------------------------------------------------------------------------------------------------------------------------------------------------------------------------------------------------------------------------------------------------------------------------------------------------------------------------------------------------------------------------------------------------------------------------------------------------------------------------------------------------------------------------------------------------------------------------------------------------------------------------------------------------------------------------------------|-----------|
| Kulshreshtha -2013 <sup>180</sup> | Reasons for Geographic and Racial Differences in Stroke | US      | 2003-2010 (4.90)                    | 42.00   | 45-98 (65.00) | White 58.31<br>Black 41.69 | 89.14                                   | general population | 22914       | Stroke events (defined according to the WHO definition, and those characterized by symptoms lasting <24 h with neuroimaging consistent with acute ischemia or hemorrhage were also defined) were identified by | BMI: 1. <25 kg/m <sup>2</sup> ; 0. ≥25 kg/m <sup>2</sup> .<br>Diet (AHA, FFQ): 1. 4-5 components; 0-3 components.<br>SBP/DBP: 1. <120/80 mmHg (untreated); 0. <120/80 mmHg (treated) or ≥120/80 mmHg.<br>FBG: 1. <100 mg/dl (untreated); 0. <100 mg/dl (treated) or ≥100 mg/dl.<br>TC: 1. <200 mg/dl (untreated); 0. <200 mg/dl (treated) or ≥200 mg/dl.<br>4-point score: smoking, PA, BMI, and diet.<br>Smoking: 2. never smokers or quitting >1 year; 1. quitting ≤1 year; 0. current smokers.<br>PA: 2. intense PA ≥4 times/w; 1. intense PA 1-3 times/w; 0. no PA.<br>BMI: 2. <25 kg/m <sup>2</sup> ; 1. 25-29.99 kg/m <sup>2</sup> ; 0. ≥30 kg/m <sup>2</sup> .<br>Diet (AHA, FFQ): 2. 4-5 components; 1. 2-3 components; 0. 0-1 components.<br>SBP/DBP: 2. <120 and 80 mmHg (untreated); 1. 120-139 or 80-89 mmHg or <120 and 80 mmHg | 8         |

| Author-year                 | Cohort                     | Country | Follow-up duration (mean or median) | Men (%) | Age (mean)    | Ethnicity (%) <sup>*</sup> | Proportion of high school graduates (%) | Health status      | Sample size | Outcome attainment                                                                                                                                                                                                                        | Definition of healthy lifestyle                                                                                                                                                                                                                                                                                                                                                                                                                                                          | NOS score |
|-----------------------------|----------------------------|---------|-------------------------------------|---------|---------------|----------------------------|-----------------------------------------|--------------------|-------------|-------------------------------------------------------------------------------------------------------------------------------------------------------------------------------------------------------------------------------------------|------------------------------------------------------------------------------------------------------------------------------------------------------------------------------------------------------------------------------------------------------------------------------------------------------------------------------------------------------------------------------------------------------------------------------------------------------------------------------------------|-----------|
|                             |                            |         |                                     |         |               |                            |                                         |                    |             | contacting with participants or their proxies medical records                                                                                                                                                                             | (treated); 0. $\geq$ 140 or 90 mmHg. FBG: 2. <100 mg/dl (untreated); 1. 100-125 mg/dl or <100 mg/dl (treated); 0. $\geq$ 126 mg/dl. TC: 2. <200 mg/dl (untreated); 1. 200-239 mg/dl or <200 mg/dl (treated); 0. $\geq$ 240 mg/dl.                                                                                                                                                                                                                                                        |           |
| Larsson-2014 <sup>181</sup> | Swedish Mammography Cohort | Sweden  | 1998-2008 (10.40)                   | 0       | 49-83 (60.95) | White predominant          | >20.29                                  | general population | 31696       | Stroke cases (ICD-10, cerebral infarction I63, intracerebral hemorrhage I61, subarachnoid hemorrhage I60, and unspecified stroke I64) were identified from the Swedish National Patient Register and the Swedish Cause of Death Register. | Smoking: 1. never smokers; 0. ever smokers.<br>Drinking: 1. 5-15 g/d; 0. <5 g/d or >15 g/d.<br>PA: 1. walking/bicycling $\geq$ 40 min/d and exercise $\geq$ 1 h/w; 0. walking/bicycling <40 min/d or exercise <1 h/w.<br>BMI: 1. <25 kg/m <sup>2</sup> ; 0. $\geq$ 25 kg/m <sup>2</sup> .<br>Diet (Recommended Food Score consisting of fruits, vegetables, legumes, nuts, low-fat dairy foods, whole-grain foods, and fish, FFQ): 1. above the median (21 points); 0. below the median. | 8         |
| Larsson-2015 <sup>182</sup> | Cohort of                  | Sweden  | 1997-2008 (9.80)                    | 100     | 45-79 (59.00) | White predominant          | >18.00                                  | general population | 35455       | Stroke cases including ischemic                                                                                                                                                                                                           | Smoking: 1. not current smokers; 0. current smokers.                                                                                                                                                                                                                                                                                                                                                                                                                                     | 9         |

| Author-year             | Cohort                                               | Country | Follow-up duration (mean or median) | Men (%) | Age (mean)    | Ethnicity (%)* | Proportion of high school graduates (%) | Health status     | Sample size | Outcome attainment                                                                                                                                                                               | Definition of healthy lifestyle                                                                                                                                                                                                                                                                                                                                                                 | NOS score |
|-------------------------|------------------------------------------------------|---------|-------------------------------------|---------|---------------|----------------|-----------------------------------------|-------------------|-------------|--------------------------------------------------------------------------------------------------------------------------------------------------------------------------------------------------|-------------------------------------------------------------------------------------------------------------------------------------------------------------------------------------------------------------------------------------------------------------------------------------------------------------------------------------------------------------------------------------------------|-----------|
|                         | Swedish Men                                          |         |                                     |         |               |                |                                         |                   |             | stroke (ICD-10, I63), hemorrhagic stroke (ICD-10, I60-I61) and unspecified stroke (I64) were identified through the Swedish National Inpatient Register and the Swedish Cause of Death Register. | Alcohol drinking: 1. 0.1-30 g/d; 0. none or >30 g/d.<br>PA (walking/bicycling or exercise): 1. ≥150 min/w; 0. <150 min/w.<br>BMI: 1. 18.5-25 kg/m <sup>2</sup> ; 0. ≥25 kg/m <sup>2</sup> .<br>Diet (≥5 servings/d fruits and vegetables and <30 g/d processed meat, FFQ): 1. yes; 0. no.                                                                                                       |           |
| Liu-2018 <sup>159</sup> | Nurses' Health Study & Professionals Follow-Up Study | US      | 1980-2014 (13.30)                   | 22.18   | 34-75 (62.61) | White 95.13    | Predominant                             | diabetes patients | 11527       | Nonfatal stroke cases defined based on the National Survey of Stroke criteria were identified through medical records.                                                                           | 5-point score:<br>Smoking: 1. not current smokers; 0. current smokers.<br>Alcohol drinking (M/F): 1. 5-30/15 g/d; 0. <5 g/d or >30/15 g/d.<br>MVPA: 1. ≥150 min/w; 0. <150 min/w.<br>BMI: 1. <25.0 kg/m <sup>2</sup> ; 0. ≥25.0 kg/m <sup>2</sup> .<br>Diet (AHEI, FFQ): 1. top 40% of each cohort distribution; 0. lower 60% of each cohort distribution.<br>4-point score: smoking, drinking, | 9         |

| Author-year             | Cohort                 | Country | Follow-up duration (mean or median) | Men (%) | Age (mean)    | Ethnicity (%) <sup>*</sup> | Proportion of high school graduates (%) | Health status      | Sample size | Outcome attainment                                                                                                                                                       | Definition of healthy lifestyle                                                                                                                                                                                                                                                                                                                                                                                                                                                                                                                                                                                                 | NOS score |
|-------------------------|------------------------|---------|-------------------------------------|---------|---------------|----------------------------|-----------------------------------------|--------------------|-------------|--------------------------------------------------------------------------------------------------------------------------------------------------------------------------|---------------------------------------------------------------------------------------------------------------------------------------------------------------------------------------------------------------------------------------------------------------------------------------------------------------------------------------------------------------------------------------------------------------------------------------------------------------------------------------------------------------------------------------------------------------------------------------------------------------------------------|-----------|
| Lv-2017 <sup>177</sup>  | China Kadoorie Biobank | China   | 2004-2015 (7.20)                    | 41.01   | 30-79 (50.69) | Asian predominant          | <49.45                                  | general population | 461211      | Ischemic stroke cases (ICD-10, I20-I25, and I63) were identified through local disease and death registries, the national health insurance system, and active follow-up. | MVPA, and diet.<br>Smoking: 1. never smokers or stopped for reasons other than illness; 0. current smokers or stopped for illness.<br>Alcohol drinking: 1. 0.1-29.9 g/d; 0. none or ≥30 g/d.<br>PA: 1. sex-specific upper quarter of the PA level; 0. sex-specific lower three-quarter of the PA level.<br>BMI: 1. 18.5-23.9 kg/m <sup>2</sup> ; 0. <18.5 kg/m <sup>2</sup> or ≥24.0 kg/m <sup>2</sup> .<br>WHR (M/F): 1. <0.90/0.85; 0. ≥0.90/0.85.<br>Diet (FFQ): 1. eating vegetables, fruits, and wheat every day and red meat less than daily; 0. not eating vegetables, fruits or wheat every day, or eat red meat daily. | 9         |
| Miao-2015 <sup>71</sup> | Kailuan study          | China   | 2006-2013 (6.81)                    | 79.50   | NA (51.60)    | Asian predominant          | >6.90                                   | general population | 91598       | Stroke cases were identified through discharge summaries, medical records, and death certificates.                                                                       | Smoking: 2. never smokers; 1. former smokers; 0. current smokers.<br>PA: 2. ≥80 min/w; 1. 0-80 min/w; 2. never exercise.<br>BMI: 2. <25 kg/m <sup>2</sup> ; 1. 25-29.9 kg/m <sup>2</sup> ; 0. ≥30 kg/m <sup>2</sup> .                                                                                                                                                                                                                                                                                                                                                                                                           | 9         |

| Author-year             | Cohort                                    | Country | Follow-up duration (mean or median) | Men (%) | Age (mean)    | Ethnicity (%) <sup>*</sup> | Proportion of high school graduates (%) | Health status                  | Sample size | Outcome attainment                                                                                                                       | Definition of healthy lifestyle                                                                                                                                                                                                                                                                                                                                                                                                                                                                                                                                                                                                                                                                                                                                                                                 | NOS score |
|-------------------------|-------------------------------------------|---------|-------------------------------------|---------|---------------|----------------------------|-----------------------------------------|--------------------------------|-------------|------------------------------------------------------------------------------------------------------------------------------------------|-----------------------------------------------------------------------------------------------------------------------------------------------------------------------------------------------------------------------------------------------------------------------------------------------------------------------------------------------------------------------------------------------------------------------------------------------------------------------------------------------------------------------------------------------------------------------------------------------------------------------------------------------------------------------------------------------------------------------------------------------------------------------------------------------------------------|-----------|
| Mok-2018 <sup>122</sup> | Atherosclerosis Risk in Communities Study | US      | 1987-2013 (3.30)                    | 43.80   | 45-64 (54.50) | White 75.60<br>Black 24.40 | 70.50                                   | myocardial infarction patients | 1277        | Stroke was defined as incident definite or probable strokes identified by a computer algorithm using National Survey of Stroke criteria. | Diet: 2. light salt intake; 1. moderate salt intake; 0. heavy salt intake.<br>SBP/DBP: 2. <120 and 80 mmHg (untreated); 1. 120-139 or 80-89 mmHg (untreated) or <120 and 80 mmHg (treated); 0. ≥140 or 90 mmHg.<br>FBG: 2. <100 mg/dl (untreated); 1. 100-125 mg/dl (untreated) or <100 mg/dl (treated); 0. ≥126 mg/dl.<br>TC: 2. <200 mg/dl (untreated); 1. 200-239 mg/dl (untreated) or <200 mg/dl (treated); 0. ≥ 240 mg/dl.<br>Smoking: 2. never smokers and former smokers quitting >1 year; 1. former smokers quitting ≤1 year; 0. current smokers.<br>MVPA: 2. ≥150 min/w; 1. 1-150 min/w; 0. none.<br>BMI: 2. <25 kg/m <sup>2</sup> ; 1. 25-29.9 kg/m <sup>2</sup> ; 0. ≥30 kg/m <sup>2</sup> .<br>Diet (AHA, FFQ): 2. 4-5 components; 1. 2-3 components; 0. 0-1 component.<br>SBP/DBP: 2. <120/80 mmHg | 7         |

| Author-year               | Cohort                                                               | Country | Follow-up duration (mean or median) | Men (%) | Age (mean)    | Ethnicity (%) <sup>*</sup> | Proportion of high school graduates (%) | Health status      | Sample size | Outcome attainment                                                                             | Definition of healthy lifestyle                                                                                                                                                                                                                                                                                                                                                                                                                                                                                                                                        | NOS score |
|---------------------------|----------------------------------------------------------------------|---------|-------------------------------------|---------|---------------|----------------------------|-----------------------------------------|--------------------|-------------|------------------------------------------------------------------------------------------------|------------------------------------------------------------------------------------------------------------------------------------------------------------------------------------------------------------------------------------------------------------------------------------------------------------------------------------------------------------------------------------------------------------------------------------------------------------------------------------------------------------------------------------------------------------------------|-----------|
| Myint-2009 <sup>183</sup> | European Prospective Investigation into Cancer and Nutrition-Norfolk | UK      | 1993-2007 (11.50)                   | 44.75   | 40-79 (58.27) | White 99.50                | 53.38                                   | general population | 20040       | Stroke cases were identified through death certificate data and hospital record linkage.       | (untreated); 1. <120/80 mmHg (treated) and 120-139/80-89 mmHg; 0. ≥140/90 mmHg.<br>FBG: 2. <5.6 mmol/l (untreated); 1. <5.6 mmol/l (treated) or 5.6-6.9 mmol/l; 0. ≥7.0 mmol/l.<br>TC: 2. <5.2 mmol/l (untreated); 1. <5.2 mmol/l (treated) or 5.2-6.1 mmol/l; 0. ≥6.2 mmol/l.<br>Smoking: 1. not current smokers; 0. current smokers.<br>Alcohol drinking: 1. 1-14 units/w; 0. none or >14 units/w.<br>PA: 1. non-sedentary occupation or LTPA ≥30 min/d; 0. sedentary occupation and LTPA <30 min/d.<br>Diet (plasma vitamin C level): 1. ≥50 μmol/l; 0. <50 μmol/l. | 8         |
| Pase-2016 <sup>184</sup>  | Framingham Offspring cohort                                          | US      | 1998-2011 (>12.57)                  | 45.00   | 45-89 (62.00) | White predominant          | 96.00                                   | general population | 2631        | Stroke was defined as focal neurological symptoms of rapid onset and presumed vascular origin, | Smoking: 1. never or quitting >12 m; 0. current or quitting ≤12 m.<br>PA: 1. MPA ≥150 min/w or VPA ≥75 min/w or MVPA ≥75 min/w; 0. MPA <150 min/w and VPA <75 min/w and MVPA <75 min/w.                                                                                                                                                                                                                                                                                                                                                                                | 7         |



| Author-year             | Cohort               | Country | Follow-up duration (mean or median) | Men (%) | Age (mean)    | Ethnicity (%) <sup>*</sup> | Proportion of high school graduates (%) | Health status      | Sample size | Outcome attainment                                                                                                                                                                                    | Definition of healthy lifestyle                                                                                                                                                                                                                                                                                                                                                                                                                                                                                                                                                                                                                                                                                                                                                                                                                                                                 | NOS score |
|-------------------------|----------------------|---------|-------------------------------------|---------|---------------|----------------------------|-----------------------------------------|--------------------|-------------|-------------------------------------------------------------------------------------------------------------------------------------------------------------------------------------------------------|-------------------------------------------------------------------------------------------------------------------------------------------------------------------------------------------------------------------------------------------------------------------------------------------------------------------------------------------------------------------------------------------------------------------------------------------------------------------------------------------------------------------------------------------------------------------------------------------------------------------------------------------------------------------------------------------------------------------------------------------------------------------------------------------------------------------------------------------------------------------------------------------------|-----------|
| Rist-2016 <sup>58</sup> | Women's Health Study | US      | 1992-NA (17.20)                     | 0       | 45-NA (54.67) | White 94.42<br>Black 2.17  | 44.06                                   | general population | 37634       | lasting >24 hours or resulting in death within 24 hours, and was identified through medical records.<br><br>Stroke cases were identified through self-reported data and confirmed by medical records. | BMI: 1. <25 kg/m <sup>2</sup> ; 0. ≥25 kg/m <sup>2</sup> .<br>Diet (score consisting of fruit and vegetables, fish, fiber-rich whole grains, sodium, and SSB consumption, FFQ): 1. >2 components; 0. ≤2 components.<br>SBP/DBP: 1. <120 and 80 mmHg (not treated); 0. ≥120 or 80 mmHg, or <120 and 80 mmHg (treated).<br>FPG: 1. <100 mg/dl (not treated); 0. ≥100 mg/dl or <100 mg/dl (treated).<br>TC: 1. <200 mg/dl (treated); 0. ≥200 mg/dl or <200 mg/dl (treated).<br>Smoking: 0. current smokers smoking ≥15 cigarettes/d; 1. current smokers smoking <15 cigarettes/d; 2. former smokers smoking ≥20 pack-years; 3. past smokers smoking <20 pack-year; 4. never smokers.<br>Alcohol drinking: 0. never; 1. <1 drink/w; 2. ≥10.5 drinks/w; 3. 1-3 drinks/w; 4. 4-10.4 drinks/w.<br>PA (strenuous exercise): 0. rarely or never; 1. <once /w; 2. once /w; 3. 2-3 times/w; 4. ≥4 times/w. | 7         |

| Author-year                 | Cohort                                                                     | Country     | Follow-up duration (mean or median) | Men (%) | Age (mean)    | Ethnicity (%)*    | Proportion of high school graduates (%) | Health status      | Sample size | Outcome attainment                                                                                                        | Definition of healthy lifestyle                                                                                                                                                                                                                                                                                                                                                                                                                                                                                                                                                                                                                                                                                                                                                                                                                                                                                                                                                                                                                                                                                            | NOS score |
|-----------------------------|----------------------------------------------------------------------------|-------------|-------------------------------------|---------|---------------|-------------------|-----------------------------------------|--------------------|-------------|---------------------------------------------------------------------------------------------------------------------------|----------------------------------------------------------------------------------------------------------------------------------------------------------------------------------------------------------------------------------------------------------------------------------------------------------------------------------------------------------------------------------------------------------------------------------------------------------------------------------------------------------------------------------------------------------------------------------------------------------------------------------------------------------------------------------------------------------------------------------------------------------------------------------------------------------------------------------------------------------------------------------------------------------------------------------------------------------------------------------------------------------------------------------------------------------------------------------------------------------------------------|-----------|
| Struijk-2014 <sup>162</sup> | European Prospective Investigation into Cancer and Nutrition - Netherlands | Netherlands | 1993-2008 (12.20)                   | 25.90   | 20-70 (48.90) | White predominant | 20.70                                   | general population | 33671       | Stroke (ICD-9, 430-434, 436; ICD-10, I60-I66) cases were identified through the Dutch Centre for Health Care Information. | <p>BMI: 0. <math>\geq 35.0</math> kg/m<sup>2</sup>; 1. 30.0-34.9 kg/m<sup>2</sup>; 2. 25.0-29.9 kg/m<sup>2</sup>; 3. 22.0-24.9 kg/m<sup>2</sup>; 4. <math>&lt; 22.0</math> kg/m<sup>2</sup>.</p> <p>Diet (score consisting of cereal fiber, folate, the ratio of PUFA to SFA, omega-3 fatty acids, trans fats, and glycemic load, FFQ): 0. quintile 1; 1. quintile 2; 2. quintile 3; 3. quintile 4; 4. quintile 5.</p> <p>Alcohol drinking (M/F): 10. <math>\leq 20/10</math> g/d; 0. <math>\geq 60/40</math> g/d.</p> <p>PA: 10. <math>\geq 3.5</math> h/w; 0. zero h/w.</p> <p>Diet (vegetables, FFQ): 10. <math>\geq 200</math> g/d; 0. zero g/d.</p> <p>Diet (fruit, FFQ): 10. <math>\geq 200</math> g/d; 0. zero g/d.</p> <p>Diet (DF, FFQ): 10. <math>\geq 14</math> g/4.2MJ; 0. zero g/4.2MJ.</p> <p>Diet (EPA/DHA, FFQ): 10. <math>\geq 450</math> mg/d; 0. zero mg/d.</p> <p>Diet (SFA, FFQ): 10. <math>&lt; 10\%</math>E; 0. <math>\geq 15\%</math>E.</p> <p>Diet (mono trans-FA, FFQ): 10. <math>\geq 1\%</math>E; 0. <math>&lt; 1\%</math>E.</p> <p>Diet (sodium, FFQ): 10. <math>&lt; 1.68</math> g/d; 0.</p> | 9         |

| Author-year                  | Cohort                                                               | Country | Follow-up duration (mean or median) | Men (%) | Age (mean)    | Ethnicity (%) <sup>*</sup> | Proportion of high school graduates (%) | Health status      | Sample size | Outcome attainment                                                                                                                                                       | Definition of healthy lifestyle                                                                                                                                                                                                                                                                                               | NOS score |
|------------------------------|----------------------------------------------------------------------|---------|-------------------------------------|---------|---------------|----------------------------|-----------------------------------------|--------------------|-------------|--------------------------------------------------------------------------------------------------------------------------------------------------------------------------|-------------------------------------------------------------------------------------------------------------------------------------------------------------------------------------------------------------------------------------------------------------------------------------------------------------------------------|-----------|
|                              |                                                                      |         |                                     |         |               |                            |                                         |                    |             |                                                                                                                                                                          | ≥2.52 g/d.                                                                                                                                                                                                                                                                                                                    |           |
| Zhang-2011 <sup>73</sup>     | MONItoring trends and determinants of Cardiovascular disease-Finland | Finland | 1982-2007 (13.70)                   | 47.12   | 25-74 (45.81) | White predominant          | <90.58                                  | general population | 36686       | Stroke cases (including fatal and nonfatal cases; ICD-8/9, 430-438; ICD-10, I60-I66) were identified through Statistics Finland and National Hospital Discharge Register | Smoking: 1. never smokers; 0. ever smokers; Alcohol drinking (M/F): 1. 1-209/139 g/w; 0. none or ≥210/140 g/w. PA: 1. moderate or high level of occupational or LTPA; 0. light level of both occupational and LTPA. BMI: 1. ≥25 kg/mw; 0. <25 kg/m <sup>2</sup> . Diet (vegetable consumption): 1. ≥3 times/w; 0. ≤2 times/w. | 8         |
| Zhang-2013 <sup>‡, 185</sup> | Kailuan Study                                                        | China   | 2006-2010 (4.00)                    | 79.42   | 18-98 (51.52) | Asian predominant          | >6.99                                   | general population | 91698       | Stroke cases (fatal and nonfatal strokes)                                                                                                                                | Smoking: 1. never smokers; 0. ever smokers.                                                                                                                                                                                                                                                                                   | 7         |

| Author-year              | Cohort                                                    | Country | Follow-up duration (mean or median) | Men (%) | Age (mean)    | Ethnicity (%)* | Proportion of high school graduates (%) | Health status      | Sample size | Outcome attainment                                                                                                                                                               | Definition of healthy lifestyle                                                                                                                                                                                                                                                                                                                                                                                                                                                                  | NOS score |
|--------------------------|-----------------------------------------------------------|---------|-------------------------------------|---------|---------------|----------------|-----------------------------------------|--------------------|-------------|----------------------------------------------------------------------------------------------------------------------------------------------------------------------------------|--------------------------------------------------------------------------------------------------------------------------------------------------------------------------------------------------------------------------------------------------------------------------------------------------------------------------------------------------------------------------------------------------------------------------------------------------------------------------------------------------|-----------|
|                          |                                                           |         |                                     |         |               |                |                                         |                    |             | were diagnosed according to WHO criteria combined with a brain CT or MR) were identified through active follow-up, discharge summaries, medical records, and death certificates. | PA (MVPA): 1. >80 min/w; 0. ≤80 min/w.<br>BMI: 1. <25 kg/m <sup>2</sup> ; 0. ≥25 kg/m <sup>2</sup> .<br>Diet (salt, 24-hour dietary salt intake): 1. <6 g/d; 0. ≥6 g/d.<br>SBP/DBP: 1. <120 and 80 mmHg (without medication); 0. ≥120 or 80 mmHg, or <120 and 80 mmHg (with medicine).<br>FBG: 1. <100 mg/dl (without medication); 0. ≥100 mg/dl or <100 mg/dl (with medication).<br>TC: 1. <200 mg/dl (without medication); 0. ≥200 mg/dl (without medication) or <200 mg/dl (with medication). |           |
| Zhou-2018 <sup>152</sup> | The People's Republic of China-USA Collaborative Study of | China   | 1983-2005 (20.30)                   | 49.57   | 35-59 (45.80) | Asian 100      | NA                                      | general population | 938         | CVD cases were defined as MI, CHD, sudden cardiac death, fatal or nonfatal stroke, and were identified through death certificates or hospital records                            | Smoking: 1. never smokers; 0. ever smokers.<br>PA: 1. took part in physical exercises regularly; 0. not took part in physical exercises regularly.<br>BMI: 1. <24 kg/m <sup>2</sup> ; 0. ≥24 kg/m <sup>2</sup> .<br>Diet (AHA, 24-h dietary recall): 1. 4-5 components; 0. 0-3 components.<br>SBP/DBP: 1. <120/80 mmHg                                                                                                                                                                           | 8         |

| Author-year                   | Cohort                                           | Country | Follow-up duration (mean or median) | Men (%) | Age (mean)    | Ethnicity (%) <sup>*</sup> | Proportion of high school graduates (%) | Health status      | Sample size | Outcome attainment                                                | Definition of healthy lifestyle                                                                                                                                                                                                                                                                                                                          | NOS score |
|-------------------------------|--------------------------------------------------|---------|-------------------------------------|---------|---------------|----------------------------|-----------------------------------------|--------------------|-------------|-------------------------------------------------------------------|----------------------------------------------------------------------------------------------------------------------------------------------------------------------------------------------------------------------------------------------------------------------------------------------------------------------------------------------------------|-----------|
|                               | Cardiovascular and Coronary Epidemiology         |         |                                     |         |               |                            |                                         |                    |             | obtained from next-of-kin or local death registration department. | (untreated); 0. <120/80 mmHg (treated) or ≥120/80 mmHg.<br>FBG: 1. <100 mg/dl (untreated); 0. <100 mg/dl (treated) or ≥100 mg/dl.<br>TC: 1. <200 mg/dl (untreated); 0. <200 mg/dl (treated) or ≥200 mg/dl.                                                                                                                                               |           |
| <b>Incident Heart Failure</b> |                                                  |         |                                     |         |               |                            |                                         |                    |             |                                                                   |                                                                                                                                                                                                                                                                                                                                                          |           |
| Agha-2014 <sup>186</sup>      | Women's Health Initiative Observational Study    | US      | 1993-1998 (11.00)                   | 0       | 50-79 (63.50) | White 88.38<br>Black 7.37  | 95.38                                   | general population | 84537       | Hospital HF cases were identified through medical record.         | Smoking: 1. not current smokers; 0. current smokers.<br>PA: 1. MPA ≥150 min/w or VPA ≥75 min/w; 0. MPA <150 min/w and VPA <75 min/w.<br>BMI: 1. 18.5-24.9; 0. ≥25.<br>Diet (AHEI, FFQ): 1. top 20%; 0. lower 80%.                                                                                                                                        | 8         |
| Atkins-2018 <sup>77</sup>     | Clinical Practice Research Datalink & UK Biobank | UK      | 2000-2016 (6.25)                    | 48.83   | 60-69 (63.55) | White predominant          | NA                                      | general population | 421411      | The methods of identifying HF cases were not reported.            | Clinical Practice Research Datalink:<br>Smoking: 2. never smokers; 1. former smokers; 0. current smokers.<br>PA: 2. vigorous activity; 1. moderate activity; 0. none or mild activity.<br>BMI: 2. <25 kg/ m <sup>2</sup> ; 1. 25-29.99 kg/ m <sup>2</sup> ; 0. ≥30 kg/ m <sup>2</sup> .<br>SBP/DBP: 2. <120 and 80 mmHg (untreated); 1. 120-139 or 80-89 | 7         |

| Author-year | Cohort | Country | Follow-up duration (mean or median) | Men (%) | Age (mean) | Ethnicity (%) <sup>*</sup> | Proportion of high school graduates (%) | Health status | Sample size | Outcome attainment | Definition of healthy lifestyle                                                                                                                                                                                                                                                                                                                                                                                                                                                                                                                                                                                                                                                                                                                                                                                                                                                                                                                       | NOS score |
|-------------|--------|---------|-------------------------------------|---------|------------|----------------------------|-----------------------------------------|---------------|-------------|--------------------|-------------------------------------------------------------------------------------------------------------------------------------------------------------------------------------------------------------------------------------------------------------------------------------------------------------------------------------------------------------------------------------------------------------------------------------------------------------------------------------------------------------------------------------------------------------------------------------------------------------------------------------------------------------------------------------------------------------------------------------------------------------------------------------------------------------------------------------------------------------------------------------------------------------------------------------------------------|-----------|
|             |        |         |                                     |         |            |                            |                                         |               |             |                    | <p>mmHg or &lt;120 and 80 mmHg (treated); 0. <math>\geq</math>140 or 90 mmHg.</p> <p>FSG: 2. &lt;5.6 mmol/l (not treated) or no data on FSG or diabetes; 1. 5.6-7 mmol/l (not treated) or &lt;5.6 mmol/l (treated), or diabetes diagnosis and not treated or with no treatment information; 0. &gt;7 mmol/l or diabetes diagnosis and treated.</p> <p>TC: 2. &lt;5.172 mmol/l (not treated) or no data on TG; 1. 5.172-6.21 mmol/l (not treated), or &lt;5.172 mmol/l (treated), or hypercholesterolemia diagnosis and not treated or with no treatment information; 0. &gt;6.21 mmol/l, or hypercholesterolemia diagnosis and treated.</p> <p>UK Biobank:</p> <p>Smoking: 2. never or quitting &gt;12 m; 1. quitting <math>\leq</math>12 m; 0. current.</p> <p>PA: 2. MPA <math>\geq</math>150 min/w, or VPA <math>\geq</math>75 min/w, or MVPA <math>\geq</math>150 min/w; 1. MPA 1-149 min/w, or VPA 1-74 min/w, or MVPA 1-149 min/w; 0. none.</p> |           |

| Author-year                   | Cohort                      | Country | Follow-up duration (mean or median) | Men (%) | Age (mean)    | Ethnicity (%) <sup>*</sup> | Proportion of high school graduates (%) | Health status      | Sample size | Outcome attainment                                                                                | Definition of healthy lifestyle                                                                                                                                                                                                                                                                                                                                                                                                                                                                                                                                                                                                                                     | NOS score |
|-------------------------------|-----------------------------|---------|-------------------------------------|---------|---------------|----------------------------|-----------------------------------------|--------------------|-------------|---------------------------------------------------------------------------------------------------|---------------------------------------------------------------------------------------------------------------------------------------------------------------------------------------------------------------------------------------------------------------------------------------------------------------------------------------------------------------------------------------------------------------------------------------------------------------------------------------------------------------------------------------------------------------------------------------------------------------------------------------------------------------------|-----------|
|                               |                             |         |                                     |         |               |                            |                                         |                    |             |                                                                                                   | BMI: 2. <25 kg/ m <sup>2</sup> ; 1. 25-29.99 kg/ m <sup>2</sup> ; 0. ≥30 kg/ m <sup>2</sup> .<br>SBP/DBP: 2. <120 and 80 mmHg (untreated); 1. 120-139 or 80-89 mmHg or <120 and 80 mmHg (treated); 0. ≥140 or 90 mmHg.<br>FSG: 2. no self-reported prevalent diabetes and no insulin medication; 1. self-reported prevalent diabetes but no insulin medication; 0. self-reported prevalent diabetes and insulin medication.<br>TC: 2. no self-reported prevalent high cholesterol and no cholesterol medication; 1. self-reported prevalent high cholesterol but no cholesterol medication; 0. self-reported prevalent high cholesterol and cholesterol medication. |           |
| Del Gobbo-2015 <sup>187</sup> | Cardiovascular Health Study | US      | 1989-NA (21.50)                     | 39.00   | 65-NA (72.00) | White 89.00<br>Black 11.00 | 72.91                                   | general population | 4490        | Incident HF cases were identified through annual clinic examinations and telephone inquiries, and | Smoking: 1. not current smokers; 0. current smokers.<br>Alcohol drinking: 1. ≥1 drink/w; 0. <1 drink/w.<br>PA: 1. LTPA ≥850 kcal/w; 0. LTPA <850 kcal/w.                                                                                                                                                                                                                                                                                                                                                                                                                                                                                                            | 9         |

| Author-year              | Cohort                                    | Country | Follow-up duration (mean or median) | Men (%) | Age (mean)    | Ethnicity (%) <sup>*</sup> | Proportion of high school graduates (%) | Health status      | Sample size | Outcome attainment                                                                                                                                                                                                                                                                                    | Definition of healthy lifestyle                                                                                                                                             | NOS score |
|--------------------------|-------------------------------------------|---------|-------------------------------------|---------|---------------|----------------------------|-----------------------------------------|--------------------|-------------|-------------------------------------------------------------------------------------------------------------------------------------------------------------------------------------------------------------------------------------------------------------------------------------------------------|-----------------------------------------------------------------------------------------------------------------------------------------------------------------------------|-----------|
|                          |                                           |         |                                     |         |               |                            |                                         |                    |             | adjudicated by medical records, diagnostic tests, clinical consultations, and interview. Confirmation of HF required diagnosis by a treating physician, HF symptoms plus signs or supportive findings on echocardiography, contrast ventriculography or chest radiograph, and medical therapy for HF. | BMI: 1. <30 kg/m <sup>2</sup> ; 0. ≥30 kg/m <sup>2</sup> . walking pace: 1. ≥2 mph; 0. <2 mph.                                                                              |           |
| Folsom-2015 <sup>2</sup> | Atherosclerosis Risk in Communities Study | US      | 1987-2011 (22.50)                   | 45.40   | 45-64 (54.10) | White 75.72<br>Black 24.28 | 80.00                                   | general population | 13462       | HF (ICD-9, 428.0-428.9; ICD-10, I50) including hospitalization or death were identified through                                                                                                                                                                                                       | Smoking: 2. Never or quitting >12 months; 1. quitting <12 months; 0. current.<br>PA: 2. MPA/MVPA >150 min/w or VPA >75 min/w; 1. MPA/MVPA 1-149 min/w or VPA 1-74 min/w; 0. | 9         |



| Author-year                     | Cohort                                             | Country | Follow-up duration (mean or median) | Men (%) | Age (mean)    | Ethnicity (%)*    | Proportion of high school graduates (%) | Health status      | Sample size | Outcome attainment                                                                                                                                | Definition of healthy lifestyle                                                                                                                                                                                                                                                                                                                                                                                                                                                                                                                            | NOS score |
|---------------------------------|----------------------------------------------------|---------|-------------------------------------|---------|---------------|-------------------|-----------------------------------------|--------------------|-------------|---------------------------------------------------------------------------------------------------------------------------------------------------|------------------------------------------------------------------------------------------------------------------------------------------------------------------------------------------------------------------------------------------------------------------------------------------------------------------------------------------------------------------------------------------------------------------------------------------------------------------------------------------------------------------------------------------------------------|-----------|
|                                 |                                                    |         |                                     |         |               |                   |                                         |                    |             | contact with participants and ascertained by discharge lists and death certificates.                                                              | <p>none PA.</p> <p>BMI: 2. &lt;25 kg/m<sup>2</sup>; 1. 25-29.99 kg/m<sup>2</sup>; 0. ≥30 kg/m<sup>2</sup>.</p> <p>Diet (AHA, FFQ): 2. 4-5 components; 1. 2-3 components; 0. 0-1 components.</p> <p>SBP/DBP: 2. &lt;120/80 mmHg without medication; 1. 120-139/80-89 mmHg or treated to &lt;120/80 mmHg; 0. ≥140/90 mmHg.</p> <p>FSG: 2. &lt;100 mg/dl without medication; 1. 100-125 mg/dl or treated to &lt;100 mg/dl; 0. ≥126 mg/dl.</p> <p>TC: 2. &lt;200 mg/dl without medication; 1. 200-239 mg/dl or treated to &lt;200 mg/dl; 0. &gt;240 mg/dl.</p> |           |
| Larsson-2016 (1) <sup>188</sup> | Cohort of Swedish Men & Swedish Mammography Cohort | Sweden  | 1997-2010 (12.10)                   | 52.51   | 45-79 (60.06) | White predominant | >18.00                                  | general population | 64679       | HF cases (ICD-10, I50, and I11.0) were ascertained by linkage with the Swedish National Patient Register and the Swedish Cause of Death Register. | <p>Smoking: 1. not current smokers; 0. current smokers.</p> <p>PA: 1. ≥150 min/w; 0. &lt;150 min/w.</p> <p>BMI: 1. 18.5-25 kg/m<sup>2</sup>; 0. &gt;25 kg/m<sup>2</sup>.</p> <p>Diet (mMDS, FFQ): 1. 4-8 points; 0. 0-3 points.</p>                                                                                                                                                                                                                                                                                                                        | 8         |

| Author-year                    | Cohort                      | Country | Follow-up duration (mean or median) | Men (%) | Age (mean)    | Ethnicity (%)*                            | Proportion of high school graduates (%) | Health status      | Sample size | Outcome attainment                                | Definition of healthy lifestyle                                                                                                                                                                                                                                                                                                                                                                                                                                                                                                                                                                                                                                                                                 | NOS score |
|--------------------------------|-----------------------------|---------|-------------------------------------|---------|---------------|-------------------------------------------|-----------------------------------------|--------------------|-------------|---------------------------------------------------|-----------------------------------------------------------------------------------------------------------------------------------------------------------------------------------------------------------------------------------------------------------------------------------------------------------------------------------------------------------------------------------------------------------------------------------------------------------------------------------------------------------------------------------------------------------------------------------------------------------------------------------------------------------------------------------------------------------------|-----------|
| Nayor-2016 <sup>189</sup>      | Framingham Offspring cohort | US      | 1995-2011 (12.30)                   | 47.00   | NA (59.00)    | White predominant                         | 96.00                                   | general population | 3201        | HF cases were identified through medical records. | Smoking: 2. never smokers or quitting >12 m; 1. quitting ≤12 m; 0. current smokers.<br>PA (physical activity index): 2. top quartile; 1. second quartile; 0. lower two quartiles.<br>BMI: 2. <25 kg/m <sup>2</sup> ; 1. 25-29.9 kg/m <sup>2</sup> ; 0. ≥30 kg/m <sup>2</sup> .<br>Diet (AHA, FFQ): 2. 2-5 components; 1. one component; 0. zero component.<br>SBP/DBP: 2. <120 and 80 mmHg (untreated); 1. 120-139 or 80-89 mmHg (untreated) or <120 and 80 mmHg (treated); 0. ≥140 or 90 mmHg.<br>FPG: 2. <100 mg/dl (untreated); 1. 100-125 mg/dl (untreated) or <100 mg/dl (treated); 0. ≥126 mg/dl.<br>TC: 2. <200 mg/dl (untreated); 1. 200-239 mg/dl (untreated) or <200 mg/dl (treated); 0. ≥ 240 mg/dl. | 8         |
| Ogunmoroti-2017 <sup>190</sup> | Multi-Ethnic Study of       | US      | 2000-NA (12.20)                     | 47.00   | 45-84 (62.00) | White 61.00<br>Black 28.00<br>Asian 11.00 | 82.30                                   | general population | 6506        | HF cases were reported by participants and        | Smoking: 1. never smokers and former smokers quitting >12 m; 0. former smokers quitting ≤12 m and                                                                                                                                                                                                                                                                                                                                                                                                                                                                                                                                                                                                               | 8         |

| Author-year                    | Cohort              | Country | Follow-up duration (mean or median) | Men (%) | Age (mean)        | Ethnicity (%)* | Proportion of high school graduates (%) | Health status      | Sample size | Outcome attainment                                                                                                                                                                    | Definition of healthy lifestyle                                                                                                                                                                                                                                                                                                                                                                                                                                                                     | NOS score |
|--------------------------------|---------------------|---------|-------------------------------------|---------|-------------------|----------------|-----------------------------------------|--------------------|-------------|---------------------------------------------------------------------------------------------------------------------------------------------------------------------------------------|-----------------------------------------------------------------------------------------------------------------------------------------------------------------------------------------------------------------------------------------------------------------------------------------------------------------------------------------------------------------------------------------------------------------------------------------------------------------------------------------------------|-----------|
|                                | Atherosclerosis     |         |                                     |         |                   |                |                                         |                    |             | verified from death certificates, medical records for all hospitalizations, and outpatient diagnoses.                                                                                 | current smokers.<br>PA: 1. MPA $\geq$ 150 min/w or MVPA $\geq$ 75 min/w; 0. MPA <150 min/w or VPA <75 min/w.<br>BMI: 1. <25 kg/m <sup>2</sup> ; 0. $\geq$ 25 kg/m <sup>2</sup> .<br>Diet (AHA, FFQ): 1. 4-5 components; 0. 0-3 components.<br>SBP/DBP: 1. <120/80 mmHg (untreated); 0. <120/80 mmHg (treated) or $\geq$ 120/80 mmHg.<br>FBG: 1. <100 mg/dl (untreated); 0. <100 mg/dl (treated) or $\geq$ 100 mg/dl.<br>TC: 1. <200 mg/dl (untreated); 0. <200 mg/dl (treated) or $\geq$ 200 mg/dl. |           |
| Spahillari-2017 <sup>191</sup> | Jackson Heart Study | US      | 2000-2012 (9.90)                    | 35.00   | 38.8-66.3 (54.40) | Black 100      | 62.74                                   | general population | 3585        | HF hospitalizations (ICD-9, 428; ICD-10, I50) were identified through annual follow-up telephone interviews and compared with annual hospital discharge lists and death certificates. | Smoking: 1. never smokers or quitting $\geq$ 12 m; 0. current smokers or quitting <12 m.<br>PA: 1. MPA $\geq$ 150 min/w, or VPA $\geq$ 75 min/w, or MVPA $\geq$ 150 min/w; 0. MPA <150 min/w, and VPA <75 min/w, and MVPA <150 min/w.<br>BMI: 1. <25 kg/m <sup>2</sup> ; 0. $\geq$ 25 kg/m <sup>2</sup> .<br>Diet (AHA, FFQ): 1. 4-5 healthy components; 0. 0-3 healthy components.                                                                                                                 | 8         |

| Author-year                      | Cohort               | Country | Follow-up duration (mean or median) | Men (%) | Age (mean)    | Ethnicity (%)*    | Proportion of high school graduates (%) | Health status      | Sample size | Outcome attainment                                                                                                                                                                                                                | Definition of healthy lifestyle                                                                                                                                                                                                                                                                                                                                                                                                                                                      | NOS score |
|----------------------------------|----------------------|---------|-------------------------------------|---------|---------------|-------------------|-----------------------------------------|--------------------|-------------|-----------------------------------------------------------------------------------------------------------------------------------------------------------------------------------------------------------------------------------|--------------------------------------------------------------------------------------------------------------------------------------------------------------------------------------------------------------------------------------------------------------------------------------------------------------------------------------------------------------------------------------------------------------------------------------------------------------------------------------|-----------|
| Wang-2011 <sup>192</sup>         | FINRIS K Study       | Finland | 1982-2007 (14.10)                   | 48.18   | 25-74 (NA)    | White predominant | <87.78                                  | general population | 38075       | HF cases (ICD-8, 427.00 and 427.10; ICD-9, 428, 4029B and 4148A-X; ICD-10, I50, I11.0, I13.0 and I13.2) were identified through the Finnish Hospital Discharge Register and the National Social Insurance Institution's Register. | SBP/DBP: 1. <120 and 80 mmHg (untreated); 0. ≥120 or 80 mmHg, or <120 and 80 mmHg (treated).<br>FPG/HbA1c: 1. <100 mg/dl or <5.7%; 0. ≥ 100 mg/dL and ≥5.7%, or <100 mg/dl or <5.7% (treated).<br>TC: 1. <200 mg/dl; 0. ≥200 mg/dl or <200 mg/dl (treated).<br>Smoking: 1. not current smokers; 0. current smokers.<br>PA: 1. moderate or high; 0. low.<br>BMI: 1. <25 kg/m <sup>2</sup> ; 0. ≥25 kg/m <sup>2</sup> .<br>Diet (vegetable consumption): 1. ≥3 times/w; 0. ≤2 times/w. | 9         |
| Incident AF                      |                      |         |                                     |         |               |                   |                                         |                    |             |                                                                                                                                                                                                                                   |                                                                                                                                                                                                                                                                                                                                                                                                                                                                                      |           |
| Di Benedetto-2018 <sup>193</sup> | European Prospective | UK      | 1993-2015 (17.10)                   | 45.18   | 39-79 (58.53) | White 99.50       | 53.38                                   | General population | 21499       | AF (ICD-10, I48) was obtained through routine                                                                                                                                                                                     | Smoking: 1. not current smokers; 0. current smokers.<br>Alcohol drinking: 1. <14 units/w; 0.                                                                                                                                                                                                                                                                                                                                                                                         | 7         |

| Author-year                      | Cohort                                                                                              | Country | Follow-up duration (mean or median) | Men (%) | Age (mean)    | Ethnicity (%)*    | Proportion of high school graduates (%) | Health status        | Sample size | Outcome attainment                                                                                                                                                                                           | Definition of healthy lifestyle                                                                                                                                                                                                                                                                                                          | NOS score |
|----------------------------------|-----------------------------------------------------------------------------------------------------|---------|-------------------------------------|---------|---------------|-------------------|-----------------------------------------|----------------------|-------------|--------------------------------------------------------------------------------------------------------------------------------------------------------------------------------------------------------------|------------------------------------------------------------------------------------------------------------------------------------------------------------------------------------------------------------------------------------------------------------------------------------------------------------------------------------------|-----------|
| Larsson-2016 (2) <sup>194</sup>  | Investigation into Cancer and Nutrition -Norfolk Cohort of Swedish Men & Swedish Mammography Cohort | Sweden  | 1998-2009 (10.90)                   | 54.29   | 45-79 (60.46) | White predominant | 17.00                                   | General population   | 72390       | AF (ICD-10 code I48) was obtained through the linkage of study participants, using the unique personal identification number assigned to each Swedish citizen, with the Swedish National Inpatient Register. | annual record linkage to National Health Service hospital information systems.<br>Smoking: 1. not current smokers; 0. current smokers.<br>Alcohol drinking (M/F): 1. ≤2/1 drinks/d; 0. >2/1 drinks/d.<br>PA: 1. regular exercise for ≥20 min/d; 0. exercise for <20 min/d.<br>BMI: 1. <25 kg/m <sup>2</sup> ; 0. ≥25 kg/m <sup>2</sup> . | 8         |
| Incident PAD                     |                                                                                                     |         |                                     |         |               |                   |                                         |                      |             |                                                                                                                                                                                                              |                                                                                                                                                                                                                                                                                                                                          |           |
| Lopez-Laguna-2018 <sup>195</sup> | PREvención con DIeta MEDiter                                                                        | Spain   | 2003-NA (4.80)                      | 42.50   | 55-80 (67.08) | White predominant | 22.21                                   | High-risk population | 7122        | PAD cases were obtained by medical records and confirmed by at                                                                                                                                               | Smoking: 1. not current smokers; 0. current smokers.<br>Alcohol drinking (M/F): 1. 10-50/5-25 g/d; 0. <10/5 or >50/25 g/d.                                                                                                                                                                                                               | 8         |

| Author-year                | Cohort                                | Country | Follow-up duration (mean or median) | Men (%) | Age (mean)    | Ethnicity (%) <sup>*</sup>                | Proportion of high school graduates (%) | Health status      | Sample size | Outcome attainment                                                                                                                                                                                           | Definition of healthy lifestyle                                                                                                                                                                                                                                                                                                                                                                                                                                                                        | NOS score |
|----------------------------|---------------------------------------|---------|-------------------------------------|---------|---------------|-------------------------------------------|-----------------------------------------|--------------------|-------------|--------------------------------------------------------------------------------------------------------------------------------------------------------------------------------------------------------------|--------------------------------------------------------------------------------------------------------------------------------------------------------------------------------------------------------------------------------------------------------------------------------------------------------------------------------------------------------------------------------------------------------------------------------------------------------------------------------------------------------|-----------|
|                            | ránea trial                           |         |                                     |         |               |                                           |                                         |                    |             | least one of the following criteria: an ankle-brachial index lower than 0.9 at rest, clinical evidence of arterial occlusive disease, or an endovascular or open surgical revascularization (or amputation). | PA: 1. $\geq 500$ METs-min/w; 0. $< 500$ METs-min/w.<br>BMI: 1. $< 25$ kg/m <sup>2</sup> ; 0. $\geq 25$ kg/m <sup>2</sup> .<br>Diet (MDS, FFQ): 1. $\geq 9$ points; 0. $< 9$ points.                                                                                                                                                                                                                                                                                                                   |           |
| Unkart-2019 <sup>196</sup> | Multi-Ethnic Study of Atherosclerosis | US      | 2000-2012 (9.20)                    | 47.35   | 44-84 (61.32) | White 61.87<br>Black 25.57<br>Asian 12.55 | $> 66.12$                               | General population | 5529        | PAD was defined as an ankle-brachial index $\leq 0.9$ .                                                                                                                                                      | Smoking: 2. never smokers and former smokers quitting $> 12$ m; 1. former smokers quitting $\leq 12$ m; 0. current smokers.<br>PA: 2. MPA $\geq 150$ min/w or VPA $\geq 75$ min/w; 1. MPA 1-149 min/w or VPA 1-74 min/w; 0. no exercise.<br>BMI: 2. $< 25.00$ kg/m <sup>2</sup> ; 1. 25.00-29.99 kg/m <sup>2</sup> ; 0. $\geq 30.00$ kg/m <sup>2</sup> .<br>Diet (AHA, FFQ): 2. 4-5 components; 1. 2-3 components; 0. 0-1 component.<br>SBP/DBP: 2. $< 120/80$ mmHg (untreated); 1. 120-139/80-89 mmHg | 7         |

| Author-year                  | Cohort                                                               | Country | Follow-up duration (mean or median) | Men (%) | Age (mean)    | Ethnicity (%)*    | Proportion of high school graduates (%) | Health status      | Sample size | Outcome attainment                                                                                          | Definition of healthy lifestyle                                                                                                                                                                                                                                                                                                                        | NOS score |
|------------------------------|----------------------------------------------------------------------|---------|-------------------------------------|---------|---------------|-------------------|-----------------------------------------|--------------------|-------------|-------------------------------------------------------------------------------------------------------------|--------------------------------------------------------------------------------------------------------------------------------------------------------------------------------------------------------------------------------------------------------------------------------------------------------------------------------------------------------|-----------|
|                              |                                                                      |         |                                     |         |               |                   |                                         |                    |             |                                                                                                             | or <120/80 mmHg (treated); 0. $\geq$ 140/90 mmHg.<br>FBG: 2. <100 mg/dl (untreated); 1. 100-125 mg/dl or <100 mg/dl (treated); 0. $\geq$ 126 mg/dl.<br>TC: 2. <200 mg/dl (untreated); 1. 200-239 mg/dl or <200 mg/dl (treated); 0. $\geq$ 240 mg/dl.                                                                                                   |           |
| <b>Incident Hypertension</b> |                                                                      |         |                                     |         |               |                   |                                         |                    |             |                                                                                                             |                                                                                                                                                                                                                                                                                                                                                        |           |
| Andriolo-2019 <sup>197</sup> | European Prospective Investigation into Cancer and Nutrition-Potsdam | Germany | 1994-NA (10.30)                     | 32.01   | 36-65 (47.38) | White predominant | 62.40                                   | General population | 11923       | Incident hypertension was self-reported and verified and confirmed by the treating physician (ICD-10: I10). | Smoking: 1. never smoking; 0. current and former smoking.<br>PA (Improved Physical Activity Index): 1. moderately active and active/very active; 0. inactive.<br>BMI: 1. $\leq$ 25 kg/m <sup>2</sup> ; 0. >25 kg/m <sup>2</sup> ;<br>WC (M/F): 1. $\leq$ 102/88 cm; 0. >102/88 cm.<br>Diet (modified DASH, FFQ): 1. top 2 tertiles; 0. lowest tertile. | 9         |

| Author-year                  | Cohort                             | Country | Follow-up duration (mean or median) | Men (%) | Age (mean)    | Ethnicity (%) <sup>*</sup> | Proportion of high school graduates (%) | Health status      | Sample size | Outcome attainment                                                                                                         | Definition of healthy lifestyle                                                                                                                                                                                                                                                                                                                                                              | NOS score      |
|------------------------------|------------------------------------|---------|-------------------------------------|---------|---------------|----------------------------|-----------------------------------------|--------------------|-------------|----------------------------------------------------------------------------------------------------------------------------|----------------------------------------------------------------------------------------------------------------------------------------------------------------------------------------------------------------------------------------------------------------------------------------------------------------------------------------------------------------------------------------------|----------------|
| Banda-2010 <sup>198</sup>    | Aerobics Center Longitudinal Study | US      | 1974-2004 (10.70)                   | 100     | 20-82 (44.00) | White predominant          | Predominant                             | general population | 14568       | Hypertension was identified through questionnaires by asking whether a physician had ever told them they had hypertension. | Smoking: 1. not current smokers; 0. current smokers.<br>Alcohol drinking: 1. 1-14 drinks/w; 0. zero or >14 drinks/w.<br>PA: 1. report any activities in the prior three months; 0. report no activities in the prior three months.<br>BMI: 1. 18.5-24.9 kg/m <sup>2</sup> ; 0. ≥25.0 kg/m <sup>2</sup> .<br>Physically fit (CRF): 1. upper two tertiles; 0. the lowest tertile.              | 8              |
| Chomistek-2015 <sup>49</sup> | Nurses' Health Study II            | US      | 1991-2011 (NA)                      | 0       | 27-44 (37.10) | White predominant          | Predominant                             | general population | 88940       | Hypertension cases were self-reported from biennial questionnaires.                                                        | Smoking: 1. not current smokers; 0. current smokers.<br>Alcohol drinking: 1. 0.1-14.9 g/d; 0. none or ≥15 g/d.<br>PA: 1. MVPA ≥2.5 h/w; 0. MVPA <2.5 h/w.<br>Sedentary behavior (watching television): 1. ≤7 h/w; 0. >7 h/w.<br>BMI: 1. 18.5-24.9 kg/m <sup>2</sup> ; 0. <18.5 kg/m <sup>2</sup> or ≥25 kg/m <sup>2</sup> .<br>Diet (AHEI-2010, FFQ): 1. top 40% (≥47 points); 0. lower 60%. | 7 <sup>†</sup> |
| Díaz Gutiérrez-              | <i>Seguimiento</i>                 | Spain   | 1999-2014 (10.20)                   | 32.99   | 19-91 (35.27) | White predominant          | 100                                     | General population | 14057       | Hypertension was self-reported, which                                                                                      | Smoking: 1. never smokers; 0. current or former smokers.                                                                                                                                                                                                                                                                                                                                     |                |



| Author-year                | Cohort                               | Country   | Follow-up duration (mean or median) | Men (%) | Age (mean)    | Ethnicity (%) <sup>*</sup> | Proportion of high school graduates (%) | Health status      | Sample size | Outcome attainment                               | Definition of healthy lifestyle                                                                                                                                                                                                                                                                                                                                                                                                            | NOS score |
|----------------------------|--------------------------------------|-----------|-------------------------------------|---------|---------------|----------------------------|-----------------------------------------|--------------------|-------------|--------------------------------------------------|--------------------------------------------------------------------------------------------------------------------------------------------------------------------------------------------------------------------------------------------------------------------------------------------------------------------------------------------------------------------------------------------------------------------------------------------|-----------|
| 2019 <sup>199</sup>        | <i>Universidad de Navarra</i> Cohort |           |                                     |         |               |                            |                                         |                    |             | was validated by a subsample of the cohort.      | Alcohol drinking (M/F): 1. 0.1-10/5 g/d; 0. abstainer or >10/5 g/d.<br>Binge drinking (≤5 alcoholic drinks on any occasion): 1. never; 0. ever.<br>PA: 1. >20 METs-h/w; 0. ≤20 METs-h/w.<br>BMI: 1. ≤22 kg/m <sup>2</sup> ; 0. >22 kg/m <sup>2</sup> .<br>Diet (MDS, FFQ): 1. ≥4 points; 0. <4 points.                                                                                                                                     |           |
| Nguyen-2019 <sup>200</sup> | 45 and Up Study                      | Australia | 2006-NA (2.70)                      | 42.03   | 45-NA (58.30) | White predominant          | 74.00                                   | General population | 32393       | Hypertension was self-reported.                  | Smoking: 1. not current smokers; 0. current smokers.<br>Alcohol drinking: 1. ≤14 drinks/w; 0. >14 drinks/d.<br>PA: 1. MVPA ≥150 min/w; 0. MVPA <150 min/w.<br>BMI: 1. <25 kg/m <sup>2</sup> ; 0. ≥25 kg/m <sup>2</sup> .<br>Diet (questionnaire): 1. ≥2 serves fruit and/or ≥3 serves vegetables per day; 0. <2 serves fruit and <3 serves vegetables per day.<br>Psychological distress (Kessler-10 scale): 1. <22 points; 0. ≥22 points. | 5         |
| Zhang-2014 <sup>54</sup>   | Kailuan Study                        | China     | 2006-2011 (3.63)                    | 75.27   | NA (47.20)    | Asian predominant          | >9.64                                   | general population | 46147       | Hypertension cases were diagnosed if the SBP/DBP | Smoking: 1. never smokers; 0. ever smokers.<br>PA: 1. ≥3 episodes/w and ≥30                                                                                                                                                                                                                                                                                                                                                                | 7         |

| Author-year | Cohort | Country | Follow-up duration (mean or median) | Men (%) | Age (mean) | Ethnicity (%) <sup>*</sup> | Proportion of high school graduates (%) | Health status | Sample size | Outcome attainment                                                                                                                       | Definition of healthy lifestyle                                                                                                                                                                                                                                                                                                                                                                                                                                                                                   | NOS score |
|-------------|--------|---------|-------------------------------------|---------|------------|----------------------------|-----------------------------------------|---------------|-------------|------------------------------------------------------------------------------------------------------------------------------------------|-------------------------------------------------------------------------------------------------------------------------------------------------------------------------------------------------------------------------------------------------------------------------------------------------------------------------------------------------------------------------------------------------------------------------------------------------------------------------------------------------------------------|-----------|
|             |        |         |                                     |         |            |                            |                                         |               |             | ≥140/90 mmHg during physical examination, or participants reported hypertension was diagnosed and antihypertension medication was taken. | min/episode; 0. <3 episodes/w or <30 min/episode.<br>BMI: 1. <24 kg/m <sup>2</sup> ; 0. ≥24 kg/m <sup>2</sup> .<br>Diet (salt, 24-hour dietary salt intake): 1. <6 g/d; 0. ≥6 g/d.<br>SBP/DBP: 1. <120 and 80 mmHg (without medication); 0. ≥120 or 80 mmHg, or <120 and 80 mmHg (with medicine).<br>FPG: 1. <5.6 mmol/l (without medication); 0. ≥5.6 mmol/l or <5.6 mmol/l (with medication).<br>TC: 1. <5.2 mmol/l (without medication); 0. ≥5.2 mmol/l (without medication) or <5.2 mmol/l (with medication)。 |           |

<sup>\*</sup> The percentage of ethnic groups may not sum to 100% since some participants belonged to the other ethnic groups or did not report the information.

<sup>†</sup> Because of the attainments of coronary heart disease cases and hypertension cases were different, the NOS score for coronary heart disease was 8, whereas the NOS score for hypertension was 7.

<sup>‡</sup> The study was only used in stratified analysis.

%E, percentage of total energy intake; ACS, American Cancer Society; AHA, American Heart Association; AHEI, Alternative Healthy Eating Index; AICR, American Institute for Cancer Research; AF, atrial fibrillation; ASCVD, atherosclerotic cardiovascular disease; BMI, body mass index; CBVD, cerebrovascular disease; CHD, coronary heart disease; CRF, cardiorespiratory fitness; CVD, cardiovascular disease; DASH, Dietary Approaches to Stop Hypertension; DBP, diastolic blood pressure; DF, dietary fiber; DHA, docosahexaenoic acid; DM, diabetes mellitus; ECG, electrocardiogram; EPA, eicosapentaenoic acid; FA, fatty acid; FBG, fasting blood glucose; FFQ, food frequency questionnaire; FPG, fasting plasma glucose; FSG, fasting serum glucose; HbA1c, glycosylated hemoglobin; HF, heart failure; ICD, International Classification of Diseases; IHD, ischemic heart disease; LTPA, leisure-time physical activity; M/F, for male and female respectively; MDS, Mediterranean diet score; MET, metabolic equivalent of task; MI, myocardial infarction; mMDS, modified Mediterranean diet score; MPA, moderate physical activity; MVPA, moderate to

vigorous physical activity; NA, not available; NOS, Newcastle–Ottawa Scale; PA, physical activity; PAD, peripheral artery disease; PUFA, polyunsaturated fatty acid; SBP, systolic blood pressure; SFA, saturated fatty acid; SSB, sugar-sweetened beverage; TC, total cholesterol; UK, the United Kingdom; US, the United States; VPA, vigorous physical activity; WC, waist circumference; WCRF, World Cancer Research Fund; WHO, World Health Organization; WHR, waist-to-hip ratio.

**Table A8.** Risk of bias within studies evaluated by the Newcastle–Ottawa Scale

| Author-year                        | Selection of cohorts |      |    |    | Comparability of cohorts*  |               |               | Assessment of outcome |                   |                   | NOS score        |
|------------------------------------|----------------------|------|----|----|----------------------------|---------------|---------------|-----------------------|-------------------|-------------------|------------------|
|                                    | REC                  | SNEC | AE | NO | Demographic characteristic | Complications | Other factors | AO                    | FULE <sup>†</sup> | AFUC <sup>‡</sup> |                  |
| Agha-2014 <sup>186</sup>           | 1                    | 1    | 1  | 1  | Adjusted                   | Not adjusted  | Adjusted      | 1                     | 1                 | 0                 | 8                |
| Ahmed-2013 <sup>75</sup>           | 1                    | 1    | 1  | 1  | Adjusted                   | Adjusted      | Adjusted      | 1                     | 1                 | 1                 | 9                |
| Akesson-2007 <sup>173</sup>        | 1                    | 1    | 0  | 1  | Adjusted                   | Adjusted      | Adjusted      | 1                     | 1                 | 1                 | 8                |
| Akesson-2014 <sup>174</sup>        | 1                    | 1    | 1  | 1  | Adjusted                   | Not adjusted  | Adjusted      | 1                     | 1                 | 1                 | 9                |
| Andriolo-2019 <sup>197</sup>       | 1                    | 1    | 1  | 1  | Adjusted                   | Not adjusted  | Adjusted      | 1                     | 1                 | 1                 | 9                |
| Artero-2012 <sup>76</sup>          | 1                    | 1    | 1  | 1  | Adjusted                   | Not adjusted  | Adjusted      | 1                     | 1                 | 1                 | 9                |
| Atkins-2018 <sup>77</sup>          | 1                    | 1    | 1  | 1  | Adjusted                   | Not adjusted  | Adjusted      | 0                     | 1                 | 0                 | 7                |
| Banda-2010 <sup>198</sup>          | 1                    | 1    | 1  | 1  | Adjusted                   | Adjusted      | Adjusted      | 0                     | 1                 | 1                 | 8                |
| Behrens-2013 <sup>56</sup>         | 1                    | 1    | 0  | 1  | Adjusted                   | Not adjusted  | Adjusted      | 1                     | 1                 | 1                 | 8                |
| Berard-2017 <sup>78</sup>          | 1                    | 1    | 1  | 1  | Adjusted                   | Not adjusted  | Adjusted      | 1                     | 1                 | 1                 | 9                |
| Bonaccio-2019 <sup>79</sup>        | 1                    | 1    | 1  | 1  | Adjusted                   | Adjusted      | Adjusted      | 1                     | 1                 | 1                 | 9                |
| Booth-2014 <sup>80</sup>           | 1                    | 1    | 1  | 1  | Adjusted                   | Adjusted      | Adjusted      | 1                     | 0                 | 1                 | 8                |
| Booth-2016 <sup>81</sup>           | 1                    | 1    | 1  | 1  | Adjusted                   | Adjusted      | Adjusted      | 0                     | 1                 | 1                 | 8                |
| Breslow-1980 <sup>47</sup>         | 1                    | 1    | 0  | 1  | Adjusted                   | Not adjusted  | Not adjusted  | 0                     | 1                 | 1                 | 6                |
| Britton-2008 <sup>172</sup>        | 1                    | 1    | 1  | 1  | Adjusted                   | Not adjusted  | Not adjusted  | 1                     | 1                 | 1                 | 8                |
| Carlsson-2010 <sup>82</sup>        | 1                    | 1    | 1  | 1  | Adjusted                   | Not adjusted  | Not adjusted  | 1                     | 1                 | 1                 | 8                |
| Carlsson-2013 <sup>83</sup>        | 1                    | 1    | 1  | 1  | Adjusted                   | Not adjusted  | Adjusted      | 1                     | 1                 | 1                 | 9                |
| Cerhan-2004 <sup>84</sup>          | 1                    | 1    | 0  | 1  | Adjusted                   | Not adjusted  | Not adjusted  | 1                     | 1                 | 1                 | 7                |
| Chakravarty-<br>2012 <sup>85</sup> | 1                    | 1    | 0  | 1  | Adjusted                   | Adjusted      | Adjusted      | 1                     | 1                 | 1                 | 8                |
| Cheng-2018 <sup>86</sup>           | 1                    | 1    | 0  | 1  | Adjusted                   | Adjusted      | Adjusted      | 1                     | 1                 | 1                 | 8                |
| Chiuve-2006 <sup>175</sup>         | 1                    | 1    | 0  | 1  | Adjusted                   | Adjusted      | Adjusted      | 0                     | 1                 | 1                 | 7                |
| Chiuve-2008 <sup>179</sup>         | 1                    | 1    | 0  | 1  | Adjusted                   | Not adjusted  | Adjusted      | 0                     | 1                 | 1                 | 7                |
| Chiuve-2011 <sup>153</sup>         | 1                    | 1    | 0  | 1  | Adjusted                   | Adjusted      | Adjusted      | 1                     | 1                 | 1                 | 8                |
| Chomistek-2015 <sup>49</sup>       | 1                    | 1    | 0  | 1  | Adjusted                   | Adjusted      | Adjusted      | 1/0                   | 1                 | 1                 | 8/7 <sup>§</sup> |
| Cloud-2015 <sup>87</sup>           | 1                    | 1    | 0  | 1  | Adjusted                   | Not adjusted  | Not adjusted  | 1                     | 1                 | 1                 | 7                |

| Author-year                                 | Selection of cohorts |      |    |    | Comparability of cohorts*  |               |               | Assessment of outcome |                   |                   | NOS score |
|---------------------------------------------|----------------------|------|----|----|----------------------------|---------------|---------------|-----------------------|-------------------|-------------------|-----------|
|                                             | REC                  | SNEC | AE | NO | Demographic characteristic | Complications | Other factors | AO                    | FULE <sup>†</sup> | AFUC <sup>‡</sup> |           |
| Del Gobbo-2015 <sup>187</sup>               | 1                    | 1    | 1  | 1  | Adjusted                   | Not adjusted  | Adjusted      | 1                     | 1                 | 1                 | 9         |
| Di Benedetto-2018 <sup>193</sup>            | 1                    | 1    | 1  | 1  | Adjusted                   | Not adjusted  | Not adjusted  | 1                     | 1                 | 0                 | 7         |
| Diaz-2014 <sup>88</sup>                     | 1                    | 1    | 1  | 1  | Adjusted                   | Adjusted      | Adjusted      | 0                     | 0                 | 1                 | 7         |
| Díaz Gutiérrez-2017 <sup>164</sup>          | 1                    | 1    | 0  | 1  | Adjusted                   | Adjusted      | Adjusted      | 1                     | 1                 | 1                 | 8         |
| Díaz Gutiérrez-2019 <sup>199</sup>          | 1                    | 1    | 0  | 1  | Adjusted                   | Adjusted      | Adjusted      | 0                     | 1                 | 1                 | 7         |
| Ding-2015 <sup>89</sup>                     | 1                    | 1    | 1  | 1  | Adjusted                   | Not adjusted  | Adjusted      | 1                     | 1                 | 1                 | 9         |
| Dong-2012 <sup>90</sup>                     | 1                    | 1    | 1  | 1  | Adjusted                   | Not adjusted  | Not adjusted  | 1                     | 1                 | 1                 | 8         |
| Dunkler-2016 <sup>91</sup>                  | 1                    | 1    | 1  | 1  | Adjusted                   | Not adjusted  | Adjusted      | 0                     | 1                 | 1                 | 8         |
| Eguchi-2012 <sup>154</sup>                  | 1                    | 1    | 0  | 1  | Adjusted                   | Adjusted      | Adjusted      | 1                     | 1                 | 1                 | 8         |
| Eguchi-2014 <sup>155</sup>                  | 1                    | 1    | 1  | 1  | Adjusted                   | Adjusted      | Adjusted      | 1                     | 1                 | 1                 | 9         |
| Eguchi-2017 <sup>51</sup>                   | 1                    | 1    | 0  | 1  | Adjusted                   | Adjusted      | Adjusted      | 1                     | 1                 | 1                 | 8         |
| Emberson-2005 <sup>92</sup>                 | 1                    | 1    | 1  | 1  | Not adjusted               | Not adjusted  | Not adjusted  | 1                     | 1                 | 1                 | 7         |
| Eriksen-2015 <sup>156</sup>                 | 1                    | 1    | 1  | 1  | Adjusted                   | Adjusted      | Adjusted      | 0                     | 1                 | 0                 | 7         |
| Fazel-Tabar<br>Malekshah-2016 <sup>93</sup> | 1                    | 1    | 1  | 1  | Adjusted                   | Not adjusted  | Adjusted      | 0                     | 1                 | 1                 | 8         |
| Folsom-2011 <sup>165</sup>                  | 1                    | 1    | 1  | 1  | Adjusted                   | Not adjusted  | Not adjusted  | 1                     | 1                 | 1                 | 8         |
| Folsom-2015 <sup>2</sup>                    | 1                    | 1    | 1  | 1  | Adjusted                   | Adjusted      | Adjusted      | 1                     | 1                 | 1                 | 9         |
| Foraker-2016 <sup>166</sup>                 | 1                    | 1    | 1  | 1  | Adjusted                   | Not adjusted  | Adjusted      | 1                     | 1                 | 1                 | 9         |
| Ford-2009 <sup>69</sup>                     | 1                    | 1    | 1  | 1  | Adjusted                   | Not adjusted  | Not adjusted  | 1                     | 1                 | 1                 | 8         |
| Ford-2011 <sup>45</sup>                     | 1                    | 1    | 1  | 1  | Adjusted                   | Adjusted      | Not adjusted  | 1                     | 1                 | 0                 | 8         |
| Ford-2012 (1) <sup>94</sup>                 | 1                    | 1    | 1  | 1  | Adjusted                   | Adjusted      | Adjusted      | 1                     | 1                 | 0                 | 8         |
| Ford-2012 (2) <sup>95</sup>                 | 1                    | 1    | 1  | 1  | Adjusted                   | Adjusted      | Adjusted      | 1                     | 1                 | 0                 | 8         |
| Foster-2018 <sup>96</sup>                   | 1                    | 1    | 1  | 1  | Adjusted                   | Adjusted      | Adjusted      | 1                     | 1                 | 0                 | 8         |

| Author-year                        | Selection of cohorts |      |    |    | Comparability of cohorts*  |               |               | Assessment of outcome |                   |                   | NOS score |
|------------------------------------|----------------------|------|----|----|----------------------------|---------------|---------------|-----------------------|-------------------|-------------------|-----------|
|                                    | REC                  | SNEC | AE | NO | Demographic characteristic | Complications | Other factors | AO                    | FULE <sup>†</sup> | AFUC <sup>‡</sup> |           |
| Gopinath-2010 <sup>97</sup>        | 1                    | 1    | 1  | 1  | Adjusted                   | Adjusted      | Adjusted      | 1                     | 1                 | 0                 | 8         |
| Greenlee-2017 <sup>98</sup>        | 1                    | 1    | 01 | 1  | Adjusted                   | Adjusted      | Adjusted      | 0                     | 1                 | 1                 | 8         |
| Hamer-2011 <sup>99</sup>           | 1                    | 1    | 1  | 1  | Adjusted                   | Not adjusted  | Adjusted      | 1                     | 1                 | 0                 | 8         |
| Han-2018 <sup>157</sup>            | 1                    | 1    | 1  | 1  | Adjusted                   | Not adjusted  | Adjusted      | 1                     | 1                 | 1                 | 9         |
| Heitz-2017 <sup>100</sup>          | 1                    | 1    | 1  | 1  | Adjusted                   | Not adjusted  | Not adjusted  | 1                     | 1                 | 0                 | 7         |
| Hoevenaer-Blom-2014 <sup>158</sup> | 1                    | 1    | 1  | 1  | Adjusted                   | Not adjusted  | Not adjusted  | 1                     | 1                 | 1                 | 8         |
| Hulsegge-2016 <sup>167</sup>       | 1                    | 1    | 1  | 1  | Adjusted                   | Adjusted      | Adjusted      | 1                     | 1                 | 1                 | 9         |
| Inoue-Choi-2013 <sup>101</sup>     | 1                    | 1    | 0  | 1  | Adjusted                   | Adjusted      | Adjusted      | 1                     | 1                 | 1                 | 8         |
| Iversen-2010 <sup>102</sup>        | 1                    | 1    | 0  | 1  | Adjusted                   | Not adjusted  | Adjusted      | 1                     | 1                 | 1                 | 8         |
| Jin-2017 <sup>103</sup>            | 1                    | 1    | 1  | 1  | Adjusted                   | Adjusted      | Not adjusted  | 1                     | 1                 | 1                 | 9         |
| Khaw-2008 <sup>63</sup>            | 1                    | 1    | 1  | 1  | Adjusted                   | Not adjusted  | Adjusted      | 1                     | 1                 | 1                 | 9         |
| Khera-2016 <sup>176</sup>          | 1                    | 1    | 1  | 1  | Adjusted                   | Not adjusted  | Adjusted      | 1                     | 1                 | 0                 | 8         |
| Kim-2013 <sup>104</sup>            | 1                    | 1    | 1  | 1  | Adjusted                   | Not adjusted  | Adjusted      | 1                     | 1                 | 1                 | 9         |
| King-2013 <sup>105</sup>           | 1                    | 1    | 1  | 1  | Adjusted                   | Not adjusted  | Not adjusted  | 1                     | 1                 | 0                 | 7         |
| Knoops-2004 <sup>106</sup>         | 1                    | 1    | 1  | 1  | Adjusted                   | Not adjusted  | Adjusted      | 0                     | 1                 | 1                 | 8         |
| Krokstad-2017 <sup>107</sup>       | 1                    | 1    | 1  | 1  | Adjusted                   | Not adjusted  | Not adjusted  | 1                     | 1                 | 0                 | 8         |
| Kulshreshtha-2013 <sup>180</sup>   | 1                    | 1    | 1  | 1  | Adjusted                   | Not adjusted  | Adjusted      | 1                     | 0                 | 1                 | 8         |
| Kvaavik-2010 <sup>108</sup>        | 1                    | 1    | 1  | 1  | Adjusted                   | Adjusted      | Adjusted      | 1                     | 1                 | 0                 | 8         |
| Lachman-2016 <sup>65</sup>         | 1                    | 1    | 1  | 1  | Adjusted                   | Not adjusted  | Not adjusted  | 1                     | 1                 | 0                 | 7         |
| Larsson-2014 <sup>181</sup>        | 1                    | 1    | 0  | 1  | Adjusted                   | Adjusted      | Adjusted      | 1                     | 1                 | 1                 | 8         |
| Larsson-2015 <sup>182</sup>        | 1                    | 1    | 1  | 1  | Adjusted                   | Adjusted      | Adjusted      | 1                     | 1                 | 1                 | 9         |
| Larsson-2016 (1)<br>188            | 1                    | 1    | 0  | 1  | Adjusted                   | Adjusted      | Adjusted      | 1                     | 1                 | 1                 | 8         |
| Larsson-2016                       | 1                    | 1    | 0  | 1  | Adjusted                   | Not adjusted  | Adjusted      | 1                     | 1                 | 1                 | 8         |

| Author-year                           | Selection of cohorts |      |    |    | Comparability of cohorts*  |               |               | Assessment of outcome |                   |                   | NOS score |
|---------------------------------------|----------------------|------|----|----|----------------------------|---------------|---------------|-----------------------|-------------------|-------------------|-----------|
|                                       | REC                  | SNEC | AE | NO | Demographic characteristic | Complications | Other factors | AO                    | FULE <sup>†</sup> | AFUC <sup>‡</sup> |           |
| (2) <sup>194</sup>                    |                      |      |    |    |                            |               |               |                       |                   |                   |           |
| Larsson-2017 <sup>109</sup>           | 1                    | 1    | 1  | 1  | Adjusted                   | Adjusted      | Adjusted      | 1                     | 1                 | 1                 | 9         |
| Lee-2009 <sup>110</sup>               | 1                    | 1    | 1  | 1  | Adjusted                   | Adjusted      | Adjusted      | 0                     | 1                 | 0                 | 7         |
| Leger-2018 <sup>111</sup>             | 1                    | 1    | 0  | 1  | Adjusted                   | Not adjusted  | Adjusted      | 0                     | 0                 | 1                 | 6         |
| Li-2018 <sup>1</sup>                  | 1                    | 1    | 0  | 1  | Adjusted                   | Adjusted      | Adjusted      | 1                     | 1                 | 1                 | 8         |
| Lin-2012 <sup>112</sup>               | 1                    | 1    | 1  | 1  | Adjusted                   | Adjusted      | Adjusted      | 1                     | 0                 | 0                 | 7         |
| Lin-2015 <sup>113</sup>               | 1                    | 1    | 1  | 1  | Adjusted                   | Not adjusted  | Not adjusted  | 1                     | 1                 | 1                 | 8         |
| Lingfors-2019 <sup>114</sup>          | 1                    | 1    | 1  | 1  | Adjusted                   | Not adjusted  | Not adjusted  | 1                     | 1                 | 1                 | 8         |
| Liu-2014 <sup>115</sup>               | 1                    | 1    | 1  | 1  | Adjusted                   | Not adjusted  | Adjusted      | 1                     | 0                 | 1                 | 8         |
| Liu-2018 <sup>159</sup>               | 1                    | 1    | 1  | 1  | Adjusted                   | Adjusted      | Adjusted      | 1                     | 1                 | 1                 | 9         |
| Lohse-2016 <sup>116</sup>             | 1                    | 1    | 1  | 1  | Adjusted                   | Not adjusted  | Adjusted      | 1                     | 1                 | 1                 | 9         |
| Long-2014 <sup>168</sup>              | 1                    | 1    | 1  | 1  | Adjusted                   | Not adjusted  | Adjusted      | 1                     | 1                 | 1                 | 9         |
| Lopez-Laguna-2018 <sup>195</sup>      | 1                    | 1    | 1  | 1  | Adjusted                   | Adjusted      | Adjusted      | 1                     | 0                 | 1                 | 9         |
| Luoto-1998 <sup>160</sup>             | 1                    | 1    | 1  | 1  | Adjusted                   | Not adjusted  | Adjusted      | 1                     | 1                 | 1                 | 9         |
| Lv-2017 <sup>177</sup>                | 1                    | 1    | 1  | 1  | Adjusted                   | Not adjusted  | Adjusted      | 1                     | 1                 | 1                 | 9         |
| Maron-2018 <sup>60</sup>              | 1                    | 1    | 1  | 1  | Adjusted                   | Adjusted      | Adjusted      | 1                     | 1                 | 1                 | 9         |
| Martin-Diener-2014 <sup>117</sup>     | 1                    | 1    | 1  | 1  | Adjusted                   | Not adjusted  | Adjusted      | 1                     | 1                 | 1                 | 8         |
| Martínez-González-2013 <sup>118</sup> | 1                    | 1    | 1  | 1  | Adjusted                   | Adjusted      | Adjusted      | 1                     | 1                 | 0                 | 8         |
| McCullough-2011 <sup>119</sup>        | 1                    | 1    | 0  | 1  | Adjusted                   | Not adjusted  | Adjusted      | 1                     | 1                 | 0                 | 7         |
| Meng-1999 <sup>120</sup>              | 1                    | 1    | 0  | 1  | Adjusted                   | Not adjusted  | Not adjusted  | 1                     | 1                 | 1                 | 8         |
| Miao-2015 <sup>71</sup>               | 1                    | 1    | 1  | 1  | Adjusted                   | Adjusted      | Adjusted      | 1                     | 1                 | 1                 | 9         |
| Minlikeeva-2019 <sup>121</sup>        | 1                    | 1    | 1  | 1  | Adjusted                   | Not adjusted  | Adjusted      | 1                     | 0                 | 0                 | 7         |

| Author-year                    | Selection of cohorts |      |    |    | Comparability of cohorts * |               |               | Assessment of outcome |        |        | NOS score |
|--------------------------------|----------------------|------|----|----|----------------------------|---------------|---------------|-----------------------|--------|--------|-----------|
|                                | REC                  | SNEC | AE | NO | Demographic characteristic | Complications | Other factors | AO                    | FULE † | AFUC ‡ |           |
| Mitchell-2010 <sup>161</sup>   | 1                    | 1    | 1  | 1  | Adjusted                   | Not adjusted  | Adjusted      | 1                     | 1      | 0      | 8         |
| Mok-2018 <sup>122</sup>        | 1                    | 1    | 1  | 1  | Adjusted                   | Adjusted      | Adjusted      | 1                     | 0      | 0      | 7         |
|                                | 1                    | 1    | 1  | 1  |                            |               |               | 0                     | 0      | 0      | 6         |
|                                | 1                    | 1    | 1  | 1  |                            |               |               | 1                     | 1      | 0      | 7         |
| Muntner-2013 <sup>123</sup>    | 1                    | 1    | 1  | 1  | Adjusted                   | Adjusted      | Adjusted      | 0                     | 0      | 0      | 6         |
| Myint-2009 <sup>183</sup>      | 1                    | 1    | 1  | 1  | Adjusted                   | Adjusted      | Adjusted      | 1                     | 1      | 0      | 8         |
| Naylor-2016 <sup>189</sup>     | 1                    | 1    | 1  | 1  | Adjusted                   | Not adjusted  | Adjusted      | 1                     | 1      | 0      | 8         |
| Nechuta-2010 <sup>124</sup>    | 1                    | 1    | 1  | 1  | Adjusted                   | Not adjusted  | Not adjusted  | 1                     | 1      | 1      | 8         |
| Nguyen-2019 <sup>200</sup>     | 1                    | 1    | 0  | 1  | Adjusted                   | Not adjusted  | Adjusted      | 0                     | 0      | 0      | 5         |
| Nöthlings-2010 <sup>28</sup>   | 1                    | 1    | 1  | 1  | Adjusted                   | Adjusted      | Adjusted      | 1                     | 1      | 0      | 8         |
| Odegaard-2011 <sup>126</sup>   | 1                    | 1    | 0  | 1  | Adjusted                   | Not adjusted  | Adjusted      | 1                     | 1      | 0      | 7         |
| Ogunmoroti-2017 <sup>190</sup> | 1                    | 1    | 1  | 1  | Adjusted                   | Not adjusted  | Adjusted      | 1                     | 1      | 0      | 8         |
| Ommerborn-2016 <sup>169</sup>  | 1                    | 1    | 1  | 1  | Adjusted                   | Not adjusted  | Not adjusted  | 1                     | 1      | 1      | 8         |
| Patel-2018 <sup>127</sup>      | 1                    | 1    | 0  | 1  | Adjusted                   | Adjusted      | Adjusted      | 1                     | 1      | 0      | 7         |
| Paynter-2014 <sup>170</sup>    | 1                    | 1    | 1  | 1  | Adjusted                   | Adjusted      | Adjusted      | 1                     | 1      | 1      | 9         |
| Pelser-2014 <sup>128</sup>     | 1                    | 1    | 0  | 1  | Adjusted                   | Not adjusted  | Adjusted      | 1                     | 1      | 0      | 7         |
| Petersen-2015 <sup>129</sup>   | 1                    | 1    | 1  | 1  | Adjusted                   | Not adjusted  | Not adjusted  | 1                     | 1      | 1      | 8         |
| Prinelli-2015 <sup>130</sup>   | 1                    | 1    | 1  | 1  | Adjusted                   | Not adjusted  | Adjusted      | 1                     | 1      | 1      | 9         |
| Ricardo-2013 <sup>131</sup>    | 1                    | 1    | 1  | 1  | Adjusted                   | Adjusted      | Adjusted      | 1                     | 1      | 0      | 8         |
| Ricardo-2015 <sup>132</sup>    | 1                    | 1    | 1  | 1  | Adjusted                   | Adjusted      | Adjusted      | 0                     | 0      | 0      | 6         |
| Rist-2016 <sup>58</sup>        | 1                    | 1    | 0  | 1  | Adjusted                   | Adjusted      | Adjusted      | 1                     | 1      | 0      | 7         |
| Rizzuto-2016 <sup>133</sup>    | 1                    | 1    | 1  | 1  | Adjusted                   | Adjusted      | Adjusted      | 1                     | 1      | 1      | 9         |
| Romaguera-2015 <sup>3</sup>    | 1                    | 1    | 0  | 1  | Adjusted                   | Not adjusted  | Adjusted      | 0                     | 0      | 1      | 6         |
| Sovic-2012 <sup>134</sup>      | 1                    | 1    | 1  | 1  | Adjusted                   | Adjusted      | Adjusted      | 0                     | 0      | 1      | 7         |
| Spahillari-2017 <sup>191</sup> | 1                    | 1    | 1  | 1  | Adjusted                   | Not adjusted  | Not adjusted  | 1                     | 1      | 1      | 8         |



| Author-year                         | Selection of cohorts |      |    |    | Comparability of cohorts * |               |               | Assessment of outcome |        |        | NOS score |
|-------------------------------------|----------------------|------|----|----|----------------------------|---------------|---------------|-----------------------|--------|--------|-----------|
|                                     | REC                  | SNEC | AE | NO | Demographic characteristic | Complications | Other factors | AO                    | FULE † | AFUC ‡ |           |
| Struijk-2014 <sup>162</sup>         | 1                    | 1    | 1  | 1  | Adjusted                   | Not adjusted  | Adjusted      | 1                     | 1      | 1      | 9         |
| Tamakoshi-2009 <sup>135</sup>       | 1                    | 1    | 0  | 1  | Adjusted                   | Not adjusted  | Adjusted      | 1                     | 1      | 1      | 8         |
| Tamakoshi-2010 <sup>136</sup>       | 1                    | 1    | 0  | 1  | Adjusted                   | Not adjusted  | Not adjusted  | 1                     | 1      | 0      | 6         |
| Tamosiunas-2014 <sup>137</sup>      | 1                    | 1    | 1  | 1  | Adjusted                   | Not adjusted  | Adjusted      | 1                     | 1      | 0      | 8         |
| Taubman-2009 <sup>178</sup>         | 1                    | 1    | 0  | 1  | Adjusted                   | Not adjusted  | Adjusted      | 0                     | 1      | 1      | 7         |
| Thomson-2014 <sup>138</sup>         | 1                    | 1    | 1  | 1  | Adjusted                   | Not adjusted  | Adjusted      | 1                     | 1      | 0      | 8         |
| Towfighi-2012 <sup>139</sup>        | 1                    | 1    | 1  | 1  | Adjusted                   | Adjusted      | Not adjusted  | 1                     | 1      | 0      | 8         |
| Tsubono-1993 <sup>140</sup>         | 1                    | 1    | 0  | 1  | Adjusted                   | Not adjusted  | Adjusted      | 1                     | 0      | 1      | 7         |
| Tsubono-2004 <sup>141</sup>         | 1                    | 1    | 0  | 1  | Adjusted                   | Adjusted      | Adjusted      | 1                     | 1      | 1      | 8         |
| Unkart-2019 <sup>196</sup>          | 1                    | 1    | 1  | 1  | Adjusted                   | Not adjusted  | Not adjusted  | 1                     | 1      | 0      | 7         |
| Van Blarigan-2018 <sup>142</sup>    | 1                    | 1    | 1  | 1  | Adjusted                   | Adjusted      | Adjusted      | 0                     | 1      | 1      | 8         |
| Van Dam-2008 <sup>67</sup>          | 1                    | 1    | 0  | 1  | Adjusted                   | Not adjusted  | Adjusted      | 0                     | 1      | 0      | 6         |
| Van Den Brandt-2011 <sup>143</sup>  | 1                    | 1    | 0  | 1  | Adjusted                   | Adjusted      | Adjusted      | 1                     | 1      | 1      | 8         |
| van Lee-2016 <sup>144</sup>         | 1                    | 1    | 1  | 1  | Adjusted                   | Not adjusted  | Adjusted      | 1                     | 1      | 1      | 9         |
| Vergnaud-2013 <sup>145</sup>        | 1                    | 1    | 0  | 1  | Adjusted                   | Not adjusted  | Adjusted      | 0                     | 1      | 1      | 7         |
| Wang-2011 <sup>192</sup>            | 1                    | 1    | 1  | 1  | Adjusted                   | Adjusted      | Adjusted      | 1                     | 1      | 1      | 9         |
| Warren Andersen-2016 <sup>163</sup> | 1                    | 1    | 1  | 1  | Adjusted                   | Not adjusted  | Adjusted      | 1                     | 0      | 0      | 7         |
| Warren Andersen-2018 <sup>146</sup> | 1                    | 1    | 1  | 1  | Adjusted                   | Not adjusted  | Adjusted      | 1                     | 1      | 0      | 8         |
| Wingard-1982 <sup>147</sup>         | 1                    | 1    | 0  | 1  | Adjusted                   | Not adjusted  | Adjusted      | 1                     | 0      | 1      | 7         |
| Wu-2012 <sup>171</sup>              | 1                    | 1    | 1  | 1  | Adjusted                   | Not adjusted  | Not adjusted  | 1                     | 0      | 1      | 7         |

| Author-year                   | Selection of cohorts |      |    |    | Comparability of cohorts*  |               |               | Assessment of outcome |                   |                   | NOS score |
|-------------------------------|----------------------|------|----|----|----------------------------|---------------|---------------|-----------------------|-------------------|-------------------|-----------|
|                               | REC                  | SNEC | AE | NO | Demographic characteristic | Complications | Other factors | AO                    | FULE <sup>†</sup> | AFUC <sup>‡</sup> |           |
| Yang-2012 <sup>148</sup>      | 1                    | 1    | 1  | 1  | Adjusted                   | Not adjusted  | Adjusted      | 1                     | 1                 | 0                 | 8         |
| Yates-2008 <sup>149</sup>     | 1                    | 1    | 1  | 1  | Not adjusted               | Not adjusted  | Not adjusted  | 1                     | 1                 | 0                 | 6         |
| Yun-2012 <sup>150</sup>       | 1                    | 1    | 1  | 1  | Adjusted                   | Not adjusted  | Not adjusted  | 1                     | 1                 | 0                 | 7         |
| Zhang-2011 <sup>73</sup>      | 1                    | 1    | 1  | 1  | Adjusted                   | Adjusted      | Adjusted      | 1                     | 1                 | 0                 | 8         |
| Zhang-2013 <sup>185</sup>     | 1                    | 1    | 1  | 1  | Adjusted                   | Not adjusted  | Adjusted      | 1                     | 0                 | 0                 | 7         |
| Zhang-2014 <sup>54</sup>      | 1                    | 1    | 1  | 1  | Adjusted                   | Not adjusted  | Adjusted      | 1                     | 0                 | 0                 | 7         |
| Zhang-2017 (1) <sup>151</sup> | 1                    | 1    | 1  | 1  | Adjusted                   | Adjusted      | Adjusted      | 1                     | 1                 | 0                 | 8         |
| Zhou-2018 <sup>152</sup>      | 1                    | 1    | 1  | 1  | Adjusted                   | Not adjusted  | Adjusted      | 1                     | 1                 | 0                 | 8         |

\*To evaluate the comparability of the exposed cohort and non-exposed cohort, if the authors performed stratified analyses or adjustments for one of the following demographic characteristics, age, gender, race, marriage, education, occupation or income, then a point would be assigned to this study. If the authors performed stratified analyses or adjustments for participants' health status or other characteristics, another point would be assigned to this study.

<sup>†</sup>The follow-up duration was not deemed as long enough for outcome to occur if the median or mean follow-up duration was less than five years. When the median or mean follow-up duration was not reported, the follow-up duration was not deemed as long enough for outcome to occur if the study duration was less than 10 years or not reported.

<sup>‡</sup>The follow up of a cohort was deemed as inadequate if more than 20% of the participants failed to be followed up or the study failed to report this information.

<sup>§</sup>Because of the attainments of coronary heart disease cases and hypertension cases were different, the NOS score for coronary heart disease was 8, whereas the NOS score for hypertension was 7.

<sup>||</sup>Since the study investigated the relation of life's simple seven with various cardiovascular disease incidence and mortality in different population. The first line is the evaluation for cardiovascular disease incidence in patients with myocardial infarction, the second line is the evaluation for mortality in patients with myocardial infarction, and the third line is the evaluation for myocardial infarction incidence in the whole population.

AE, ascertainment of exposure; AFUC, adequacy of follow up of cohorts; AO, assessment of outcome; FULE, was follow-up long enough for outcome to occur; NO, demonstration that outcome of interest was not present at start of study; NOS, Newcastle–Ottawa Scale; REC, representativeness of the exposed cohort; SNEC, selection of the non-exposed cohort.

**Table A9.** Results of publication bias test

| <b>Outcomes</b>                  | <b>Classic fail-safe N</b> | <b><i>P</i>-value for Begg and Mazumdar rank correlation</b> | <b><i>P</i>-value for Egger's regression intercept</b> |
|----------------------------------|----------------------------|--------------------------------------------------------------|--------------------------------------------------------|
| All-cause mortality              | 119803                     | 0.03                                                         | 0.05                                                   |
| Cardiovascular disease mortality | 17161                      | 0.03                                                         | 0.001                                                  |
| Coronary heart disease mortality | 603                        | 0.19                                                         | 0.04                                                   |
| Stroke mortality                 | 155                        | 0.71                                                         | 0.37                                                   |
| Incident cardiovascular disease  | 5615                       | 0.21                                                         | 0.06                                                   |
| Incident coronary heart disease  | 6550                       | 0.32                                                         | 0.04                                                   |
| Incident stroke                  | 2423                       | 0.90                                                         | 0.08                                                   |

**Table A10.** Results of subgroup analyses for incident coronary heart disease

| Subgroup                            | Studies | Participants | Cases     | HR (95% CI)         | <i>P</i>                                | <i>I</i> <sup>2</sup> , % |
|-------------------------------------|---------|--------------|-----------|---------------------|-----------------------------------------|---------------------------|
| All                                 | 22      | 1,492,174    | 62,126    | 0.31 (0.24 to 0.40) | <0.001                                  | 93.0                      |
| Continent                           |         |              |           |                     | <i>P</i> <sub>between-group</sub> =0.43 |                           |
| America                             | 11      | 308,901      | 13,452    | 0.29 (0.20 to 0.40) | <0.001                                  | 87.4                      |
| Asia                                | 4       | 647,734      | 23,407    | 0.46 (0.31 to 0.70) | <0.001                                  | 82.0                      |
| Europe                              | 7       | 535,539      | 25,267    | 0.28 (0.17 to 0.46) | <0.001                                  | 95.7                      |
| High-income country                 |         |              |           |                     | <i>P</i> <sub>between-group</sub> =0.19 |                           |
| Yes                                 | 18      | 844,440      | 38,719    | 0.28 (0.21 to 0.39) | <0.001                                  | 93.9                      |
| No                                  | 4       | 647,734      | 23,407    | 0.46 (0.31 to 0.70) | <0.001                                  | 82.0                      |
| Ethnicity *                         |         |              |           |                     | <i>P</i> <sub>between-group</sub> =0.69 |                           |
| Asian                               | 5       | 648,740      | 23,704    | 0.44 (0.30 to 0.65) | <0.001                                  | 77.6                      |
| African, American                   | 0       | 0            | 0         | NA                  | NA                                      | NA                        |
| White                               | 13      | 773,360      | 32,312    | 0.29 (0.20 to 0.41) | <0.001                                  | 94.7                      |
| Mixed                               | 4       | 26,463       | 2,237     | 0.31 (0.14 to 0.69) | 0.004                                   | 83.7                      |
| Missing                             | 1       | 43,611       | 3,873     | 0.25 (0.15 to 0.44) | <0.001                                  | 81.8                      |
| Follow-up                           |         |              |           |                     | <i>P</i> <sub>between-group</sub> =0.67 |                           |
| ≥10 years                           | 12      | 350,690      | 15,870    | 0.28 (0.18 to 0.44) | <0.001                                  | 94.2                      |
| <10 years                           | 10      | 1,141,484    | 46,256    | 0.34 (0.26 to 0.45) | <0.001                                  | 88.3                      |
| Average age *                       |         |              |           |                     | <i>P</i> <sub>between-group</sub> =0.24 |                           |
| ≥60 years old                       | 6       | >446,322 †   | >23,059 † | 0.38 (0.29 to 0.50) | <0.001                                  | 72.6                      |
| <60 years old                       | 17      | >951,865 †   | >38,279 † | 0.27 (0.19 to 0.38) | <0.001                                  | 93.8                      |
| Sex *                               |         |              |           |                     | <i>P</i> <sub>between-group</sub> =0.73 |                           |
| Men                                 | 6       | >267,755 †   | >13,251 † | 0.30 (0.17 to 0.55) | <0.001                                  | 81.8                      |
| Women                               | 7       | >485,883 †   | >16,701 † | 0.26 (0.16 to 0.43) | <0.001                                  | 85.6                      |
| Both                                | 13      | 644,549      | 31,386    | 0.33 (0.24 to 0.47) | <0.001                                  | 94.4                      |
| Proportion of high school graduates |         |              |           |                     | <i>P</i> <sub>between-group</sub> =0.66 |                           |
| ≥80%                                | 7       | 225,471      | 8,049     | 0.33 (0.20 to 0.54) | <0.001                                  | 87.0                      |
| <80%                                | 10      | 704,558      | 29,088    | 0.25 (0.14 to 0.43) | <0.001                                  | 95.4                      |
| Missing                             | 5       | 562,145      | 24,989    | 0.35 (0.26 to 0.48) | <0.001                                  | 86.9                      |
| Score *                             |         |              |           |                     | <i>P</i> <sub>between-group</sub> =0.08 |                           |
| Simple score                        | 14      | 457,242      | 15,133    | 0.31 (0.23 to 0.42) | <0.001                                  | 84.4                      |
| LS7 score                           | 7       | 634,037      | 24,294    | 0.26 (0.18 to 0.37) | <0.001                                  | 86.7                      |
| Others                              | 2       | 494,882      | 23,487    | 0.72 (0.36 to 1.44) | 0.35                                    | 97.2                      |
| Factors included in score *         |         |              |           |                     | <i>P</i> <sub>between-group</sub> =0.07 |                           |
| All five factors                    | 6       | 630,408      | 29,872    | 0.29 (0.18 to 0.48) | <0.001                                  | 90.7                      |
| Alcohol drinking excluded           | 13      | 737,059      | 29,673    | 0.31 (0.24 to 0.40) | <0.001                                  | 84.9                      |
| Body weight excluded                | 4       | 49,492       | 4,027     | 0.52 (0.31 to 0.86) | 0.01                                    | 89.2                      |
| Diet excluded                       | 2       | 445,068      | 20,737    | 0.35 (0.25 to 0.49) | <0.001                                  | 84.9                      |
| Physical activity excluded          | 1       | 88,940       | 456       | 0.08 (0.03 to 0.22) | <0.001                                  | NA                        |
| Smoking excluded                    | 1       | 33,671       | 1,630     | 1.02 (0.89 to 1.16) | <0.001                                  | NA                        |

\* Studies from several cohorts conducted stratified analyses, and thusly the total number of the studies from different groups exceeded the number of studies used in the main analysis.

† Several studies did not report the number of participants and cases in each subgroup.

CI, confidence interval; HR, hazard ratio; LS7, Life's Simple 7; NA, not available.

**Table A11.** Results of subgroup analyses for incident stroke

| Subgroup                            | Studies | Participants | Cases     | HR (95% CI)         | <i>P</i>                                 | <i>I</i> <sup>2</sup> , % |
|-------------------------------------|---------|--------------|-----------|---------------------|------------------------------------------|---------------------------|
| All                                 | 17      | 1,441,107    | 45,696    | 0.45 (0.37 to 0.54) | <0.001                                   | 80.0                      |
| Continent                           |         |              |           |                     | <i>P</i> <sub>between-group</sub> =0.84  |                           |
| America                             | 6       | 191,261      | 4,731     | 0.43 (0.32 to 0.57) | <0.001                                   | 46.7                      |
| Asia                                | 4       | 647,734      | 24,701    | 0.40 (0.24 to 0.68) | 0.001                                    | 94.6                      |
| Europe                              | 7       | 602,112      | 16,264    | 0.49 (0.39 to 0.62) | <0.001                                   | 72.2                      |
| High-income country                 |         |              |           |                     | <i>P</i> <sub>between-group</sub> =0.73  |                           |
| Yes                                 | 13      | 793,373      | 20,995    | 0.46 (0.38 to 0.55) | <0.001                                   | 64.1                      |
| No                                  | 4       | 647,734      | 24,701    | 0.40 (0.24 to 0.68) | <0.001                                   | 94.6                      |
| Ethnicity *                         |         |              |           |                     | <i>P</i> <sub>between-group</sub> =0.61  |                           |
| Asian                               | 4       | 647,734      | 24,701    | 0.40 (0.24 to 0.68) | 0.001                                    | 94.6                      |
| African, American                   | 2       | 14,106       | 312       | 0.46 (0.15 to 1.43) | 0.18                                     | 35.5                      |
| White                               | 12      | 777,990      | 20,554    | 0.45 (0.38 to 0.54) | <0.001                                   | 62.8                      |
| Mixed                               | 1       | 1,277        | 129       | 1.03 (0.36 to 2.95) | 0.96                                     | NA                        |
| Missing                             | 0       | 0            | 0         | NA                  | NA                                       | NA                        |
| Follow-up                           |         |              |           |                     | <i>P</i> <sub>between-group</sub> =0.32  |                           |
| ≥10 years                           | 9       | 290,101      | 8,384     | 0.40 (0.29 to 0.55) | <0.001                                   | 76.7                      |
| <10 years                           | 8       | 1,151,006    | 37,312    | 0.49 (0.39 to 0.63) | <0.001                                   | 84.7                      |
| Average age *                       |         |              |           |                     | <i>P</i> <sub>between-group</sub> =0.13  |                           |
| ≥60 years old                       | 8       | >517,711 †   | >13,616 † | 0.49 (0.44 to 0.56) | <0.001                                   | 5.6                       |
| <60 years old                       | 12      | >829,509 †   | >28,269 † | 0.33 (0.24 to 0.45) | <0.001                                   | 82.3                      |
| Sex *                               |         |              |           |                     | <i>P</i> <sub>between-group</sub> =0.006 |                           |
| Men                                 | 8       | >313,584 †   | >13,538 † | 0.33 (0.26 to 0.41) | <0.001                                   | 9.0                       |
| Women                               | 9       | >516,402 †   | >16,580 † | 0.33 (0.24 to 0.45) | <0.001                                   | 63.4                      |
| Both                                | 7       | 516,934      | 11,767    | 0.57 (0.47 to 0.69) | <0.001                                   | 54.5                      |
| Proportion of high school graduates |         |              |           |                     | <i>P</i> <sub>between-group</sub> =0.39  |                           |
| ≥80%                                | 4       | 186,055      | 4,961     | 0.36 (0.26 to 0.50) | <0.001                                   | 55.3                      |
| <80%                                | 10      | 738,716      | 28,227    | 0.47 (0.36 to 0.63) | <0.001                                   | 77.1                      |
| Missing                             | 3       | 516,336      | 12,508    | 0.51 (0.37 to 0.70) | <0.001                                   | 87.6                      |
| Score *                             |         |              |           |                     | <i>P</i> <sub>between-group</sub> =0.26  |                           |
| Simple score                        | 9       | 405,106      | 12,639    | 0.42 (0.31 to 0.56) | <0.001                                   | 76.9                      |
| LS7 score                           | 7       | 635,106      | 15,900    | 0.39 (0.30 to 0.52) | <0.001                                   | 80.8                      |
| Others                              | 2       | 494,882      | 19,875    | 0.65 (0.39 to 1.06) | 0.08                                     | 89.2                      |
| Factors included in score *         |         |              |           |                     | <i>P</i> <sub>between-group</sub> =0.28  |                           |
| All five factors                    | 7       | 729,137      | 28,475    | 0.39 (0.31 to 0.48) | <0.001                                   | 43.7                      |
| Alcohol drinking excluded           | 8       | 658,259      | 16,095    | 0.47 (0.36 to 0.62) | <0.001                                   | 86.0                      |
| Body weight excluded                | 3       | 65,238       | 1,624     | 0.50 (0.27 to 0.95) | 0.04                                     | 87.2                      |
| Diet excluded                       | 1       | 421,411      | 9,734     | 0.51 (0.45 to 0.58) | <0.001                                   | NA                        |
| Physical activity excluded          | 0       | 0            | 0         | NA                  | NA                                       | NA                        |
| Smoking excluded                    | 1       | 33,671       | 527       | 0.83 (0.66 to 1.04) | 0.11                                     | NA                        |

\* Studies from several cohorts conducted stratified analyses, and thusly the total number of the studies from different groups exceeded the number of studies used in the main analysis.

† Several studies did not report the number of participants and cases in each subgroup.

CI, confidence interval; HR, hazard ratio; LS7, Life's Simple 7; NA, not available.

**Figure A1.** Hazard ratios (95% CI) comparing individuals with the healthiest versus the least healthy lifestyles for all-cause mortality.

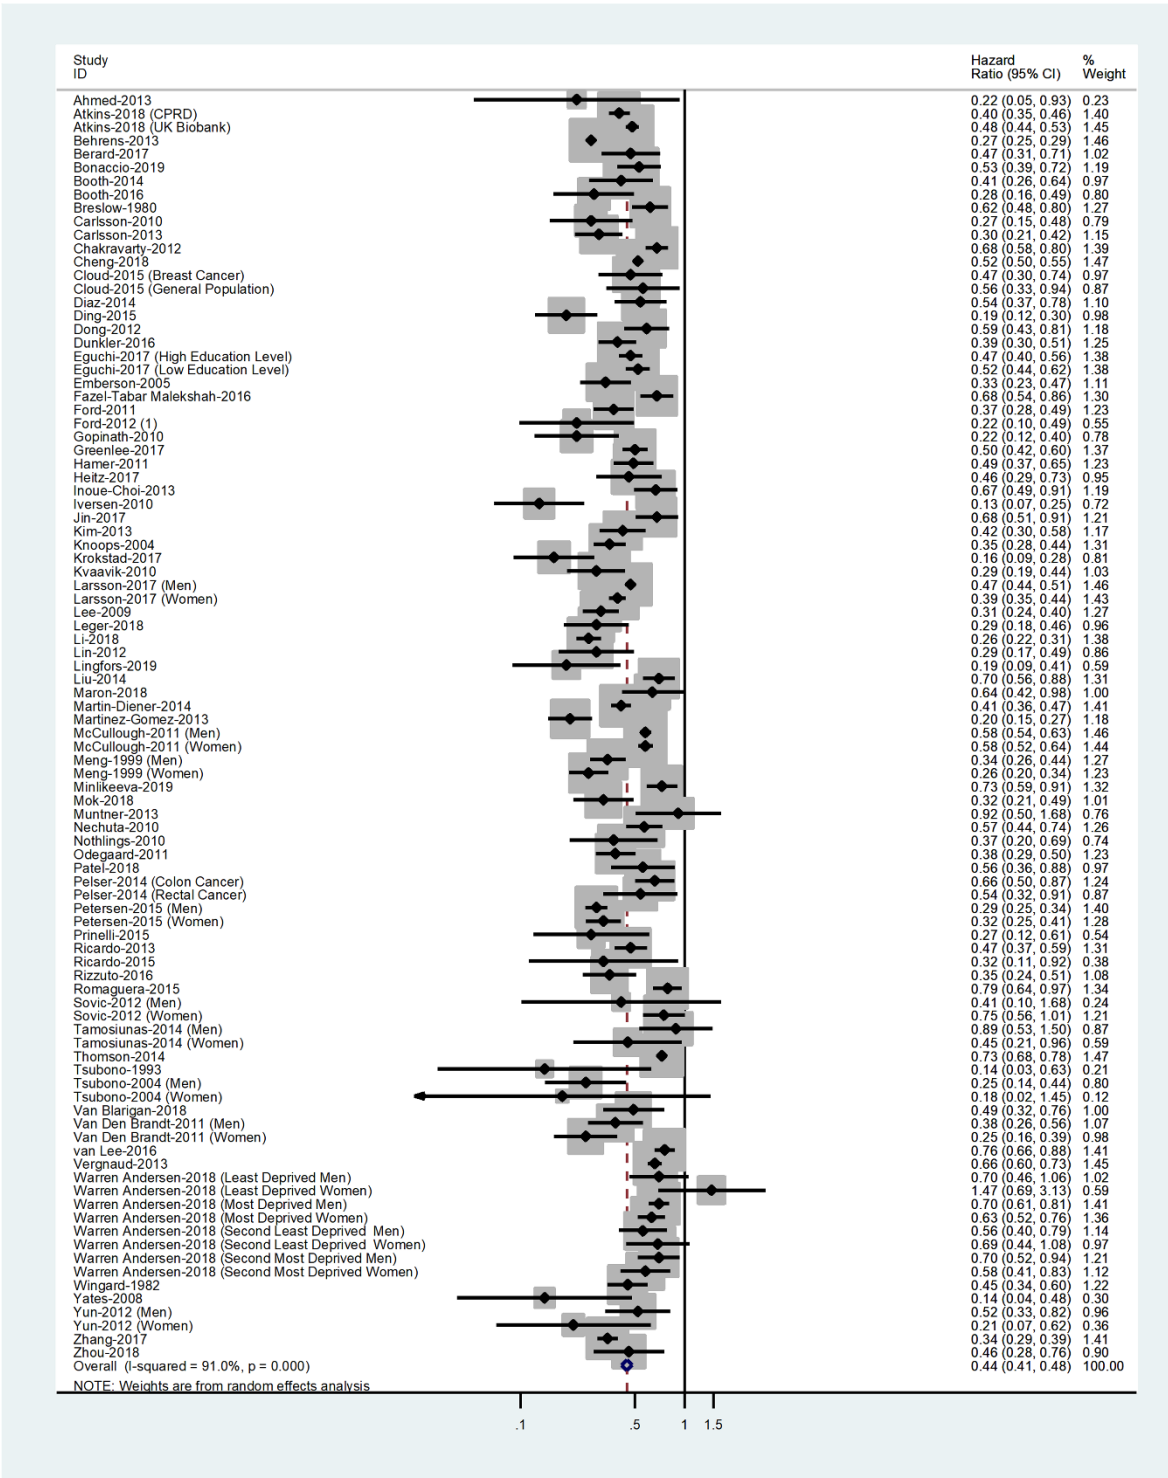



**Figure A2.** Hazard ratios (95% CI) comparing individuals with the healthiest versus the least healthy lifestyles for cardiovascular disease mortality.

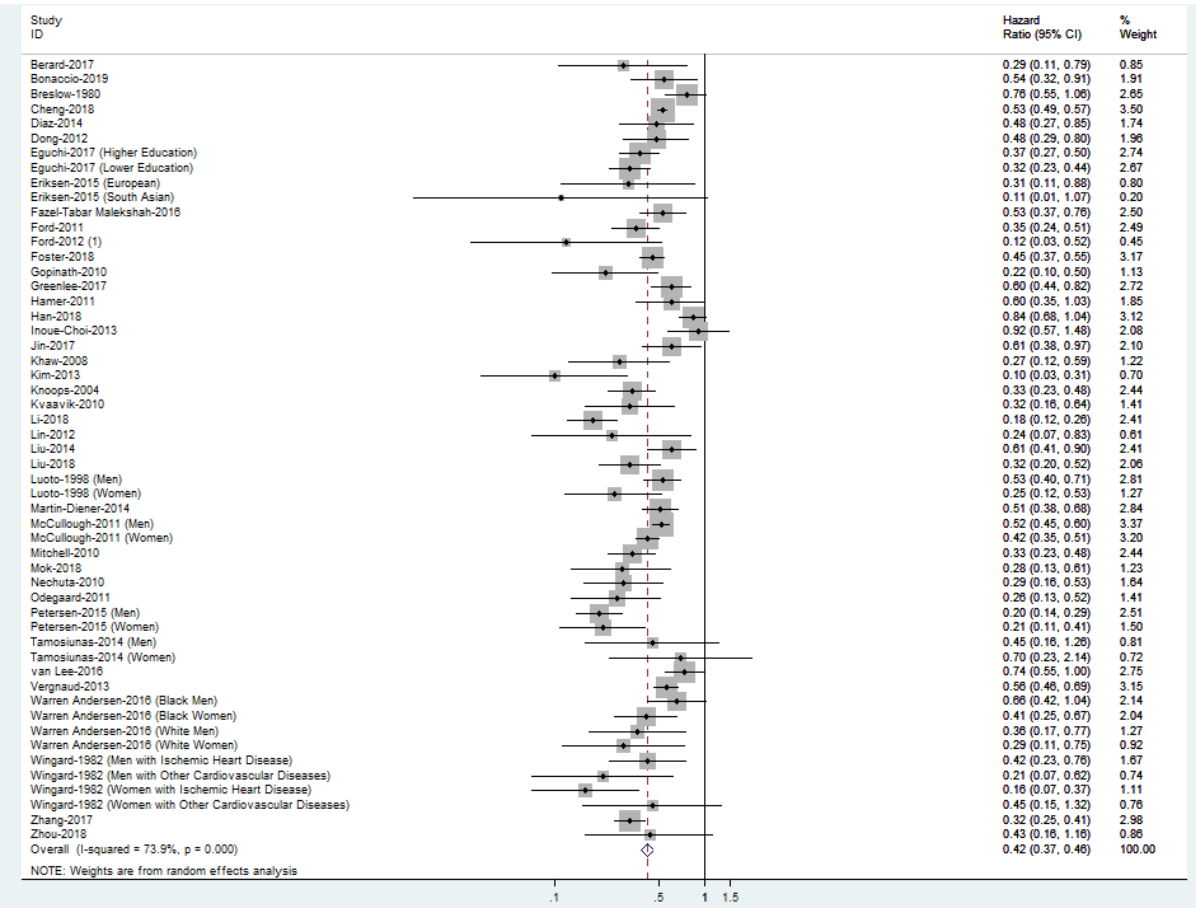

**Figure A3.** Hazard ratios (95% CI) comparing individuals with the healthiest versus the least healthy lifestyles for coronary heart disease mortality.

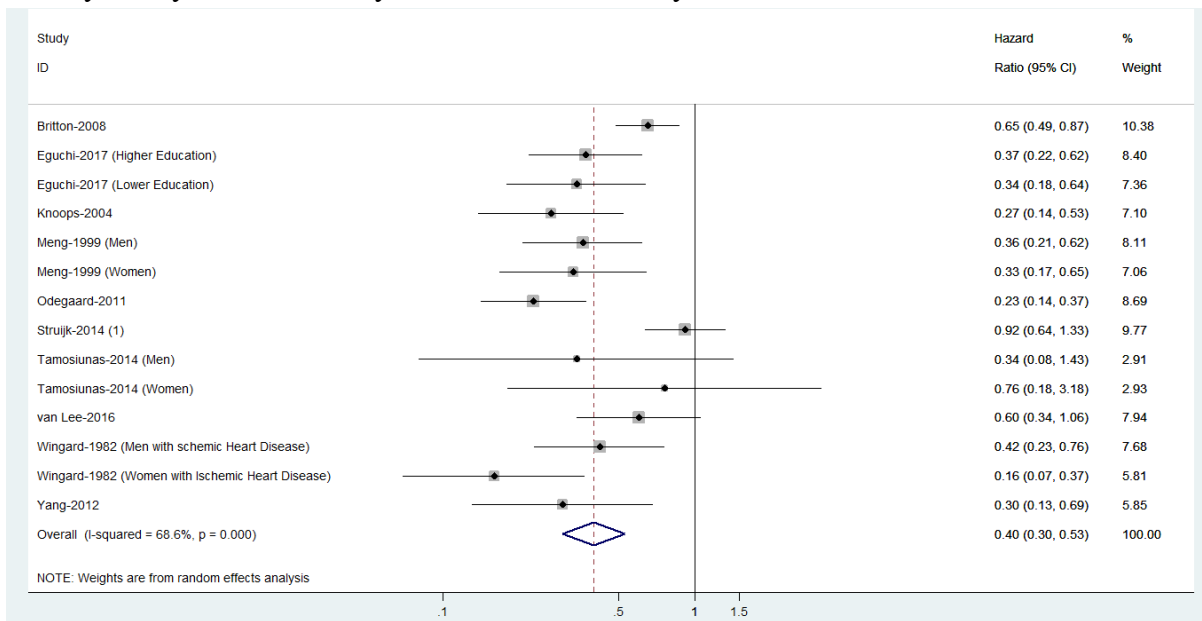

**Figure A4.** Hazard ratios (95% CI) comparing individuals with the healthiest versus the least healthy lifestyles for stroke mortality.

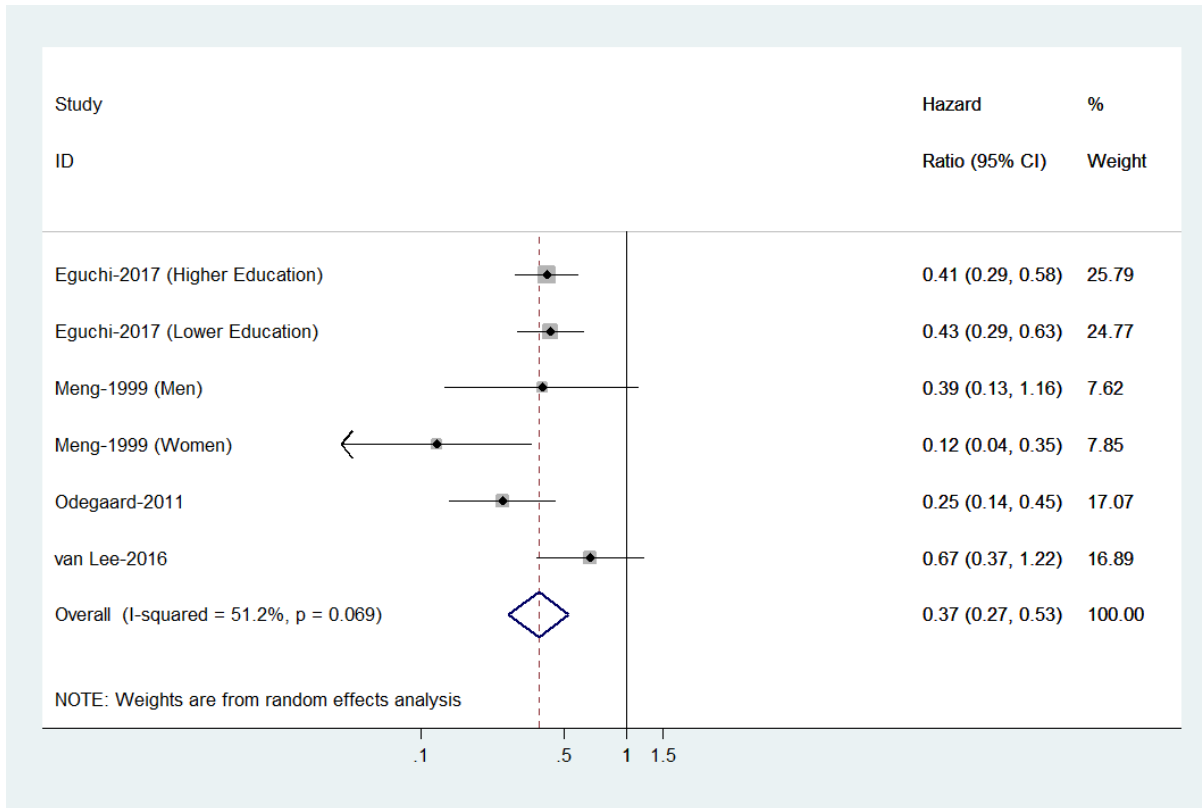

**Figure A5.** Hazard ratios (95% CI) comparing individuals with the healthiest versus the least healthy lifestyles for the risk of total cardiovascular disease.

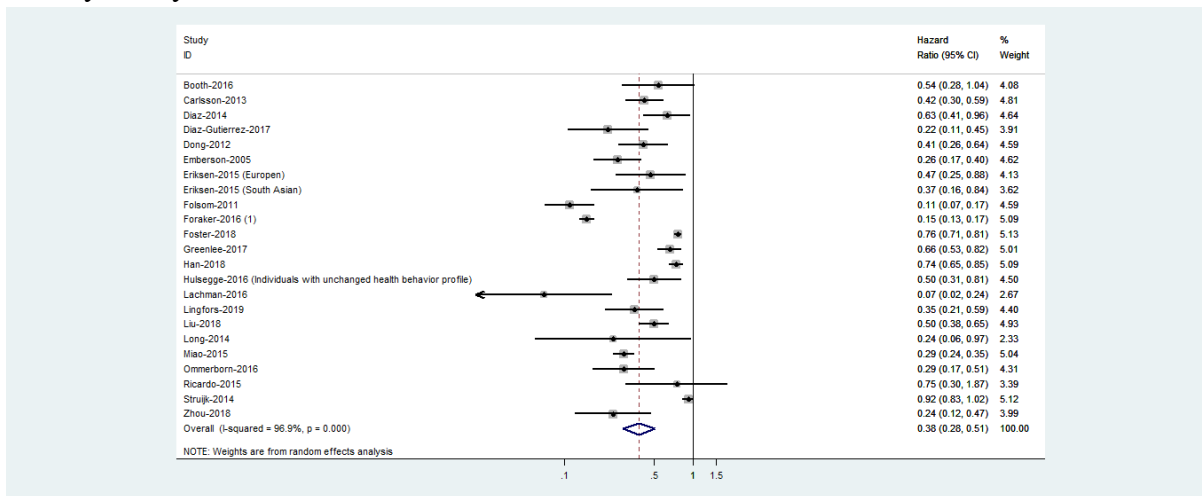

**Figure A6.** Hazard ratios (95% CI) comparing individuals with the healthiest versus the least healthy lifestyles for the risk of coronary heart disease.

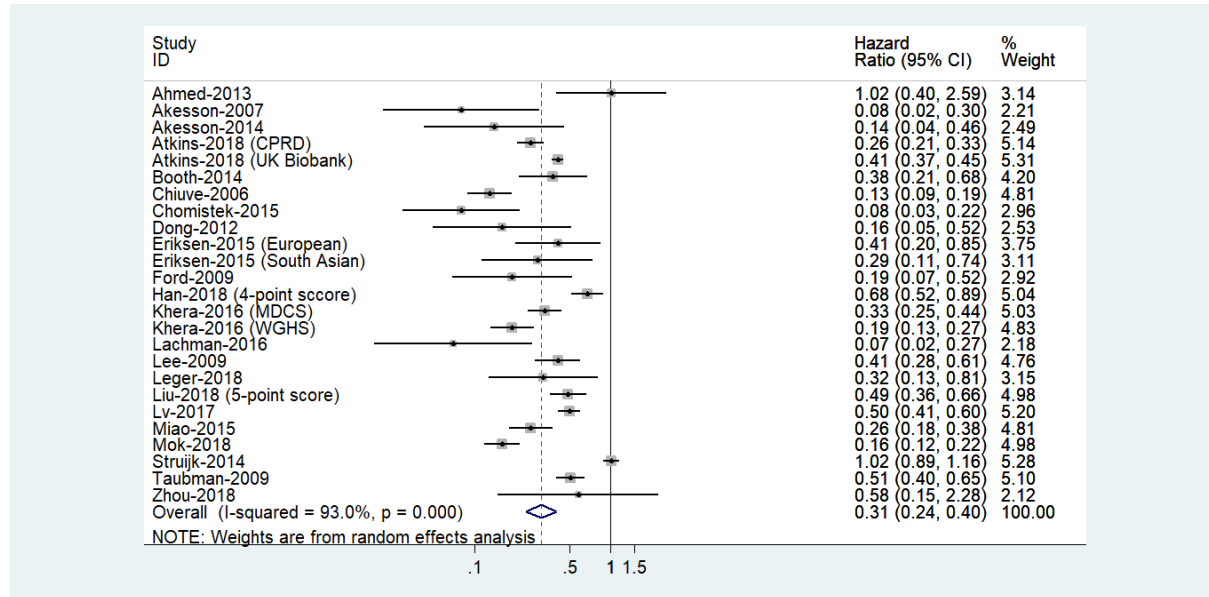

**Figure A7.** Hazard ratios (95% CI) comparing individuals with the healthiest versus the least healthy lifestyles for the risk of stroke.

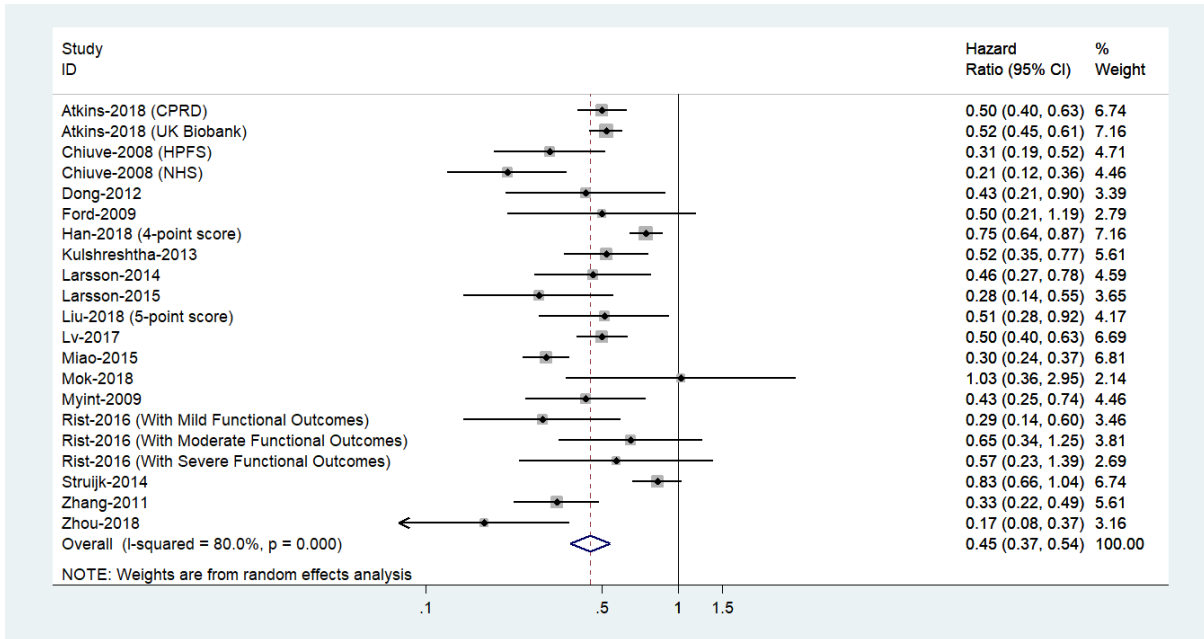

**Figure A8.** Hazard ratios (95% CI) comparing individuals with the healthiest versus the least healthy lifestyles for the risk of heart failure.

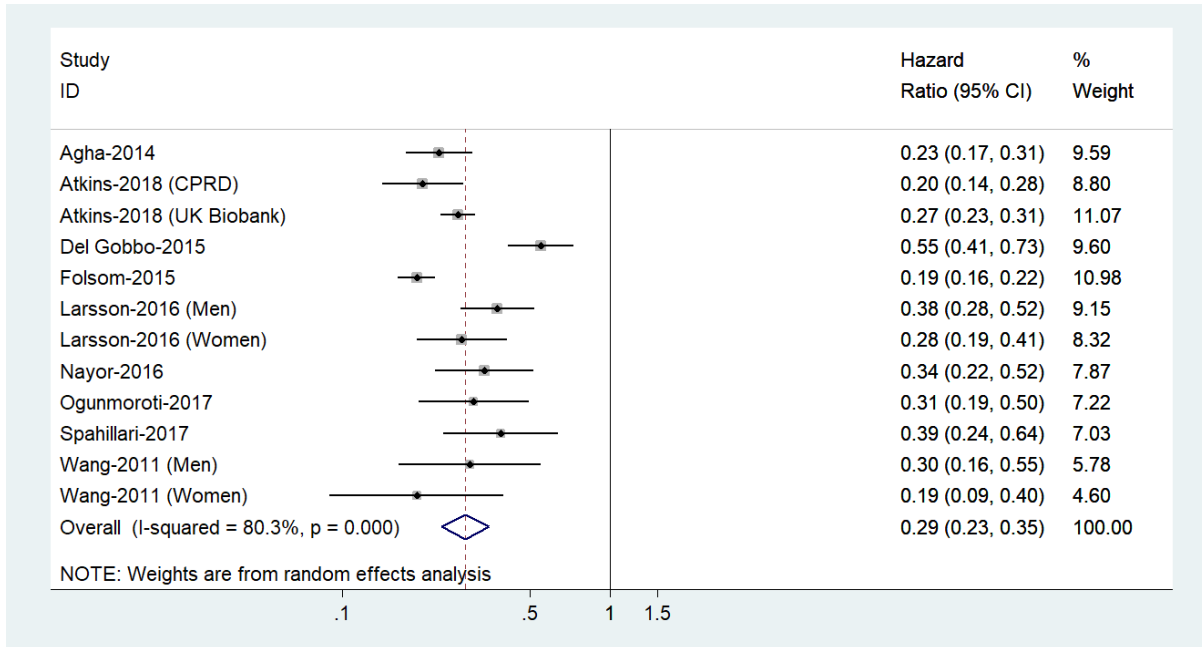

**Figure A9.** Hazard ratios (95% CI) comparing individuals with the healthiest versus the least healthy lifestyles for the risk of hypertension.

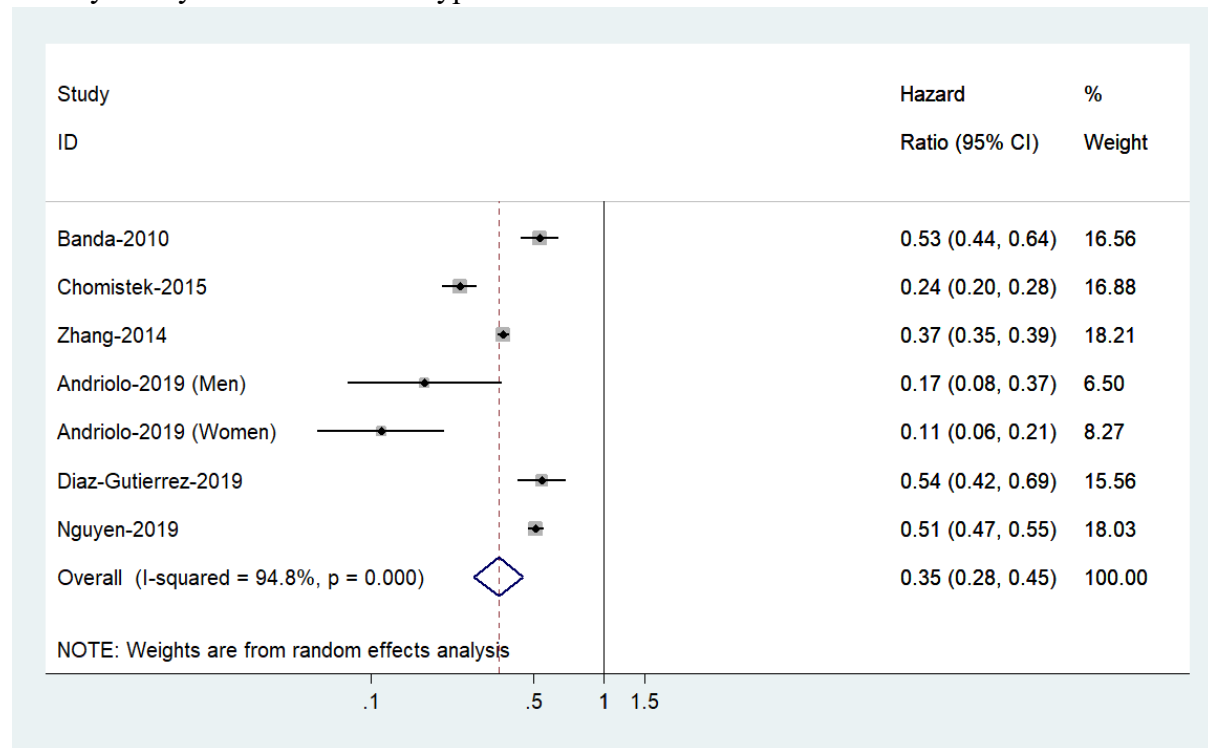



**Figure A10.** Hazard ratios (95% CI) comparing individuals with the healthiest versus the least healthy lifestyles for the risk of atrial fibrillation.

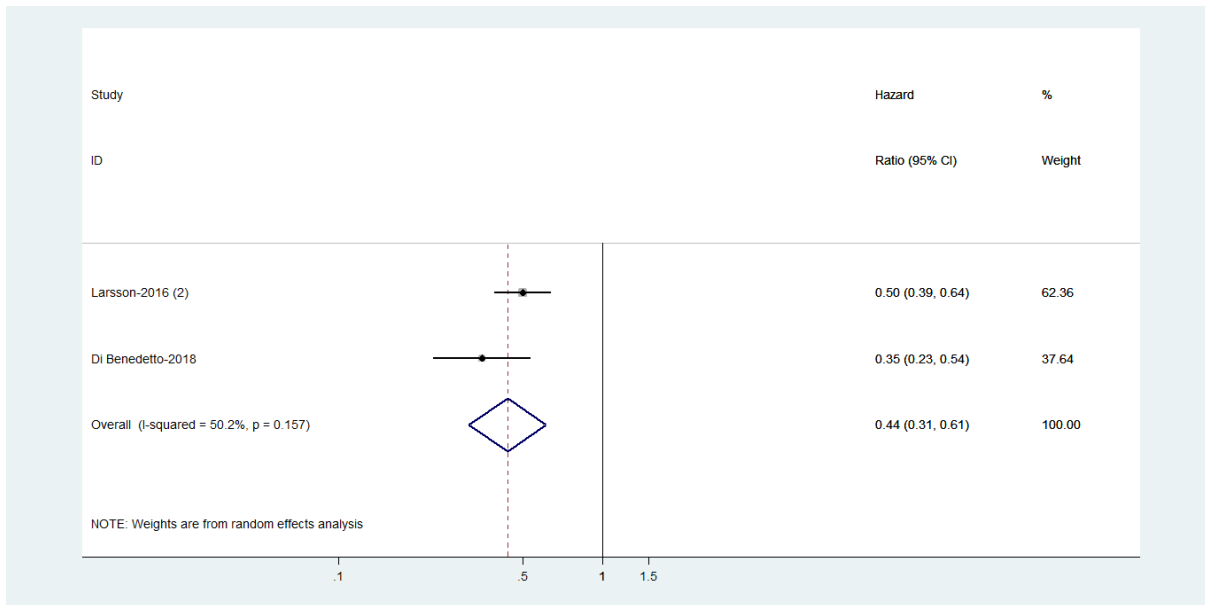

**Figure A11.** Hazard ratios (95% CI) comparing individuals with the healthiest versus the least healthy lifestyles for the risk of peripheral artery disease.

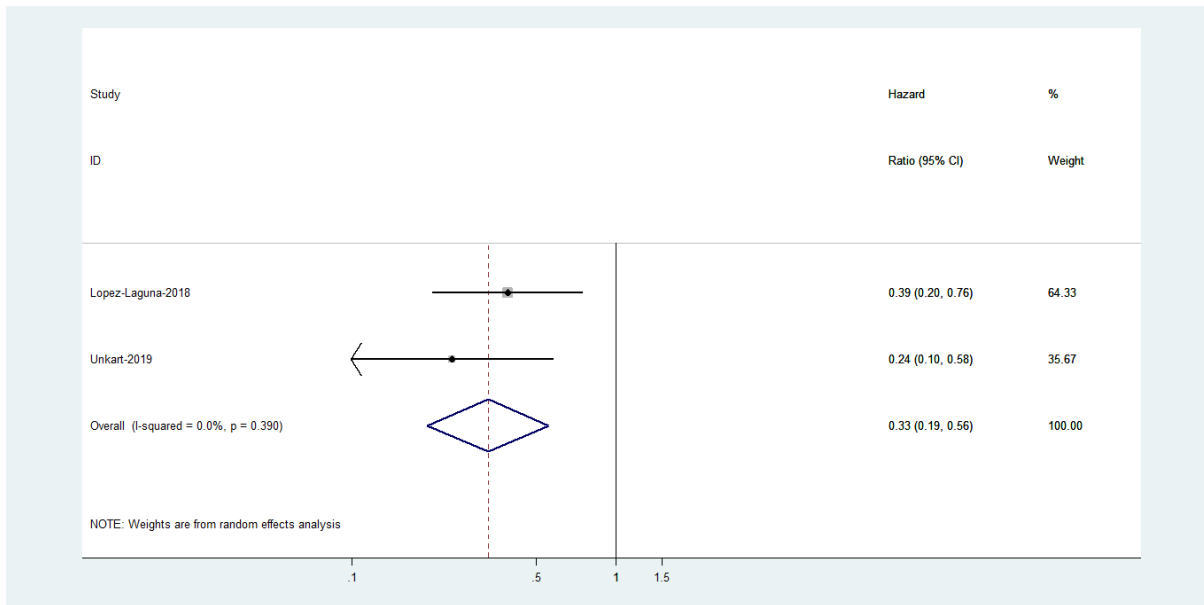

## References

1. Li Y, Pan A, Wang DD, *et al.* Impact of healthy lifestyle factors on life expectancies in the US population. *Circulation* 2018;138:345-55.
2. Folsom AR, Shah AM, Lutsey PL, *et al.* American Heart Association's Life's Simple 7: avoiding heart failure and preserving cardiac structure and function. *Am J Med* 2015;128:970-76.e2.
3. Romaguera D, Ward H, Wark PA, *et al.* Pre-diagnostic concordance with the WCRF/AICR guidelines and survival in European colorectal cancer patients: a cohort study. *BMC Med* 2015;13:107.
4. Abdullah Said M, Verweij N, Van Der Harst P. Associations of combined genetic and lifestyle risks with incident cardiovascular disease and diabetes in the UK biobank study. *JAMA Cardiol* 2018;3:693-702.
5. Avanzini F, Marzona I, Baviera M, *et al.* Improving cardiovascular prevention in general practice: results of a comprehensive personalized strategy in subjects at high risk. *Eur J Prev Cardiol* 2016;23:947-55.
6. Bai G, Zhang J, Zhao C, *et al.* Adherence to a healthy lifestyle and a DASH-style diet and risk of hypertension in Chinese individuals. *Hypertens Res* 2017;40:196-202.
7. Berstad P, Botteri E, Larsen IK, *et al.* Lifestyle changes at middle age and mortality: a population-based prospective cohort study. *J Epidemiol Community Health* 2017;71:59-66.
8. Byun W, Sieverdes JC, Sui X, *et al.* Effect of positive health factors and all-cause mortality in men. *Med Sci Sports Exerc* 2010;42:1632-38.
9. Chyou PH, Burchfiel CM, Yano K, *et al.* Obesity, alcohol consumption, smoking, and mortality. *Ann Epidemiol* 1997;7:311-7.
10. Dagenais GR, Jung H, Lonn E, *et al.* Effects of lipid-lowering and antihypertensive treatments in addition to healthy lifestyles in primary prevention: an analysis of the HOPE-3 trial. *J Am Heart Assoc* 2018;7:e008918.
11. Djousse L, Driver JA, Gaziano JM. Relation between modifiable lifestyle factors and lifetime risk of heart failure. *JAMA* 2009;302:394-400.
12. Dobson A, McLaughlin D, Almeida O, *et al.* Impact of behavioural risk factors on death within 10 years for women and men in their 70s: absolute risk charts. *BMC Public Health* 2012;12:669.
13. Foraker RE, Greiner M, Sims M, *et al.* Comparison of risk scores for the prediction of stroke in African Americans: findings from the Jackson Heart Study. *Am Heart J* 2016;177:25-32.
14. Hardoon SL, Whincup PH, Lennon LT, *et al.* How much of the recent decline in the incidence of myocardial infarction in British men can be explained by changes in cardiovascular risk factors? Evidence from a prospective population-based study. *Circulation* 2008;117:598-604.
15. Haveman-Nies A, de Groot L, Burema J, *et al.* Dietary quality and lifestyle factors in relation to 10-year mortality in older Europeans: the SENECA study. *Am J Epidemiol* 2002;156:962-8.
16. Heidemann C, Boeing H, Pischon T, *et al.* Association of a diabetes risk score with risk of

- myocardial infarction, stroke, specific types of cancer, and mortality: a prospective study in the European Prospective Investigation into Cancer and Nutrition (EPIC)-Potsdam cohort. *Eur J Epidemiol* 2009;24:281-88.
17. Iestra J, Knoops K, Kromhout D, *et al.* Lifestyle, Mediterranean diet and survival in European post-myocardial infarction patients. *Eur J Cardiovasc Prev Rehabil* 2006;13:894-900.
  18. Khawaja O, Kotler G, Gaziano JM, *et al.* Usefulness of desirable lifestyle factors to attenuate the risk of heart failure among offspring whose parents had myocardial infarction before age 55 years. *Am J Cardiol* 2012;110:326-30.
  19. Kim LG, Adamson J, Ebrahim S. Influence of life-style choices on locomotor disability, arthritis and cardiovascular disease in older women: Prospective cohort study. *Age Ageing* 2013;42:696-701.
  20. Li K, Monni S, Husing A, *et al.* Primary preventive potential of major lifestyle risk factors for acute myocardial infarction in men: an analysis of the EPIC-Heidelberg cohort. *Eur J Epidemiol* 2014;29:27-34.
  21. Li Y, Ley SH, VanderWeele TJ, *et al.* Joint association between birth weight at term and later life adherence to a healthy lifestyle with risk of hypertension: a prospective cohort study. *BMC Med* 2015;13:175.
  22. Manuel DG, Tuna M, Perez R, *et al.* Predicting stroke risk based on health behaviours: development of the Stroke Population Risk Tool (SPoRT). *PLoS One* 2015;10:e0143342.
  23. Manuel DG, Perez R, Sanmartin C, *et al.* Measuring burden of unhealthy behaviours using a multivariable predictive approach: life expectancy lost in Canada attributable to smoking, alcohol, physical inactivity, and diet. *PLoS Med* 2016;13:e1002082.
  24. Menotti A, Puddu PE, Lanti M, *et al.* Lifestyle habits and mortality from all and specific causes of death: 40-year follow-up in the Italian rural areas of the seven countries study. *J Nutr Health Aging* 2014;18:314-21.
  25. Menotti A, Puddu PE, Maiani G, *et al.* Cardiovascular and other causes of death as a function of lifestyle habits in a quasi extinct middle-aged male population. A 50-year follow-up study. *Int J Cardiol* 2016;210:173-78.
  26. Metzner HL, Carman WJ, House J. Health practices, risk factors, and chronic disease in Tecumseh. *Prev Med* 1983;12:491-507.
  27. Nakano K, Yabe J, Yasumura S. Health practice and total mortality among middle-aged and elderly residents in Sukagawa, Japan. *Nihon Koshu Eisei Zasshi* 2006;53:329-37.
  28. O'Doherty MG, Cairns K, O'Neill V, *et al.* Effect of major lifestyle risk factors, independent and jointly, on life expectancy with and without cardiovascular disease: results from the Consortium on Health and Ageing Network of Cohorts in Europe and the United States (CHANCES). *Eur J Epidemiol* 2016;31:455-68.
  29. Pronk NP, Lowry M, Kottke TE, *et al.* The association between optimal lifestyle adherence and short-term incidence of chronic conditions among employees. *Popul Health Manag* 2010;13:289-95.
  30. Rhee CW, Kim JY, Park BJ, *et al.* Impact of individual and combined health behaviors on all

- causes of premature mortality among middle aged men in Korea: the Seoul male cohort study. *J Prev Med Public Health* 2012;45:14-20.
31. Rotevatn S, Akslen LA, Bjelke E. Lifestyle and mortality among Norwegian men. *Prev Med* 1989;18:433-43.
  32. Shaw BA, Agahi N. A prospective cohort study of health behavior profiles after age 50 and mortality risk. *BMC Public Health* 2012;12:803.
  33. Spencer CA, Jamrozik K, Lawrence-Brown M, *et al.* Lifestyle still predicts mortality in older men with established vascular disease. *Prev Med* 2005;41:583-88.
  34. Spencer CA, Jamrozik K, Norman PE, *et al.* A simple lifestyle score predicts survival in healthy elderly men. *Prev Med* 2005;40:712-17.
  35. Stampfer MJ, Hu FB, Manson JE, *et al.* Primary prevention of coronary heart disease in women through diet and lifestyle. *N Engl J Med* 2000;343:16-22.
  36. Takeshita T, Morimoto K. Effects of lifestyle on health status. *Rinsho Byori* 1995;43:1087-94.
  37. Tikik K, Sookthai D, Monni S, *et al.* Primary preventive potential for stroke by avoidance of major lifestyle risk factors: the European Prospective Investigation into Cancer and Nutrition-Heidelberg cohort. *Stroke* 2014;45:2041-46.
  38. Whitley E, Batty GD, Hunt K, *et al.* The role of health behaviours across the life course in the socioeconomic patterning of all-cause mortality: the west of Scotland twenty-07 prospective cohort study. *Ann Behav Med* 2014;47:148-57.
  39. Xanthakis V, Enserro DM, Murabito JM, *et al.* Ideal cardiovascular health: associations with biomarkers and subclinical disease and impact on incidence of cardiovascular disease in the Framingham Offspring Study. *Circulation* 2014;130:1676-83.
  40. Yokoyama A, Katada C, Yokoyama T, *et al.* Alcohol abstinence and risk assessment for second esophageal cancer in Japanese men after mucosectomy for early esophageal cancer. *PLoS One* 2017;12:e0175182.
  41. Enserro DM, Vasan RS, Xanthakis V. Twenty-year trends in the American Heart Association cardiovascular health score and impact on subclinical and clinical cardiovascular disease: the Framingham Offspring study. *J Am Heart Assoc* 2018;7:e008741.
  42. King DE, Mainous AG, 3rd, Geesey ME. Turning back the clock: adopting a healthy lifestyle in middle age. *Am J Med* 2007;120:598-603.
  43. Shah AM, Claggett B, Folsom AR, *et al.* Ideal cardiovascular health during adult life and cardiovascular structure and function among the elderly. *Circulation* 2015;132:1979-89.
  44. Ahmad MI, Chevli PA, Barot H, *et al.* Interrelationships Between American Heart Association's Life's Simple 7, ECG Silent Myocardial Infarction, and Cardiovascular Mortality. *J Am Heart Assoc* 2019;8:e011648.
  45. Ford ES, Zhao G, Tsai J, *et al.* Low-risk lifestyle behaviors and all-cause mortality: findings from the National Health and Nutrition Examination Survey III Mortality Study. *Am J Public Health* 2011;101:1922-9.
  46. Belloc NB. Relationship of health practices and mortality. *Prev Med* 1973;2:67-81.
  47. Breslow L, Enstrom JE. Persistence of health habits and their relationship to mortality. *Prev*

- Med* 1980;9:469-83.
48. Cohen L, Curhan GC, Forman JP. Influence of age on the association between lifestyle factors and risk of hypertension. *J Am Soc Hypertens* 2012;6:284-90.
  49. Chomistek AK, Chiuve SE, Eliassen AH, *et al.* Healthy lifestyle in the primordial prevention of cardiovascular disease among young women. *J Am Coll Cardiol* 2015;65:43-51.
  50. Eguchi E, Iso Prof H, Wada Y, *et al.* Parental history and lifestyle behaviors in relation to mortality from stroke among Japanese men and women: the Japan Collaborative Cohort Study. *J Epidemiol* 2012;22:331-39.
  51. Eguchi E, Iso H, Honjo K, *et al.* No modifying effect of education level on the association between lifestyle behaviors and cardiovascular mortality: the Japan Collaborative Cohort Study. *Sci Rep* 2017;7:39820.
  52. Forman JP, Stampfer MJ, Curhan GC. Diet and lifestyle risk factors associated with incident hypertension in women. *JAMA* 2009;302:401-11.
  53. Gao J, Sun H, Liang X, *et al.* Ideal cardiovascular health behaviors and factors prevent the development of hypertension in prehypertensive subjects. *Clin Exp Hypertens* 2015;37:650-55.
  54. Zhang C, Shi J, Huang Z, *et al.* Relationship between 'ideal' cardiovascular behaviors and factors and the incidence of hypertension. *Zhonghua liu xing bing xue za zhi* 2014;35:494-99.
  55. Kabat GC, Matthews CE, Kamensky V, *et al.* Adherence to cancer prevention guidelines and cancer incidence, cancer mortality, and total mortality: a prospective cohort study. *Am J Clin Nutr* 2015;101:558-69.
  56. Behrens G, Fischer B, Kohler S, *et al.* Healthy lifestyle behaviors and decreased risk of mortality in a large prospective study of U.S. women and men. *Eur J Epidemiol* 2013;28:361-72.
  57. Kurth T, Moore SC, Gaziano JM, *et al.* Healthy lifestyle and the risk of stroke in women. *Arch Intern Med* 2006;166:1403-09.
  58. Rist PM, Buring JE, Kase CS, *et al.* Healthy lifestyle and functional outcomes from stroke in women. *Am J Med* 2016;129:715-24.e2.
  59. Mancini GBJ, Maron DJ, Hartigan PM, *et al.* Lifestyle, Glycosylated Hemoglobin A1c, and Survival Among Patients With Stable Ischemic Heart Disease and Diabetes. *J Am Coll Cardiol* 2019;73:2049-58.
  60. Maron DJ, Mancini GBJ, Hartigan PM, *et al.* Healthy Behavior, Risk Factor Control, and Survival in the COURAGE Trial. *J Am Coll Cardiol* 2018;72:2297-305.
  61. Matheson EM, King DE, Everett CJ. Healthy lifestyle habits and mortality in overweight and obese individuals. *J Am Board Fam Med* 2012;25:9-15.
  62. Myint PK, Smith RD, Luben RN, *et al.* Lifestyle behaviours and quality-adjusted life years in middle and older age. *Age Ageing* 2011;40:589-95.
  63. Khaw KT, Wareham N, Bingham S, *et al.* Combined impact of health behaviours and mortality in men and women: the EPIC-Norfolk prospective population study. *PLoS Med* 2008;5:0039-47.

64. Perrot N, Verbeek R, Sandhu M, *et al.* Ideal cardiovascular health influences cardiovascular disease risk associated with high lipoprotein(a) levels and genotype: the EPIC-Norfolk prospective population study. *Atherosclerosis* 2017;256:47-52.
65. Lachman S, Peters RJ, Lentjes MA, *et al.* Ideal cardiovascular health and risk of cardiovascular events in the EPIC-Norfolk prospective population study. *Eur J Prev Cardiol* 2016;23:986-94.
66. Veronese N, Li Y, Manson JE, *et al.* Combined associations of body weight and lifestyle factors with all cause and cause specific mortality in men and women: prospective cohort study. *BMJ* 2016;355:i5855.
67. Van Dam RM, Li T, Spiegelman D, *et al.* Combined impact of lifestyle factors on mortality: prospective cohort study in US women. *BMJ* 2008;337:742-45.
68. Weikert C, Berger K, Heidemann C, *et al.* Joint effects of risk factors for stroke and transient ischemic attack in a German population: the EPIC Potsdam Study. *J Neurol* 2007;254:315-21.
69. Ford ES, Bergmann MM, Kroger J, *et al.* Healthy living is the best revenge: findings from the European Prospective Investigation Into Cancer and Nutrition-Potsdam study. *Arch Intern Med* 2009;169:1355-62.
70. Yang X, Wang A, Liu X, *et al.* Positive changes in ideal CVH metrics reduce the incidence of stroke. *Sci Rep* 2016;6:19673.
71. Miao C, Bao M, Xing A, *et al.* Cardiovascular Health Score and the risk of cardiovascular diseases. *PLoS One* 2015;10:e0131537.
72. Zhang Y, Tuomilehto J, Jousilahti P, *et al.* Lifestyle factors and antihypertensive treatment on the risks of ischemic and hemorrhagic stroke. *Hypertension* 2012;60:906-12.
73. Zhang Y, Tuomilehto J, Jousilahti P, *et al.* Lifestyle factors on the risks of ischemic and hemorrhagic stroke. *Arch Intern Med* 2011;171:1811-18.
74. Zhao HY, Liu XX, Wang AX, *et al.* Ideal cardiovascular health and incident hypertension: the longitudinal community-based Kailuan study. *Medicine (Baltimore)* 2016;95:e5415.
75. Ahmed HM, Blaha MJ, Nasir K, *et al.* Low-risk lifestyle, coronary calcium, cardiovascular events, and mortality: results from MESA. *Am J Epidemiol* 2013;178:12-21.
76. Artero EG, España-Romero V, Lee DC, *et al.* Ideal cardiovascular health and mortality: Aerobics Center Longitudinal Study. *Mayo Clin Proc* 2012;87:944-52.
77. Atkins JL, Delgado J, Pilling LC, *et al.* Impact of low cardiovascular risk profiles on geriatric outcomes: evidence from 421,000 participants in two cohorts. *J Gerontol A Biol Sci Med Sci* 2018.
78. Berard E, Bongard V, Haas B, *et al.* Score of adherence to 2016 European Cardiovascular Prevention Guidelines predicts cardiovascular and all-cause mortality in the general population. *Can J Cardiol* 2017;33:1298-304.
79. Bonaccio M, Di Castelnuovo A, Costanzo S, *et al.* Impact of combined healthy lifestyle factors on survival in an adult general population and in high-risk groups: prospective results from the Moli-sani Study. *J Intern Med* 2019;286:207-20.
80. Booth JN, 3rd, Levitan EB, Brown TM, *et al.* Effect of sustaining lifestyle modifications

- (nonsmoking, weight reduction, physical activity, and mediterranean diet) after healing of myocardial infarction, percutaneous intervention, or coronary bypass (from the REasons for Geographic and Racial Differences in Stroke Study). *Am J Cardiol* 2014;113:1933-40.
81. Booth JN, 3rd, Colantonio LD, Howard G, *et al.* Healthy lifestyle factors and incident heart disease and mortality in candidates for primary prevention with statin therapy. *Int J Cardiol* 2016;207:196-202.
  82. Carlsson AC, Theobald H, Wandell PE. Health factors and longevity in men and women: a 26-year follow-up study. *Eur J Epidemiol* 2010;25:547-51.
  83. Carlsson AC, Wandell PE, Gigante B, *et al.* Seven modifiable lifestyle factors predict reduced risk for ischemic cardiovascular disease and all-cause mortality regardless of body mass index: a cohort study. *Int J Cardiol* 2013;168:946-52.
  84. Cerhan JR, Potter JD, Gilmore JM, *et al.* Adherence to the AICR cancer prevention recommendations and subsequent morbidity and mortality in the Iowa Women's Health Study cohort. *Cancer Epidemiol Biomarkers Prev* 2004;13:1114-20.
  85. Chakravarty EF, Hubert HB, Krishnan E, *et al.* Lifestyle risk factors predict disability and death in healthy aging adults. *Am J Med* 2012;125:190-97.
  86. Cheng E, Um CY, Prizment A, *et al.* Associations of evolutionary-concordance diet, Mediterranean diet and evolutionary-concordance lifestyle pattern scores with all-cause and cause-specific mortality. *Br J Nutr* 2018:1-10.
  87. Cloud AJ, Thai A, Liao Y, *et al.* The impact of cancer prevention guideline adherence on overall mortality in a high-risk cohort of women from the New York site of the Breast Cancer Family Registry. *Breast Cancer Res Treat* 2015;149:537-46.
  88. Diaz KM, Booth IJN, Calhoun DA, *et al.* Healthy lifestyle factors and risk of cardiovascular events and mortality in treatment-resistant hypertension: the Reasons for Geographic and Racial Differences in Stroke study. *Hypertension* 2014;64:465-71.
  89. Ding D, Rogers K, van der Ploeg H, *et al.* Traditional and emerging lifestyle risk behaviors and all-cause mortality in middle-aged and older adults: evidence from a large population-based Australian cohort. *PLoS Med* 2015;12:e1001917.
  90. Dong C, Rundek T, Wright CB, *et al.* Ideal cardiovascular health predicts lower risks of myocardial infarction, stroke, and vascular death across whites, blacks, and hispanics: the northern Manhattan study. *Circulation* 2012;125:2975-84.
  91. Dunkler D, Kohl M, Teo KK, *et al.* Population-attributable fractions of modifiable lifestyle factors for CKD and mortality in individuals with type 2 diabetes: a cohort study. *Am J Kidney Dis* 2016;68:29-40.
  92. Emberson JR, Whincup PH, Morris RW, *et al.* Lifestyle and cardiovascular disease in middle-aged British men: the effect of adjusting for within-person variation. *Eur Heart J* 2005;26:1774-82.
  93. Fazel-Tabar Malekshah A, Zaroudi M, Etemadi A, *et al.* The combined effects of healthy lifestyle behaviors on all-cause mortality: the Golestan Cohort Study. *Arch Iran Med* 2016;19:752-61.
  94. Ford ES, Greenlund KJ, Hong Y. Ideal cardiovascular health and mortality from all causes



- and diseases of the circulatory system among adults in the United States. *Circulation* 2012;125:987-95.
95. Ford ES, Bergmann MM, Boeing H, *et al.* Healthy lifestyle behaviors and all-cause mortality among adults in the United States. *Prev Med* 2012;55:23-7.
  96. Foster HME, Celis-Morales CA, Nicholl BI, *et al.* The effect of socioeconomic deprivation on the association between an extended measurement of unhealthy lifestyle factors and health outcomes: a prospective analysis of the UK Biobank cohort. *The Lancet Public health* 2018;3:e576-e85.
  97. Gopinath B, Flood VM, Burlutsky G, *et al.* Combined influence of health behaviors on total and cause-specific mortality. *Arch Intern Med* 2010;170:1605-7.
  98. Greenlee H, Strizich G, Lovasi GS, *et al.* Concordance with prevention guidelines and subsequent cancer, cardiovascular disease, and mortality: a longitudinal study of older adults. *Am J Epidemiol* 2017;186:1168-79.
  99. Hamer M, Bates CJ, Mishra GD. Multiple health behaviors and mortality risk in older adults. *J Am Geriatr Soc* 2011;59:370-2.
  100. Heitz AE, Baumgartner RN, Baumgartner KB, *et al.* Healthy lifestyle impact on breast cancer-specific and all-cause mortality. *Breast Cancer Res Treat* 2018;167:171-81.
  101. Inoue-Choi M, Robien K, Lazovich D. Adherence to the WCRF/AICR guidelines for cancer prevention is associated with lower mortality among older female cancer survivors. *Cancer Epidemiol Biomarkers Prev* 2013;22:792-802.
  102. Iversen L, Hannaford PC, Lee AJ, *et al.* Impact of lifestyle in middle-aged women on mortality: evidence from the Royal College of general practitioners' oral contraception study. *Br J Gen Pract* 2010;60:563-69.
  103. Jin Y, Tanaka T, Bandinelli S, *et al.* Overall cardiovascular health is associated with all-cause and cardiovascular disease mortality among older community-dwelling men and women. *J Aging Health* 2017;29:437-53.
  104. Kim JY, Ko YJ, Rhee CW, *et al.* Cardiovascular health metrics and all-cause and cardiovascular disease mortality among middle-aged men in Korea: the Seoul male cohort study. *J Prev Med Public Health* 2013;46:319-28.
  105. King DE, Mainous AG, Matheson EM, *et al.* Impact of healthy lifestyle on mortality in people with normal blood pressure, LDL cholesterol, and C-reactive protein. *Eur J Prev Cardiol* 2013;20:73-79.
  106. Knoops KT, de Groot LC, Kromhout D, *et al.* Mediterranean diet, lifestyle factors, and 10-year mortality in elderly European men and women: the HALE project. *JAMA* 2004;292:1433-9.
  107. Krokstad S, Ding D, Grunseit AC, *et al.* Multiple lifestyle behaviours and mortality, findings from a large population-based Norwegian cohort study - The HUNT Study. *BMC Public Health* 2017;17:58.
  108. Kvaavik E, Batty GD, Ursin G, *et al.* Influence of individual and combined health behaviors on total and cause-specific mortality in men and women: The United Kingdom Health and Lifestyle Survey. *Arch Intern Med* 2010;170:711-18.

109. Larsson SC, Kaluza J, Wolk A. Combined impact of healthy lifestyle factors on lifespan: two prospective cohorts. *J Intern Med* 2017;282:209-19.
110. Lee CD, Sui X, Blair SN. Combined effects of cardiorespiratory fitness, not smoking, and normal waist girth on morbidity and mortality in men. *Arch Intern Med* 2009;169:2096-101.
111. Leger KJ, Baker KS, Cushing-Haugen KL, *et al.* Lifestyle factors and subsequent ischemic heart disease risk after hematopoietic cell transplantation. *Cancer* 2018;124:1507-15.
112. Lin CC, Li CI, Liu CS, *et al.* Impact of lifestyle-related factors on all-cause and cause-specific mortality in patients with type 2 diabetes: the Taichung Diabetes Study. *Diabetes Care* 2012;35:105-12.
113. Lin MP, Ovbiagele B, Markovic D, *et al.* "Life's Simple 7" and long-term mortality after stroke. *J Am Heart Assoc* 2015;4.
114. Lingfors H, Persson LG. All-cause mortality among young men 24-26 years after a lifestyle health dialogue in a Swedish primary care setting: a longitudinal follow-up register study. *BMJ open* 2019;9:e022474.
115. Liu Y, Chi HJ, Cui LF, *et al.* The ideal cardiovascular health metrics associated inversely with mortality from all causes and from cardiovascular diseases among adults in a Northern Chinese industrial city. *PLoS One* 2014;9:e89161.
116. Lohse T, Faeh D, Bopp M, *et al.* Adherence to the cancer prevention recommendations of the World Cancer Research Fund/American Institute for Cancer Research and mortality: a census-linked cohort. *Am J Clin Nutr* 2016;104:678-85.
117. Martin-Diener E, Meyer J, Braun J, *et al.* The combined effect on survival of four main behavioural risk factors for non-communicable diseases. *Prev Med* 2014;65:148-52.
118. Martinez-Gomez D, Guallar-Castillon P, Leon-Munoz LM, *et al.* Combined impact of traditional and non-traditional health behaviors on mortality: a national prospective cohort study in Spanish older adults. *BMC Med* 2013;11:47.
119. McCullough ML, Patel AV, Kushi LH, *et al.* Following cancer prevention guidelines reduces risk of cancer, cardiovascular disease, and all-cause mortality. *Cancer Epidemiol Biomarkers Prev* 2011;20:1089-97.
120. Meng L, Maskarinec G, Lee J, *et al.* Lifestyle factors and chronic diseases: application of a composite risk index. *Prev Med* 1999;29:296-304.
121. Minlikeeva AN, Cannioto R, Jensen A, *et al.* Joint exposure to smoking, excessive weight, and physical inactivity and survival of ovarian cancer patients, evidence from the Ovarian Cancer Association Consortium. *Cancer Causes Control* 2019;30:537-47.
122. Mok Y, Sang Y, Ballew SH, *et al.* American Heart Association's Life's Simple 7 at middle age and prognosis after myocardial infarction in later life. *J Am Heart Assoc* 2018;7:e007658.
123. Muntner P, Judd SE, Gao L, *et al.* Cardiovascular risk factors in CKD associate with both ESRD and mortality. *J Am Soc Nephrol* 2013;24:1159-65.
124. Nechuta SJ, Shu XO, Li HL, *et al.* Combined impact of lifestyle-related factors on total and cause-specific mortality among Chinese women: prospective cohort study. *PLoS Med* 2010;7:e1000339.

125. Nöthlings U, Ford ES, Kroger J, *et al.* Lifestyle factors and mortality among adults with diabetes: findings from the European Prospective Investigation into Cancer and Nutrition-Potsdam study. *J Diabetes* 2010;2:112-7.
126. Odegaard AO, Koh WP, Gross MD, *et al.* Combined lifestyle factors and cardiovascular disease mortality in Chinese men and women: the Singapore Chinese health study. *Circulation* 2011;124:2847-54.
127. Patel YR, Gadiraju TV, Gaziano JM, *et al.* Adherence to healthy lifestyle factors and risk of death in men with diabetes mellitus: The Physicians' Health Study. *Clin Nutr* 2018;37:139-43.
128. Pelsler C, Arem H, Pfeiffer RM, *et al.* Prediagnostic lifestyle factors and survival after colon and rectal cancer diagnosis in the National Institutes of Health (NIH)-AARP Diet and Health Study. *Cancer* 2014;120:1540-47.
129. Petersen KE, Johnsen NF, Olsen A, *et al.* The combined impact of adherence to five lifestyle factors on all-cause, cancer and cardiovascular mortality: a prospective cohort study among Danish men and women. *Br J Nutr* 2015;113:849-58.
130. Prinelli F, Yannakoulia M, Anastasiou CA, *et al.* Mediterranean diet and other lifestyle factors in relation to 20-year all-cause mortality: a cohort study in an Italian population. *Br J Nutr* 2015;113:1003-11.
131. Ricardo AC, Madero M, Yang W, *et al.* Adherence to a healthy lifestyle and all-cause mortality in CKD. *Clin J Am Soc Nephrol* 2013;8:602-09.
132. Ricardo AC, Anderson CA, Yang W, *et al.* Healthy lifestyle and risk of kidney disease progression, atherosclerotic events, and death in CKD: findings from the Chronic Renal Insufficiency Cohort (CRIC) study. *Am J Kidney Dis* 2015;65:412-24.
133. Rizzuto D, Keller L, Orsini N, *et al.* Effect of the interplay between genetic and behavioral risks on survival after age 75. *J Am Geriatr Soc* 2016;64:2440-47.
134. Sovic S, Vitale K, Brborovic O, *et al.* Association of behavioral cardiovascular risk factors with mortality in Croatian adult population: the CroHort study. *Coll Antropol* 2012;36 Suppl 1:177-82.
135. Tamakoshi A, Tamakoshi K, Lin Y, *et al.* Healthy lifestyle and preventable death: findings from the Japan Collaborative Cohort (JACC) Study. *Prev Med* 2009;48:486-92.
136. Tamakoshi A, Kawado M, Ozasa K, *et al.* Impact of smoking and other lifestyle factors on life expectancy among Japanese: findings from the Japan Collaborative Cohort (JACC) Study. *J Epidemiol* 2010;20:370-76.
137. Tamosiunas A, Luksiene D, Baceviciene M, *et al.* Health factors and risk of all-cause, cardiovascular, and coronary heart disease mortality: findings from the MONICA and HAPIEE studies in Lithuania. *PLoS One* 2014;9:e114283.
138. Thomson CA, Van Horn L, Caan BJ, *et al.* Cancer incidence and mortality during the intervention and postintervention periods of the women's health initiative dietary modification trial. *Cancer Epidemiol Biomarkers Prev* 2014;23:2924-35.
139. Towfighi A, Markovic D, Ovbiagele B. Impact of a healthy lifestyle on all-cause and cardiovascular mortality after stroke in the USA. *J Neurol Neurosurg Psychiatry*

- 2012;83:146-51.
140. Tsubono Y, Fukao A, Hisamichi S. Health practices and mortality in a rural Japanese population. *Tohoku J Exp Med* 1993;171:339-48.
  141. Tsubono Y, Koizumi Y, Nakaya N, *et al.* Health practices and mortality in Japan: combined effects of smoking, drinking, walking and body mass index in the Miyagi Cohort Study. *J Epidemiol* 2004;14 Suppl 1:S39-45.
  142. Van Blarigan EL, Fuchs CS, Niedzwiecki D, *et al.* Association of survival with adherence to the American Cancer Society Nutrition and Physical Activity Guidelines for Cancer Survivors after colon cancer diagnosis: the CALGB 89803/Alliance Trial. *JAMA oncology* 2018;4:783-90.
  143. Van Den Brandt PA. The impact of a Mediterranean diet and healthy lifestyle on premature mortality in men and women. *Am J Clin Nutr* 2011;94:913-20.
  144. van Lee L, Geelen A, Kieffe-de Jong JC, *et al.* Adherence to the Dutch dietary guidelines is inversely associated with 20-year mortality in a large prospective cohort study. *Eur J Clin Nutr* 2016;70:262-8.
  145. Vergnaud AC, Romaguera D, Peeters PH, *et al.* Adherence to the World Cancer Research Fund/American Institute for Cancer Research guidelines and risk of death in Europe: results from the European Prospective Investigation into Nutrition and Cancer cohort study. *Am J Clin Nutr* 2013;97:1107-20.
  146. Warren Andersen S, Blot WJ, Shu XO, *et al.* Associations between neighborhood environment, health behaviors, and mortality. *Am J Prev Med* 2018;54:87-95.
  147. Wingard DL, Berkman LF, Brand RJ. A multivariate analysis of health-related practices: a nine-year mortality follow-up of the Alameda County Study. *Am J Epidemiol* 1982;116:765-75.
  148. Yang Q, Cogswell ME, Flanders WD, *et al.* Trends in cardiovascular health metrics and associations with all-cause and CVD mortality among US adults. *JAMA* 2012;307:1273-83.
  149. Yates LB, Djousse L, Kurth T, *et al.* Exceptional longevity in men: modifiable factors associated with survival and function to age 90 years. *Arch Intern Med* 2008;168:284-90.
  150. Yun JE, Won S, Kimm H, *et al.* Effects of a combined lifestyle score on 10-year mortality in Korean men and women: a prospective cohort study. *BMC Public Health* 2012;12:673.
  151. Zhang QL, Zhao LG, Zhang W, *et al.* Combined impact of known lifestyle factors on total and cause-specific mortality among Chinese men: a prospective cohort study. *Sci Rep* 2017;7:5293.
  152. Zhou L, Zhao L, Wu Y, *et al.* Ideal cardiovascular health metrics and its association with 20-year cardiovascular morbidity and mortality in a Chinese population. *J Epidemiol Community Health* 2018;72:752-58.
  153. Chiuve SE, Fung TT, Rexrode KM, *et al.* Adherence to a low-risk, healthy lifestyle and risk of sudden cardiac death among women. *JAMA* 2011;306:62-69.
  154. Eguchi E, Iso H, Tanabe N, *et al.* Healthy lifestyle behaviours and cardiovascular mortality among Japanese men and women: the Japan Collaborative Cohort Study. *Eur Heart J* 2012;33:467-77.

155. Eguchi E, Iso H, Tanabe N, *et al.* Is the association between healthy lifestyle behaviors and cardiovascular mortality modified by overweight status? The Japan Collaborative Cohort Study. *Prev Med* 2014;62:142-47.
156. Eriksen A, Tillin T, Connor LO, *et al.* The impact of health behaviours on incident cardiovascular disease in Europeans and South Asians - a prospective analysis in the UK SABRE study. *PLoS One* 2015;10:e0117364.
157. Han C, Liu F, Yang X, *et al.* Ideal cardiovascular health and incidence of atherosclerotic cardiovascular disease among Chinese adults: the China-PAR project. *Sci China Life Sci* 2018;61:504-14.
158. Hoevenaar-Blom MP, Spijkerman AM, Kromhout D, *et al.* Sufficient sleep duration contributes to lower cardiovascular disease risk in addition to four traditional lifestyle factors: the MORGEN study. *Eur J Prev Cardiol* 2014;21:1367-75.
159. Liu G, Li Y, Hu Y, *et al.* Influence of lifestyle on incident cardiovascular disease and mortality in patients with diabetes mellitus. *J Am Coll Cardiol* 2018;71:2867-76.
160. Luoto R, Prattala R, Uutela A, *et al.* Impact of unhealthy behaviors on cardiovascular mortality in Finland, 1978-1993. *Prev Med* 1998;27:93-100.
161. Mitchell JA, Bornstein DB, Sui X, *et al.* The impact of combined health factors on cardiovascular disease mortality. *Am Heart J* 2010;160:102-08.
162. Struijk EA, May AM, Wezenbeek NL, *et al.* Adherence to dietary guidelines and cardiovascular disease risk in the EPIC-NL cohort. *Int J Cardiol* 2014;176:354-9.
163. Warren Andersen S, Zheng W, Sonderman J, *et al.* Combined impact of health behaviors on mortality in low-income Americans. *Am J Prev Med* 2016;51:344-55.
164. Diaz-Gutierrez J, Ruiz-Canela M, Gea A, *et al.* Association between a healthy lifestyle score and the risk of cardiovascular disease in the SUN cohort. *Rev Esp Cardiol* 2018;71:1001-09.
165. Folsom AR, Yatsuya H, Nettleton JA, *et al.* Community prevalence of ideal cardiovascular health, by the American Heart Association definition, and relationship with cardiovascular disease incidence. *J Am Coll Cardiol* 2011;57:1690-6.
166. Foraker RE, Abdel-Rasoul M, Kuller LH, *et al.* Cardiovascular health and incident cardiovascular disease and cancer: the Women's Health Initiative. *Am J Prev Med* 2016;50:236-40.
167. Hulsege G, Looman M, Smit HA, *et al.* Lifestyle changes in young adulthood and middle age and risk of cardiovascular disease and all-cause mortality: the Doetinchem Cohort Study. *J Am Heart Assoc* 2016;5:e002432.
168. Long GH, Cooper AJ, Wareham NJ, *et al.* Healthy behavior change and cardiovascular outcomes in newly diagnosed type 2 diabetic patients: a cohort analysis of the ADDITION-Cambridge study. *Diabetes Care* 2014;37:1712-20.
169. Ommerborn MJ, Blackshear CT, Hickson DA, *et al.* Ideal cardiovascular health and incident cardiovascular events: the Jackson Heart Study. *Am J Prev Med* 2016;51:502-6.
170. Paynter NP, La Monte MJ, Manson JE, *et al.* Comparison of lifestyle-based and traditional cardiovascular disease prediction in a multiethnic cohort of nonsmoking Women.

- Circulation* 2014;130:1466-73.
171. Wu S, Huang Z, Yang X, *et al.* Prevalence of ideal cardiovascular health and its relationship with the 4-year cardiovascular events in a Northern Chinese industrial city. *Circ Cardiovasc Qual Outcomes* 2012;5:487-93.
  172. Britton A, Marmot MG, Shipley M. Who benefits most from the cardioprotective properties of alcohol consumption--health freaks or couch potatoes? *J Epidemiol Community Health* 2008;62:905-8.
  173. Akesson A, Weismayer C, Newby PK, *et al.* Combined effect of low-risk dietary and lifestyle behaviors in primary prevention of myocardial infarction in women. *Arch Intern Med* 2007;167:2122-7.
  174. Akesson A, Larsson SC, Discacciati A, *et al.* Low-risk diet and lifestyle habits in the primary prevention of myocardial infarction in men: a population-based prospective cohort study. *J Am Coll Cardiol* 2014;64:1299-306.
  175. Chiuve SE, McCullough ML, Sacks FM, *et al.* Healthy lifestyle factors in the primary prevention of coronary heart disease among men: benefits among users and nonusers of lipid-lowering and antihypertensive medications. *Circulation* 2006;114:160-67.
  176. Khera AV, Emdin CA, Drake I, *et al.* Genetic risk, adherence to a healthy lifestyle, and coronary disease. *N Engl J Med* 2016;375:2349-58.
  177. Lv J, Yu C, Guo Y, *et al.* Adherence to healthy lifestyle and cardiovascular diseases in the Chinese population. *J Am Coll Cardiol* 2017;69:1116-25.
  178. Taubman SL, Robins JM, Mittleman MA, *et al.* Intervening on risk factors for coronary heart disease: an application of the parametric g-formula. *Int J Epidemiol* 2009;38:1599-611.
  179. Chiuve SE, Rexrode KM, Spiegelman D, *et al.* Primary prevention of stroke by healthy lifestyle. *Circulation* 2008;118:947-54.
  180. Kulshreshtha A, Vaccarino V, Judd SE, *et al.* Life's Simple 7 and risk of incident stroke: the reasons for geographic and racial differences in stroke study. *Stroke* 2013;44:1909-14.
  181. Larsson SC, Akesson A, Wolk A. Healthy diet and lifestyle and risk of stroke in a prospective cohort of women. *Neurology* 2014;83:1699-704.
  182. Larsson SC, Akesson A, Wolk A. Primary prevention of stroke by a healthy lifestyle in a high-risk group. *Neurology* 2015;84:2224-8.
  183. Myint PK, Luben RN, Wareham NJ, *et al.* Combined effect of health behaviours and risk of first ever stroke in 20,040 men and women over 11 years' follow-up in Norfolk cohort of European Prospective Investigation of Cancer (EPIC Norfolk): prospective population study. *BMJ* 2009;338:b349.
  184. Pase MP, Beiser A, Enserro D, *et al.* Association of ideal cardiovascular health with vascular brain injury and incident dementia. *Stroke* 2016;47:1201-6.
  185. Zhang Q, Zhou Y, Gao X, *et al.* Ideal cardiovascular health metrics and the risks of ischemic and intracerebral hemorrhagic stroke. *Stroke* 2013;44:2451-56.
  186. Agha G, Loucks EB, Tinker LF, *et al.* Healthy lifestyle and decreasing risk of heart failure in women: the Women's Health Initiative observational study. *J Am Coll Cardiol*

- 2014;64:1777-85.
187. Del Gobbo LC, Kalantarian S, Imamura F, *et al.* Contribution of major lifestyle risk factors for incident heart failure in older adults. the Cardiovascular Health Study. *JACC Heart Fail* 2015;3:520-28.
  188. Larsson SC, Tektonidis TG, Gigante B, *et al.* Healthy lifestyle and risk of heart failure: results from 2 prospective cohort studies. *Circ Heart Fail* 2016;9:e002855.
  189. Naylor M, Enserro DM, Vasan RS, *et al.* Cardiovascular health status and incidence of heart failure in the Framingham Offspring Study. *Circ Heart Fail* 2016;9:e002416.
  190. Ogunmoroti O, Oni E, Michos ED, *et al.* Life's Simple 7 and incident heart failure: the Multi-Ethnic Study of Atherosclerosis. *J Am Heart Assoc* 2017;6:e005180.
  191. Spahillari A, Talegawkar S, Correa A, *et al.* Ideal cardiovascular health, cardiovascular remodeling, and heart failure in blacks: the Jackson Heart Study. *Circ Heart Fail* 2017;10.
  192. Wang Y, Tuomilehto J, Jousilahti P, *et al.* Lifestyle factors in relation to heart failure among Finnish men and women. *Circ Heart Fail* 2011;4:607-12.
  193. Di Benedetto L, Michels G, Luben R, *et al.* Individual and combined impact of lifestyle factors on atrial fibrillation in apparently healthy men and women: the EPIC-Norfolk prospective population study. *Eur J Prev Cardiol* 2018;25:1374-83.
  194. Larsson SC, Drca N, Jensen-Urstad M, *et al.* Combined impact of healthy lifestyle factors on risk of atrial fibrillation: prospective study in men and women. *Int J Cardiol* 2016;203:46-49.
  195. Lopez-Laguna N, Martinez-Gonzalez MA, Toledo E, *et al.* Risk of peripheral artery disease according to a healthy lifestyle score: the PREDIMED study. *Atherosclerosis* 2018;275:133-40.
  196. Unkart JT, Allison MA, Criqui MH, *et al.* Life's Simple 7 and Peripheral Artery Disease: The Multi-Ethnic Study of Atherosclerosis. *Am J Prev Med* 2019;56:262-70.
  197. Andriolo V, Dietrich S, Knuppel S, *et al.* Traditional risk factors for essential hypertension: analysis of their specific combinations in the EPIC-Potsdam cohort. *Sci Rep* 2019;9:1501.
  198. Banda JA, Clouston K, Sui X, *et al.* Protective health factors and incident hypertension in men. *Am J Hypertens* 2010;23:599-605.
  199. Diaz-Gutierrez J, Ruiz-Estigarribia L, Bes-Rastrollo M, *et al.* The role of lifestyle behaviour on the risk of hypertension in the SUN cohort: The hypertension preventive score. *Prev Med* 2019;123:171-78.
  200. Nguyen B, Bauman A, Ding D. Association between lifestyle risk factors and incident hypertension among middle-aged and older Australians. *Prev Med* 2019;118:73-80.
